# Supplementary material for: Diversity and prevalence of type VI secretion system effectors in clinical Pseudomonas aeruginosa isolates
Source: Frontiers journal article supplement (doi:10.3389/fmicb.2022.1042505), 2023-01-04
Supplement: Data_Sheet_1.zip [file Data_Sheet_1.zip]

## Sheet: Accessory_genome_COGs
query	seed_ortholog	evalue	score	eggNOG_OGs	max_annot_lvl	COG_category	Description	Preferred_name	GOs	EC	KEGG_ko	KEGG_Pathway	KEGG_Module	KEGG_Reaction	KEGG_rclass	BRITE	KEGG_TC	CAZy	BiGG_Reaction	PFAMs
PALA52_00042	287.DR97_2995	0.0	3280.0	COG3210@1|root,COG3210@2|Bacteria,1MX2K@1224|Proteobacteria,1RNRK@1236|Gammaproteobacteria,1YD8T@136841|Pseudomonas aeruginosa group	1236|Gammaproteobacteria	U	haemagglutination activity domain	-	-	-	ko:K15125	ko05133,map05133	-	-	-	ko00000,ko00001,ko00536	-	-	-	DUF637,Fil_haemagg,Fil_haemagg_2,Haemagg_act
PALA52_00043	1441629.PCH70_23520	1.39e-177	546.0	COG3210@1|root,COG3210@2|Bacteria,1MX2K@1224|Proteobacteria,1RNRK@1236|Gammaproteobacteria,1Z73G@136849|Pseudomonas syringae group	1236|Gammaproteobacteria	U	COG3210 Large exoproteins involved in heme utilization or adhesion	-	-	-	ko:K15125	ko05133,map05133	-	-	-	ko00000,ko00001,ko00536	-	-	-	DUF637,ESPR,Fil_haemagg,Fil_haemagg_2,Haemagg_act,PT-VENN,Tox-REase-7
PALA52_00044	465817.ETA_19590	8.25e-47	176.0	COG3210@1|root,COG3210@2|Bacteria,1R938@1224|Proteobacteria,1RRNB@1236|Gammaproteobacteria	2|Bacteria	U	Pre-toxin domain with VENN motif	-	-	-	ko:K15125	ko05133,map05133	-	-	-	ko00000,ko00001,ko00536	-	-	-	EndoU_bacteria,Fil_haemagg_2,Haemagg_act,PT-VENN
PALA52_00046	287.DR97_4557	1.29e-206	601.0	COG3209@1|root,COG3209@2|Bacteria,1MVV1@1224|Proteobacteria,1RP75@1236|Gammaproteobacteria,1YFEJ@136841|Pseudomonas aeruginosa group	1236|Gammaproteobacteria	M	RHS Repeat	-	-	-	-	-	-	-	-	-	-	-	-	DUF11,RHS,RHS_repeat
PALA52_00056	287.DR97_3011	1.49e-125	357.0	COG1859@1|root,COG1859@2|Bacteria,1RD8B@1224|Proteobacteria,1S3U6@1236|Gammaproteobacteria,1YK23@136841|Pseudomonas aeruginosa group	1236|Gammaproteobacteria	J	Removes the 2'-phosphate from RNA via an intermediate in which the phosphate is ADP-ribosylated by NAD followed by a presumed transesterification to release the RNA and generate ADP- ribose 1''-2''-cyclic phosphate (APPR P). May function as an ADP- ribosylase	kptA	GO:0003674,GO:0003824,GO:0016740,GO:0016772	-	ko:K07559	-	-	-	-	ko00000,ko01000,ko03016	-	-	-	PTS_2-RNA
PALA52_00071	287.DR97_3026	2.31e-257	705.0	COG1533@1|root,COG1533@2|Bacteria,1MW0H@1224|Proteobacteria,1RQNF@1236|Gammaproteobacteria,1YFNJ@136841|Pseudomonas aeruginosa group	1236|Gammaproteobacteria	L	Elongator protein 3, MiaB family, Radical SAM	-	-	-	-	-	-	-	-	-	-	-	-	Radical_SAM
PALA52_00075	287.DR97_3030	5.39e-163	457.0	COG1136@1|root,COG1136@2|Bacteria,1RF77@1224|Proteobacteria,1SYCG@1236|Gammaproteobacteria,1YGQ9@136841|Pseudomonas aeruginosa group	1236|Gammaproteobacteria	V	ATPases associated with a variety of cellular activities	tagT	-	-	ko:K02003	-	M00258	-	-	ko00000,ko00002,ko02000	3.A.1	-	-	ABC_tran
PALA52_00094	287.DR97_3049	3.69e-59	182.0	2E7NP@1|root,32T01@2|Bacteria,1N5UY@1224|Proteobacteria	1224|Proteobacteria	-	-	-	-	-	-	-	-	-	-	-	-	-	-	-
PALA52_00100	287.DR97_3055	2.01e-243	669.0	COG0304@1|root,COG0304@2|Bacteria,1R618@1224|Proteobacteria,1S1M0@1236|Gammaproteobacteria,1YIZ4@136841|Pseudomonas aeruginosa group	1236|Gammaproteobacteria	M	synthase	-	-	2.3.1.41	ko:K00647	ko00061,ko00780,ko01100,ko01212,map00061,map00780,map01100,map01212	M00083,M00572	R04355,R04726,R04952,R04957,R04960,R04963,R04968,R07762,R10115,R10119	RC00039,RC02728,RC02729,RC02888	ko00000,ko00001,ko00002,ko01000,ko01004	-	-	-	-
PALA52_00101	287.DR97_3056	6.94e-283	772.0	COG1475@1|root,COG1475@2|Bacteria,1RIT4@1224|Proteobacteria,1SDFV@1236|Gammaproteobacteria	1236|Gammaproteobacteria	K	Domain of unknown function (DUF4150)	-	-	-	-	-	-	-	-	-	-	-	-	DUF4150,Tox-GHH2
PALA52_00102	287.DR97_3057	1.1e-234	644.0	COG4447@1|root,COG4447@2|Bacteria,1PK4D@1224|Proteobacteria,1TBR0@1236|Gammaproteobacteria,1YJXK@136841|Pseudomonas aeruginosa group	1236|Gammaproteobacteria	S	cellulose binding	-	-	-	-	-	-	-	-	-	-	-	-	-
PALA52_00103	287.DR97_3058	8.18e-282	772.0	COG1413@1|root,COG1413@2|Bacteria,1NUN2@1224|Proteobacteria,1RYE5@1236|Gammaproteobacteria,1YHQE@136841|Pseudomonas aeruginosa group	1236|Gammaproteobacteria	C	lyase activity	-	-	-	-	-	-	-	-	-	-	-	-	HEAT_2
PALA52_00123	287.DR97_3078	3.86e-154	435.0	COG1802@1|root,COG1802@2|Bacteria,1R96W@1224|Proteobacteria,1RS75@1236|Gammaproteobacteria,1YG0P@136841|Pseudomonas aeruginosa group	1236|Gammaproteobacteria	K	FCD	-	-	-	-	-	-	-	-	-	-	-	-	FCD,GntR
PALA52_00162	287.DR97_3118	2.59e-72	228.0	COG3203@1|root,COG3203@2|Bacteria,1R7Z2@1224|Proteobacteria,1RSP5@1236|Gammaproteobacteria	1236|Gammaproteobacteria	M	Outer membrane porin	opdC	-	-	-	-	-	-	-	-	-	-	-	OprD
PALA52_00179	287.DR97_3134	0.0	1038.0	COG0643@1|root,COG2198@1|root,COG0643@2|Bacteria,COG2198@2|Bacteria,1MUAG@1224|Proteobacteria,1RMS6@1236|Gammaproteobacteria,1YEY6@136841|Pseudomonas aeruginosa group	1236|Gammaproteobacteria	NT	Signal transducing histidine kinase, homodimeric domain	cheA	GO:0000160,GO:0003674,GO:0003824,GO:0004672,GO:0004673,GO:0005575,GO:0005622,GO:0005623,GO:0005737,GO:0005829,GO:0005886,GO:0006464,GO:0006468,GO:0006793,GO:0006796,GO:0006807,GO:0006935,GO:0007154,GO:0007165,GO:0008150,GO:0008152,GO:0009605,GO:0009892,GO:0009893,GO:0009987,GO:0010562,GO:0010604,GO:0010605,GO:0016020,GO:0016301,GO:0016310,GO:0016740,GO:0016772,GO:0016773,GO:0016775,GO:0018106,GO:…	2.7.13.3	ko:K03407	ko02020,ko02030,map02020,map02030	M00506	-	-	ko00000,ko00001,ko00002,ko01000,ko01001,ko02022,ko02035	-	-	-	CheW,CheY-binding,H-kinase_dim,HATPase_c,Hpt
PALA52_00181	287.DR97_3136	1.65e-251	693.0	COG0840@1|root,COG0840@2|Bacteria,1RBQH@1224|Proteobacteria,1S2V1@1236|Gammaproteobacteria,1YDMY@136841|Pseudomonas aeruginosa group	1236|Gammaproteobacteria	NT	Methyl-accepting chemotaxis-like domains (chemotaxis sensory transducer).	-	-	-	ko:K03406	ko02020,ko02030,map02020,map02030	-	-	-	ko00000,ko00001,ko02035	-	-	-	MCPsignal
PALA52_00191	237609.PSAKL28_42190	0.0	961.0	2DGHX@1|root,2ZW1U@2|Bacteria,1RAS7@1224|Proteobacteria,1S522@1236|Gammaproteobacteria	1236|Gammaproteobacteria	-	-	-	-	-	-	-	-	-	-	-	-	-	-	-
PALA52_00192	686578.AFFX01000005_gene4318	2.63e-79	249.0	2DFZ7@1|root,2ZTU6@2|Bacteria,1P48U@1224|Proteobacteria,1SUWK@1236|Gammaproteobacteria	1236|Gammaproteobacteria	S	Domain of unknown function (DUF4123)	-	-	-	-	-	-	-	-	-	-	-	-	DUF4123
PALA52_00193	287.DR97_2637	0.0	1132.0	COG3501@1|root,COG3501@2|Bacteria,1MU7Q@1224|Proteobacteria,1RMZS@1236|Gammaproteobacteria,1YICU@136841|Pseudomonas aeruginosa group	1236|Gammaproteobacteria	S	Phage late control gene D protein (GPD)	-	-	-	ko:K11904	ko03070,map03070	M00334	-	-	ko00000,ko00001,ko00002,ko02044	3.A.23.1	-	-	Phage_GPD
PALA52_00194	287.DR97_2638	3.45e-126	358.0	COG3157@1|root,COG3157@2|Bacteria,1MXFB@1224|Proteobacteria,1RNKQ@1236|Gammaproteobacteria,1YEKZ@136841|Pseudomonas aeruginosa group	1236|Gammaproteobacteria	S	Type VI secretion system effector, Hcp	hcp	-	-	ko:K11903	ko02025,ko03070,map02025,map03070	M00334	-	-	ko00000,ko00001,ko00002,ko02044	-	-	-	T6SS_HCP
PALA52_00198	287.DR97_3150	2.55e-216	597.0	COG2175@1|root,COG2175@2|Bacteria,1MVI6@1224|Proteobacteria,1S2DH@1236|Gammaproteobacteria,1YJ7H@136841|Pseudomonas aeruginosa group	1236|Gammaproteobacteria	Q	Taurine catabolism dioxygenase TauD, TfdA family	-	-	1.14.11.17	ko:K03119	ko00430,ko00920,map00430,map00920	-	R05320	RC01331	ko00000,ko00001,ko01000	-	-	-	TauD
PALA52_00207	287.DR97_3159	0.0	987.0	COG0154@1|root,COG0154@2|Bacteria,1MW3Z@1224|Proteobacteria,1RR6F@1236|Gammaproteobacteria,1YF7A@136841|Pseudomonas aeruginosa group	1236|Gammaproteobacteria	J	Amidase	-	-	3.5.1.4	ko:K01426	ko00330,ko00360,ko00380,ko00627,ko00643,ko01120,map00330,map00360,map00380,map00627,map00643,map01120	-	R02540,R03096,R03180,R03909,R05551,R05590	RC00010,RC00100,RC00950,RC01025	ko00000,ko00001,ko01000	-	-	-	Amidase
PALA52_00208	287.DR97_3160	3.12e-251	689.0	COG0687@1|root,COG0687@2|Bacteria,1MUYW@1224|Proteobacteria,1SP9X@1236|Gammaproteobacteria,1YFFP@136841|Pseudomonas aeruginosa group	1236|Gammaproteobacteria	E	Bacterial extracellular solute-binding protein	-	-	-	ko:K11069	ko02010,map02010	M00299	-	-	ko00000,ko00001,ko00002,ko02000	3.A.1.11.1	-	-	SBP_bac_8
PALA52_00209	287.DR97_3161	1.37e-180	504.0	COG1177@1|root,COG1177@2|Bacteria,1MVC5@1224|Proteobacteria,1RQB7@1236|Gammaproteobacteria,1YFKH@136841|Pseudomonas aeruginosa group	1236|Gammaproteobacteria	E	Binding-protein-dependent transport system inner membrane component	-	-	-	ko:K11070,ko:K11074	ko02010,map02010	M00299,M00300	-	-	ko00000,ko00001,ko00002,ko02000	3.A.1.11.1,3.A.1.11.2	-	-	BPD_transp_1
PALA52_00210	287.DR97_3162	7.18e-206	571.0	COG1176@1|root,COG1176@2|Bacteria,1MVGM@1224|Proteobacteria,1RNNZ@1236|Gammaproteobacteria,1YFGH@136841|Pseudomonas aeruginosa group	1236|Gammaproteobacteria	E	Binding-protein-dependent transport system inner membrane component	-	-	-	ko:K11071	ko02010,map02010	M00299	-	-	ko00000,ko00001,ko00002,ko02000	3.A.1.11.1	-	-	BPD_transp_1
PALA52_00211	287.DR97_3163	2.07e-260	714.0	COG3842@1|root,COG3842@2|Bacteria,1MU3I@1224|Proteobacteria,1RNPX@1236|Gammaproteobacteria,1YERM@136841|Pseudomonas aeruginosa group	1236|Gammaproteobacteria	E	Part of the ABC transporter complex PotABCD involved in spermidine putrescine import. Responsible for energy coupling to the transport system	potA	GO:0000166,GO:0003674,GO:0003824,GO:0005215,GO:0005488,GO:0005524,GO:0005575,GO:0005623,GO:0005886,GO:0006810,GO:0006811,GO:0006812,GO:0008144,GO:0008150,GO:0008324,GO:0008519,GO:0015075,GO:0015101,GO:0015203,GO:0015399,GO:0015405,GO:0015417,GO:0015595,GO:0015606,GO:0015695,GO:0015696,GO:0015846,GO:0015847,GO:0015848,GO:0016020,GO:0016021,GO:0016462,GO:0016787,GO:0016817,GO:0016818,GO:0016887,GO:…	3.6.3.31	ko:K02052,ko:K11072,ko:K11076	ko02010,ko02024,map02010,map02024	M00193,M00299,M00300	-	-	ko00000,ko00001,ko00002,ko01000,ko02000	3.A.1.11,3.A.1.11.1,3.A.1.11.2	-	iB21_1397.B21_01132,iECBD_1354.ECBD_2473,iECB_1328.ECB_01124,iECD_1391.ECD_01124,iECO111_1330.ECO111_1474,iECO26_1355.ECO26_1643,iEcHS_1320.EcHS_A1246,iEcolC_1368.EcolC_2477,iSBO_1134.SBO_1915,iSSON_1240.SSON_1144,iSbBS512_1146.SbBS512_E1304,iUMNK88_1353.UMNK88_1456	ABC_tran,TOBE_2
PALA52_00212	287.DR97_3164	1.26e-215	595.0	COG0583@1|root,COG0583@2|Bacteria,1MWY0@1224|Proteobacteria,1RP7Q@1236|Gammaproteobacteria,1YDG7@136841|Pseudomonas aeruginosa group	1236|Gammaproteobacteria	K	LysR substrate binding domain	-	-	-	ko:K03566	ko02026,map02026	-	-	-	ko00000,ko00001,ko03000	-	-	-	HTH_1,LysR_substrate
PALA52_00223	1437882.AZRU01000014_gene3231	3.8e-74	224.0	2E2XV@1|root,32XYR@2|Bacteria,1N0JU@1224|Proteobacteria,1SC47@1236|Gammaproteobacteria,1YJNJ@136841|Pseudomonas aeruginosa group	1236|Gammaproteobacteria	-	-	-	-	-	-	-	-	-	-	-	-	-	-	-
PALA52_00257	287.DR97_3208	3.46e-162	452.0	2EMUA@1|root,33FGN@2|Bacteria,1R7BJ@1224|Proteobacteria	1224|Proteobacteria	S	Suppressor of fused protein (SUFU)	-	-	-	-	-	-	-	-	-	-	-	-	SUFU
PALA52_00263	287.DR97_3215	1.89e-184	513.0	COG2801@1|root,COG2801@2|Bacteria,1PUMN@1224|Proteobacteria,1RYSS@1236|Gammaproteobacteria	1236|Gammaproteobacteria	L	PFAM Integrase catalytic region	-	-	-	ko:K07497	-	-	-	-	ko00000	-	-	-	HTH_21,rve,rve_3
PALA52_00264	1388763.O165_003985	1.14e-31	113.0	COG2963@1|root,COG2963@2|Bacteria,1RI5G@1224|Proteobacteria,1S8QB@1236|Gammaproteobacteria,1YZHK@136845|Pseudomonas putida group	1236|Gammaproteobacteria	L	Evidence 2b Function of strongly homologous gene	-	-	-	-	-	-	-	-	-	-	-	-	HTH_28
PALA52_00265	287.DR97_3217	0.0	882.0	28K59@1|root,2Z9TZ@2|Bacteria,1Q9K8@1224|Proteobacteria,1SKW0@1236|Gammaproteobacteria	1236|Gammaproteobacteria	S	Protein of unknown function (DUF2875)	-	-	-	-	-	-	-	-	-	-	-	-	DUF2875
PALA52_00266	587753.EY04_23945	0.0	1015.0	COG0596@1|root,COG0596@2|Bacteria,1MY2P@1224|Proteobacteria,1RQQM@1236|Gammaproteobacteria	1236|Gammaproteobacteria	D	nuclear chromosome segregation	-	-	-	-	-	-	-	-	-	-	-	-	Abhydrolase_8,DUF3274,DUF4150
PALA52_00268	287.DR97_3224	0.0	1472.0	COG3501@1|root,COG4253@1|root,COG3501@2|Bacteria,COG4253@2|Bacteria,1MU7Q@1224|Proteobacteria,1RN6G@1236|Gammaproteobacteria,1YI7R@136841|Pseudomonas aeruginosa group	1236|Gammaproteobacteria	S	Uncharacterized protein conserved in bacteria (DUF2345)	-	-	-	ko:K11904	ko03070,map03070	M00334	-	-	ko00000,ko00001,ko00002,ko02044	3.A.23.1	-	-	DUF2345,Phage_GPD,T6SS_Vgr
PALA52_00269	287.DR97_2638	3.45e-126	358.0	COG3157@1|root,COG3157@2|Bacteria,1MXFB@1224|Proteobacteria,1RNKQ@1236|Gammaproteobacteria,1YEKZ@136841|Pseudomonas aeruginosa group	1236|Gammaproteobacteria	S	Type VI secretion system effector, Hcp	hcp	-	-	ko:K11903	ko02025,ko03070,map02025,map03070	M00334	-	-	ko00000,ko00001,ko00002,ko02044	-	-	-	T6SS_HCP
PALA52_00337	287.DR97_3293	1.05e-147	418.0	COG0110@1|root,COG0110@2|Bacteria,1MUCJ@1224|Proteobacteria,1RPPT@1236|Gammaproteobacteria,1YH5J@136841|Pseudomonas aeruginosa group	1236|Gammaproteobacteria	S	Bacterial transferase hexapeptide (six repeats)	cat	-	2.3.1.28	ko:K00638,ko:K18234	-	-	-	-	br01600,ko00000,ko01000,ko01504	-	-	-	Hexapep
PALA52_00355	1042209.HK44_007540	6.16e-17	78.2	2B1V8@1|root,31UBA@2|Bacteria,1QS5V@1224|Proteobacteria,1RVHJ@1236|Gammaproteobacteria,1YU0Z@136843|Pseudomonas fluorescens group	1236|Gammaproteobacteria	-	-	-	-	-	-	-	-	-	-	-	-	-	-	-
PALA52_00369	287.DR97_3326	7.9e-168	476.0	COG0790@1|root,COG0790@2|Bacteria,1MWPA@1224|Proteobacteria,1RPI3@1236|Gammaproteobacteria,1YGPZ@136841|Pseudomonas aeruginosa group	1236|Gammaproteobacteria	S	Sel1-like repeats.	-	-	-	ko:K07126	-	-	-	-	ko00000	-	-	-	SH3_3,Sel1
PALA52_00423	287.DR97_3381	0.0	4390.0	COG0643@1|root,COG0784@1|root,COG2198@1|root,COG0643@2|Bacteria,COG0784@2|Bacteria,COG2198@2|Bacteria,1MUAG@1224|Proteobacteria,1RMS6@1236|Gammaproteobacteria,1YEZ2@136841|Pseudomonas aeruginosa group	1236|Gammaproteobacteria	T	Signal transducing histidine kinase, homodimeric domain	chpA	-	-	ko:K02487,ko:K06596	ko02020,ko02025,map02020,map02025	M00507	-	-	ko00000,ko00001,ko00002,ko01001,ko02022,ko02035	-	-	-	CheW,H-kinase_dim,HATPase_c,Hpt,Response_reg
PALA52_00440	287.DR97_3398	2.56e-205	568.0	COG0685@1|root,COG0685@2|Bacteria,1MUC9@1224|Proteobacteria,1RMXS@1236|Gammaproteobacteria,1YDSQ@136841|Pseudomonas aeruginosa group	1236|Gammaproteobacteria	E	Methylenetetrahydrofolate reductase	metF	GO:0000166,GO:0003674,GO:0003824,GO:0004489,GO:0005488,GO:0005575,GO:0005622,GO:0005623,GO:0005737,GO:0005829,GO:0006082,GO:0006575,GO:0006725,GO:0006730,GO:0006732,GO:0006760,GO:0006807,GO:0008150,GO:0008152,GO:0009058,GO:0009108,GO:0009396,GO:0009987,GO:0016043,GO:0016053,GO:0016491,GO:0016645,GO:0016646,GO:0018130,GO:0019438,GO:0019752,GO:0022607,GO:0034641,GO:0036094,GO:0042398,GO:0042558,GO:…	1.5.1.20	ko:K00297	ko00670,ko00720,ko01100,ko01120,ko01200,ko01523,map00670,map00720,map01100,map01120,map01200,map01523	M00377	R01224,R07168	RC00081	ko00000,ko00001,ko00002,ko01000	-	-	iPC815.YPO0117,iSBO_1134.SBO_3961	MTHFR
PALA52_00466	287.DR97_3423	2.43e-78	233.0	COG3339@1|root,COG3339@2|Bacteria,1MZCY@1224|Proteobacteria,1S8T6@1236|Gammaproteobacteria,1YK95@136841|Pseudomonas aeruginosa group	1236|Gammaproteobacteria	S	Protein of unknown function (DUF1232)	-	-	-	-	-	-	-	-	-	-	-	-	DUF1232
PALA52_00480	287.DR97_3438	0.0	1497.0	COG4773@1|root,COG4773@2|Bacteria,1QTT0@1224|Proteobacteria,1RNBT@1236|Gammaproteobacteria,1YE8E@136841|Pseudomonas aeruginosa group	1236|Gammaproteobacteria	P	receptor	fiuA	-	-	ko:K02014	-	-	-	-	ko00000,ko02000	1.B.14	-	-	Plug,TonB_dep_Rec
PALA52_00485	287.DR97_3443	5.13e-125	357.0	COG1309@1|root,COG1309@2|Bacteria,1N8IR@1224|Proteobacteria,1ST23@1236|Gammaproteobacteria,1YH6M@136841|Pseudomonas aeruginosa group	1236|Gammaproteobacteria	K	Bacterial regulatory proteins, tetR family	-	-	-	-	-	-	-	-	-	-	-	-	TetR_N
PALA52_00507	587753.EY04_18050	3.01e-122	361.0	COG3539@1|root,COG3539@2|Bacteria,1R9JR@1224|Proteobacteria,1RY0Z@1236|Gammaproteobacteria	1236|Gammaproteobacteria	NU	Fimbrial protein	-	-	-	-	-	-	-	-	-	-	-	-	Fimbrial
PALA52_00508	287.DR97_3467	3.08e-99	293.0	COG3121@1|root,COG3121@2|Bacteria	2|Bacteria	NU	pilus organization	-	-	-	ko:K07346	-	-	-	-	ko00000,ko02035,ko02044,ko03110	-	-	-	PapD_C,PapD_N
PALA52_00544	1240350.AMZE01000001_gene2865	1.03e-124	361.0	COG4705@1|root,COG4705@2|Bacteria,1MVMJ@1224|Proteobacteria,1S35X@1236|Gammaproteobacteria,1YUV0@136845|Pseudomonas putida group	1236|Gammaproteobacteria	S	Repeat of Unknown Function (DUF347)	-	-	-	-	-	-	-	-	-	-	-	-	DUF347
PALA52_00557	287.DR97_3215	7.71e-184	511.0	COG2801@1|root,COG2801@2|Bacteria,1PUMN@1224|Proteobacteria,1RYSS@1236|Gammaproteobacteria	1236|Gammaproteobacteria	L	PFAM Integrase catalytic region	-	-	-	ko:K07497	-	-	-	-	ko00000	-	-	-	HTH_21,rve,rve_3
PALA52_00558	1388763.O165_003985	1.14e-31	113.0	COG2963@1|root,COG2963@2|Bacteria,1RI5G@1224|Proteobacteria,1S8QB@1236|Gammaproteobacteria,1YZHK@136845|Pseudomonas putida group	1236|Gammaproteobacteria	L	Evidence 2b Function of strongly homologous gene	-	-	-	-	-	-	-	-	-	-	-	-	HTH_28
PALA52_00581	287.DR97_3537	4.85e-116	331.0	2DM71@1|root,31ZQF@2|Bacteria,1MYE2@1224|Proteobacteria,1SQNP@1236|Gammaproteobacteria	1236|Gammaproteobacteria	-	-	-	-	-	-	-	-	-	-	-	-	-	-	-
PALA52_00585	287.DR97_3542	6.25e-268	733.0	COG3177@1|root,COG3177@2|Bacteria,1MV69@1224|Proteobacteria,1RM9J@1236|Gammaproteobacteria,1YDHT@136841|Pseudomonas aeruginosa group	1236|Gammaproteobacteria	S	Domain of unknown function (DUF4172)	-	-	-	-	-	-	-	-	-	-	-	-	DUF4172,Fic
PALA52_00597	287.DR97_3554	5.09e-108	312.0	2AV1W@1|root,31KRR@2|Bacteria,1QE8W@1224|Proteobacteria,1TASP@1236|Gammaproteobacteria,1YGG4@136841|Pseudomonas aeruginosa group	1236|Gammaproteobacteria	S	Domain of unknown function (DUF4136)	-	-	-	-	-	-	-	-	-	-	-	-	DUF4136
PALA52_00607	287.DR97_3564	0.0	1771.0	COG1452@1|root,COG1452@2|Bacteria,1MUJC@1224|Proteobacteria,1RQEX@1236|Gammaproteobacteria,1YEAB@136841|Pseudomonas aeruginosa group	1236|Gammaproteobacteria	M	Together with LptE, is involved in the assembly of lipopolysaccharide (LPS) at the surface of the outer membrane	lptD	GO:0005575,GO:0005623,GO:0006810,GO:0006869,GO:0008150,GO:0009279,GO:0009636,GO:0009987,GO:0010876,GO:0015920,GO:0016020,GO:0016043,GO:0019867,GO:0022607,GO:0030312,GO:0030313,GO:0031975,GO:0033036,GO:0042221,GO:0043163,GO:0043165,GO:0044085,GO:0044091,GO:0044462,GO:0044464,GO:0045229,GO:0050896,GO:0051179,GO:0051234,GO:0061024,GO:0071702,GO:0071709,GO:0071840,GO:0071944,GO:1901264	-	ko:K04744	-	-	-	-	ko00000,ko02000	1.B.42.1	-	iG2583_1286.G2583_0058	OstA,OstA_C
PALA52_00630	1163398.AJJP01000172_gene939	5.71e-80	241.0	2DNA4@1|root,32WDI@2|Bacteria,1RH8K@1224|Proteobacteria,1S8YN@1236|Gammaproteobacteria	1236|Gammaproteobacteria	S	Phage tail tube, TTP, lambda-like	-	-	-	-	-	-	-	-	-	-	-	-	Phage_TTP_11
PALA52_00631	390235.PputW619_1346	2.85e-21	88.6	2DGY7@1|root,2ZXR3@2|Bacteria,1P7AW@1224|Proteobacteria	1224|Proteobacteria	S	Phage tail assembly chaperone, TAC	-	-	-	-	-	-	-	-	-	-	-	-	Phage_TAC_13
PALA52_00632	1439940.BAY1663_02352	2.53e-15	71.6	2DQXX@1|root,339A9@2|Bacteria,1NBJ3@1224|Proteobacteria,1SRKE@1236|Gammaproteobacteria	1236|Gammaproteobacteria	-	-	-	-	-	-	-	-	-	-	-	-	-	-	-
PALA52_00633	1437882.AZRU01000006_gene1540	5.88e-39	162.0	COG3941@1|root,COG5281@1|root,COG3941@2|Bacteria,COG5281@2|Bacteria,1QUCD@1224|Proteobacteria,1T5X7@1236|Gammaproteobacteria,1YHSQ@136841|Pseudomonas aeruginosa group	1236|Gammaproteobacteria	S	tape measure protein	-	-	-	-	-	-	-	-	-	-	-	-	-
PALA52_00634	384676.PSEEN4178	1.62e-29	109.0	COG4718@1|root,COG4718@2|Bacteria,1NAD8@1224|Proteobacteria,1S9P4@1236|Gammaproteobacteria	1236|Gammaproteobacteria	S	Minor tail	-	-	-	-	-	-	-	-	-	-	-	-	Phage_min_tail
PALA52_00635	267608.RSc1694	1.35e-90	273.0	COG4672@1|root,COG4672@2|Bacteria,1N0JB@1224|Proteobacteria,2VMSX@28216|Betaproteobacteria,1K4DJ@119060|Burkholderiaceae	28216|Betaproteobacteria	S	Phage minor tail protein L	-	-	-	-	-	-	-	-	-	-	-	-	Phage_tail_L
PALA52_00636	1357272.AVEO02000111_gene3563	1.88e-106	315.0	COG0791@1|root,COG1310@1|root,COG0791@2|Bacteria,COG1310@2|Bacteria,1N05J@1224|Proteobacteria,1RPP6@1236|Gammaproteobacteria	1236|Gammaproteobacteria	M	NLP P60 protein	-	-	-	-	-	-	-	-	-	-	-	-	NLPC_P60,Prok-JAB
PALA52_00637	211586.SO_2941	3.75e-67	211.0	COG4723@1|root,COG4723@2|Bacteria,1RD21@1224|Proteobacteria,1S1ZN@1236|Gammaproteobacteria	1236|Gammaproteobacteria	S	lambda tail assembly I	-	-	-	-	-	-	-	-	-	-	-	-	Lambda_tail_I
PALA52_00638	1437882.AZRU01000006_gene1546	0.0	1281.0	COG4733@1|root,COG4733@2|Bacteria,1PHV3@1224|Proteobacteria,1TCGF@1236|Gammaproteobacteria,1YKAZ@136841|Pseudomonas aeruginosa group	1236|Gammaproteobacteria	S	Domain of unknown function (DUF1983)	-	-	-	-	-	-	-	-	-	-	-	-	DUF1983
PALA52_00640	69328.PVLB_18670	1.38e-40	150.0	2DQ30@1|root,334J4@2|Bacteria,1QVFA@1224|Proteobacteria	1224|Proteobacteria	-	-	-	-	-	-	-	-	-	-	-	-	-	-	DUF2793
PALA52_00641	1288298.rosmuc_00463	4.38e-25	97.4	2E9B9@1|root,333J4@2|Bacteria,1N9FM@1224|Proteobacteria,2UGPB@28211|Alphaproteobacteria,46R7I@74030|Roseovarius	28211|Alphaproteobacteria	-	-	-	-	-	-	-	-	-	-	-	-	-	-	-
PALA52_00673	95619.PM1_0200570	2.62e-63	195.0	COG0690@1|root,COG0690@2|Bacteria,1RDI9@1224|Proteobacteria,1S3PA@1236|Gammaproteobacteria	1236|Gammaproteobacteria	U	Essential subunit of the Sec protein translocation channel SecYEG. Clamps together the 2 halves of SecY. May contact the channel plug during translocation	secE	GO:0002790,GO:0003674,GO:0005215,GO:0005575,GO:0005623,GO:0005886,GO:0005887,GO:0006605,GO:0006612,GO:0006613,GO:0006614,GO:0006616,GO:0006810,GO:0006886,GO:0008104,GO:0008150,GO:0008320,GO:0008565,GO:0009306,GO:0009987,GO:0015031,GO:0015833,GO:0016020,GO:0016021,GO:0016043,GO:0022857,GO:0022884,GO:0031224,GO:0031226,GO:0031522,GO:0032940,GO:0032978,GO:0032991,GO:0033036,GO:0033365,GO:0034613,GO:…	-	ko:K03073	ko02024,ko03060,ko03070,map02024,map03060,map03070	M00335	-	-	ko00000,ko00001,ko00002,ko02044	3.A.5.1,3.A.5.2	-	-	SecE
PALA52_00718	287.DR97_3680	0.0	947.0	COG1169@1|root,COG1169@2|Bacteria,1MVB7@1224|Proteobacteria,1RRBX@1236|Gammaproteobacteria	1236|Gammaproteobacteria	HQ	Isochorismate synthase	entC	GO:0000287,GO:0003674,GO:0003824,GO:0005488,GO:0006518,GO:0006725,GO:0006807,GO:0008150,GO:0008152,GO:0008909,GO:0009058,GO:0009237,GO:0009238,GO:0009239,GO:0009712,GO:0009713,GO:0009987,GO:0016853,GO:0016866,GO:0018130,GO:0018958,GO:0019184,GO:0019290,GO:0019438,GO:0019540,GO:0019748,GO:0034641,GO:0043043,GO:0043167,GO:0043169,GO:0043603,GO:0043604,GO:0044237,GO:0044249,GO:0044271,GO:0044550,GO:…	5.4.4.2	ko:K01851,ko:K02361	ko00130,ko01053,ko01100,ko01110,ko01130,map00130,map01053,map01100,map01110,map01130	M00116	R01717	RC00588	ko00000,ko00001,ko00002,ko01000	-	-	iEC55989_1330.EC55989_0585,iECIAI1_1343.ECIAI1_0577,iECO103_1326.ECO103_0601,iECO111_1330.ECO111_0623,iECO26_1355.ECO26_0668,iECW_1372.ECW_m0648,iEKO11_1354.EKO11_3272,iEcE24377_1341.EcE24377A_0613,iSbBS512_1146.SbBS512_E0495,iUMNK88_1353.UMNK88_626,iWFL_1372.ECW_m0648	Chorismate_bind
PALA52_00731	287.DR97_3693	3.3e-254	702.0	COG0477@1|root,COG2814@2|Bacteria,1QU96@1224|Proteobacteria,1S0EZ@1236|Gammaproteobacteria	1236|Gammaproteobacteria	EGP	Major facilitator superfamily	-	-	-	-	-	-	-	-	-	-	-	-	Acatn,MFS_1
PALA52_00733	287.DR97_3695	3.07e-159	445.0	COG0259@1|root,COG0259@2|Bacteria,1RJT8@1224|Proteobacteria,1S7ZD@1236|Gammaproteobacteria	1236|Gammaproteobacteria	H	Pyridoxine 5'-phosphate oxidase C-terminal dimerisation region	ehpE	-	1.10.3.16	ko:K20262	ko00405,ko01130,ko02024,map00405,map01130,map02024	M00835	R11490,R11491,R11492	RC03450,RC03451	ko00000,ko00001,ko00002,ko01000	-	-	-	PNP_phzG_C,Putative_PNPOx
PALA52_00734	287.DR97_3696	2.52e-201	557.0	COG0384@1|root,COG0384@2|Bacteria,1MUAS@1224|Proteobacteria,1S11P@1236|Gammaproteobacteria	1236|Gammaproteobacteria	S	Phenazine biosynthesis-like protein	-	-	5.3.3.17	ko:K06998	ko00405,ko01130,ko02024,map00405,map01130,map02024	M00835	-	-	ko00000,ko00001,ko00002,ko01000	-	-	-	PhzC-PhzF
PALA52_00735	287.DR97_3697	0.0	1217.0	COG0147@1|root,COG0512@1|root,COG0147@2|Bacteria,COG0512@2|Bacteria,1R3RU@1224|Proteobacteria,1RSHJ@1236|Gammaproteobacteria	1236|Gammaproteobacteria	EH	chorismate binding enzyme	ehpC	-	2.6.1.86	ko:K13063	ko00405,ko01130,ko02024,map00405,map01130,map02024	M00835	R08956	RC00010,RC02387	ko00000,ko00001,ko00002,ko01000	-	-	-	Chorismate_bind,GATase
PALA52_00737	287.DR97_3699	4.82e-295	805.0	COG3200@1|root,COG3200@2|Bacteria,1MUWF@1224|Proteobacteria,1RRMM@1236|Gammaproteobacteria,1YES6@136841|Pseudomonas aeruginosa group	1236|Gammaproteobacteria	E	phospho-2-dehydro-3-deoxyheptonate aldolase	phzC	-	2.5.1.54	ko:K01626	ko00400,ko01100,ko01110,ko01130,ko01230,ko02024,map00400,map01100,map01110,map01130,map01230,map02024	M00022	R01826	RC00435	ko00000,ko00001,ko00002,ko01000	-	-	-	DAHP_synth_2
PALA52_00738	287.DR97_3700	6.55e-126	357.0	COG3631@1|root,COG3631@2|Bacteria,1RF40@1224|Proteobacteria,1S3ZH@1236|Gammaproteobacteria	1236|Gammaproteobacteria	S	Phenazine biosynthesis protein A/B	phzB	-	-	ko:K20260	ko00405,ko01130,ko02024,map00405,map01130,map02024	M00835	R11493	RC03452	ko00000,ko00001,ko00002	-	-	-	PHZA_PHZB
PALA52_00755	95619.PM1_0213890	8.26e-301	827.0	COG1012@1|root,COG1012@2|Bacteria,1MU1V@1224|Proteobacteria,1RMBQ@1236|Gammaproteobacteria	1236|Gammaproteobacteria	C	belongs to the aldehyde dehydrogenase family	-	-	1.2.1.99	ko:K09472	ko00330,ko01100,map00330,map01100	M00136	R07417,R07418	RC00080	ko00000,ko00001,ko00002,ko01000	-	-	-	Aldedh
PALA52_00758	95619.PM1_0213905	3.03e-281	773.0	COG0665@1|root,COG0665@2|Bacteria,1MVGP@1224|Proteobacteria,1RNJ9@1236|Gammaproteobacteria	1236|Gammaproteobacteria	E	oxidoreductase	-	-	-	-	-	-	-	-	-	-	-	-	DAO
PALA52_00778	1005395.CSV86_13590	2.31e-67	208.0	COG0454@1|root,COG0456@2|Bacteria,1MZUT@1224|Proteobacteria,1S4BD@1236|Gammaproteobacteria,1YYNU@136845|Pseudomonas putida group	1236|Gammaproteobacteria	K	Acetyltransferase (GNAT) domain	-	-	-	-	-	-	-	-	-	-	-	-	Acetyltransf_1
PALA52_00782	266264.Rmet_1924	1.87e-119	347.0	COG1028@1|root,COG1028@2|Bacteria,1R3ZC@1224|Proteobacteria,2VMWV@28216|Betaproteobacteria,1K5NS@119060|Burkholderiaceae	28216|Betaproteobacteria	IQ	Enoyl-(Acyl carrier protein) reductase	-	-	-	-	-	-	-	-	-	-	-	-	adh_short_C2
PALA52_00791	69328.PVLB_22260	8.37e-238	656.0	COG1063@1|root,COG1063@2|Bacteria,1MV9A@1224|Proteobacteria,1RY4R@1236|Gammaproteobacteria	1236|Gammaproteobacteria	C	Dehydrogenase	adh	-	1.1.1.303,1.1.1.4	ko:K00004	ko00650,map00650	-	R02855,R02946,R10504	RC00205,RC00525	ko00000,ko00001,ko01000	-	-	-	ADH_N,ADH_N_assoc,ADH_zinc_N
PALA52_00792	1151127.KB906325_gene4691	2.24e-209	585.0	COG0508@1|root,COG0596@1|root,COG0508@2|Bacteria,COG0596@2|Bacteria,1NU1Q@1224|Proteobacteria,1RR0X@1236|Gammaproteobacteria,1YMBP@136843|Pseudomonas fluorescens group	1236|Gammaproteobacteria	C	Acetoin dehydrogenase E2 component, dihydrolipoamide acetyltransferase	acoC	-	2.3.1.12	ko:K00627	ko00010,ko00020,ko00620,ko01100,ko01110,ko01120,ko01130,ko01200,map00010,map00020,map00620,map01100,map01110,map01120,map01130,map01200	M00307	R00209,R02569	RC00004,RC02742,RC02857	br01601,ko00000,ko00001,ko00002,ko01000	-	-	-	Abhydrolase_1,Abhydrolase_6,Biotin_lipoyl
PALA52_00793	351746.Pput_0593	9.92e-223	616.0	COG0022@1|root,COG0022@2|Bacteria,1R8KB@1224|Proteobacteria,1RP3G@1236|Gammaproteobacteria	1236|Gammaproteobacteria	C	COG0022 Pyruvate 2-oxoglutarate dehydrogenase complex, dehydrogenase (E1) component, eukaryotic type, beta subunit	acoB	-	-	ko:K21417	-	-	-	-	ko00000,ko01000	-	-	-	Transket_pyr,Transketolase_C
PALA52_00794	220664.PFL_2170	5.26e-199	555.0	COG1071@1|root,COG1071@2|Bacteria,1MU5R@1224|Proteobacteria,1RWHU@1236|Gammaproteobacteria,1YNKH@136843|Pseudomonas fluorescens group	1236|Gammaproteobacteria	C	dehydrogenase, E1 component	acoA	-	-	ko:K21416	-	-	-	-	ko00000,ko01000	-	-	-	E1_dh
PALA52_00795	322710.Avin_41720	9.19e-191	536.0	COG1597@1|root,COG1597@2|Bacteria,1QV26@1224|Proteobacteria,1T2DC@1236|Gammaproteobacteria	1236|Gammaproteobacteria	I	ATP-NAD kinase	-	-	-	-	-	-	-	-	-	-	-	-	NAD_kinase
PALA52_00796	322710.Avin_41710	9.7e-140	400.0	COG1028@1|root,COG1028@2|Bacteria,1MVQW@1224|Proteobacteria,1RNY1@1236|Gammaproteobacteria	1236|Gammaproteobacteria	IQ	COG1028 Dehydrogenases with different specificities (related to short-chain alcohol dehydrogenases)	-	-	1.1.1.304,1.1.1.76	ko:K03366	ko00650,map00650	-	R02855,R02946,R03707,R09078,R10505	RC00205,RC00525	ko00000,ko00001,ko01000	-	-	-	adh_short,adh_short_C2
PALA52_00797	1124983.PFLCHA0_c22140	0.0	986.0	COG3284@1|root,COG3284@2|Bacteria,1NRG5@1224|Proteobacteria,1RQMR@1236|Gammaproteobacteria,1YNPR@136843|Pseudomonas fluorescens group	1236|Gammaproteobacteria	KQ	Bacterial regulatory protein, Fis family	acoR	-	-	ko:K21405	-	-	-	-	ko00000,ko03000	-	-	-	GAF,HTH_8,Sigma54_activat
PALA52_00805	1224136.AMFN01000005_gene1173	2.03e-28	105.0	2EPFQ@1|root,33H2D@2|Bacteria,1NP7B@1224|Proteobacteria,1SH8V@1236|Gammaproteobacteria	1236|Gammaproteobacteria	-	-	-	-	-	-	-	-	-	-	-	-	-	-	-
PALA52_00827	287.DR97_3754	0.0	1369.0	COG4251@1|root,COG4251@2|Bacteria,1NSQ1@1224|Proteobacteria,1RZSH@1236|Gammaproteobacteria,1YIKZ@136841|Pseudomonas aeruginosa group	1236|Gammaproteobacteria	T	Phytochrome region	bphP	-	-	-	-	-	-	-	-	-	-	-	GAF,HATPase_c,HisKA,PAS_2,PHY
PALA52_00828	287.DR97_3755	1.52e-129	369.0	COG3230@1|root,COG3230@2|Bacteria,1NEC4@1224|Proteobacteria,1TBA7@1236|Gammaproteobacteria,1YH5B@136841|Pseudomonas aeruginosa group	1236|Gammaproteobacteria	P	Heme oxygenase	-	-	-	-	-	-	-	-	-	-	-	-	Heme_oxygenase
PALA52_00837	160488.PP_2397	6.15e-32	120.0	COG3767@1|root,COG3767@2|Bacteria,1N1XK@1224|Proteobacteria,1SJ67@1236|Gammaproteobacteria,1YW58@136845|Pseudomonas putida group	1236|Gammaproteobacteria	S	EF-hand, calcium binding motif	-	-	-	-	-	-	-	-	-	-	-	-	EF-hand_5
PALA52_00838	1042876.PPS_1985	1.18e-148	424.0	COG3220@1|root,COG3220@2|Bacteria,1MURE@1224|Proteobacteria,1RQ9H@1236|Gammaproteobacteria,1YWAR@136845|Pseudomonas putida group	1236|Gammaproteobacteria	S	Belongs to the UPF0276 family	-	-	-	ko:K09930	-	-	-	-	ko00000	-	-	-	DUF692
PALA52_00839	1388763.O165_013145	7.03e-82	252.0	COG3219@1|root,COG3219@2|Bacteria,1R8C9@1224|Proteobacteria,1S23S@1236|Gammaproteobacteria,1YYE2@136845|Pseudomonas putida group	1236|Gammaproteobacteria	S	Putative DNA-binding domain	-	-	-	ko:K09929	-	-	-	-	ko00000	-	-	-	DUF2063
PALA52_00840	1388763.O165_013215	1.16e-80	243.0	COG2259@1|root,COG2259@2|Bacteria,1RDRZ@1224|Proteobacteria,1SA8P@1236|Gammaproteobacteria,1YWWN@136845|Pseudomonas putida group	1236|Gammaproteobacteria	S	DoxX	-	-	-	ko:K15977	-	-	-	-	ko00000	-	-	-	DoxX
PALA52_00841	1390370.O203_09930	2.67e-90	271.0	COG2717@1|root,COG2717@2|Bacteria,1R4CY@1224|Proteobacteria,1SJ59@1236|Gammaproteobacteria,1YJ9W@136841|Pseudomonas aeruginosa group	1236|Gammaproteobacteria	C	Part of the MsrPQ system that repairs oxidized periplasmic proteins containing methionine sulfoxide residues (Met-O), using respiratory chain electrons. Thus protects these proteins from oxidative-stress damage caused by reactive species of oxygen and chlorine generated by the host defense mechanisms. MsrPQ is essential for the maintenance of envelope integrity under bleach stress, rescuing a wid…	-	-	-	-	-	-	-	-	-	-	-	-	Ferric_reduct
PALA52_00842	237609.PSAKL28_28290	1.09e-213	601.0	COG0642@1|root,COG0642@2|Bacteria,1PA1G@1224|Proteobacteria,1RMX3@1236|Gammaproteobacteria	1236|Gammaproteobacteria	T	Histidine kinase	-	-	-	-	-	-	-	-	-	-	-	-	HAMP,HATPase_c
PALA52_00843	1042876.PPS_1990	5.97e-159	447.0	COG0745@1|root,COG0745@2|Bacteria,1MY3D@1224|Proteobacteria,1RPKN@1236|Gammaproteobacteria,1YW97@136845|Pseudomonas putida group	1236|Gammaproteobacteria	K	Two component transcriptional regulator, winged helix family	ompR_2	-	-	ko:K02483	-	-	-	-	ko00000,ko02022	-	-	-	Response_reg,Trans_reg_C
PALA52_00844	1437882.AZRU01000211_gene2512	3.53e-20	84.0	2ARMC@1|root,31GY0@2|Bacteria,1QEMC@1224|Proteobacteria,1TBDD@1236|Gammaproteobacteria,1YH8P@136841|Pseudomonas aeruginosa group	1236|Gammaproteobacteria	S	Protein of unknown function (DUF2790)	-	-	-	-	-	-	-	-	-	-	-	-	DUF2790
PALA52_00853	1218352.B597_005550	9.74e-206	576.0	COG4638@1|root,COG4638@2|Bacteria,1R5YF@1224|Proteobacteria,1S6NN@1236|Gammaproteobacteria,1Z4B2@136846|Pseudomonas stutzeri group	1236|Gammaproteobacteria	P	Rieske [2Fe-2S] domain	-	-	-	-	-	-	-	-	-	-	-	-	Rieske
PALA52_00854	1218352.B597_005555	2.94e-124	365.0	COG1018@1|root,COG1018@2|Bacteria,1MU6E@1224|Proteobacteria,1SXIW@1236|Gammaproteobacteria,1Z2ZX@136846|Pseudomonas stutzeri group	1224|Proteobacteria	C	Oxidoreductase NAD-binding domain	-	-	1.1.1.404	ko:K21607	ko00361,ko01100,ko01120,map00361,map01100,map01120	-	R11585	-	ko00000,ko00001,ko01000	-	-	-	FAD_binding_6,Fer2,NAD_binding_1
PALA52_00855	1218352.B597_005560	2.69e-114	335.0	COG2197@1|root,COG2197@2|Bacteria,1QAMX@1224|Proteobacteria	1224|Proteobacteria	K	PFAM regulatory protein LuxR	-	-	-	-	-	-	-	-	-	-	-	-	GerE
PALA52_00861	287.DR97_3780	2.82e-196	544.0	28MCI@1|root,2ZAQM@2|Bacteria,1MWK7@1224|Proteobacteria,1RQF7@1236|Gammaproteobacteria,1YF97@136841|Pseudomonas aeruginosa group	1236|Gammaproteobacteria	S	MoaF C-terminal domain	moaF	-	-	-	-	-	-	-	-	-	-	-	MoaF,MoaF_C
PALA52_00862	287.DR97_3781	5.43e-111	321.0	COG3539@1|root,COG3539@2|Bacteria,1NY97@1224|Proteobacteria	1224|Proteobacteria	NU	Type-1 fimbrial protein, A	cupB1	-	-	ko:K07345	ko05133,map05133	-	-	-	ko00000,ko00001,ko02035,ko02044	-	-	-	FimA
PALA52_00863	287.DR97_3782	1.25e-143	409.0	COG3121@1|root,COG3121@2|Bacteria,1NW9Q@1224|Proteobacteria,1TB1A@1236|Gammaproteobacteria,1YGVZ@136841|Pseudomonas aeruginosa group	1236|Gammaproteobacteria	NU	Pili assembly chaperone PapD, C-terminal domain	-	-	-	ko:K15540	-	-	-	-	ko00000	-	-	-	PapD_C,PapD_N
PALA52_00865	287.DR97_3784	6.78e-165	462.0	COG3121@1|root,COG3121@2|Bacteria,1NW9Q@1224|Proteobacteria,1TB1A@1236|Gammaproteobacteria,1YGVZ@136841|Pseudomonas aeruginosa group	1236|Gammaproteobacteria	NU	Pili assembly chaperone PapD, C-terminal domain	-	-	-	ko:K15540	-	-	-	-	ko00000	-	-	-	PapD_C,PapD_N
PALA52_00866	287.DR97_3785	0.0	1383.0	COG3210@1|root,COG3210@2|Bacteria,1MXIP@1224|Proteobacteria,1RSAX@1236|Gammaproteobacteria,1YHVZ@136841|Pseudomonas aeruginosa group	1236|Gammaproteobacteria	U	adhes_NPXG filamentous hemagglutinin family N-terminal domain protein	cupB5	-	-	-	-	-	-	-	-	-	-	-	ESPR,Glug,Haemagg_act
PALA52_00871	287.DR97_3790	3.72e-36	122.0	COG1476@1|root,COG1476@2|Bacteria,1PTIJ@1224|Proteobacteria,1T6E6@1236|Gammaproteobacteria,1YKE0@136841|Pseudomonas aeruginosa group	1236|Gammaproteobacteria	K	Helix-turn-helix XRE-family like proteins	-	-	-	ko:K07729	-	-	-	-	ko00000,ko03000	-	-	-	HTH_3
PALA52_00873	287.DR97_3793	3.47e-59	191.0	COG0500@1|root,COG0500@2|Bacteria,1NTAP@1224|Proteobacteria,1SSAH@1236|Gammaproteobacteria	1236|Gammaproteobacteria	Q	methyltransferase	-	-	-	-	-	-	-	-	-	-	-	-	Methyltransf_11
PALA52_00908	287.DR97_3215	7.71e-184	511.0	COG2801@1|root,COG2801@2|Bacteria,1PUMN@1224|Proteobacteria,1RYSS@1236|Gammaproteobacteria	1236|Gammaproteobacteria	L	PFAM Integrase catalytic region	-	-	-	ko:K07497	-	-	-	-	ko00000	-	-	-	HTH_21,rve,rve_3
PALA52_00909	1388763.O165_003985	1.14e-31	113.0	COG2963@1|root,COG2963@2|Bacteria,1RI5G@1224|Proteobacteria,1S8QB@1236|Gammaproteobacteria,1YZHK@136845|Pseudomonas putida group	1236|Gammaproteobacteria	L	Evidence 2b Function of strongly homologous gene	-	-	-	-	-	-	-	-	-	-	-	-	HTH_28
PALA52_00910	287.DR97_3827	1.8e-225	623.0	2DM5E@1|root,31SVN@2|Bacteria,1MYKR@1224|Proteobacteria,1SF2N@1236|Gammaproteobacteria,1YESB@136841|Pseudomonas aeruginosa group	1236|Gammaproteobacteria	S	Domain of unknown function (DUF4340)	-	-	-	-	-	-	-	-	-	-	-	-	DUF4340
PALA52_00934	287.DR97_3851	9.52e-206	593.0	COG4249@1|root,COG4642@1|root,COG4249@2|Bacteria,COG4642@2|Bacteria,1P07C@1224|Proteobacteria,1S26V@1236|Gammaproteobacteria,1YFIQ@136841|Pseudomonas aeruginosa group	1236|Gammaproteobacteria	S	Peptidase C13 family	-	-	-	-	-	-	-	-	-	-	-	-	MORN,Peptidase_C13
PALA52_00985	287.DR97_3903	6.1e-133	380.0	2DBDT@1|root,2Z8NY@2|Bacteria,1N7S2@1224|Proteobacteria,1RTZE@1236|Gammaproteobacteria,1YGWI@136841|Pseudomonas aeruginosa group	1236|Gammaproteobacteria	-	-	-	-	-	-	-	-	-	-	-	-	-	-	-
PALA52_00993	287.DR97_3910	2.67e-105	303.0	COG0346@1|root,COG0346@2|Bacteria,1RH4D@1224|Proteobacteria,1S6J6@1236|Gammaproteobacteria,1YGDQ@136841|Pseudomonas aeruginosa group	1236|Gammaproteobacteria	E	Glyoxalase/Bleomycin resistance protein/Dioxygenase superfamily	-	-	-	-	-	-	-	-	-	-	-	-	Glyoxalase
PALA52_00997	287.DR97_3914	2.72e-127	366.0	COG3416@1|root,COG3416@2|Bacteria,1P8CZ@1224|Proteobacteria,1S3YQ@1236|Gammaproteobacteria,1YG5G@136841|Pseudomonas aeruginosa group	1236|Gammaproteobacteria	S	Uncharacterized protein conserved in bacteria (DUF2076)	yba2	-	-	ko:K09945	-	-	-	-	ko00000	-	-	-	DUF2076
PALA52_01010	287.DR97_3927	3.34e-195	544.0	COG1960@1|root,COG1960@2|Bacteria,1MYT7@1224|Proteobacteria,1TBXK@1236|Gammaproteobacteria,1YJG7@136841|Pseudomonas aeruginosa group	1236|Gammaproteobacteria	I	Acyl-CoA dehydrogenase, N-terminal domain	-	-	-	-	-	-	-	-	-	-	-	-	Acyl-CoA_dh_N
PALA52_01026	287.DR97_3943	0.0	1290.0	COG3203@1|root,COG3203@2|Bacteria,1MXEB@1224|Proteobacteria,1RPY8@1236|Gammaproteobacteria,1YEK4@136841|Pseudomonas aeruginosa group	1236|Gammaproteobacteria	M	Protein of unknown function (DUF1302)	-	-	-	-	-	-	-	-	-	-	-	-	DUF1302
PALA52_01078	287.DR97_3995	0.0	1066.0	COG1140@1|root,COG1140@2|Bacteria,1MW9Q@1224|Proteobacteria,1RNMJ@1236|Gammaproteobacteria,1YFMA@136841|Pseudomonas aeruginosa group	1236|Gammaproteobacteria	C	Respiratory nitrate reductase beta C-terminal	narH	-	1.7.5.1	ko:K00371	ko00910,ko01120,ko02020,map00910,map01120,map02020	M00529,M00530,M00804	R00798,R01106,R09497	RC02812	ko00000,ko00001,ko00002,ko01000	5.A.3.1	-	-	Fer4_11,Nitr_red_bet_C
PALA52_01111	287.DR97_4031	1.07e-94	276.0	2APBA@1|root,31EDH@2|Bacteria,1RIDJ@1224|Proteobacteria,1S6VZ@1236|Gammaproteobacteria	1236|Gammaproteobacteria	S	Putative prokaryotic signal transducing protein	-	-	-	-	-	-	-	-	-	-	-	-	DUF2007
PALA52_01119	287.DR97_4039	1.17e-247	681.0	COG0795@1|root,COG0795@2|Bacteria,1MVW3@1224|Proteobacteria,1RM8H@1236|Gammaproteobacteria,1YDSV@136841|Pseudomonas aeruginosa group	1236|Gammaproteobacteria	S	Predicted permease YjgP/YjgQ family	lptG	-	-	ko:K11720	ko02010,map02010	M00320	-	-	ko00000,ko00001,ko00002,ko02000	1.B.42.1	-	-	YjgP_YjgQ
PALA52_01156	287.DR97_4078	2.2e-88	261.0	2E58V@1|root,33019@2|Bacteria,1RKE3@1224|Proteobacteria,1TBA8@1236|Gammaproteobacteria,1YH5F@136841|Pseudomonas aeruginosa group	1236|Gammaproteobacteria	S	Protein of unknown function (DUF2946)	-	-	-	-	-	-	-	-	-	-	-	-	DUF2946
PALA52_01180	216595.PFLU_4132	2.36e-216	625.0	COG1835@1|root,COG1835@2|Bacteria,1MV2W@1224|Proteobacteria,1RQS2@1236|Gammaproteobacteria,1YRQJ@136843|Pseudomonas fluorescens group	1236|Gammaproteobacteria	I	Acyltransferase family	-	-	-	-	-	-	-	-	-	-	-	-	Acyl_transf_3
PALA52_01184	287.DR97_4110	1.65e-128	366.0	COG3644@1|root,COG3644@2|Bacteria,1RK12@1224|Proteobacteria,1SAPY@1236|Gammaproteobacteria	1236|Gammaproteobacteria	S	Uncharacterized protein conserved in bacteria (DUF2239)	-	-	-	ko:K09965	-	-	-	-	ko00000	-	-	-	DUF2239
PALA52_01187	287.DR97_4113	1.31e-49	158.0	2B1ZD@1|root,31UFZ@2|Bacteria,1QEGW@1224|Proteobacteria,1TB6K@1236|Gammaproteobacteria,1YH17@136841|Pseudomonas aeruginosa group	1236|Gammaproteobacteria	S	Iron-binding zinc finger CDGSH type	-	-	-	-	-	-	-	-	-	-	-	-	zf-CDGSH
PALA52_01217	287.DR97_4143	3.48e-43	151.0	COG1506@1|root,COG1506@2|Bacteria	2|Bacteria	E	serine-type peptidase activity	-	-	-	-	-	-	-	-	-	-	-	-	Abhydrolase_6,Hydrolase_4,LIP,Peptidase_S9
PALA52_01230	287.DR97_4156	3.99e-68	207.0	2A16N@1|root,30PCP@2|Bacteria,1QEF4@1224|Proteobacteria,1TB46@1236|Gammaproteobacteria,1YGXS@136841|Pseudomonas aeruginosa group	1236|Gammaproteobacteria	-	-	-	-	-	-	-	-	-	-	-	-	-	-	-
PALA52_01233	287.DR97_4159	5.8e-259	714.0	COG0477@1|root,COG2814@2|Bacteria,1PMZ2@1224|Proteobacteria,1TCJP@1236|Gammaproteobacteria,1YKE3@136841|Pseudomonas aeruginosa group	1236|Gammaproteobacteria	EGP	Major Facilitator Superfamily	-	-	-	-	-	-	-	-	-	-	-	-	MFS_1
PALA52_01237	1149133.ppKF707_4252	1.6e-37	132.0	COG3149@1|root,COG3149@2|Bacteria	2|Bacteria	U	Involved in a type II secretion system (T2SS, formerly general secretion pathway, GSP) for the export of proteins	-	-	-	ko:K02462	ko03070,ko05111,map03070,map05111	M00331	-	-	ko00000,ko00001,ko00002,ko02044	3.A.15	-	-	T2SSM
PALA52_01238	1123020.AUIE01000003_gene669	1.2e-152	441.0	COG3297@1|root,COG3297@2|Bacteria,1NVVW@1224|Proteobacteria,1S01F@1236|Gammaproteobacteria,1YKX3@136841|Pseudomonas aeruginosa group	1236|Gammaproteobacteria	U	GspL periplasmic domain	gspL	GO:0002790,GO:0006810,GO:0008104,GO:0008150,GO:0009306,GO:0009987,GO:0015031,GO:0015833,GO:0032940,GO:0033036,GO:0042886,GO:0045184,GO:0046903,GO:0051179,GO:0051234,GO:0071702,GO:0071705	-	ko:K02461	ko03070,ko05111,map03070,map05111	M00331	-	-	ko00000,ko00001,ko00002,ko02044	3.A.15	-	-	GspL_C,T2SSL
PALA52_01239	1123020.AUIE01000003_gene670	3.49e-129	375.0	COG3156@1|root,COG3156@2|Bacteria,1RBNV@1224|Proteobacteria,1S5US@1236|Gammaproteobacteria,1YDBT@136841|Pseudomonas aeruginosa group	1236|Gammaproteobacteria	U	Type II secretion system (T2SS), protein K	-	-	-	ko:K02460	ko03070,ko05111,map03070,map05111	M00331	-	-	ko00000,ko00001,ko00002,ko02044	3.A.15	-	-	T2SSK
PALA52_01240	1123020.AUIE01000003_gene671	1.44e-90	270.0	COG4795@1|root,COG4795@2|Bacteria	2|Bacteria	U	General secretion pathway protein	gspJ	GO:0002790,GO:0006810,GO:0008104,GO:0008150,GO:0009306,GO:0009987,GO:0015031,GO:0015628,GO:0015833,GO:0032940,GO:0033036,GO:0042886,GO:0045184,GO:0046903,GO:0051179,GO:0051234,GO:0055085,GO:0071702,GO:0071705,GO:0071806,GO:0098776	-	ko:K02459	ko03070,ko05111,map03070,map05111	M00331	-	-	ko00000,ko00001,ko00002,ko02044	3.A.15	-	-	N_methyl,T2SSJ
PALA52_01241	1123020.AUIE01000003_gene672	4.6e-50	162.0	COG2165@1|root,COG2165@2|Bacteria,1N0EN@1224|Proteobacteria	1224|Proteobacteria	NU	Type II secretion system (T2SS), protein I	gspI	-	-	ko:K02458	ko03070,ko05111,map03070,map05111	M00331	-	-	ko00000,ko00001,ko00002,ko02044	3.A.15	-	-	N_methyl,T2SSI
PALA52_01242	1123020.AUIE01000003_gene673	1.83e-63	199.0	COG2165@1|root,COG2165@2|Bacteria	2|Bacteria	NU	general secretion pathway protein	gspH	-	-	ko:K02457,ko:K02650	ko02020,ko03070,ko05111,map02020,map03070,map05111	M00331	-	-	ko00000,ko00001,ko00002,ko02035,ko02044	3.A.15,3.A.15.2	-	-	GspH,N_methyl
PALA52_01243	1123020.AUIE01000003_gene674	3.23e-88	260.0	COG2165@1|root,COG2165@2|Bacteria,1RDX2@1224|Proteobacteria,1S3VS@1236|Gammaproteobacteria	1236|Gammaproteobacteria	U	General Secretion Pathway protein	gspG	-	-	ko:K02456	ko03070,ko05111,map03070,map05111	M00331	-	-	ko00000,ko00001,ko00002,ko02044	3.A.15	-	-	N_methyl,T2SSG
PALA52_01244	1123020.AUIE01000003_gene675	2.32e-214	600.0	COG1459@1|root,COG1459@2|Bacteria,1MV4U@1224|Proteobacteria,1RQ86@1236|Gammaproteobacteria,1YEY8@136841|Pseudomonas aeruginosa group	1236|Gammaproteobacteria	U	general secretion pathway protein	gspF	-	-	ko:K02455	ko03070,ko05111,map03070,map05111	M00331	-	-	ko00000,ko00001,ko00002,ko02044	3.A.15	-	-	T2SSF
PALA52_01245	1123020.AUIE01000003_gene676	3.95e-292	805.0	COG2804@1|root,COG2804@2|Bacteria,1MU7V@1224|Proteobacteria,1RMBS@1236|Gammaproteobacteria,1YDWX@136841|Pseudomonas aeruginosa group	1236|Gammaproteobacteria	NU	type II secretion system protein E	xcsE	-	-	ko:K02454	ko03070,ko05111,map03070,map05111	M00331	-	-	ko00000,ko00001,ko00002,ko02044	3.A.15	-	-	T2SSE,T2SSE_N
PALA52_01246	1123020.AUIE01000003_gene677	0.0	912.0	COG1450@1|root,COG1450@2|Bacteria,1MUUA@1224|Proteobacteria,1RPJS@1236|Gammaproteobacteria,1YD4B@136841|Pseudomonas aeruginosa group	1236|Gammaproteobacteria	NU	Bacterial type II and III secretion system protein	lspD	-	-	ko:K02453	ko03070,ko05111,map03070,map05111	M00331	-	-	ko00000,ko00001,ko00002,ko02044	3.A.15	-	-	SPOR,Secretin,Secretin_N
PALA52_01248	1123020.AUIE01000003_gene679	1.15e-71	220.0	COG3038@1|root,COG3038@2|Bacteria,1NDX9@1224|Proteobacteria,1T0UR@1236|Gammaproteobacteria	1236|Gammaproteobacteria	C	cytochrome b561	-	-	-	ko:K12262	-	-	-	-	ko00000	-	-	-	Ni_hydr_CYTB
PALA52_01249	1123020.AUIE01000003_gene680	9.02e-286	789.0	COG3397@1|root,COG3397@2|Bacteria,1MXNR@1224|Proteobacteria,1RQZB@1236|Gammaproteobacteria,1YK3A@136841|Pseudomonas aeruginosa group	1236|Gammaproteobacteria	S	Pfam:Chitin_bind_3	gbpA	GO:0003674,GO:0003824,GO:0004553,GO:0004568,GO:0005488,GO:0006022,GO:0006026,GO:0006030,GO:0006032,GO:0006040,GO:0006807,GO:0008061,GO:0008144,GO:0008150,GO:0008152,GO:0009056,GO:0009057,GO:0009987,GO:0016787,GO:0016798,GO:0017144,GO:0042737,GO:0043170,GO:0044237,GO:0044248,GO:0046348,GO:0071704,GO:0097367,GO:1901071,GO:1901072,GO:1901135,GO:1901136,GO:1901564,GO:1901565,GO:1901575	-	ko:K03933,ko:K21712	ko05110,map05110	-	-	-	ko00000,ko00001	-	AA10,CBM73	-	LPMO_10
PALA52_01250	587753.EY04_26155	0.0	1161.0	COG0642@1|root,COG2205@2|Bacteria,1NRP8@1224|Proteobacteria,1RQCU@1236|Gammaproteobacteria	1236|Gammaproteobacteria	T	Component of the Rcs signaling system, which controls transcription of numerous genes. RcsC functions as a membrane- associated protein kinase that phosphorylates RcsD in response to environmental signals. The phosphoryl group is then transferred to the response regulator RcsB	evgS	GO:0000155,GO:0000160,GO:0003674,GO:0003824,GO:0004672,GO:0004673,GO:0006464,GO:0006468,GO:0006793,GO:0006796,GO:0006807,GO:0007154,GO:0007165,GO:0008150,GO:0008152,GO:0009268,GO:0009628,GO:0009927,GO:0009987,GO:0010447,GO:0016301,GO:0016310,GO:0016740,GO:0016772,GO:0016773,GO:0016775,GO:0018106,GO:0018193,GO:0018202,GO:0019538,GO:0023014,GO:0023052,GO:0035556,GO:0036211,GO:0043170,GO:0043412,GO:…	2.7.13.3	ko:K07677,ko:K07679	ko02020,ko02026,ko05133,map02020,map02026,map05133	M00474,M00477	-	-	ko00000,ko00001,ko00002,ko01000,ko01001,ko02022	-	-	-	HATPase_c,HisKA,Hpt,PAS,PAS_3,PAS_4,Response_reg,SBP_bac_3
PALA52_01251	287.DR97_4163	5.57e-134	381.0	COG2197@1|root,COG2197@2|Bacteria,1MW84@1224|Proteobacteria,1SYCW@1236|Gammaproteobacteria,1YIZU@136841|Pseudomonas aeruginosa group	1236|Gammaproteobacteria	T	helix_turn_helix, Lux Regulon	-	-	-	ko:K07687	ko02020,ko02026,map02020,map02026	M00474	-	-	ko00000,ko00001,ko00002,ko02022	-	-	-	GerE,Response_reg
PALA52_01280	287.DR97_4193	7.81e-64	196.0	2ARDX@1|root,31GQ0@2|Bacteria,1QEDP@1224|Proteobacteria,1TB0P@1236|Gammaproteobacteria,1YGV0@136841|Pseudomonas aeruginosa group	1236|Gammaproteobacteria	-	-	-	-	-	-	-	-	-	-	-	-	-	-	-
PALA52_01295	287.DR97_4208	3.83e-211	586.0	2DM5E@1|root,31SVN@2|Bacteria,1MYKR@1224|Proteobacteria,1SF2N@1236|Gammaproteobacteria,1YESB@136841|Pseudomonas aeruginosa group	1236|Gammaproteobacteria	S	Domain of unknown function (DUF4340)	-	-	-	-	-	-	-	-	-	-	-	-	DUF4340
PALA52_01337	287.DR97_4312	1.9e-109	315.0	COG0245@1|root,COG0245@2|Bacteria,1MVHA@1224|Proteobacteria,1S3RQ@1236|Gammaproteobacteria,1YEPB@136841|Pseudomonas aeruginosa group	1236|Gammaproteobacteria	I	Involved in the biosynthesis of isopentenyl diphosphate (IPP) and dimethylallyl diphosphate (DMAPP), two major building blocks of isoprenoid compounds. Catalyzes the conversion of 4- diphosphocytidyl-2-C-methyl-D-erythritol 2-phosphate (CDP-ME2P) to 2-C-methyl-D-erythritol 2,4-cyclodiphosphate (ME-CPP) with a corresponding release of cytidine 5-monophosphate (CMP)	ispF	GO:0003674,GO:0003824,GO:0005488,GO:0005515,GO:0006732,GO:0006733,GO:0006743,GO:0006744,GO:0008150,GO:0008152,GO:0008270,GO:0008685,GO:0009058,GO:0009108,GO:0009987,GO:0016829,GO:0016849,GO:0030145,GO:0042180,GO:0042181,GO:0042802,GO:0043167,GO:0043169,GO:0044237,GO:0044249,GO:0044281,GO:0044283,GO:0046872,GO:0046914,GO:0051186,GO:0051188,GO:0071704,GO:1901576,GO:1901661,GO:1901663	4.6.1.12	ko:K01770	ko00900,ko01100,ko01110,ko01130,map00900,map01100,map01110,map01130	M00096	R05637	RC00002,RC01440	ko00000,ko00001,ko00002,ko01000	-	-	iPC815.YPO3360	YgbB
PALA52_01356	287.DR97_4331	1.93e-210	582.0	COG1176@1|root,COG1176@2|Bacteria,1MVGM@1224|Proteobacteria,1RNNZ@1236|Gammaproteobacteria,1YESP@136841|Pseudomonas aeruginosa group	1236|Gammaproteobacteria	P	Binding-protein-dependent transport system inner membrane component	-	-	-	ko:K11071	ko02010,map02010	M00299	-	-	ko00000,ko00001,ko00002,ko02000	3.A.1.11.1	-	-	BPD_transp_1
PALA52_01371	287.DR97_4345	3.89e-209	578.0	COG0583@1|root,COG0583@2|Bacteria,1MXRP@1224|Proteobacteria,1RZTU@1236|Gammaproteobacteria,1YIJH@136841|Pseudomonas aeruginosa group	1236|Gammaproteobacteria	K	LysR substrate binding domain	-	-	-	-	-	-	-	-	-	-	-	-	HTH_1,LysR_substrate
PALA52_01402	287.DR97_4377	6.95e-303	850.0	COG4104@1|root,COG4104@2|Bacteria,1PDQ0@1224|Proteobacteria,1RWKS@1236|Gammaproteobacteria,1YJWQ@136841|Pseudomonas aeruginosa group	2|Bacteria	S	S-type Pyocin	-	-	-	-	-	-	-	-	-	-	-	-	Cloacin,PAAR_motif,Pyocin_S
PALA52_01410	287.DR97_4385	2.43e-67	205.0	COG2076@1|root,COG2076@2|Bacteria,1N25R@1224|Proteobacteria,1S928@1236|Gammaproteobacteria	1236|Gammaproteobacteria	U	Translocates 4-amino-4-deoxy-L-arabinose- phosphoundecaprenol (alpha-L-Ara4N-phosphoundecaprenol) from the cytoplasmic to the periplasmic side of the inner membrane	arnE	GO:0005575,GO:0005623,GO:0005886,GO:0005887,GO:0006810,GO:0008150,GO:0016020,GO:0016021,GO:0031224,GO:0031226,GO:0044425,GO:0044459,GO:0044464,GO:0051179,GO:0051234,GO:0055085,GO:0071944	-	ko:K12962	ko01503,map01503	M00721	-	-	ko00000,ko00001,ko00002,ko01005,ko02000	2.A.7.22	-	-	EamA
PALA52_01426	287.DR97_4401	0.0	976.0	COG1215@1|root,COG1215@2|Bacteria,1NQ1J@1224|Proteobacteria,1RYM8@1236|Gammaproteobacteria,1YDEI@136841|Pseudomonas aeruginosa group	1236|Gammaproteobacteria	M	Glycosyl transferase family group 2	alg8	-	2.4.1.33	ko:K19290	ko00051,map00051	-	R08692	RC00005	ko00000,ko00001,ko01000,ko01003,ko02000	4.D.1.1.7,4.D.1.1.9	GT2	-	Glyco_tranf_2_3
PALA52_01432	743720.Psefu_3166	9.16e-28	102.0	2EJRP@1|root,33DGF@2|Bacteria,1NJMC@1224|Proteobacteria	1224|Proteobacteria	S	zinc-ribbon domain	-	-	-	-	-	-	-	-	-	-	-	-	UPF0547,zf-ribbon_3
PALA52_01445	287.DR97_4419	6.32e-242	669.0	COG0845@1|root,COG0845@2|Bacteria,1MU78@1224|Proteobacteria,1RMI7@1236|Gammaproteobacteria,1YEA2@136841|Pseudomonas aeruginosa group	1236|Gammaproteobacteria	M	Belongs to the membrane fusion protein (MFP) (TC 8.A.1) family	-	-	-	ko:K18298,ko:K19595	-	M00641,M00768,M00769	-	-	ko00000,ko00002,ko01504,ko02000	2.A.6.2.25,2.A.6.2.34,8.A.1	-	-	Biotin_lipoyl_2,HlyD_D23
PALA52_01448	287.DR97_4422	3.19e-33	115.0	COG2608@1|root,COG2608@2|Bacteria,1PUDA@1224|Proteobacteria,1SJIA@1236|Gammaproteobacteria	1236|Gammaproteobacteria	P	Heavy-metal-associated domain	-	-	-	ko:K07213	ko04978,map04978	-	-	-	ko00000,ko00001	-	-	-	HMA
PALA52_01471	287.DR97_4445	1.59e-143	404.0	COG3916@1|root,COG3916@2|Bacteria,1NAB4@1224|Proteobacteria,1SE9K@1236|Gammaproteobacteria	1236|Gammaproteobacteria	H	Acyl-homoserine-lactone synthase	phzI	-	2.3.1.184	ko:K13061,ko:K20250	ko00270,ko01100,ko02020,ko02024,ko02025,map00270,map01100,map02020,map02024,map02025	-	R08939,R08940	RC00021,RC00039	ko00000,ko00001,ko01000	-	-	-	Autoind_synth
PALA52_01472	287.DR97_4446	8.09e-193	535.0	COG0834@1|root,COG0834@2|Bacteria,1MWDK@1224|Proteobacteria,1RZMR@1236|Gammaproteobacteria	1236|Gammaproteobacteria	ET	Belongs to the bacterial solute-binding protein 3 family	pheC	-	4.2.1.51,4.2.1.91	ko:K01713	ko00400,ko01100,ko01110,ko01130,ko01230,map00400,map01100,map01110,map01130,map01230	M00024	R00691,R01373	RC00360	ko00000,ko00001,ko00002,ko01000	-	-	-	SBP_bac_3
PALA52_01487	287.DR97_4461	0.0	1154.0	COG0189@1|root,COG0454@1|root,COG0189@2|Bacteria,COG0456@2|Bacteria,1MVN2@1224|Proteobacteria,1RS1C@1236|Gammaproteobacteria,1YEX6@136841|Pseudomonas aeruginosa group	1236|Gammaproteobacteria	HJK	RimK-like ATP-grasp domain	cphA	-	-	-	-	-	-	-	-	-	-	-	Acetyltransf_1,RimK
PALA52_01496	287.DR97_4470	7.4e-41	134.0	2CJRP@1|root,33F8D@2|Bacteria,1NMNN@1224|Proteobacteria,1SGVS@1236|Gammaproteobacteria,1YGYH@136841|Pseudomonas aeruginosa group	1236|Gammaproteobacteria	-	-	-	-	-	-	-	-	-	-	-	-	-	-	-
PALA52_01542	287.DR97_4515	0.0	1067.0	COG4618@1|root,COG4618@2|Bacteria,1NTI5@1224|Proteobacteria,1T1HR@1236|Gammaproteobacteria,1YCYE@136841|Pseudomonas aeruginosa group	1236|Gammaproteobacteria	V	ABC transporter transmembrane region	hasD	-	-	ko:K06148,ko:K12536	ko02010,map02010	M00328	-	-	ko00000,ko00001,ko00002,ko02000,ko02044	3.A.1,3.A.1.110	-	-	ABC_membrane,ABC_tran
PALA52_01583	1453503.AU05_20240	1.15e-79	248.0	COG3209@1|root,COG3209@2|Bacteria,1N632@1224|Proteobacteria,1SS79@1236|Gammaproteobacteria,1YGN8@136841|Pseudomonas aeruginosa group	1236|Gammaproteobacteria	M	COG3209 Rhs family protein	-	-	-	-	-	-	-	-	-	-	-	-	RHS_repeat
PALA52_01584	287.DR97_4557	0.0	1314.0	COG3209@1|root,COG3209@2|Bacteria,1MVV1@1224|Proteobacteria,1RP75@1236|Gammaproteobacteria,1YFEJ@136841|Pseudomonas aeruginosa group	1236|Gammaproteobacteria	M	RHS Repeat	-	-	-	-	-	-	-	-	-	-	-	-	DUF11,RHS,RHS_repeat
PALA52_01585	1182590.BN5_03739	4.92e-78	255.0	COG2826@1|root,COG3385@1|root,COG2826@2|Bacteria,COG3385@2|Bacteria,1PQZT@1224|Proteobacteria,1TBQQ@1236|Gammaproteobacteria,1YIJZ@136841|Pseudomonas aeruginosa group	1236|Gammaproteobacteria	L	Transposase DDE domain	-	-	-	-	-	-	-	-	-	-	-	-	DDE_Tnp_1
PALA52_01586	205922.Pfl01_3518	7.28e-40	135.0	2BHY0@1|root,32C26@2|Bacteria,1QREH@1224|Proteobacteria,1RUDQ@1236|Gammaproteobacteria,1YQSE@136843|Pseudomonas fluorescens group	1236|Gammaproteobacteria	-	-	-	-	-	-	-	-	-	-	-	-	-	-	-
PALA52_01591	287.DR97_4565	3.86e-114	328.0	29DTM@1|root,300RH@2|Bacteria,1RE8V@1224|Proteobacteria,1S84H@1236|Gammaproteobacteria	1236|Gammaproteobacteria	S	AmiS/UreI family transporter	-	-	-	ko:K22112	-	-	-	-	ko00000,ko02000	1.A.29.1.1,1.A.29.1.2,1.A.29.1.6	-	-	AmiS_UreI
PALA52_01592	287.DR97_4566	1.11e-72	218.0	2DNI1@1|root,32XMJ@2|Bacteria,1N0CA@1224|Proteobacteria,1SQ38@1236|Gammaproteobacteria	1236|Gammaproteobacteria	S	Fucose-binding lectin II (PA-IIL)	-	-	-	ko:K20277	ko02024,map02024	-	-	-	ko00000,ko00001	-	-	-	PA-IIL
PALA52_01613	287.DR97_4587	0.0	994.0	COG3170@1|root,COG3170@2|Bacteria,1RDH8@1224|Proteobacteria,1RRAZ@1236|Gammaproteobacteria,1YDQT@136841|Pseudomonas aeruginosa group	1236|Gammaproteobacteria	NU	Tfp pilus assembly protein FimV	fimV	-	-	ko:K08086	-	-	-	-	ko00000	-	-	-	LysM
PALA52_01653	287.DR97_4626	3.23e-254	700.0	COG0477@1|root,COG2814@2|Bacteria,1NDEH@1224|Proteobacteria,1SYD1@1236|Gammaproteobacteria,1YIME@136841|Pseudomonas aeruginosa group	1236|Gammaproteobacteria	EGP	Sugar (and other) transporter	-	-	-	ko:K18567	-	-	-	-	ko00000,ko02000	2.A.1.2.25	-	-	MFS_1
PALA52_01673	287.DR97_4648	8.36e-174	484.0	COG3219@1|root,COG3219@2|Bacteria,1R8C9@1224|Proteobacteria,1S23S@1236|Gammaproteobacteria,1YEXA@136841|Pseudomonas aeruginosa group	1236|Gammaproteobacteria	S	Putative DNA-binding domain	-	-	-	ko:K09929	-	-	-	-	ko00000	-	-	-	DUF2063
PALA52_01675	287.DR97_4650	8.24e-306	835.0	COG3746@1|root,COG3746@2|Bacteria,1RG6T@1224|Proteobacteria,1S412@1236|Gammaproteobacteria,1YEHV@136841|Pseudomonas aeruginosa group	1236|Gammaproteobacteria	P	Phosphate-selective porin O and P	oprO	-	-	ko:K07221	-	-	-	-	ko00000,ko02000	1.B.5.1	-	-	Porin_O_P
PALA52_01698	287.DR97_4674	5.39e-54	170.0	COG1396@1|root,COG1396@2|Bacteria,1N2N8@1224|Proteobacteria,1SB0M@1236|Gammaproteobacteria,1YGZ1@136841|Pseudomonas aeruginosa group	1236|Gammaproteobacteria	K	Helix-turn-helix domain	-	-	-	-	-	-	-	-	-	-	-	-	HTH_3,HTH_31
PALA52_01736	287.DR97_4712	1.15e-151	426.0	COG1182@1|root,COG1182@2|Bacteria,1P59R@1224|Proteobacteria,1S337@1236|Gammaproteobacteria,1YFD5@136841|Pseudomonas aeruginosa group	1236|Gammaproteobacteria	C	Catalyzes the reductive cleavage of azo bond in aromatic azo compounds to the corresponding amines. Requires NADH, but not NADPH, as an electron donor for its activity	azoR	GO:0000166,GO:0003674,GO:0003824,GO:0005488,GO:0005575,GO:0005622,GO:0005623,GO:0005737,GO:0005829,GO:0006732,GO:0006950,GO:0006979,GO:0008081,GO:0008150,GO:0008152,GO:0008770,GO:0009058,GO:0009108,GO:0009987,GO:0010181,GO:0016491,GO:0016651,GO:0016655,GO:0016661,GO:0016787,GO:0016788,GO:0032553,GO:0036094,GO:0042578,GO:0043167,GO:0043168,GO:0044237,GO:0044249,GO:0044424,GO:0044444,GO:0044464,GO:…	-	ko:K01118	-	-	-	-	ko00000,ko01000	-	-	-	Flavodoxin_2
PALA52_01799	1323663.AROI01000007_gene2686	2.34e-16	75.1	COG5416@1|root,COG5416@2|Bacteria,1NGPH@1224|Proteobacteria,1SGDB@1236|Gammaproteobacteria	1236|Gammaproteobacteria	S	Lipopolysaccharide assembly protein A domain	-	-	-	ko:K08992	-	-	-	-	ko00000	-	-	-	LapA_dom
PALA52_01800	287.DR97_4776	7.85e-130	381.0	COG3765@1|root,COG3765@2|Bacteria,1PCII@1224|Proteobacteria,1SXKE@1236|Gammaproteobacteria,1YI7X@136841|Pseudomonas aeruginosa group	1236|Gammaproteobacteria	M	Chain length determinant protein	-	-	-	ko:K05789	-	-	-	-	ko00000,ko01005	-	-	-	Wzz
PALA52_01803	930166.CD58_08710	1.26e-241	671.0	COG0677@1|root,COG0677@2|Bacteria,1MUC6@1224|Proteobacteria,1RMX0@1236|Gammaproteobacteria	1236|Gammaproteobacteria	M	Belongs to the UDP-glucose GDP-mannose dehydrogenase family	wecC	GO:0000271,GO:0003674,GO:0003824,GO:0005575,GO:0005622,GO:0005623,GO:0005737,GO:0005829,GO:0005975,GO:0005976,GO:0008150,GO:0008152,GO:0009058,GO:0009059,GO:0009246,GO:0009987,GO:0016051,GO:0016491,GO:0016614,GO:0016616,GO:0033692,GO:0034637,GO:0034645,GO:0043170,GO:0044237,GO:0044238,GO:0044249,GO:0044260,GO:0044262,GO:0044264,GO:0044424,GO:0044444,GO:0044464,GO:0046378,GO:0055114,GO:0071704,GO:…	1.1.1.336	ko:K02472	ko00520,ko05111,map00520,map05111	-	R03317	RC00291	ko00000,ko00001,ko01000	-	-	iECSE_1348.ECSE_4070	UDPG_MGDP_dh,UDPG_MGDP_dh_C,UDPG_MGDP_dh_N
PALA52_01804	1217713.F993_03352	4.62e-99	308.0	COG2244@1|root,COG2244@2|Bacteria,1R6ME@1224|Proteobacteria,1S4F9@1236|Gammaproteobacteria	1236|Gammaproteobacteria	S	Polysaccharide biosynthesis protein	-	-	-	-	-	-	-	-	-	-	-	-	Polysacc_synt,Polysacc_synt_3,Polysacc_synt_C
PALA52_01806	523850.TON_1975	5e-10	65.1	COG1216@1|root,arCOG01383@2157|Archaea,2XUCM@28890|Euryarchaeota,243HF@183968|Thermococci	183968|Thermococci	M	Glycosyl transferase family 2	-	-	-	ko:K07011	-	-	-	-	ko00000	-	-	-	Glycos_transf_2
PALA52_01808	1114970.PSF113_1652	0.0	1150.0	COG0673@1|root,COG1063@1|root,COG0673@2|Bacteria,COG1063@2|Bacteria,1QV3S@1224|Proteobacteria,1RRI1@1236|Gammaproteobacteria	1236|Gammaproteobacteria	E	Dehydrogenase	ycjQ	-	-	-	-	-	-	-	-	-	-	-	ADH_N,ADH_zinc_N,GFO_IDH_MocA,GFO_IDH_MocA_C
PALA52_01809	85643.Tmz1t_1124	6.03e-262	738.0	COG5360@1|root,COG5360@2|Bacteria,1MZ5X@1224|Proteobacteria,2VX6D@28216|Betaproteobacteria	28216|Betaproteobacteria	S	Heparinase II	-	-	-	-	-	-	-	-	-	-	-	-	Hepar_II_III,Hepar_II_III_N
PALA52_01810	477228.YO5_00285	7.58e-244	675.0	COG0438@1|root,COG0438@2|Bacteria,1PG33@1224|Proteobacteria,1RXH7@1236|Gammaproteobacteria,1Z4AU@136846|Pseudomonas stutzeri group	1236|Gammaproteobacteria	M	Glycosyl transferases group 1	-	-	-	-	-	-	-	-	-	-	-	-	Glycos_transf_1
PALA52_01811	1439940.BAY1663_03585	2.29e-119	343.0	COG2148@1|root,COG2148@2|Bacteria,1MV6W@1224|Proteobacteria,1RMMN@1236|Gammaproteobacteria	1236|Gammaproteobacteria	M	COG2148 Sugar transferases involved in lipopolysaccharide synthesis	epsL	-	-	-	-	-	-	-	-	-	-	-	Bac_transf
PALA52_01812	477228.YO5_00275	1.21e-44	154.0	COG0110@1|root,COG0110@2|Bacteria,1MZ7U@1224|Proteobacteria,1S3R7@1236|Gammaproteobacteria	1236|Gammaproteobacteria	S	COG0110 Acetyltransferase (isoleucine patch superfamily)	-	-	-	-	-	-	-	-	-	-	-	-	Hexapep
PALA52_01813	1439940.BAY1663_03587	1.28e-108	323.0	COG0399@1|root,COG0399@2|Bacteria,1MUPN@1224|Proteobacteria,1RMCS@1236|Gammaproteobacteria	1236|Gammaproteobacteria	E	Belongs to the DegT DnrJ EryC1 family	per	-	-	-	-	-	-	-	-	-	-	-	DegT_DnrJ_EryC1
PALA52_01814	1279017.AQYJ01000018_gene783	3.55e-115	342.0	COG0472@1|root,COG0472@2|Bacteria,1MWYW@1224|Proteobacteria,1RNAP@1236|Gammaproteobacteria,46477@72275|Alteromonadaceae	1236|Gammaproteobacteria	M	Catalyzes the transfer of the GlcNAc-1-phosphate moiety from UDP-GlcNAc onto the carrier lipid undecaprenyl phosphate (C55-P), yielding GlcNAc-pyrophosphoryl-undecaprenyl (GlcNAc-PP- C55)	wbpL	-	-	ko:K13007	-	-	-	-	ko00000,ko01000,ko01003,ko01005	-	-	-	Glycos_transf_4
PALA52_01815	287.DR97_4787	2.03e-229	646.0	COG1086@1|root,COG1086@2|Bacteria,1MWKY@1224|Proteobacteria,1RNQ2@1236|Gammaproteobacteria,1YEHC@136841|Pseudomonas aeruginosa group	1236|Gammaproteobacteria	GM	Polysaccharide biosynthesis protein	wbpM	-	-	-	-	-	-	-	-	-	-	-	CoA_binding_3,Polysacc_synt_2
PALA52_01816	287.DR97_4787	1.97e-217	614.0	COG1086@1|root,COG1086@2|Bacteria,1MWKY@1224|Proteobacteria,1RNQ2@1236|Gammaproteobacteria,1YEHC@136841|Pseudomonas aeruginosa group	1236|Gammaproteobacteria	GM	Polysaccharide biosynthesis protein	wbpM	-	-	-	-	-	-	-	-	-	-	-	CoA_binding_3,Polysacc_synt_2
PALA52_01850	287.DR97_4823	1.62e-117	340.0	COG3147@1|root,COG3147@2|Bacteria,1NGE3@1224|Proteobacteria,1SCGC@1236|Gammaproteobacteria,1YG01@136841|Pseudomonas aeruginosa group	1236|Gammaproteobacteria	S	Sporulation related domain	dedD	-	-	ko:K03749	-	-	-	-	ko00000	-	-	-	SPOR
PALA52_01855	287.DR97_4828	0.0	1239.0	COG1450@1|root,COG1450@2|Bacteria,1MUUA@1224|Proteobacteria,1RPJS@1236|Gammaproteobacteria,1YD4B@136841|Pseudomonas aeruginosa group	1236|Gammaproteobacteria	NU	Bacterial type II and III secretion system protein	gspD	-	-	ko:K02453	ko03070,ko05111,map03070,map05111	M00331	-	-	ko00000,ko00001,ko00002,ko02044	3.A.15	-	-	SPOR,Secretin,Secretin_N
PALA52_01884	287.DR97_4856	5.02e-74	234.0	COG4447@1|root,COG4447@2|Bacteria,1RCNG@1224|Proteobacteria,1S1N2@1236|Gammaproteobacteria,1YEE8@136841|Pseudomonas aeruginosa group	1236|Gammaproteobacteria	S	Photosynthesis system II assembly factor YCF48	-	-	-	-	-	-	-	-	-	-	-	-	PSII_BNR
PALA52_01893	287.DR97_4865	5.37e-220	607.0	COG1721@1|root,COG1721@2|Bacteria,1Q7RR@1224|Proteobacteria,1RNNP@1236|Gammaproteobacteria,1YDGM@136841|Pseudomonas aeruginosa group	1236|Gammaproteobacteria	S	Protein of unknown function DUF58	IV02_10730	-	-	-	-	-	-	-	-	-	-	-	DUF58
PALA52_01897	287.DR97_4872	0.0	1879.0	COG3868@1|root,COG3868@2|Bacteria,1MXYK@1224|Proteobacteria,1RMK1@1236|Gammaproteobacteria,1YFEG@136841|Pseudomonas aeruginosa group	1236|Gammaproteobacteria	S	Glycoside-hydrolase family GH114	pelA	-	-	ko:K21006	ko02025,map02025	-	-	-	ko00000,ko00001	-	-	-	Glyco_hydro_114
PALA52_01916	287.DR97_4892	0.0	1324.0	COG0642@1|root,COG0784@1|root,COG2198@1|root,COG0784@2|Bacteria,COG2198@2|Bacteria,COG2205@2|Bacteria,1NRP8@1224|Proteobacteria	1224|Proteobacteria	T	Histidine kinase	bvgS1	-	2.7.13.3	ko:K07679	ko02020,ko05133,map02020,map05133	M00477	-	-	ko00000,ko00001,ko00002,ko01000,ko01001,ko02022	-	-	-	GAF_2,HATPase_c,HisKA,Hpt,PAS,PAS_3,PAS_4,Response_reg,SBP_bac_3
PALA52_01928	287.DR97_4904	0.0	946.0	COG1858@1|root,COG1858@2|Bacteria,1N4E1@1224|Proteobacteria,1RP99@1236|Gammaproteobacteria	1236|Gammaproteobacteria	C	Cytochrome c	hsc	-	-	-	-	-	-	-	-	-	-	-	-
PALA52_01934	287.DR97_4910	5.83e-251	688.0	COG2207@1|root,COG2207@2|Bacteria,1R7PM@1224|Proteobacteria,1RYYY@1236|Gammaproteobacteria,1YDV5@136841|Pseudomonas aeruginosa group	1236|Gammaproteobacteria	K	Arabinose-binding domain of AraC transcription regulator, N-term	-	-	-	-	-	-	-	-	-	-	-	-	Arabinose_bd,HTH_18
PALA52_02015	287.DR97_4992	1.22e-82	246.0	COG2073@1|root,COG2073@2|Bacteria,1RM18@1224|Proteobacteria,1TB7W@1236|Gammaproteobacteria,1YH2W@136841|Pseudomonas aeruginosa group	1236|Gammaproteobacteria	H	Cobalamin synthesis G C-terminus	-	-	3.7.1.12	ko:K02189	ko00860,ko01100,map00860,map01100	-	R07772	RC01545,RC02097	ko00000,ko00001,ko01000	-	-	-	CbiG_C
PALA52_02020	287.DR97_4997	1.97e-255	701.0	COG0722@1|root,COG0722@2|Bacteria,1MU5Q@1224|Proteobacteria,1RMAA@1236|Gammaproteobacteria,1YCVZ@136841|Pseudomonas aeruginosa group	1236|Gammaproteobacteria	E	Stereospecific condensation of phosphoenolpyruvate (PEP) and D-erythrose-4-phosphate (E4P) giving rise to 3-deoxy-D- arabino-heptulosonate-7-phosphate (DAHP)	aroF	-	2.5.1.54	ko:K01626	ko00400,ko01100,ko01110,ko01130,ko01230,ko02024,map00400,map01100,map01110,map01130,map01230,map02024	M00022	R01826	RC00435	ko00000,ko00001,ko00002,ko01000	-	-	-	DAHP_synth_1
PALA52_02031	287.DR97_5012	2.03e-127	364.0	COG1280@1|root,COG1280@2|Bacteria,1RD4I@1224|Proteobacteria,1RPRS@1236|Gammaproteobacteria,1YG1K@136841|Pseudomonas aeruginosa group	1236|Gammaproteobacteria	E	LysE type translocator	-	-	-	-	-	-	-	-	-	-	-	-	LysE
PALA52_02034	384676.PSEEN1830	3.69e-38	133.0	COG0454@1|root,COG0456@2|Bacteria,1RM2P@1224|Proteobacteria,1S7Q5@1236|Gammaproteobacteria	1236|Gammaproteobacteria	K	acetyltransferase	-	-	-	-	-	-	-	-	-	-	-	-	Acetyltransf_1
PALA52_02045	287.DR97_5026	2.27e-211	583.0	COG0491@1|root,COG0491@2|Bacteria,1MURA@1224|Proteobacteria,1RN27@1236|Gammaproteobacteria,1YDWM@136841|Pseudomonas aeruginosa group	1236|Gammaproteobacteria	S	Metallo-beta-lactamase superfamily	blh	-	-	-	-	-	-	-	-	-	-	-	Lactamase_B
PALA52_02099	287.DR97_5080	3.11e-118	339.0	COG1514@1|root,COG1514@2|Bacteria,1RDB2@1224|Proteobacteria,1SCZX@1236|Gammaproteobacteria,1YGPQ@136841|Pseudomonas aeruginosa group	1236|Gammaproteobacteria	J	Hydrolyzes RNA 2',3'-cyclic phosphodiester to an RNA 2'- phosphomonoester	ligT	GO:0003674,GO:0003824,GO:0004112,GO:0004113,GO:0008081,GO:0008452,GO:0008664,GO:0016787,GO:0016788,GO:0016874,GO:0016886,GO:0042578,GO:0140098	3.1.4.58	ko:K01975	-	-	-	-	ko00000,ko01000,ko03016	-	-	-	LigT_PEase
PALA52_02101	287.DR97_5082	7.28e-117	334.0	COG0782@1|root,COG0782@2|Bacteria,1RAP0@1224|Proteobacteria,1S40Q@1236|Gammaproteobacteria,1YETC@136841|Pseudomonas aeruginosa group	1236|Gammaproteobacteria	K	Necessary for efficient RNA polymerase transcription elongation past template-encoded arresting sites. The arresting sites in DNA have the property of trapping a certain fraction of elongating RNA polymerases that pass through, resulting in locked ternary complexes. Cleavage of the nascent transcript by cleavage factors such as GreA or GreB allows the resumption of elongation from the new 3'termi…	greB	-	-	ko:K04760	-	-	-	-	ko00000,ko03021	-	-	-	GreA_GreB,GreA_GreB_N
PALA52_02115	287.DR97_5096	1.35e-42	139.0	COG5457@1|root,COG5457@2|Bacteria,1NH01@1224|Proteobacteria,1STKI@1236|Gammaproteobacteria,1YH6I@136841|Pseudomonas aeruginosa group	1236|Gammaproteobacteria	S	Domain of unknown function (DUF1127)	-	-	-	-	-	-	-	-	-	-	-	-	DUF1127
PALA52_02126	287.DR97_5107	6.08e-225	619.0	COG0583@1|root,COG0583@2|Bacteria,1N663@1224|Proteobacteria,1RZH0@1236|Gammaproteobacteria,1YFBA@136841|Pseudomonas aeruginosa group	1236|Gammaproteobacteria	K	LysR substrate binding domain	yidZ	-	-	-	-	-	-	-	-	-	-	-	HTH_1,LysR_substrate
PALA52_02144	640512.BC1003_5525	3.39e-52	166.0	2BI4W@1|root,32CA3@2|Bacteria,1RHWB@1224|Proteobacteria,2W3HV@28216|Betaproteobacteria,1K8TW@119060|Burkholderiaceae	28216|Betaproteobacteria	S	Killing trait	-	-	-	-	-	-	-	-	-	-	-	-	RebB
PALA52_02145	246200.SPOA0399	2.11e-54	172.0	2BI4W@1|root,32CA3@2|Bacteria,1RHWB@1224|Proteobacteria,2UD2Y@28211|Alphaproteobacteria	28211|Alphaproteobacteria	S	Killing trait	-	-	-	-	-	-	-	-	-	-	-	-	RebB
PALA52_02146	640512.BC1003_5526	1e-37	136.0	2EMEU@1|root,33F3N@2|Bacteria,1NNH7@1224|Proteobacteria,2W4UQ@28216|Betaproteobacteria	28216|Betaproteobacteria	-	-	-	-	-	-	-	-	-	-	-	-	-	-	-
PALA52_02150	640512.BC1003_5527	3.56e-63	204.0	2AV2B@1|root,31KS6@2|Bacteria,1RKXZ@1224|Proteobacteria,2W2ZS@28216|Betaproteobacteria,1K9SX@119060|Burkholderiaceae	28216|Betaproteobacteria	-	-	-	-	-	-	-	-	-	-	-	-	-	-	-
PALA52_02151	640512.BC1003_5528	1.97e-34	119.0	2BI4W@1|root,30X7B@2|Bacteria,1PJ0V@1224|Proteobacteria,2W4V8@28216|Betaproteobacteria,1KES6@119060|Burkholderiaceae	28216|Betaproteobacteria	S	Killing trait	-	-	-	-	-	-	-	-	-	-	-	-	RebB
PALA52_02152	690597.JH730953_gene3137	1.82e-52	173.0	COG1595@1|root,COG1595@2|Bacteria,1RHKC@1224|Proteobacteria	1224|Proteobacteria	K	RNA polymerase	-	-	-	ko:K03088	-	-	-	-	ko00000,ko03021	-	-	-	Sigma70_r2,Sigma70_r4_2
PALA52_02153	640512.BC1003_5523	2.08e-73	230.0	COG0664@1|root,COG0664@2|Bacteria,1MYMT@1224|Proteobacteria,2VY8Z@28216|Betaproteobacteria,1KE3X@119060|Burkholderiaceae	28216|Betaproteobacteria	K	Cyclic nucleotide-monophosphate binding domain	-	-	-	-	-	-	-	-	-	-	-	-	HTH_Crp_2,cNMP_binding
PALA52_02181	287.DR97_5156	2.08e-82	244.0	2EDYI@1|root,337TC@2|Bacteria,1N70E@1224|Proteobacteria,1SRQ4@1236|Gammaproteobacteria	1236|Gammaproteobacteria	-	-	-	-	-	-	-	-	-	-	-	-	-	-	-
PALA52_02186	287.DR97_5161	2.92e-103	299.0	COG2203@1|root,COG2203@2|Bacteria,1RGKE@1224|Proteobacteria,1SYDA@1236|Gammaproteobacteria	1236|Gammaproteobacteria	T	GAF domain	-	-	-	-	-	-	-	-	-	-	-	-	-
PALA52_02187	287.DR97_5162	1.15e-43	142.0	COG3655@1|root,COG3655@2|Bacteria,1N6VH@1224|Proteobacteria,1SDAJ@1236|Gammaproteobacteria,1YK56@136841|Pseudomonas aeruginosa group	1236|Gammaproteobacteria	K	Cro/C1-type HTH DNA-binding domain	yozG	-	-	ko:K07727	-	-	-	-	ko00000,ko03000	-	-	-	HTH_26
PALA52_02189	287.DR97_5164	0.0	1155.0	COG4935@1|root,COG4935@2|Bacteria,1PH1W@1224|Proteobacteria,1RRYP@1236|Gammaproteobacteria,1YIGC@136841|Pseudomonas aeruginosa group	1236|Gammaproteobacteria	O	Metallo-peptidase family M12B Reprolysin-like	-	-	-	-	-	-	-	-	-	-	-	-	CBM_4_9,P_proprotein,Reprolysin_3,Reprolysin_4
PALA52_02191	717774.Marme_2115	1.72e-65	215.0	COG2207@1|root,COG2207@2|Bacteria,1RAAS@1224|Proteobacteria,1S2HQ@1236|Gammaproteobacteria	1236|Gammaproteobacteria	K	helix_turn_helix, arabinose operon control protein	-	-	-	ko:K02508	-	-	-	-	ko00000,ko03000	-	-	-	AraC_binding,HTH_18
PALA52_02192	1179778.PMM47T1_22737	1.24e-101	298.0	COG0655@1|root,COG0655@2|Bacteria,1MW7N@1224|Proteobacteria,1RPXM@1236|Gammaproteobacteria	1236|Gammaproteobacteria	S	NADPH-dependent FMN reductase	wrbA	-	1.6.5.2	ko:K03809	ko00130,ko01110,map00130,map01110	-	R02964,R03643,R03816	RC00819	ko00000,ko00001,ko01000	-	-	-	FMN_red,Flavodoxin_5
PALA52_02193	157783.LK03_05995	1.97e-117	343.0	COG1028@1|root,COG1028@2|Bacteria,1R6NY@1224|Proteobacteria,1S0VU@1236|Gammaproteobacteria	1236|Gammaproteobacteria	IQ	Acts on other 3-alpha-hydroxysteroids and on 9-, 11- and 15-hydroxyprostaglandin	-	-	-	-	-	-	-	-	-	-	-	-	adh_short_C2
PALA52_02204	287.DR97_5176	2.24e-34	117.0	2BGRF@1|root,32AQI@2|Bacteria,1QF5Q@1224|Proteobacteria,1TC8U@1236|Gammaproteobacteria,1YK2I@136841|Pseudomonas aeruginosa group	1236|Gammaproteobacteria	-	-	-	-	-	-	-	-	-	-	-	-	-	-	-
PALA52_02206	287.DR97_5178	9.93e-23	95.9	COG2199@1|root,COG2203@1|root,COG2203@2|Bacteria,COG3706@2|Bacteria,1R7HC@1224|Proteobacteria,1T1I4@1236|Gammaproteobacteria,1YERR@136841|Pseudomonas aeruginosa group	1236|Gammaproteobacteria	T	Domain present in phytochromes and cGMP-specific phosphodiesterases.	cyaA	-	-	-	-	-	-	-	-	-	-	-	GAF,GGDEF
PALA52_02232	287.DR97_5205	2.86e-59	184.0	2E8NG@1|root,332ZQ@2|Bacteria,1N87Y@1224|Proteobacteria,1SCJ8@1236|Gammaproteobacteria,1YH0H@136841|Pseudomonas aeruginosa group	1236|Gammaproteobacteria	-	-	-	-	-	-	-	-	-	-	-	-	-	-	-
PALA52_02237	287.DR97_5209	4.19e-184	510.0	COG2356@1|root,COG2356@2|Bacteria,1MXQM@1224|Proteobacteria,1RPX9@1236|Gammaproteobacteria,1YFPN@136841|Pseudomonas aeruginosa group	1236|Gammaproteobacteria	L	Endonuclease I	endA	GO:0003674,GO:0003824,GO:0004518,GO:0004519,GO:0004520,GO:0004536,GO:0005575,GO:0005576,GO:0005623,GO:0006139,GO:0006259,GO:0006308,GO:0006725,GO:0006807,GO:0008150,GO:0008152,GO:0009056,GO:0009057,GO:0009987,GO:0016787,GO:0016788,GO:0016888,GO:0016893,GO:0019439,GO:0034641,GO:0034655,GO:0042597,GO:0043170,GO:0044237,GO:0044238,GO:0044248,GO:0044260,GO:0044265,GO:0044270,GO:0044464,GO:0046483,GO:…	3.1.21.1	ko:K01150	-	-	-	-	ko00000,ko01000	-	-	-	Endonuclease_1
PALA52_02255	287.DR97_5229	1.56e-51	164.0	COG2963@1|root,COG2963@2|Bacteria,1N04F@1224|Proteobacteria,1S6GJ@1236|Gammaproteobacteria,1YJTK@136841|Pseudomonas aeruginosa group	1236|Gammaproteobacteria	L	Transposase	-	-	-	ko:K07483	-	-	-	-	ko00000	-	-	-	HTH_Tnp_1
PALA52_02256	440512.C211_23260	2.22e-311	850.0	COG3547@1|root,COG3547@2|Bacteria,1MUKH@1224|Proteobacteria,1RZTT@1236|Gammaproteobacteria	1236|Gammaproteobacteria	L	to GP 6723233	-	-	-	-	-	-	-	-	-	-	-	-	DEDD_Tnp_IS110,Transposase_20
PALA52_02257	287.DR97_5228	9.57e-125	359.0	COG2801@1|root,COG2801@2|Bacteria,1MVXQ@1224|Proteobacteria,1RPEW@1236|Gammaproteobacteria,1YJPN@136841|Pseudomonas aeruginosa group	1236|Gammaproteobacteria	L	HTH-like domain	-	-	-	ko:K07497	-	-	-	-	ko00000	-	-	-	HTH_21,rve
PALA52_02258	1007105.PT7_2838	6.49e-305	835.0	COG2826@1|root,COG2826@2|Bacteria,1PP49@1224|Proteobacteria,2VI0E@28216|Betaproteobacteria,3T83N@506|Alcaligenaceae	28216|Betaproteobacteria	L	Helix-turn-helix domain	-	-	-	-	-	-	-	-	-	-	-	-	HTH_38,rve
PALA52_02261	1524467.IV04_13250	2.67e-206	606.0	COG1404@1|root,COG1404@2|Bacteria,1MVE6@1224|Proteobacteria,1RPCA@1236|Gammaproteobacteria	1236|Gammaproteobacteria	O	Subtilase family	-	-	-	-	-	-	-	-	-	-	-	-	Peptidase_S8
PALA52_02262	883126.HMPREF9710_04861	1.12e-101	311.0	COG0464@1|root,COG0464@2|Bacteria,1MVVP@1224|Proteobacteria,2VIRQ@28216|Betaproteobacteria,474RX@75682|Oxalobacteraceae	28216|Betaproteobacteria	O	ATPase family associated with various cellular activities (AAA)	-	-	-	-	-	-	-	-	-	-	-	-	AAA
PALA52_02263	743720.Psefu_2158	1.28e-139	400.0	COG1432@1|root,COG1432@2|Bacteria,1MX5C@1224|Proteobacteria,1SMK9@1236|Gammaproteobacteria	1236|Gammaproteobacteria	S	OST-HTH/LOTUS domain	-	-	-	-	-	-	-	-	-	-	-	-	NYN,OST-HTH
PALA52_02264	1123519.PSJM300_10475	0.0	2678.0	COG0210@1|root,COG0514@1|root,COG0210@2|Bacteria,COG0514@2|Bacteria,1MVGG@1224|Proteobacteria,1RS89@1236|Gammaproteobacteria,1Z2EE@136846|Pseudomonas stutzeri group	1236|Gammaproteobacteria	L	ATP-dependent DNA helicase	recQ1	-	3.6.4.12	ko:K03654	ko03018,map03018	-	-	-	ko00000,ko00001,ko01000,ko03400	-	-	-	DEAD,Helicase_C,RecQ_Zn_bind
PALA52_02265	1211579.PP4_02980	1.6e-143	409.0	COG1351@1|root,COG1351@2|Bacteria,1R6TS@1224|Proteobacteria,1S3UM@1236|Gammaproteobacteria	1236|Gammaproteobacteria	H	Catalyzes the reductive methylation of 2'-deoxyuridine- 5'-monophosphate (dUMP) to 2'-deoxythymidine-5'-monophosphate (dTMP) while utilizing 5,10-methylenetetrahydrofolate (mTHF) as the methyl donor, and NADPH and FADH(2) as the reductant	thyX	-	2.1.1.148	ko:K03465	ko00240,ko00670,ko01100,map00240,map00670,map01100	-	R06613	RC00022,RC00332	ko00000,ko00001,ko01000	-	-	-	Thy1
PALA52_02267	1535287.JP74_10775	4.12e-141	404.0	28IYH@1|root,2Z8W7@2|Bacteria,1PDS3@1224|Proteobacteria,2U50V@28211|Alphaproteobacteria	28211|Alphaproteobacteria	S	Protein of unknown function (Hypoth_ymh)	-	-	-	-	-	-	-	-	-	-	-	-	Hypoth_Ymh
PALA52_02269	75379.Tint_3234	2.22e-139	408.0	COG2197@1|root,COG2197@2|Bacteria,1N33D@1224|Proteobacteria,2VXA3@28216|Betaproteobacteria	28216|Betaproteobacteria	KT	plasmid replicase	-	-	-	-	-	-	-	-	-	-	-	-	PriCT_1,Replicase
PALA52_02270	287.DR97_5228	1.41e-200	555.0	COG2801@1|root,COG2801@2|Bacteria,1MVXQ@1224|Proteobacteria,1RPEW@1236|Gammaproteobacteria,1YJPN@136841|Pseudomonas aeruginosa group	1236|Gammaproteobacteria	L	HTH-like domain	-	-	-	ko:K07497	-	-	-	-	ko00000	-	-	-	HTH_21,rve
PALA52_02271	287.DR97_5229	1.68e-61	189.0	COG2963@1|root,COG2963@2|Bacteria,1N04F@1224|Proteobacteria,1S6GJ@1236|Gammaproteobacteria,1YJTK@136841|Pseudomonas aeruginosa group	1236|Gammaproteobacteria	L	Transposase	-	-	-	ko:K07483	-	-	-	-	ko00000	-	-	-	HTH_Tnp_1
PALA52_02272	1453503.AU05_14920	9.65e-52	166.0	COG1694@1|root,COG1694@2|Bacteria,1N02D@1224|Proteobacteria,1SC23@1236|Gammaproteobacteria,1YK28@136841|Pseudomonas aeruginosa group	1236|Gammaproteobacteria	S	MazG-like family	-	-	-	-	-	-	-	-	-	-	-	-	MazG-like
PALA52_02273	287.DR97_5230	6e-29	104.0	2DG12@1|root,2ZU0S@2|Bacteria,1P5G0@1224|Proteobacteria,1STVP@1236|Gammaproteobacteria	1236|Gammaproteobacteria	-	-	-	-	-	ko:K19048	-	-	-	-	ko00000,ko02048	-	-	-	SymE_toxin
PALA52_02274	287.DR97_5231	6.17e-286	785.0	2CM08@1|root,2ZB34@2|Bacteria,1R4FH@1224|Proteobacteria,1S3H2@1236|Gammaproteobacteria	1236|Gammaproteobacteria	-	-	-	-	-	-	-	-	-	-	-	-	-	-	-
PALA52_02278	287.DR97_5235	3.95e-115	331.0	2F2RS@1|root,33VN1@2|Bacteria,1NVMH@1224|Proteobacteria	1224|Proteobacteria	-	-	-	-	-	-	-	-	-	-	-	-	-	-	-
PALA52_02299	1357275.AVEL02000011_gene3743	7.05e-24	92.0	2E5I8@1|root,3309K@2|Bacteria,1P2Q4@1224|Proteobacteria,1T0YV@1236|Gammaproteobacteria	1236|Gammaproteobacteria	-	-	-	-	-	-	-	-	-	-	-	-	-	-	-
PALA52_02315	287.DR97_5272	0.0	870.0	COG0642@1|root,COG2205@2|Bacteria,1MUAK@1224|Proteobacteria,1RP7B@1236|Gammaproteobacteria,1YHYR@136841|Pseudomonas aeruginosa group	1236|Gammaproteobacteria	T	Sensor domain of 2-component histidine kinase	pfeS	-	2.7.13.3	ko:K19609	ko02020,map02020	M00770	-	-	ko00000,ko00001,ko00002,ko01000,ko01001,ko02022	-	-	-	HAMP,HATPase_c,HK_sensor,HisKA
PALA52_02320	95619.PM1_0223625	3.96e-140	399.0	COG1802@1|root,COG1802@2|Bacteria,1P945@1224|Proteobacteria,1S3F6@1236|Gammaproteobacteria	1236|Gammaproteobacteria	K	FCD	-	-	-	-	-	-	-	-	-	-	-	-	FCD,GntR
PALA52_02321	95619.PM1_0223630	2.55e-223	618.0	COG3938@1|root,COG3938@2|Bacteria,1N02K@1224|Proteobacteria,1RYRX@1236|Gammaproteobacteria	1236|Gammaproteobacteria	E	Belongs to the proline racemase family	-	-	-	-	-	-	-	-	-	-	-	-	Pro_racemase
PALA52_02322	95619.PM1_0223635	0.0	917.0	COG1012@1|root,COG1012@2|Bacteria,1MU1V@1224|Proteobacteria,1RMBQ@1236|Gammaproteobacteria	1236|Gammaproteobacteria	C	belongs to the aldehyde dehydrogenase family	-	-	1.2.1.8	ko:K00130	ko00260,ko01100,map00260,map01100	M00555	R02565,R02566	RC00080	ko00000,ko00001,ko00002,ko01000	-	-	-	Aldedh
PALA52_02323	95619.PM1_0223640	1.31e-273	752.0	COG0665@1|root,COG0665@2|Bacteria,1MVIZ@1224|Proteobacteria,1RQ50@1236|Gammaproteobacteria	1236|Gammaproteobacteria	E	Oxidative deamination of D-amino acids	-	-	1.4.5.1	ko:K00285	ko00360,map00360	-	R01374,R09493	RC00006,RC00025	ko00000,ko00001,ko01000	-	-	-	DAO
PALA52_02324	95619.PM1_0223645	3.18e-209	583.0	COG3938@1|root,COG3938@2|Bacteria,1NVF9@1224|Proteobacteria,1RRCW@1236|Gammaproteobacteria	1236|Gammaproteobacteria	E	Belongs to the proline racemase family	-	GO:0003674,GO:0003824,GO:0016853,GO:0016854,GO:0016855,GO:0036361,GO:0047580,GO:0047661	5.1.1.8	ko:K12658	ko00330,map00330	-	R03296	RC00479	ko00000,ko00001,ko01000	-	-	-	Pro_racemase
PALA52_02325	95619.PM1_0223650	1.69e-181	508.0	COG0329@1|root,COG0329@2|Bacteria,1MXI1@1224|Proteobacteria,1RRFC@1236|Gammaproteobacteria	1236|Gammaproteobacteria	EM	Belongs to the DapA family	-	-	4.3.3.7	ko:K01714	ko00261,ko00300,ko01100,ko01110,ko01120,ko01130,ko01230,map00261,map00300,map01100,map01110,map01120,map01130,map01230	M00016,M00525,M00526,M00527	R10147	RC03062,RC03063	ko00000,ko00001,ko00002,ko01000	-	-	-	DHDPS
PALA52_02326	95619.PM1_0223655	2.3e-130	373.0	COG0765@1|root,COG0765@2|Bacteria,1R7Z6@1224|Proteobacteria,1SYSS@1236|Gammaproteobacteria	1236|Gammaproteobacteria	E	Binding-protein-dependent transport system inner membrane component	-	-	-	-	-	-	-	-	-	-	-	-	BPD_transp_1
PALA52_02327	95619.PM1_0223660	6.72e-140	397.0	COG0765@1|root,COG0765@2|Bacteria,1R3RW@1224|Proteobacteria,1SYST@1236|Gammaproteobacteria	1236|Gammaproteobacteria	E	Binding-protein-dependent transport system inner membrane component	-	-	-	-	-	-	-	-	-	-	-	-	BPD_transp_1
PALA52_02328	95619.PM1_0223665	1.31e-164	464.0	COG1126@1|root,COG1126@2|Bacteria,1R503@1224|Proteobacteria,1SM0D@1236|Gammaproteobacteria	1236|Gammaproteobacteria	E	ATPases associated with a variety of cellular activities	-	-	-	-	-	-	-	-	-	-	-	-	ABC_tran
PALA52_02329	95619.PM1_0223670	1.66e-168	474.0	COG0834@1|root,COG0834@2|Bacteria,1NQZI@1224|Proteobacteria,1SYSU@1236|Gammaproteobacteria	1236|Gammaproteobacteria	ET	Bacterial periplasmic substrate-binding proteins	-	-	-	-	-	-	-	-	-	-	-	-	SBP_bac_3
PALA52_02339	287.DR97_5286	1.37e-83	248.0	2EDW5@1|root,337RA@2|Bacteria,1N9KH@1224|Proteobacteria,1SDZH@1236|Gammaproteobacteria	1236|Gammaproteobacteria	-	-	-	-	-	ko:K02456	ko03070,ko05111,map03070,map05111	M00331	-	-	ko00000,ko00001,ko00002,ko02044	3.A.15	-	-	N_methyl
PALA52_02340	287.DR97_5287	1.49e-87	258.0	COG4967@1|root,COG4967@2|Bacteria,1NJ3V@1224|Proteobacteria,1SGEX@1236|Gammaproteobacteria	1236|Gammaproteobacteria	NU	Prokaryotic N-terminal methylation motif	-	-	-	ko:K02458	ko03070,ko05111,map03070,map05111	M00331	-	-	ko00000,ko00001,ko00002,ko02044	3.A.15	-	-	N_methyl
PALA52_02341	287.DR97_5288	7.48e-126	359.0	COG2165@1|root,COG2165@2|Bacteria	2|Bacteria	NU	general secretion pathway protein	gspJ	-	-	ko:K02456,ko:K02457,ko:K02458,ko:K02459,ko:K02650	ko02020,ko03070,ko05111,map02020,map03070,map05111	M00331	-	-	ko00000,ko00001,ko00002,ko02035,ko02044	3.A.15,3.A.15.2	-	-	N_methyl,T2SSG
PALA52_02342	287.DR97_5289	4.9e-242	667.0	COG3156@1|root,COG3156@2|Bacteria	2|Bacteria	U	protein secretion	-	-	-	ko:K02460	ko03070,ko05111,map03070,map05111	M00331	-	-	ko00000,ko00001,ko00002,ko02044	3.A.15	-	-	T2SSK
PALA52_02343	95619.PM1_0209460	4.14e-33	125.0	2DRBX@1|root,33B5J@2|Bacteria,1NK8Z@1224|Proteobacteria,1SI1J@1236|Gammaproteobacteria	1236|Gammaproteobacteria	-	-	-	-	-	-	-	-	-	-	-	-	-	-	-
PALA52_02344	287.DR97_5291	1.56e-117	338.0	294V2@1|root,2ZS86@2|Bacteria,1P9RS@1224|Proteobacteria,1STKS@1236|Gammaproteobacteria	1236|Gammaproteobacteria	-	-	-	-	-	-	-	-	-	-	-	-	-	-	T2SSM_b
PALA52_02364	287.DR97_5311	0.0	929.0	COG1690@1|root,COG1690@2|Bacteria,1Q1SR@1224|Proteobacteria,1SZV8@1236|Gammaproteobacteria	1236|Gammaproteobacteria	S	tRNA-splicing ligase RtcB	rtcB	-	6.5.1.3	ko:K14415	-	-	-	-	ko00000,ko01000,ko03016	-	-	-	RtcB
PALA52_02412	287.DR97_5433	3.99e-97	290.0	COG0715@1|root,COG0715@2|Bacteria,1MV9S@1224|Proteobacteria,1S0U9@1236|Gammaproteobacteria,1YDY6@136841|Pseudomonas aeruginosa group	1236|Gammaproteobacteria	P	ABC transporter	-	-	-	ko:K15553	ko00920,ko02010,map00920,map02010	M00436	-	-	ko00000,ko00001,ko00002,ko02000	3.A.1.17.2	-	-	NMT1
PALA52_02413	287.DR97_5434	4.24e-247	679.0	COG3424@1|root,COG3424@2|Bacteria,1MUDX@1224|Proteobacteria,1S1SQ@1236|Gammaproteobacteria	1236|Gammaproteobacteria	Q	synthase	phlD	-	2.3.1.233,2.3.1.246,2.3.1.253	ko:K15431,ko:K16424,ko:K19580	ko01055,ko01130,map01055,map01130	-	R06625,R10965,R10967	RC00004,RC02933,RC03463	ko00000,ko00001,ko01000,ko01008	-	-	-	Chal_sti_synt_C,Chal_sti_synt_N
PALA52_02414	287.DR97_5435	0.0	1006.0	COG0644@1|root,COG0644@2|Bacteria,1MZVI@1224|Proteobacteria,1RMNS@1236|Gammaproteobacteria	1236|Gammaproteobacteria	C	oxidoreductase	pltM	-	1.14.19.49	ko:K14257	ko00253,ko00404,ko01057,ko01130,map00253,map00404,map01057,map01130	M00790,M00823	R05456,R11106,R11478	RC00949	ko00000,ko00001,ko00002,ko01000	-	-	-	Trp_halogenase
PALA52_02415	287.DR97_5436	6.57e-226	623.0	COG0583@1|root,COG0583@2|Bacteria,1R4CW@1224|Proteobacteria,1RZQ5@1236|Gammaproteobacteria,1YKS6@136841|Pseudomonas aeruginosa group	1236|Gammaproteobacteria	K	LysR substrate binding domain	-	-	-	-	-	-	-	-	-	-	-	-	HTH_1,LysR_substrate
PALA52_02416	287.DR97_5437	5.65e-58	179.0	COG0236@1|root,COG0236@2|Bacteria	2|Bacteria	IQ	Carrier of the growing fatty acid chain in fatty acid biosynthesis	-	-	-	ko:K02078	-	-	-	-	ko00000,ko00001	-	-	-	PP-binding
PALA52_02417	287.DR97_5438	0.0	912.0	COG0644@1|root,COG0644@2|Bacteria,1MZVI@1224|Proteobacteria,1RMNS@1236|Gammaproteobacteria,1YFDC@136841|Pseudomonas aeruginosa group	1236|Gammaproteobacteria	C	Tryptophan halogenase	pltA	-	1.14.19.49	ko:K14257	ko00253,ko00404,ko01057,ko01130,map00253,map00404,map01057,map01130	M00790,M00823	R05456,R11106,R11478	RC00949	ko00000,ko00001,ko00002,ko01000	-	-	-	Trp_halogenase
PALA52_02418	287.DR97_5439	0.0	4665.0	COG3321@1|root,COG3321@2|Bacteria,1R89Z@1224|Proteobacteria,1SMTI@1236|Gammaproteobacteria,1YHTC@136841|Pseudomonas aeruginosa group	1236|Gammaproteobacteria	Q	Ketoacyl-synthetase C-terminal extension	pltB	-	-	-	-	-	-	-	-	-	-	-	ADH_N,ADH_zinc_N,Acyl_transf_1,KAsynt_C_assoc,KR,Ketoacyl-synt_C,PP-binding,PS-DH,ketoacyl-synt
PALA52_02419	287.DR97_5440	0.0	3399.0	COG3321@1|root,COG3321@2|Bacteria,1R89Z@1224|Proteobacteria,1SMTI@1236|Gammaproteobacteria,1YHTC@136841|Pseudomonas aeruginosa group	1236|Gammaproteobacteria	Q	Ketoacyl-synthetase C-terminal extension	cfa7	-	-	ko:K15644,ko:K15645	-	-	-	-	ko00000,ko01008	-	-	-	ADH_N,ADH_zinc_N,Acyl_transf_1,KAsynt_C_assoc,KR,Ketoacyl-synt_C,PP-binding,PS-DH,Thioesterase,ketoacyl-synt
PALA52_02420	287.DR97_5441	0.0	1103.0	COG0644@1|root,COG0644@2|Bacteria,1MZVI@1224|Proteobacteria,1RMNS@1236|Gammaproteobacteria	1236|Gammaproteobacteria	C	oxidoreductase	-	-	1.14.19.49	ko:K14257	ko00253,ko00404,ko01057,ko01130,map00253,map00404,map01057,map01130	M00790,M00823	R05456,R11106,R11478	RC00949	ko00000,ko00001,ko00002,ko01000	-	-	-	Trp_halogenase
PALA52_02421	287.DR97_5442	6.54e-272	744.0	COG1960@1|root,COG1960@2|Bacteria,1MUDR@1224|Proteobacteria,1RMMJ@1236|Gammaproteobacteria,1YCT5@136841|Pseudomonas aeruginosa group	1236|Gammaproteobacteria	I	Acyl-CoA dehydrogenase, C-terminal domain	pltE	GO:0003674,GO:0003824,GO:0003995,GO:0008150,GO:0008152,GO:0009058,GO:0009987,GO:0016491,GO:0016627,GO:0016999,GO:0017000,GO:0017144,GO:0044237,GO:0044249,GO:0055114	1.3.8.14,1.3.8.4	ko:K00253,ko:K21782	ko00280,ko00333,ko01100,map00280,map00333,map01100	M00036,M00837,M00838	R04095,R06747	RC00246,RC03357	ko00000,ko00001,ko00002,ko01000	-	-	-	Acyl-CoA_dh_1,Acyl-CoA_dh_M,Acyl-CoA_dh_N
PALA52_02422	287.DR97_5443	0.0	983.0	COG1020@1|root,COG1020@2|Bacteria,1QK4F@1224|Proteobacteria,1RPAG@1236|Gammaproteobacteria,1YFH6@136841|Pseudomonas aeruginosa group	1236|Gammaproteobacteria	Q	AA-adenyl-dom amino acid adenylation domain protein	pltF	GO:0008150,GO:0008152,GO:0009058,GO:0009987,GO:0016999,GO:0017000,GO:0017144,GO:0044237,GO:0044249	-	ko:K12239,ko:K12240,ko:K16126,ko:K21780	ko00333,ko01053,ko01054,map00333,map01053,map01054	M00837,M00838	R06746	RC00039,RC01438	ko00000,ko00001,ko00002,ko01000,ko01008	-	-	-	AMP-binding,AMP-binding_C,Condensation,PP-binding,Thioesterase
PALA52_02423	287.DR97_5444	2.82e-191	530.0	COG3208@1|root,COG3208@2|Bacteria,1RGYT@1224|Proteobacteria,1S6ZZ@1236|Gammaproteobacteria	1236|Gammaproteobacteria	Q	Thioesterase	pltG	-	-	-	-	-	-	-	-	-	-	-	Thioesterase
PALA52_02424	287.DR97_5445	2.81e-149	420.0	COG1309@1|root,COG1309@2|Bacteria,1RHYT@1224|Proteobacteria,1S8B9@1236|Gammaproteobacteria,1YJXM@136841|Pseudomonas aeruginosa group	1236|Gammaproteobacteria	K	Domain of unknown function (DUF1956)	pltZ	-	-	-	-	-	-	-	-	-	-	-	DUF1956,TetR_N
PALA52_02425	287.DR97_5446	1.86e-223	618.0	COG0845@1|root,COG0845@2|Bacteria,1MUG6@1224|Proteobacteria,1RP16@1236|Gammaproteobacteria,1YIJ0@136841|Pseudomonas aeruginosa group	1236|Gammaproteobacteria	M	Barrel-sandwich domain of CusB or HlyD membrane-fusion	ybhG	GO:0005575,GO:0005623,GO:0005886,GO:0008150,GO:0016020,GO:0042221,GO:0044464,GO:0046677,GO:0050896,GO:0071944	-	ko:K01993	-	-	-	-	ko00000	-	-	-	Biotin_lipoyl_2,HlyD_3,HlyD_D23
PALA52_02426	287.DR97_5447	0.0	1140.0	COG1129@1|root,COG1129@2|Bacteria,1QTT9@1224|Proteobacteria,1T1GD@1236|Gammaproteobacteria	1236|Gammaproteobacteria	V	(ABC) transporter	ybhF	-	-	ko:K01990	-	M00254	-	-	ko00000,ko00002,ko02000	3.A.1	-	-	ABC_tran
PALA52_02427	287.DR97_5448	8.97e-254	698.0	COG0842@1|root,COG0842@2|Bacteria,1MW5R@1224|Proteobacteria,1RPB4@1236|Gammaproteobacteria,1YGFR@136841|Pseudomonas aeruginosa group	1236|Gammaproteobacteria	V	ABC-2 family transporter protein	-	-	-	ko:K01992	-	M00254	-	-	ko00000,ko00002,ko02000	3.A.1	-	-	ABC2_membrane_3
PALA52_02428	287.DR97_5449	2.47e-253	696.0	COG0842@1|root,COG0842@2|Bacteria,1MW5R@1224|Proteobacteria,1SYDD@1236|Gammaproteobacteria,1YJ5Q@136841|Pseudomonas aeruginosa group	1236|Gammaproteobacteria	V	ABC-2 family transporter protein	ybhR	-	-	ko:K01992	-	M00254	-	-	ko00000,ko00002,ko02000	3.A.1	-	-	ABC2_membrane_3
PALA52_02429	287.DR97_5450	0.0	937.0	COG1538@1|root,COG1538@2|Bacteria,1MUA8@1224|Proteobacteria,1RN5K@1236|Gammaproteobacteria,1YIRN@136841|Pseudomonas aeruginosa group	1236|Gammaproteobacteria	MU	Outer membrane efflux protein	-	-	-	ko:K18139	ko01501,ko02024,map01501,map02024	M00642,M00643,M00647,M00718,M00768,M00822	-	-	ko00000,ko00001,ko00002,ko01504,ko02000	1.B.17,2.A.6.2	-	-	OEP
PALA52_02430	287.DR97_5451	9.49e-136	385.0	COG1280@1|root,COG1280@2|Bacteria,1N53S@1224|Proteobacteria,1T0UJ@1236|Gammaproteobacteria	1236|Gammaproteobacteria	E	LysE type translocator	pltP	-	-	-	-	-	-	-	-	-	-	-	LysE
PALA52_02447	1524467.IV04_03260	1.67e-134	393.0	COG0789@1|root,COG0789@2|Bacteria,1MWN0@1224|Proteobacteria,1RQA6@1236|Gammaproteobacteria,4028F@613|Serratia	1236|Gammaproteobacteria	K	MerR family transcriptional regulator	mta_1	-	-	-	-	-	-	-	-	-	-	-	MerR_1,TipAS
PALA52_02448	287.DR97_5589	4.07e-139	393.0	COG2249@1|root,COG2249@2|Bacteria,1MWV9@1224|Proteobacteria,1RQ16@1236|Gammaproteobacteria,1YF67@136841|Pseudomonas aeruginosa group	1236|Gammaproteobacteria	S	Flavodoxin-like fold	mdaB	GO:0000166,GO:0003674,GO:0003824,GO:0005488,GO:0005575,GO:0005622,GO:0005623,GO:0005737,GO:0005829,GO:0008150,GO:0008152,GO:0008753,GO:0016491,GO:0016651,GO:0016655,GO:0036094,GO:0043167,GO:0043168,GO:0044424,GO:0044444,GO:0044464,GO:0048037,GO:0050660,GO:0050662,GO:0055114,GO:0097159,GO:1901265,GO:1901363	-	ko:K03923	-	-	-	-	ko00000	-	-	iLF82_1304.LF82_1283	Flavodoxin_2
PALA52_02450	287.DR97_5591	2.09e-118	340.0	COG1670@1|root,COG1670@2|Bacteria,1RIJY@1224|Proteobacteria,1S9HK@1236|Gammaproteobacteria	1236|Gammaproteobacteria	J	Acetyltransferase (GNAT) domain	-	-	-	-	-	-	-	-	-	-	-	-	Acetyltransf_1
PALA52_02453	1388763.O165_003985	1.14e-31	113.0	COG2963@1|root,COG2963@2|Bacteria,1RI5G@1224|Proteobacteria,1S8QB@1236|Gammaproteobacteria,1YZHK@136845|Pseudomonas putida group	1236|Gammaproteobacteria	L	Evidence 2b Function of strongly homologous gene	-	-	-	-	-	-	-	-	-	-	-	-	HTH_28
PALA52_02454	287.DR97_3215	7.71e-184	511.0	COG2801@1|root,COG2801@2|Bacteria,1PUMN@1224|Proteobacteria,1RYSS@1236|Gammaproteobacteria	1236|Gammaproteobacteria	L	PFAM Integrase catalytic region	-	-	-	ko:K07497	-	-	-	-	ko00000	-	-	-	HTH_21,rve,rve_3
PALA52_02459	287.DR97_5598	3.65e-294	807.0	COG4191@1|root,COG4191@2|Bacteria,1RCM9@1224|Proteobacteria,1RSDZ@1236|Gammaproteobacteria,1YIPV@136841|Pseudomonas aeruginosa group	1236|Gammaproteobacteria	T	His Kinase A (phospho-acceptor) domain	-	-	2.7.13.3	ko:K02482	-	-	-	-	ko00000,ko01000,ko01001,ko02022	-	-	-	HATPase_c,HisKA,Response_reg
PALA52_02463	287.DR97_5602	1.84e-76	229.0	2AIUG@1|root,319BN@2|Bacteria,1QFAW@1224|Proteobacteria,1TCH0@1236|Gammaproteobacteria,1YKBM@136841|Pseudomonas aeruginosa group	1236|Gammaproteobacteria	-	-	-	-	-	-	-	-	-	-	-	-	-	-	-
PALA52_02466	1216976.AX27061_3953	2.07e-250	691.0	COG0446@1|root,COG0446@2|Bacteria,1N5MC@1224|Proteobacteria,2VKI2@28216|Betaproteobacteria,3T4WV@506|Alcaligenaceae	28216|Betaproteobacteria	S	Pyridine nucleotide-disulphide oxidoreductase	-	-	1.8.5.4	ko:K17218	ko00920,map00920	-	R10152	RC03155	ko00000,ko00001,ko01000	-	-	-	Pyr_redox_2
PALA52_02467	1156919.QWC_17272	2.8e-33	120.0	COG2427@1|root,COG2427@2|Bacteria,1NBU2@1224|Proteobacteria,2VVC8@28216|Betaproteobacteria,3T8B8@506|Alcaligenaceae	28216|Betaproteobacteria	S	Protein of unknown function (DUF1641)	-	-	-	-	-	-	-	-	-	-	-	-	DUF1641
PALA52_02468	1124983.PFLCHA0_c13620	2.94e-134	387.0	COG4106@1|root,COG4106@2|Bacteria,1Q2Y3@1224|Proteobacteria,1RPKV@1236|Gammaproteobacteria,1YQST@136843|Pseudomonas fluorescens group	1236|Gammaproteobacteria	S	trans-aconitate 2-methyltransferase	tam	-	2.1.1.144	ko:K00598	-	-	-	-	ko00000,ko01000	-	-	-	Methyltransf_25
PALA52_02470	287.DR97_5606	7.88e-67	208.0	COG5455@1|root,COG5455@2|Bacteria,1RF2G@1224|Proteobacteria,1T0WE@1236|Gammaproteobacteria,1YGKU@136841|Pseudomonas aeruginosa group	1236|Gammaproteobacteria	S	Nickel/cobalt transporter regulator	cigR	-	-	-	-	-	-	-	-	-	-	-	RcnB
PALA52_02533	287.DR97_5669	1.71e-301	822.0	28PQM@1|root,2ZCCK@2|Bacteria,1RC8Y@1224|Proteobacteria,1SN7B@1236|Gammaproteobacteria,1YJH7@136841|Pseudomonas aeruginosa group	1236|Gammaproteobacteria	-	-	-	-	-	-	-	-	-	-	-	-	-	-	-
PALA52_02571	287.DR97_5711	0.0	1102.0	COG2831@1|root,COG2831@2|Bacteria,1MXF6@1224|Proteobacteria,1RP05@1236|Gammaproteobacteria,1YFQC@136841|Pseudomonas aeruginosa group	1236|Gammaproteobacteria	U	POTRA domain	shlB	-	-	ko:K07326	ko05133,map05133	-	-	-	ko00000,ko00001	-	-	-	POTRA_2,POTRA_3,ShlB
PALA52_02572	287.DR97_2995	0.0	3263.0	COG3210@1|root,COG3210@2|Bacteria,1MX2K@1224|Proteobacteria,1RNRK@1236|Gammaproteobacteria,1YD8T@136841|Pseudomonas aeruginosa group	1236|Gammaproteobacteria	U	haemagglutination activity domain	-	-	-	ko:K15125	ko05133,map05133	-	-	-	ko00000,ko00001,ko00536	-	-	-	DUF637,Fil_haemagg,Fil_haemagg_2,Haemagg_act
PALA52_02573	1265490.JHVY01000021_gene3674	1.26e-245	721.0	COG3210@1|root,COG3210@2|Bacteria,1MX2K@1224|Proteobacteria,1RNRK@1236|Gammaproteobacteria	1236|Gammaproteobacteria	U	Large exoproteins involved in heme utilization or adhesion	-	-	-	ko:K15125	ko05133,map05133	-	-	-	ko00000,ko00001,ko00536	-	-	-	DUF637,Fil_haemagg,Fil_haemagg_2,Haemagg_act
PALA52_02574	1294143.H681_25085	2.27e-181	587.0	COG3210@1|root,COG3210@2|Bacteria,1MX2K@1224|Proteobacteria,1RNRK@1236|Gammaproteobacteria	1236|Gammaproteobacteria	U	Large exoproteins involved in heme utilization or adhesion	-	-	-	ko:K15125	ko05133,map05133	-	-	-	ko00000,ko00001,ko00536	-	-	-	DUF637,Fil_haemagg,Fil_haemagg_2,Haemagg_act
PALA52_02575	1282356.H045_08325	1.19e-102	324.0	COG3210@1|root,COG3210@2|Bacteria,1MX2K@1224|Proteobacteria,1RNRK@1236|Gammaproteobacteria,1YP22@136843|Pseudomonas fluorescens group	1236|Gammaproteobacteria	U	COG3210 Large exoproteins involved in heme utilization or adhesion	-	-	-	ko:K15125	ko05133,map05133	-	-	-	ko00000,ko00001,ko00536	-	-	-	Cytotoxic,DUF637,ESPR,Fil_haemagg,Fil_haemagg_2,Haemagg_act,PT-VENN,Tox-REase-7
PALA52_02576	1114970.PSF113_1491	8.98e-127	365.0	COG1943@1|root,COG1943@2|Bacteria,1R75U@1224|Proteobacteria,1S1SP@1236|Gammaproteobacteria	1236|Gammaproteobacteria	L	Transposase IS200 like	-	-	-	ko:K07491	-	-	-	-	ko00000	-	-	-	Y1_Tnp
PALA52_02577	287.DR97_4557	0.0	1331.0	COG3209@1|root,COG3209@2|Bacteria,1MVV1@1224|Proteobacteria,1RP75@1236|Gammaproteobacteria,1YFEJ@136841|Pseudomonas aeruginosa group	1236|Gammaproteobacteria	M	RHS Repeat	-	-	-	-	-	-	-	-	-	-	-	-	DUF11,RHS,RHS_repeat
PALA52_02578	1453503.AU05_20240	1.47e-79	246.0	COG3209@1|root,COG3209@2|Bacteria,1N632@1224|Proteobacteria,1SS79@1236|Gammaproteobacteria,1YGN8@136841|Pseudomonas aeruginosa group	1236|Gammaproteobacteria	M	COG3209 Rhs family protein	-	-	-	-	-	-	-	-	-	-	-	-	RHS_repeat
PALA52_02594	287.DR97_5992	1.21e-214	594.0	COG0726@1|root,COG0726@2|Bacteria	2|Bacteria	G	polysaccharide deacetylase	-	-	-	-	-	-	-	-	-	-	-	-	Polysacc_deac_1
PALA52_02608	287.DR97_6006	8.33e-257	702.0	COG1670@1|root,COG1670@2|Bacteria,1MWIE@1224|Proteobacteria,1S2ID@1236|Gammaproteobacteria,1YDKI@136841|Pseudomonas aeruginosa group	1236|Gammaproteobacteria	J	Siderophore biosynthesis protein domain	pvdYII	-	2.3.1.102	ko:K03896	ko00310,ko01120,map00310,map01120	-	R03168	RC00004,RC00865	ko00000,ko00001,ko01000	-	-	-	Acetyltransf_8
PALA52_02612	1278073.MYSTI_00125	4.78e-48	173.0	COG0664@1|root,COG0664@2|Bacteria,1QX5I@1224|Proteobacteria,43BY8@68525|delta/epsilon subdivisions,2X794@28221|Deltaproteobacteria,2YW6W@29|Myxococcales	28221|Deltaproteobacteria	T	Cyclic nucleotide-monophosphate binding domain	-	-	-	-	-	-	-	-	-	-	-	-	cNMP_binding
PALA52_02613	483219.LILAB_18900	4.36e-120	348.0	COG0500@1|root,COG2226@2|Bacteria,1MV7N@1224|Proteobacteria,42T49@68525|delta/epsilon subdivisions,2WPYV@28221|Deltaproteobacteria	28221|Deltaproteobacteria	Q	Methyltransferase domain	-	-	-	-	-	-	-	-	-	-	-	-	Methyltransf_11
PALA52_02633	287.DR97_6030	6.55e-292	796.0	COG3182@1|root,COG3182@2|Bacteria,1MW2S@1224|Proteobacteria,1RZFD@1236|Gammaproteobacteria,1YEZB@136841|Pseudomonas aeruginosa group	1236|Gammaproteobacteria	S	PepSY-associated TM region	-	-	-	-	-	-	-	-	-	-	-	-	PepSY,PepSY_TM
PALA52_02634	287.DR97_6031	0.0	8086.0	COG1020@1|root,COG1020@2|Bacteria,1QK4F@1224|Proteobacteria,1RPAG@1236|Gammaproteobacteria,1YFH6@136841|Pseudomonas aeruginosa group	1236|Gammaproteobacteria	Q	AA-adenyl-dom amino acid adenylation domain protein	pvdI	-	-	ko:K12239,ko:K12240	ko01053,map01053	-	-	-	ko00000,ko00001,ko01008	-	-	-	AMP-binding,AMP-binding_C,Condensation,PP-binding,Thioesterase
PALA52_02635	1211112.ALJC01000112_gene3571	7.67e-33	130.0	COG1020@1|root,COG1020@2|Bacteria,1QK4F@1224|Proteobacteria,1RPAG@1236|Gammaproteobacteria	1236|Gammaproteobacteria	Q	COG1020 Non-ribosomal peptide synthetase modules and related proteins	pvdI	-	-	-	-	-	-	-	-	-	-	-	AMP-binding,AMP-binding_C,Condensation,PP-binding,Thioesterase
PALA52_02636	287.DR97_6032	0.0	9357.0	COG1020@1|root,COG1020@2|Bacteria,1QK4F@1224|Proteobacteria,1RPAG@1236|Gammaproteobacteria,1YFH6@136841|Pseudomonas aeruginosa group	1236|Gammaproteobacteria	Q	AA-adenyl-dom amino acid adenylation domain protein	pvdJ	-	-	ko:K12239,ko:K12240	ko01053,map01053	-	-	-	ko00000,ko00001,ko01008	-	-	-	AMP-binding,AMP-binding_C,Condensation,PP-binding,TauD,Thioesterase
PALA52_02637	287.DR97_6033	6.34e-228	628.0	COG0657@1|root,COG0657@2|Bacteria,1NEXK@1224|Proteobacteria,1RNNH@1236|Gammaproteobacteria,1YFVX@136841|Pseudomonas aeruginosa group	1236|Gammaproteobacteria	I	alpha/beta hydrolase fold	-	-	-	ko:K01066	-	-	-	-	ko00000,ko01000	-	-	-	Abhydrolase_3
PALA52_02638	287.DR97_6034	0.0	1568.0	COG4774@1|root,COG4774@2|Bacteria,1MV0X@1224|Proteobacteria,1T1GW@1236|Gammaproteobacteria,1YE6N@136841|Pseudomonas aeruginosa group	1236|Gammaproteobacteria	P	Secretin and TonB N terminus short domain	-	-	-	ko:K02014	-	-	-	-	ko00000,ko02000	1.B.14	-	-	Plug,STN,TonB_dep_Rec
PALA52_02639	287.DR97_6035	0.0	1048.0	COG4615@1|root,COG4615@2|Bacteria,1MVIC@1224|Proteobacteria,1RMYK@1236|Gammaproteobacteria,1YEM6@136841|Pseudomonas aeruginosa group	1236|Gammaproteobacteria	V	ATPases associated with a variety of cellular activities	pvdE	-	-	ko:K06160	ko02010,map02010	-	-	-	ko00000,ko00001,ko02000	3.A.1.113.2	-	-	ABC_membrane,ABC_tran
PALA52_02640	287.DR97_6036	1.1e-200	556.0	COG0299@1|root,COG0299@2|Bacteria,1QDP4@1224|Proteobacteria,1ST58@1236|Gammaproteobacteria	1236|Gammaproteobacteria	F	N(5)-hydroxyornithine transformylase PvdF	-	-	-	-	-	-	-	-	-	-	-	-	Formyl_trans_N
PALA52_02642	287.DR97_6038	7.11e-315	857.0	COG0520@1|root,COG0520@2|Bacteria,1R4SM@1224|Proteobacteria,1RQR6@1236|Gammaproteobacteria,1YIFB@136841|Pseudomonas aeruginosa group	1236|Gammaproteobacteria	E	Aminotransferase class-V	pvdN	-	5.1.1.17	ko:K04127	ko00311,ko01100,ko01130,map00311,map01100,map01130	M00673	R04147	RC00302	ko00000,ko00001,ko00002,ko01000	-	-	-	Aminotran_5
PALA52_02643	287.DR97_6039	0.0	900.0	COG2355@1|root,COG2355@2|Bacteria,1MWEW@1224|Proteobacteria,1S4IM@1236|Gammaproteobacteria,1YGEU@136841|Pseudomonas aeruginosa group	1236|Gammaproteobacteria	E	Membrane dipeptidase (Peptidase family M19)	pvdM	-	3.4.13.19	ko:K01273	-	-	-	-	ko00000,ko00537,ko01000,ko01002,ko04147	-	-	-	Peptidase_M19
PALA52_02648	287.DR97_6044	6.94e-237	651.0	COG3712@1|root,COG3712@2|Bacteria,1RF1W@1224|Proteobacteria,1SYDM@1236|Gammaproteobacteria,1YKVD@136841|Pseudomonas aeruginosa group	1236|Gammaproteobacteria	PT	Domain of unknown function (DUF4880)	fpvR	-	-	ko:K07165	-	-	-	-	ko00000	-	-	-	DUF4880,DUF4974,FecR
PALA52_02649	287.DR97_6045	8.3e-105	303.0	COG1595@1|root,COG1595@2|Bacteria,1RM2Q@1224|Proteobacteria,1S80F@1236|Gammaproteobacteria,1YKN0@136841|Pseudomonas aeruginosa group	1236|Gammaproteobacteria	K	ECF sigma factor	fpvI	-	-	ko:K03088	-	-	-	-	ko00000,ko03021	-	-	-	Sigma70_r2,Sigma70_r4_2
PALA52_02650	287.DR97_6046	0.0	881.0	COG3486@1|root,COG3486@2|Bacteria,1MX36@1224|Proteobacteria,1RZXS@1236|Gammaproteobacteria,1YEE3@136841|Pseudomonas aeruginosa group	1236|Gammaproteobacteria	Q	L-lysine 6-monooxygenase (NADPH-requiring)	pvdA	-	1.14.13.195,1.14.13.196	ko:K10531	-	-	-	-	ko00000,ko01000	-	-	-	K_oxygenase
PALA52_02651	287.DR97_6047	0.0	1509.0	COG2366@1|root,COG2366@2|Bacteria,1MVMH@1224|Proteobacteria,1RMPX@1236|Gammaproteobacteria,1YIUH@136841|Pseudomonas aeruginosa group	1236|Gammaproteobacteria	S	Penicillin amidase	pvdQ	-	3.5.1.97	ko:K07116	-	-	-	-	ko00000,ko01000	-	-	-	Penicil_amidase
PALA52_02652	287.DR97_6048	3.19e-66	201.0	COG0735@1|root,COG0735@2|Bacteria,1QEM6@1224|Proteobacteria,1TBD5@1236|Gammaproteobacteria,1YH8G@136841|Pseudomonas aeruginosa group	1236|Gammaproteobacteria	P	belongs to the Fur family	-	-	-	-	-	-	-	-	-	-	-	-	FUR,HTH_12
PALA52_02654	287.DR97_6050	1.39e-276	756.0	COG1304@1|root,COG1304@2|Bacteria,1MUEZ@1224|Proteobacteria,1RPA1@1236|Gammaproteobacteria,1YFCI@136841|Pseudomonas aeruginosa group	1236|Gammaproteobacteria	C	Catalyzes the conversion of L-lactate to pyruvate. Is coupled to the respiratory chain	lldD	-	1.1.2.3	ko:K00101	ko00620,ko01100,map00620,map01100	-	R00196	RC00044	ko00000,ko00001,ko01000	-	-	-	FMN_dh
PALA52_02655	390235.PputW619_1954	1.98e-11	61.2	2A4GD@1|root,30T2I@2|Bacteria,1Q902@1224|Proteobacteria,1TKFS@1236|Gammaproteobacteria,1YVNI@136845|Pseudomonas putida group	1236|Gammaproteobacteria	S	Protein of unknown function (DUF1654)	-	-	-	-	-	-	-	-	-	-	-	-	DUF1654
PALA52_02657	287.DR97_6053	3.84e-113	324.0	COG2080@1|root,COG2080@2|Bacteria,1RD8C@1224|Proteobacteria,1S3RP@1236|Gammaproteobacteria,1YG53@136841|Pseudomonas aeruginosa group	1236|Gammaproteobacteria	C	[2Fe-2S] binding domain	iorA	-	1.17.2.1,1.3.99.16	ko:K07302,ko:K18029	ko00760,ko01120,map00760,map01120	M00622	R09473	RC00589	ko00000,ko00001,ko00002,ko01000	-	-	-	Fer2,Fer2_2
PALA52_02658	287.DR97_6054	0.0	1544.0	COG1529@1|root,COG1529@2|Bacteria,1QTTJ@1224|Proteobacteria,1RNCM@1236|Gammaproteobacteria,1YDAJ@136841|Pseudomonas aeruginosa group	1236|Gammaproteobacteria	C	Aldehyde oxidase and xanthine dehydrogenase, a/b hammerhead domain	iorB	-	1.3.99.16	ko:K07303	-	-	-	-	ko00000,ko01000	-	-	-	Ald_Xan_dh_C,Ald_Xan_dh_C2,TAT_signal
PALA52_02662	287.DR97_6057	1.49e-89	262.0	2ANY6@1|root,31DZ3@2|Bacteria,1RIZN@1224|Proteobacteria,1S77G@1236|Gammaproteobacteria,1YH6S@136841|Pseudomonas aeruginosa group	1236|Gammaproteobacteria	S	Domain of unknown function (DUF4280)	-	-	-	-	-	-	-	-	-	-	-	-	DUF4280
PALA52_02664	287.DR97_6059	0.0	1097.0	COG3501@1|root,COG3501@2|Bacteria,1MU7Q@1224|Proteobacteria,1RMZS@1236|Gammaproteobacteria,1YFD4@136841|Pseudomonas aeruginosa group	1236|Gammaproteobacteria	S	Gp5 C-terminal repeat (3 copies)	vgrG	-	-	ko:K11904	ko03070,map03070	M00334	-	-	ko00000,ko00001,ko00002,ko02044	3.A.23.1	-	-	Gp5_C,Phage_GPD
PALA52_02714	287.DR97_6117	3.94e-271	743.0	COG1680@1|root,COG1680@2|Bacteria,1MVPR@1224|Proteobacteria,1RRTD@1236|Gammaproteobacteria	1236|Gammaproteobacteria	V	COG1680 Beta-lactamase class C and other penicillin binding proteins	yfeW	-	-	-	-	-	-	-	-	-	-	-	Beta-lactamase
PALA52_02717	287.DR97_6127	0.0	2371.0	COG1020@1|root,COG1020@2|Bacteria,1QK4F@1224|Proteobacteria,1RPAG@1236|Gammaproteobacteria,1YFH6@136841|Pseudomonas aeruginosa group	1236|Gammaproteobacteria	Q	AA-adenyl-dom amino acid adenylation domain protein	-	-	-	ko:K12239,ko:K12240	ko01053,map01053	-	-	-	ko00000,ko00001,ko01008	-	-	-	AMP-binding,AMP-binding_C,Condensation,PP-binding,Thioesterase
PALA52_02720	287.DR97_6131	0.0	2630.0	COG1020@1|root,COG3208@1|root,COG1020@2|Bacteria,COG3208@2|Bacteria,1QK4F@1224|Proteobacteria,1RPAG@1236|Gammaproteobacteria,1YFH6@136841|Pseudomonas aeruginosa group	1236|Gammaproteobacteria	Q	AA-adenyl-dom amino acid adenylation domain protein	-	-	-	ko:K04788,ko:K12239,ko:K12240,ko:K15674	ko01053,map01053	-	-	-	ko00000,ko00001,ko01008	-	-	-	AMP-binding,AMP-binding_C,Condensation,KAsynt_C_assoc,Ketoacyl-synt_C,PP-binding,Thioesterase,ketoacyl-synt
PALA52_02721	287.DR97_6132	7.99e-120	343.0	COG2606@1|root,COG2606@2|Bacteria,1RGD2@1224|Proteobacteria	1224|Proteobacteria	S	ybak prolyl-trna synthetase associated region	-	-	-	-	-	-	-	-	-	-	-	-	tRNA_edit
PALA52_02786	287.DR97_6316	0.0	1236.0	COG0489@1|root,COG3206@1|root,COG0489@2|Bacteria,COG3206@2|Bacteria,1R6RF@1224|Proteobacteria,1S79X@1236|Gammaproteobacteria,1YFQA@136841|Pseudomonas aeruginosa group	1236|Gammaproteobacteria	DM	Chain length determinant protein	pslE	-	-	ko:K20998	ko02025,map02025	-	-	-	ko00000,ko00001	-	-	-	-
PALA52_02789	287.DR97_6319	0.0	956.0	COG0662@1|root,COG0836@1|root,COG0662@2|Bacteria,COG0836@2|Bacteria,1MV39@1224|Proteobacteria,1RNQI@1236|Gammaproteobacteria,1YF2N@136841|Pseudomonas aeruginosa group	1236|Gammaproteobacteria	GM	Belongs to the mannose-6-phosphate isomerase type 2 family	manC	-	2.7.7.13,5.3.1.8	ko:K00971,ko:K16011	ko00051,ko00520,ko01100,ko01110,ko01130,ko02025,map00051,map00520,map01100,map01110,map01130,map02025	M00114,M00361,M00362	R00885,R01819	RC00002,RC00376	ko00000,ko00001,ko00002,ko01000	-	-	-	MannoseP_isomer,NTP_transferase
PALA52_02793	1301098.PKB_2402	5.35e-107	316.0	COG1028@1|root,COG1028@2|Bacteria,1MXNY@1224|Proteobacteria,1RY5U@1236|Gammaproteobacteria	1236|Gammaproteobacteria	IQ	Dehydrogenases with different specificities (Related to short-chain alcohol dehydrogenases)	-	-	-	-	-	-	-	-	-	-	-	-	adh_short_C2
PALA52_02794	301.JNHE01000003_gene1936	2.03e-12	66.2	2AH87@1|root,317I7@2|Bacteria,1QEIX@1224|Proteobacteria,1TBA1@1236|Gammaproteobacteria,1YH53@136841|Pseudomonas aeruginosa group	1236|Gammaproteobacteria	-	-	-	-	-	-	-	-	-	-	-	-	-	-	-
PALA52_02797	287.DR97_6363	1.92e-22	92.0	COG3620@1|root,COG3620@2|Bacteria	2|Bacteria	K	sequence-specific DNA binding	-	-	-	-	-	-	-	-	-	-	-	-	DUF4870,HTH_3,HTH_31
PALA52_02798	644801.Psest_2191	3.33e-189	538.0	2CDPS@1|root,2ZBQT@2|Bacteria,1RB59@1224|Proteobacteria,1S2U0@1236|Gammaproteobacteria	1236|Gammaproteobacteria	S	Phage replication protein CRI	g2p	-	-	-	-	-	-	-	-	-	-	-	Phage_CRI,Phage_X
PALA52_02804	1215092.PA6_046_00350	7.38e-25	97.8	2EU86@1|root,33MQM@2|Bacteria,1NI71@1224|Proteobacteria,1STAJ@1236|Gammaproteobacteria	1236|Gammaproteobacteria	S	Protein of unknown function (DUF2523)	-	-	-	-	-	-	-	-	-	-	-	-	DUF2523
PALA52_02805	1215092.PA6_046_00360	4.11e-167	481.0	COG4128@1|root,COG4128@2|Bacteria,1RCY8@1224|Proteobacteria,1S4JQ@1236|Gammaproteobacteria	1236|Gammaproteobacteria	S	Zonular occludens toxin (Zot)	-	-	-	ko:K10954	ko05110,map05110	-	-	-	ko00000,ko00001,ko02042	-	-	-	Zot
PALA52_02808	287.DR97_6363	1.92e-22	92.0	COG3620@1|root,COG3620@2|Bacteria	2|Bacteria	K	sequence-specific DNA binding	-	-	-	-	-	-	-	-	-	-	-	-	DUF4870,HTH_3,HTH_31
PALA52_02809	644801.Psest_2191	3.33e-189	538.0	2CDPS@1|root,2ZBQT@2|Bacteria,1RB59@1224|Proteobacteria,1S2U0@1236|Gammaproteobacteria	1236|Gammaproteobacteria	S	Phage replication protein CRI	g2p	-	-	-	-	-	-	-	-	-	-	-	Phage_CRI,Phage_X
PALA52_02815	1215092.PA6_046_00350	7.38e-25	97.8	2EU86@1|root,33MQM@2|Bacteria,1NI71@1224|Proteobacteria,1STAJ@1236|Gammaproteobacteria	1236|Gammaproteobacteria	S	Protein of unknown function (DUF2523)	-	-	-	-	-	-	-	-	-	-	-	-	DUF2523
PALA52_02816	1215092.PA6_046_00360	1.46e-167	481.0	COG4128@1|root,COG4128@2|Bacteria,1RCY8@1224|Proteobacteria,1S4JQ@1236|Gammaproteobacteria	1236|Gammaproteobacteria	S	Zonular occludens toxin (Zot)	-	-	-	ko:K10954	ko05110,map05110	-	-	-	ko00000,ko00001,ko02042	-	-	-	Zot
PALA52_02817	287.DR97_6184	8.36e-277	758.0	COG2508@1|root,COG2508@2|Bacteria,1RFZH@1224|Proteobacteria,1TBIB@1236|Gammaproteobacteria,1YHQ6@136841|Pseudomonas aeruginosa group	1236|Gammaproteobacteria	QT	PucR C-terminal helix-turn-helix domain	-	-	-	-	-	-	-	-	-	-	-	-	HTH_30
PALA52_02818	160488.PP_2813	8.62e-182	511.0	COG4447@1|root,COG4447@2|Bacteria,1Q7AA@1224|Proteobacteria,1TBR1@1236|Gammaproteobacteria,1YWZ9@136845|Pseudomonas putida group	1236|Gammaproteobacteria	S	Photosynthesis system II assembly factor YCF48	-	-	-	-	-	-	-	-	-	-	-	-	PSII_BNR
PALA52_02819	160488.PP_2812	0.0	1408.0	COG1033@1|root,COG1033@2|Bacteria,1MUE1@1224|Proteobacteria,1RN01@1236|Gammaproteobacteria,1YYC0@136845|Pseudomonas putida group	1236|Gammaproteobacteria	S	AcrB/AcrD/AcrF family	-	-	-	ko:K07003	-	-	-	-	ko00000	-	-	-	MMPL
PALA52_02820	160488.PP_2811	0.0	1104.0	COG3203@1|root,COG3203@2|Bacteria,1MXEB@1224|Proteobacteria,1RZAB@1236|Gammaproteobacteria,1YW14@136845|Pseudomonas putida group	1236|Gammaproteobacteria	M	Protein of unknown function (DUF1302)	-	-	-	-	-	-	-	-	-	-	-	-	DUF1302
PALA52_02821	287.DR97_6189	0.0	963.0	28H52@1|root,2Z7HQ@2|Bacteria,1MXTF@1224|Proteobacteria,1RRW8@1236|Gammaproteobacteria,1YIP1@136841|Pseudomonas aeruginosa group	1236|Gammaproteobacteria	S	Protein of unknown function (DUF1329)	-	-	-	-	-	-	-	-	-	-	-	-	DUF1329
PALA52_02822	160488.PP_2809	2.53e-113	330.0	2922Y@1|root,2ZPN2@2|Bacteria,1NSXM@1224|Proteobacteria,1SM55@1236|Gammaproteobacteria,1YWRK@136845|Pseudomonas putida group	1236|Gammaproteobacteria	-	-	-	-	-	-	-	-	-	-	-	-	-	-	-
PALA52_02823	287.DR97_6191	0.0	902.0	COG0665@1|root,COG0665@2|Bacteria,1PDQA@1224|Proteobacteria,1SJZ9@1236|Gammaproteobacteria,1YIUQ@136841|Pseudomonas aeruginosa group	1236|Gammaproteobacteria	E	FAD binding domain	-	-	-	-	-	-	-	-	-	-	-	-	DAO
PALA52_02824	287.DR97_6192	6.52e-209	577.0	COG5285@1|root,COG5285@2|Bacteria,1QT1Y@1224|Proteobacteria,1SM90@1236|Gammaproteobacteria,1YHXZ@136841|Pseudomonas aeruginosa group	1236|Gammaproteobacteria	Q	Phytanoyl-CoA dioxygenase (PhyH)	-	-	-	-	-	-	-	-	-	-	-	-	PhyH
PALA52_02825	287.DR97_6193	1.03e-126	361.0	COG1309@1|root,COG1309@2|Bacteria,1NDDX@1224|Proteobacteria,1SIIT@1236|Gammaproteobacteria,1YHN8@136841|Pseudomonas aeruginosa group	1236|Gammaproteobacteria	K	Bacterial regulatory proteins, tetR family	-	-	-	-	-	-	-	-	-	-	-	-	TetR_N
PALA52_02826	287.DR97_6194	0.0	963.0	COG2072@1|root,COG2072@2|Bacteria,1MU71@1224|Proteobacteria,1RP8X@1236|Gammaproteobacteria,1YI33@136841|Pseudomonas aeruginosa group	1236|Gammaproteobacteria	P	Flavin-binding monooxygenase-like	ethA	GO:0003674,GO:0003824,GO:0004497,GO:0008150,GO:0008152,GO:0016491,GO:0016705,GO:0016709,GO:0055114	-	-	-	-	-	-	-	-	-	-	FMO-like,NAD_binding_8,Pyr_redox_3
PALA52_02827	287.DR97_6195	4.53e-206	570.0	COG2267@1|root,COG2267@2|Bacteria,1R41P@1224|Proteobacteria,1T1IM@1236|Gammaproteobacteria	1236|Gammaproteobacteria	I	hydrolases or acyltransferases (alpha beta hydrolase superfamily)	-	-	-	-	-	-	-	-	-	-	-	-	Abhydrolase_1
PALA52_02828	287.DR97_6196	5.8e-270	739.0	COG1454@1|root,COG1454@2|Bacteria,1MVPH@1224|Proteobacteria,1RMVU@1236|Gammaproteobacteria,1YJ1H@136841|Pseudomonas aeruginosa group	1236|Gammaproteobacteria	C	Iron-containing alcohol dehydrogenase	-	-	1.1.1.1	ko:K00001,ko:K13954	ko00010,ko00071,ko00350,ko00625,ko00626,ko00830,ko00980,ko00982,ko01100,ko01110,ko01120,ko01130,ko01220,map00010,map00071,map00350,map00625,map00626,map00830,map00980,map00982,map01100,map01110,map01120,map01130,map01220	-	R00623,R00754,R02124,R04805,R04880,R05233,R05234,R06917,R06927,R07105,R08281,R08306,R08310	RC00050,RC00087,RC00088,RC00099,RC00116,RC00649,RC01734,RC02273	ko00000,ko00001,ko01000	-	-	-	Fe-ADH
PALA52_02829	160488.PP_2802	1.33e-293	804.0	COG0531@1|root,COG0531@2|Bacteria,1MXNJ@1224|Proteobacteria,1RMKV@1236|Gammaproteobacteria,1YW19@136845|Pseudomonas putida group	1236|Gammaproteobacteria	E	amino acid	-	-	-	ko:K14052	-	-	-	-	ko00000,ko02000	2.A.3.1.13	-	-	AA_permease,AA_permease_2
PALA52_02830	287.DR97_6198	0.0	921.0	COG1012@1|root,COG1012@2|Bacteria,1MU1V@1224|Proteobacteria,1RMBQ@1236|Gammaproteobacteria,1YE6P@136841|Pseudomonas aeruginosa group	1236|Gammaproteobacteria	C	Aldehyde dehydrogenase family	prr	GO:0003674,GO:0003824,GO:0004029,GO:0005488,GO:0005515,GO:0005575,GO:0005622,GO:0005623,GO:0005737,GO:0005829,GO:0006576,GO:0006595,GO:0006598,GO:0006807,GO:0008150,GO:0008152,GO:0009056,GO:0009308,GO:0009310,GO:0009445,GO:0009447,GO:0009987,GO:0016491,GO:0016620,GO:0016903,GO:0019145,GO:0033737,GO:0034641,GO:0042402,GO:0042802,GO:0044106,GO:0044237,GO:0044424,GO:0044444,GO:0044464,GO:0055114,GO:…	1.2.1.19	ko:K00137	ko00330,ko00410,ko01100,map00330,map00410,map01100	-	R02549	RC00080	ko00000,ko00001,ko01000	-	-	iAF1260.b1444,iBWG_1329.BWG_1269,iECDH10B_1368.ECDH10B_1574,iECDH1ME8569_1439.ECDH1ME8569_1387,iEcDH1_1363.EcDH1_2202,iJO1366.b1444,iY75_1357.Y75_RS07595	Aldedh
PALA52_02831	287.DR97_6199	9.45e-299	815.0	COG0160@1|root,COG0160@2|Bacteria,1MWY6@1224|Proteobacteria,1RQKU@1236|Gammaproteobacteria,1YDG4@136841|Pseudomonas aeruginosa group	1236|Gammaproteobacteria	E	Belongs to the class-III pyridoxal-phosphate-dependent aminotransferase family	ectB	GO:0003674,GO:0003824,GO:0006082,GO:0006807,GO:0008150,GO:0008152,GO:0008483,GO:0009058,GO:0009987,GO:0016053,GO:0016740,GO:0016769,GO:0018130,GO:0019491,GO:0019752,GO:0032787,GO:0042399,GO:0043436,GO:0044237,GO:0044249,GO:0044281,GO:0044283,GO:0046394,GO:0046483,GO:0071704,GO:0072330,GO:1901360,GO:1901362,GO:1901564,GO:1901566,GO:1901576	2.6.1.76	ko:K00836	ko00260,ko01100,ko01120,ko01210,ko01230,map00260,map01100,map01120,map01210,map01230	M00033	R06977	RC00006,RC00062	ko00000,ko00001,ko00002,ko01000,ko01007	-	-	-	Aminotran_3
PALA52_02832	287.DR97_6200	3.87e-210	582.0	COG2084@1|root,COG2084@2|Bacteria,1RC5B@1224|Proteobacteria,1TBNP@1236|Gammaproteobacteria,1YI98@136841|Pseudomonas aeruginosa group	1236|Gammaproteobacteria	I	NAD binding domain of 6-phosphogluconate dehydrogenase	-	-	-	-	-	-	-	-	-	-	-	-	NAD_binding_2
PALA52_02834	287.DR97_6202	0.0	1019.0	COG4147@1|root,COG4147@2|Bacteria,1MVJ8@1224|Proteobacteria,1RN0R@1236|Gammaproteobacteria,1YDXV@136841|Pseudomonas aeruginosa group	1236|Gammaproteobacteria	S	Sodium:solute symporter family	actP	-	-	ko:K14393	-	-	-	-	ko00000,ko02000	2.A.21.7	-	-	SSF
PALA52_02835	287.DR97_6203	5.29e-65	198.0	COG3162@1|root,COG3162@2|Bacteria	2|Bacteria	S	Protein of unknown function, DUF485	-	-	-	ko:K14393	-	-	-	-	ko00000,ko02000	2.A.21.7	-	-	DUF485
PALA52_02836	287.DR97_6204	0.0	1065.0	COG0318@1|root,COG0318@2|Bacteria,1MUMC@1224|Proteobacteria,1RPJW@1236|Gammaproteobacteria,1YCSK@136841|Pseudomonas aeruginosa group	1236|Gammaproteobacteria	IQ	AMP-binding enzyme C-terminal domain	-	-	-	ko:K00666	-	-	-	-	ko00000,ko01000,ko01004	-	-	-	AMP-binding,AMP-binding_C
PALA52_02837	287.DR97_6205	8.89e-170	475.0	COG1028@1|root,COG1028@2|Bacteria,1MWB6@1224|Proteobacteria,1RMZB@1236|Gammaproteobacteria,1YD1X@136841|Pseudomonas aeruginosa group	1236|Gammaproteobacteria	IQ	Enoyl-(Acyl carrier protein) reductase	-	-	-	-	-	-	-	-	-	-	-	-	adh_short_C2
PALA52_02838	287.DR97_6206	1.31e-289	790.0	COG1960@1|root,COG1960@2|Bacteria,1MU2V@1224|Proteobacteria,1RZSX@1236|Gammaproteobacteria,1YJ1K@136841|Pseudomonas aeruginosa group	1236|Gammaproteobacteria	I	Acyl-CoA dehydrogenase, C-terminal domain	-	-	1.3.8.7	ko:K00249	ko00071,ko00280,ko00410,ko00640,ko01100,ko01110,ko01130,ko01200,ko01212,ko03320,map00071,map00280,map00410,map00640,map01100,map01110,map01130,map01200,map01212,map03320	M00013,M00036,M00087	R00924,R01175,R01279,R02661,R03172,R03777,R03857,R03990,R04095,R04432,R04751,R04754	RC00052,RC00068,RC00076,RC00095,RC00148,RC00246	ko00000,ko00001,ko00002,ko01000	-	-	-	Acyl-CoA_dh_1,Acyl-CoA_dh_M,Acyl-CoA_dh_N
PALA52_02839	287.DR97_6207	2.59e-68	207.0	2DRYN@1|root,33DQH@2|Bacteria,1NIW2@1224|Proteobacteria,1SVPV@1236|Gammaproteobacteria,1YKE8@136841|Pseudomonas aeruginosa group	1236|Gammaproteobacteria	-	-	-	-	-	-	-	-	-	-	-	-	-	-	-
PALA52_02840	287.DR97_6208	1.01e-238	657.0	COG3173@1|root,COG3173@2|Bacteria,1MY0Y@1224|Proteobacteria,1S3A0@1236|Gammaproteobacteria,1YHE1@136841|Pseudomonas aeruginosa group	1236|Gammaproteobacteria	S	Phosphotransferase enzyme family	-	-	-	-	-	-	-	-	-	-	-	-	APH
PALA52_02841	287.DR97_6209	0.0	1230.0	COG3829@1|root,COG3829@2|Bacteria,1NU8B@1224|Proteobacteria,1RMHY@1236|Gammaproteobacteria,1YI10@136841|Pseudomonas aeruginosa group	1236|Gammaproteobacteria	KT	Propionate catabolism activator	prpR	GO:0003674,GO:0003700,GO:0006355,GO:0008150,GO:0009314,GO:0009628,GO:0009889,GO:0009890,GO:0009891,GO:0009892,GO:0009893,GO:0010468,GO:0010556,GO:0010557,GO:0010558,GO:0010604,GO:0010605,GO:0010628,GO:0010629,GO:0019219,GO:0019222,GO:0031323,GO:0031324,GO:0031325,GO:0031326,GO:0031327,GO:0031328,GO:0045892,GO:0045893,GO:0045934,GO:0045935,GO:0048518,GO:0048519,GO:0048522,GO:0048523,GO:0050789,GO:…	-	ko:K02688,ko:K11914	-	-	-	-	ko00000,ko02044,ko03000	-	-	-	HTH_8,PrpR_N,Sigma54_activat
PALA52_02842	287.DR97_6210	4.21e-111	320.0	2E3RZ@1|root,32YPK@2|Bacteria,1NJYT@1224|Proteobacteria,1SHP1@1236|Gammaproteobacteria,1YJNR@136841|Pseudomonas aeruginosa group	1236|Gammaproteobacteria	-	-	-	-	-	-	-	-	-	-	-	-	-	-	-
PALA52_02843	287.DR97_6211	0.0	1494.0	COG3008@1|root,COG3008@2|Bacteria,1MU1T@1224|Proteobacteria,1RN89@1236|Gammaproteobacteria,1YDYI@136841|Pseudomonas aeruginosa group	1236|Gammaproteobacteria	Q	MlaD protein	yebT	GO:0003674,GO:0005488,GO:0005515,GO:0005575,GO:0005623,GO:0005886,GO:0005887,GO:0006810,GO:0006869,GO:0008150,GO:0009987,GO:0010876,GO:0016020,GO:0016021,GO:0016043,GO:0030288,GO:0030313,GO:0031224,GO:0031226,GO:0031975,GO:0033036,GO:0042597,GO:0042802,GO:0044425,GO:0044459,GO:0044464,GO:0051179,GO:0051234,GO:0061024,GO:0071702,GO:0071840,GO:0071944,GO:0120009	-	ko:K06192	-	-	-	-	ko00000	-	-	-	MlaD
PALA52_02844	287.DR97_6212	1.76e-138	392.0	COG2995@1|root,COG2995@2|Bacteria,1MWG1@1224|Proteobacteria,1RM9Z@1236|Gammaproteobacteria,1YEIJ@136841|Pseudomonas aeruginosa group	1236|Gammaproteobacteria	S	paraquat-inducible protein A	yebS	GO:0005575,GO:0005623,GO:0005886,GO:0005887,GO:0006950,GO:0008150,GO:0009266,GO:0009408,GO:0009628,GO:0016020,GO:0016021,GO:0031224,GO:0031226,GO:0044425,GO:0044459,GO:0044464,GO:0050896,GO:0071944	-	ko:K03808	-	-	-	-	ko00000	-	-	-	PqiA
PALA52_02845	287.DR97_6213	0.0	1017.0	COG1012@1|root,COG1012@2|Bacteria,1MY2V@1224|Proteobacteria,1RQG6@1236|Gammaproteobacteria,1YEMN@136841|Pseudomonas aeruginosa group	1236|Gammaproteobacteria	C	Aldehyde dehydrogenase family	aldH	-	1.2.1.26	ko:K13877	ko00040,ko00053,map00040,map00053	-	R00264	RC00080	ko00000,ko00001,ko01000	-	-	-	Aldedh
PALA52_02846	287.DR97_6214	3.34e-244	670.0	COG3802@1|root,COG3802@2|Bacteria,1MYER@1224|Proteobacteria,1RNNM@1236|Gammaproteobacteria,1YDP8@136841|Pseudomonas aeruginosa group	1236|Gammaproteobacteria	S	protein conserved in bacteria	-	-	-	-	-	-	-	-	-	-	-	-	-
PALA52_02847	287.DR97_6215	3.38e-297	809.0	COG4948@1|root,COG4948@2|Bacteria,1MW5B@1224|Proteobacteria,1RSMH@1236|Gammaproteobacteria,1YKQE@136841|Pseudomonas aeruginosa group	1236|Gammaproteobacteria	M	Mandelate racemase / muconate lactonizing enzyme, C-terminal domain	rhmD	-	-	-	-	-	-	-	-	-	-	-	MR_MLE_C,MR_MLE_N
PALA52_02848	287.DR97_6216	3.51e-308	841.0	COG2271@1|root,COG2271@2|Bacteria,1MUEK@1224|Proteobacteria,1RMB4@1236|Gammaproteobacteria,1YHKH@136841|Pseudomonas aeruginosa group	1236|Gammaproteobacteria	G	Major Facilitator Superfamily	rhmT	-	-	-	-	-	-	-	-	-	-	-	MFS_1
PALA52_02849	287.DR97_6217	4.15e-297	811.0	2DBJX@1|root,2Z9P4@2|Bacteria,1MYUJ@1224|Proteobacteria,1RPQB@1236|Gammaproteobacteria,1YFRE@136841|Pseudomonas aeruginosa group	1236|Gammaproteobacteria	S	outer membrane porin, OprD family	-	-	-	-	-	-	-	-	-	-	-	-	OprD
PALA52_02850	287.DR97_6218	8.13e-239	657.0	COG1995@1|root,COG1995@2|Bacteria,1MXGJ@1224|Proteobacteria,1RZEQ@1236|Gammaproteobacteria,1YI5Q@136841|Pseudomonas aeruginosa group	1236|Gammaproteobacteria	H	Pyridoxal phosphate biosynthetic protein PdxA	-	-	1.1.1.262	ko:K00097	ko00750,ko01100,map00750,map01100	M00124	R05681,R05837,R07406	RC00089,RC00675,RC01475	ko00000,ko00001,ko00002,ko01000	-	-	-	PdxA
PALA52_02851	287.DR97_6219	1.21e-228	629.0	COG3618@1|root,COG3618@2|Bacteria,1MVG0@1224|Proteobacteria,1RNCH@1236|Gammaproteobacteria,1YIQF@136841|Pseudomonas aeruginosa group	1236|Gammaproteobacteria	S	Amidohydrolase	-	-	-	-	-	-	-	-	-	-	-	-	Amidohydro_2
PALA52_02852	287.DR97_6220	2.1e-305	834.0	COG2271@1|root,COG2271@2|Bacteria,1MVPS@1224|Proteobacteria,1RRJ8@1236|Gammaproteobacteria,1YIM7@136841|Pseudomonas aeruginosa group	1236|Gammaproteobacteria	G	Major Facilitator Superfamily	-	-	-	ko:K08194	-	-	-	-	ko00000,ko02000	2.A.1.14.7	-	-	MFS_1
PALA52_02853	287.DR97_6221	7.27e-242	664.0	COG3181@1|root,COG3181@2|Bacteria,1MXEX@1224|Proteobacteria,1S9CF@1236|Gammaproteobacteria,1YIM4@136841|Pseudomonas aeruginosa group	1236|Gammaproteobacteria	S	Tripartite tricarboxylate transporter family receptor	-	-	-	-	-	-	-	-	-	-	-	-	TctC
PALA52_02854	287.DR97_6222	1.98e-118	339.0	2BKYI@1|root,32FF5@2|Bacteria,1RB6X@1224|Proteobacteria,1TBZX@1236|Gammaproteobacteria,1YJJB@136841|Pseudomonas aeruginosa group	1236|Gammaproteobacteria	S	Tripartite tricarboxylate transporter TctB family	-	-	-	-	-	-	-	-	-	-	-	-	TctB
PALA52_02861	287.DR97_6229	4.38e-210	580.0	COG0384@1|root,COG0384@2|Bacteria,1NUZ4@1224|Proteobacteria	1224|Proteobacteria	S	Domain of unknown function (DUF1911)	-	-	-	-	-	-	-	-	-	-	-	-	DUF1911
PALA52_02862	287.DR97_6230	0.0	1011.0	COG4943@1|root,COG4943@2|Bacteria,1MVTH@1224|Proteobacteria,1RMDP@1236|Gammaproteobacteria,1YJSR@136841|Pseudomonas aeruginosa group	1236|Gammaproteobacteria	T	Putative diguanylate phosphodiesterase	yjcC	-	-	-	-	-	-	-	-	-	-	-	CSS-motif,EAL
PALA52_02870	1121105.ATXL01000051_gene426	2.09e-24	94.4	COG0366@1|root,COG0366@2|Bacteria,1TP53@1239|Firmicutes,4HA1G@91061|Bacilli,4B04N@81852|Enterococcaceae	91061|Bacilli	G	Alpha-amylase domain	-	-	3.2.1.70	ko:K01215	-	-	-	-	ko00000,ko01000	-	-	-	Alpha-amylase,Malt_amylase_C
PALA52_02871	287.DR97_6238	9.88e-91	266.0	COG0517@1|root,COG0517@2|Bacteria,1QF19@1224|Proteobacteria,1TC2C@1236|Gammaproteobacteria,1YJPP@136841|Pseudomonas aeruginosa group	1236|Gammaproteobacteria	S	Domain in cystathionine beta-synthase and other proteins.	-	-	-	-	-	-	-	-	-	-	-	-	CBS
PALA52_02872	1121943.KB899989_gene3245	6.35e-19	82.4	COG3729@1|root,COG3729@2|Bacteria,1N767@1224|Proteobacteria,1SCA5@1236|Gammaproteobacteria	1224|Proteobacteria	S	Stress-induced protein	-	-	-	ko:K06884	-	-	-	-	ko00000	-	-	-	KGG
PALA52_02873	287.DR97_6241	3.53e-134	379.0	COG0740@1|root,COG0740@2|Bacteria,1N6H3@1224|Proteobacteria,1SNC4@1236|Gammaproteobacteria,1YGAP@136841|Pseudomonas aeruginosa group	1236|Gammaproteobacteria	OU	Clp protease	-	-	-	-	-	-	-	-	-	-	-	-	CLP_protease
PALA52_02874	287.DR97_6242	5.42e-83	246.0	COG5478@1|root,COG5478@2|Bacteria,1MZMZ@1224|Proteobacteria,1S9ZW@1236|Gammaproteobacteria,1YJSB@136841|Pseudomonas aeruginosa group	1236|Gammaproteobacteria	S	Low affinity iron permease	-	-	-	-	-	-	-	-	-	-	-	-	Iron_permease
PALA52_02875	1226994.AMZB01000108_gene1814	1.19e-86	258.0	COG3685@1|root,COG3685@2|Bacteria,1R4MJ@1224|Proteobacteria,1S4T2@1236|Gammaproteobacteria,1YIIJ@136841|Pseudomonas aeruginosa group	1236|Gammaproteobacteria	S	Domain of unknown function (DUF892)	-	-	-	-	-	-	-	-	-	-	-	-	DUF892
PALA52_02876	1226994.AMZB01000108_gene1813	6.18e-35	121.0	COG3205@1|root,COG3205@2|Bacteria,1N85D@1224|Proteobacteria,1SCCN@1236|Gammaproteobacteria,1YKCP@136841|Pseudomonas aeruginosa group	1236|Gammaproteobacteria	S	Predicted membrane protein (DUF2061)	VP2647	-	-	-	-	-	-	-	-	-	-	-	DUF2061
PALA52_02877	1294143.H681_21365	3.01e-50	169.0	COG1294@1|root,COG1294@2|Bacteria,1MURP@1224|Proteobacteria,1RN0N@1236|Gammaproteobacteria	1236|Gammaproteobacteria	C	oxidase subunit	cioB	-	1.10.3.14	ko:K00426	ko00190,ko01100,ko02020,map00190,map01100,map02020	M00153	R11325	RC00061	ko00000,ko00001,ko00002,ko01000	3.D.4.3	-	-	Cyt_bd_oxida_II
PALA52_02885	287.DR97_6250	1.07e-70	213.0	2AS5I@1|root,31HIF@2|Bacteria,1QF97@1224|Proteobacteria,1TCED@1236|Gammaproteobacteria,1YK8U@136841|Pseudomonas aeruginosa group	1236|Gammaproteobacteria	-	-	-	-	-	-	-	-	-	-	-	-	-	-	-
PALA52_02887	287.DR97_6252	1.82e-45	146.0	2ASAE@1|root,31HPN@2|Bacteria,1QFED@1224|Proteobacteria,1TCN8@1236|Gammaproteobacteria,1YKGG@136841|Pseudomonas aeruginosa group	1236|Gammaproteobacteria	-	-	-	-	-	-	-	-	-	-	-	-	-	-	-
PALA52_02889	287.DR97_6254	1.18e-253	696.0	COG1363@1|root,COG1363@2|Bacteria,1QDTW@1224|Proteobacteria,1T9YX@1236|Gammaproteobacteria,1YIIA@136841|Pseudomonas aeruginosa group	1236|Gammaproteobacteria	E	M42 glutamyl aminopeptidase	-	-	-	-	-	-	-	-	-	-	-	-	Peptidase_M42
PALA52_02891	287.DR97_6256	3.54e-39	130.0	2A3JM@1|root,30S2N@2|Bacteria,1QEIZ@1224|Proteobacteria,1TBA5@1236|Gammaproteobacteria,1YH59@136841|Pseudomonas aeruginosa group	1236|Gammaproteobacteria	S	Phospholipase_D-nuclease N-terminal	-	-	-	-	-	-	-	-	-	-	-	-	PLDc_N
PALA52_02895	287.DR97_6260	2.88e-80	238.0	2BQ73@1|root,32J1Q@2|Bacteria,1QF9T@1224|Proteobacteria,1TCF5@1236|Gammaproteobacteria,1YK9K@136841|Pseudomonas aeruginosa group	1236|Gammaproteobacteria	S	Protein of unknown function (DUF3509)	-	-	-	-	-	-	-	-	-	-	-	-	DUF3509
PALA52_02897	287.DR97_6262	0.0	1186.0	COG0296@1|root,COG0296@2|Bacteria,1MVM7@1224|Proteobacteria,1RP2N@1236|Gammaproteobacteria,1YFJ8@136841|Pseudomonas aeruginosa group	1236|Gammaproteobacteria	G	Domain of unknown function (DUF3459)	treZ	-	2.4.1.18,3.2.1.141	ko:K00700,ko:K01236	ko00500,ko01100,ko01110,map00500,map01100,map01110	M00565	R02110,R09995,R11256	RC00049	ko00000,ko00001,ko00002,ko01000,ko04147	-	CBM48,GH13	-	Alpha-amylase,CBM_48,DUF3459
PALA52_02901	287.DR97_6266	0.0	1514.0	COG1523@1|root,COG1523@2|Bacteria,1MU19@1224|Proteobacteria,1RP6F@1236|Gammaproteobacteria,1YF22@136841|Pseudomonas aeruginosa group	1236|Gammaproteobacteria	G	Belongs to the glycosyl hydrolase 13 family	glgX	-	3.2.1.41,3.2.1.68	ko:K01200,ko:K01214	ko00500,ko01100,ko01110,map00500,map01100,map01110	M00565	R02111,R09995,R11261	-	ko00000,ko00001,ko00002,ko01000	-	CBM48,GH13	-	Alpha-amylase,CBM_48
PALA52_02905	287.DR97_6270	3.56e-180	501.0	COG3568@1|root,COG3568@2|Bacteria,1MVN7@1224|Proteobacteria,1RNSP@1236|Gammaproteobacteria,1YFM1@136841|Pseudomonas aeruginosa group	1236|Gammaproteobacteria	L	Endonuclease/Exonuclease/phosphatase family	ybhP	-	-	-	-	-	-	-	-	-	-	-	Exo_endo_phos
PALA52_02923	287.DR97_6287	1.99e-202	560.0	COG1028@1|root,COG1028@2|Bacteria,1MW9A@1224|Proteobacteria,1RMC9@1236|Gammaproteobacteria,1YD80@136841|Pseudomonas aeruginosa group	1236|Gammaproteobacteria	IQ	KR domain	-	-	-	-	-	-	-	-	-	-	-	-	adh_short_C2
PALA52_02924	287.DR97_6288	5.26e-112	322.0	COG1546@1|root,COG1546@2|Bacteria,1RHJI@1224|Proteobacteria,1SA6C@1236|Gammaproteobacteria,1YKWM@136841|Pseudomonas aeruginosa group	1236|Gammaproteobacteria	S	Competence-damaged protein	-	-	-	-	-	-	-	-	-	-	-	-	CinA
PALA52_02929	287.DR97_5715	1.24e-120	344.0	2DMPG@1|root,32SVV@2|Bacteria,1N3GD@1224|Proteobacteria,1S933@1236|Gammaproteobacteria,1YH0K@136841|Pseudomonas aeruginosa group	1236|Gammaproteobacteria	-	-	-	-	-	-	-	-	-	-	-	-	-	-	-
PALA52_02934	287.DR97_5720	7.69e-142	401.0	COG3121@1|root,COG3121@2|Bacteria,1RHGU@1224|Proteobacteria,1S73B@1236|Gammaproteobacteria,1YJHK@136841|Pseudomonas aeruginosa group	1236|Gammaproteobacteria	NU	Pili assembly chaperone PapD, C-terminal domain	-	-	-	-	-	-	-	-	-	-	-	-	PapD_C,PapD_N
PALA52_02935	287.DR97_5721	0.0	889.0	COG3539@1|root,COG3539@2|Bacteria,1PAZ3@1224|Proteobacteria,1RRDN@1236|Gammaproteobacteria,1YIW6@136841|Pseudomonas aeruginosa group	1236|Gammaproteobacteria	NU	Fimbrial protein	stbD	-	-	-	-	-	-	-	-	-	-	-	Fimbrial
PALA52_02939	287.DR97_5725	0.0	863.0	COG3969@1|root,COG3969@2|Bacteria,1NBDM@1224|Proteobacteria,1RYRP@1236|Gammaproteobacteria	1236|Gammaproteobacteria	S	phosphoadenosine phosphosulfate	ybdN	-	-	-	-	-	-	-	-	-	-	-	DUF3440,PAPS_reduct
PALA52_02944	287.DR97_5733	2e-265	726.0	COG1063@1|root,COG1063@2|Bacteria,1MW6Y@1224|Proteobacteria,1SYDH@1236|Gammaproteobacteria,1YHHV@136841|Pseudomonas aeruginosa group	1236|Gammaproteobacteria	E	Zinc-binding dehydrogenase	adh	-	-	ko:K18369	ko00640,map00640	-	R10703	RC00545	ko00000,ko00001,ko01000	-	-	-	ADH_N,ADH_zinc_N
PALA52_02945	287.DR97_5734	1.38e-45	147.0	2DEQE@1|root,2ZNU1@2|Bacteria,1QDNZ@1224|Proteobacteria,1SVKT@1236|Gammaproteobacteria,1YH8Y@136841|Pseudomonas aeruginosa group	1236|Gammaproteobacteria	G	Protein of unknown function (DUF2790)	-	-	-	-	-	-	-	-	-	-	-	-	DUF2790
PALA52_02983	287.DR97_5773	4.67e-263	736.0	COG4372@1|root,COG4372@2|Bacteria,1QED1@1224|Proteobacteria,1TAYZ@1236|Gammaproteobacteria,1YGT1@136841|Pseudomonas aeruginosa group	1236|Gammaproteobacteria	S	Transposase	-	-	-	-	-	-	-	-	-	-	-	-	-
PALA52_02984	273526.SMDB11_0895	2.56e-142	407.0	COG0388@1|root,COG0388@2|Bacteria,1RA15@1224|Proteobacteria,1S30A@1236|Gammaproteobacteria	1236|Gammaproteobacteria	S	Nitrilase cyanide hydratase and apolipoprotein N-acyltransferase	-	-	-	-	-	-	-	-	-	-	-	-	CN_hydrolase
PALA52_02985	273526.SMDB11_0894	8.34e-279	769.0	COG1457@1|root,COG1457@2|Bacteria,1N7JP@1224|Proteobacteria,1SZP8@1236|Gammaproteobacteria,405PX@613|Serratia	1236|Gammaproteobacteria	U	PFAM Permease for cytosine purines, uracil, thiamine, allantoin	-	-	-	ko:K03457	-	-	-	-	ko00000	2.A.39	-	-	Transp_cyt_pur
PALA52_02987	1395516.PMO01_15625	1.2e-61	198.0	COG3647@1|root,COG3647@2|Bacteria,1N7NB@1224|Proteobacteria,1S6G7@1236|Gammaproteobacteria	1236|Gammaproteobacteria	S	Membrane	yjdF	-	-	ko:K08984	-	-	-	-	ko00000	-	-	-	DUF2238
PALA52_02988	287.DR97_5774	0.0	1586.0	COG3322@1|root,COG5001@1|root,COG3322@2|Bacteria,COG5001@2|Bacteria,1MU2C@1224|Proteobacteria,1RM8A@1236|Gammaproteobacteria,1YIZB@136841|Pseudomonas aeruginosa group	1236|Gammaproteobacteria	T	CHASE4 domain	-	-	-	-	-	-	-	-	-	-	-	-	CHASE4,EAL,GGDEF,HAMP,PAS,PAS_4,PAS_8,sCache_3_2
PALA52_02994	287.DR97_5781	0.0	1162.0	COG2132@1|root,COG2132@2|Bacteria,1MU0J@1224|Proteobacteria,1RQ4N@1236|Gammaproteobacteria,1YCZP@136841|Pseudomonas aeruginosa group	1236|Gammaproteobacteria	Q	Multicopper oxidase	copA	-	-	-	-	-	-	-	-	-	-	-	CopB,Cu-oxidase,Cu-oxidase_2,Cu-oxidase_3
PALA52_02995	287.DR97_5782	1.09e-218	607.0	COG3667@1|root,COG3667@2|Bacteria,1MXW6@1224|Proteobacteria,1RZEY@1236|Gammaproteobacteria,1YG2V@136841|Pseudomonas aeruginosa group	1236|Gammaproteobacteria	P	Copper resistance protein B precursor (CopB)	copB	-	-	ko:K07233	-	-	-	-	ko00000	-	-	-	CopB
PALA52_03011	287.DR97_5797	9.92e-313	860.0	COG3540@1|root,COG3540@2|Bacteria,1MW0G@1224|Proteobacteria,1RP8H@1236|Gammaproteobacteria,1YFDY@136841|Pseudomonas aeruginosa group	1236|Gammaproteobacteria	P	Isoleucyl-tRNA synthetase	-	-	-	-	-	-	-	-	-	-	-	-	PhoD
PALA52_03012	287.DR97_5798	1.72e-59	184.0	COG1359@1|root,COG1359@2|Bacteria	2|Bacteria	S	Antibiotic biosynthesis monooxygenase	-	-	-	-	-	-	-	-	-	-	-	-	ABM
PALA52_03016	287.DR97_5803	0.0	1244.0	COG1305@1|root,COG1305@2|Bacteria,1R5Q7@1224|Proteobacteria,1RM8K@1236|Gammaproteobacteria	1236|Gammaproteobacteria	E	Domain of Unknown Function with PDB structure (DUF3857)	-	-	-	-	-	-	-	-	-	-	-	-	DUF3857,Transglut_core
PALA52_03033	287.DR97_5822	0.0	880.0	COG1249@1|root,COG1249@2|Bacteria,1MU2Z@1224|Proteobacteria,1RMC0@1236|Gammaproteobacteria,1YDRH@136841|Pseudomonas aeruginosa group	1236|Gammaproteobacteria	C	Belongs to the class-I pyridine nucleotide-disulfide oxidoreductase family	gor	GO:0000166,GO:0003674,GO:0003824,GO:0004362,GO:0005488,GO:0005575,GO:0005622,GO:0005623,GO:0005737,GO:0008150,GO:0008152,GO:0009636,GO:0009987,GO:0015036,GO:0015037,GO:0015038,GO:0016209,GO:0016491,GO:0016651,GO:0016667,GO:0016668,GO:0036094,GO:0042221,GO:0043167,GO:0043168,GO:0044424,GO:0044464,GO:0048037,GO:0050660,GO:0050662,GO:0050896,GO:0051716,GO:0055114,GO:0070887,GO:0071949,GO:0097159,GO:…	1.8.1.7	ko:K00383	ko00480,ko04918,map00480,map04918	-	R00094,R00115	RC00011	ko00000,ko00001,ko01000	-	-	iZ_1308.Z4900	Pyr_redox_2,Pyr_redox_dim
PALA52_03038	287.DR97_5827	6.38e-143	404.0	COG1309@1|root,COG1309@2|Bacteria,1RGQM@1224|Proteobacteria	1224|Proteobacteria	K	TRANSCRIPTIONal	amrR	-	-	ko:K18129	ko01501,map01501	M00643	-	-	ko00000,ko00001,ko00002,ko01504,ko03000	-	-	-	TetR_C_2,TetR_N
PALA52_03041	292.DM42_74	1.3e-163	478.0	COG1538@1|root,COG1538@2|Bacteria,1MUA8@1224|Proteobacteria,2VI5V@28216|Betaproteobacteria,1K34A@119060|Burkholderiaceae	28216|Betaproteobacteria	MU	outer_NodT efflux transporter, outer membrane factor (OMF) lipo, NodT family protein	oprM	-	-	ko:K18139	ko01501,ko02024,map01501,map02024	M00642,M00643,M00647,M00718,M00768,M00822	-	-	ko00000,ko00001,ko00002,ko01504,ko02000	1.B.17,2.A.6.2	-	-	OEP
PALA52_03042	287.DR97_5831	2.59e-189	529.0	COG3204@1|root,COG3204@2|Bacteria,1Q04B@1224|Proteobacteria,1S0FI@1236|Gammaproteobacteria,1YF2P@136841|Pseudomonas aeruginosa group	1236|Gammaproteobacteria	S	Esterase-like activity of phytase	-	-	-	-	-	-	-	-	-	-	-	-	SdiA-regulated
PALA52_03065	1294143.H681_13245	4.92e-87	260.0	COG3554@1|root,COG3554@2|Bacteria,1RJAA@1224|Proteobacteria	1224|Proteobacteria	S	Putative glycolipid-binding	-	-	-	ko:K09957	-	-	-	-	ko00000	-	-	-	Glycolipid_bind
PALA52_03087	287.DR97_5875	0.0	1367.0	COG1025@1|root,COG1025@2|Bacteria,1QTVC@1224|Proteobacteria,1T1IG@1236|Gammaproteobacteria,1YFET@136841|Pseudomonas aeruginosa group	1236|Gammaproteobacteria	O	Insulinase (Peptidase family M16)	pqqF	-	-	-	-	-	-	-	-	-	-	-	Peptidase_M16,Peptidase_M16_C
PALA52_03095	246196.MSMEI_2031	3.55e-90	269.0	COG2320@1|root,COG2320@2|Bacteria,2ICDV@201174|Actinobacteria,23D54@1762|Mycobacteriaceae	201174|Actinobacteria	S	GrpB protein	-	-	-	-	-	-	-	-	-	-	-	-	GrpB
PALA52_03097	640513.Entas_2657	5.9e-92	286.0	COG1835@1|root,COG1835@2|Bacteria,1PGAW@1224|Proteobacteria,1SIFA@1236|Gammaproteobacteria	1236|Gammaproteobacteria	I	Acyltransferase family	-	-	-	-	-	-	-	-	-	-	-	-	Acyl_transf_3
PALA52_03098	504346.B5WZU0_BPPAJ	0.0	1228.0	4QAS2@10239|Viruses,4QVP3@35237|dsDNA viruses no RNA stage,4QQ5W@28883|Caudovirales	28883|Caudovirales	S	transferase activity, transferring acyl groups other than amino-acyl groups	-	-	-	-	-	-	-	-	-	-	-	-	-
PALA52_03099	1191380.J7HXC4_9CAUD	1.07e-173	491.0	4QAQE@10239|Viruses,4QUYF@35237|dsDNA viruses no RNA stage,4QPDM@28883|Caudovirales,4QKN9@10699|Siphoviridae	10699|Siphoviridae	S	Phage integrase family	-	GO:0006139,GO:0006259,GO:0006725,GO:0006807,GO:0008150,GO:0008152,GO:0009987,GO:0015074,GO:0034641,GO:0043170,GO:0044237,GO:0044238,GO:0044260,GO:0046483,GO:0071704,GO:0090304,GO:1901360	-	-	-	-	-	-	-	-	-	-	-
PALA52_03108	287.DR97_5892	2.31e-90	267.0	2BGGB@1|root,32AEC@2|Bacteria,1QF2Y@1224|Proteobacteria,1TC51@1236|Gammaproteobacteria,1YJVP@136841|Pseudomonas aeruginosa group	1236|Gammaproteobacteria	-	-	-	-	-	-	-	-	-	-	-	-	-	-	-
PALA52_03110	287.DR97_5894	2.04e-211	588.0	2DM0S@1|root,317K8@2|Bacteria,1RM4S@1224|Proteobacteria,1S7UJ@1236|Gammaproteobacteria,1YHMP@136841|Pseudomonas aeruginosa group	1236|Gammaproteobacteria	-	-	-	-	-	-	-	-	-	-	-	-	-	-	-
PALA52_03126	287.DR97_5912	0.0	1414.0	COG1529@1|root,COG1529@2|Bacteria,1MUEA@1224|Proteobacteria,1RN40@1236|Gammaproteobacteria,1YEX4@136841|Pseudomonas aeruginosa group	1236|Gammaproteobacteria	C	Aldehyde oxidase and xanthine dehydrogenase, a/b hammerhead domain	yagR	-	1.17.1.4	ko:K11177	ko00230,ko01100,ko01120,map00230,map01100,map01120	M00546	R01768,R02103	RC00143	ko00000,ko00001,ko00002,ko01000	-	-	-	Ald_Xan_dh_C,Ald_Xan_dh_C2
PALA52_03127	287.DR97_5913	2.07e-237	652.0	COG1319@1|root,COG1319@2|Bacteria,1MVJS@1224|Proteobacteria,1RY6A@1236|Gammaproteobacteria,1YFRJ@136841|Pseudomonas aeruginosa group	1236|Gammaproteobacteria	C	CO dehydrogenase flavoprotein C-terminal domain	yagS	-	1.17.1.4	ko:K11178	ko00230,ko01100,ko01120,map00230,map01100,map01120	M00546	R01768,R02103	RC00143	ko00000,ko00001,ko00002,ko01000	-	-	-	CO_deh_flav_C,FAD_binding_5
PALA52_03128	287.DR97_5914	3.33e-123	350.0	COG2080@1|root,COG2080@2|Bacteria,1RDAS@1224|Proteobacteria,1S3X7@1236|Gammaproteobacteria,1YG85@136841|Pseudomonas aeruginosa group	1236|Gammaproteobacteria	C	[2Fe-2S] binding domain	yagT	-	1.2.5.3,1.3.99.8	ko:K03518,ko:K13483,ko:K16879	ko00230,ko00365,ko01100,ko01120,map00230,map00365,map01100,map01120	M00546	R01768,R02103,R02987,R11168	RC00143,RC01856,RC02800	ko00000,ko00001,ko00002,ko01000	-	-	-	Fer2,Fer2_2
PALA52_03137	287.DR97_5923	0.0	1295.0	COG1629@1|root,COG4771@2|Bacteria,1MUC1@1224|Proteobacteria,1RNHR@1236|Gammaproteobacteria,1YE9T@136841|Pseudomonas aeruginosa group	1236|Gammaproteobacteria	P	Outer membrane protein beta-barrel family	-	-	-	ko:K16089,ko:K19611	ko02020,map02020	-	-	-	ko00000,ko00001,ko02000	1.B.14.1,1.B.14.1.22,1.B.14.1.3,1.B.14.1.5,1.B.14.10	-	-	Plug,TonB_dep_Rec
PALA52_03151	287.DR97_3695	2.08e-159	446.0	COG0259@1|root,COG0259@2|Bacteria,1RJT8@1224|Proteobacteria,1S7ZD@1236|Gammaproteobacteria	1236|Gammaproteobacteria	H	Pyridoxine 5'-phosphate oxidase C-terminal dimerisation region	ehpE	-	1.10.3.16	ko:K20262	ko00405,ko01130,ko02024,map00405,map01130,map02024	M00835	R11490,R11491,R11492	RC03450,RC03451	ko00000,ko00001,ko00002,ko01000	-	-	-	PNP_phzG_C,Putative_PNPOx
PALA52_03152	287.DR97_3696	8.8e-202	558.0	COG0384@1|root,COG0384@2|Bacteria,1MUAS@1224|Proteobacteria,1S11P@1236|Gammaproteobacteria	1236|Gammaproteobacteria	S	Phenazine biosynthesis-like protein	-	-	5.3.3.17	ko:K06998	ko00405,ko01130,ko02024,map00405,map01130,map02024	M00835	-	-	ko00000,ko00001,ko00002,ko01000	-	-	-	PhzC-PhzF
PALA52_03153	287.DR97_3697	0.0	1214.0	COG0147@1|root,COG0512@1|root,COG0147@2|Bacteria,COG0512@2|Bacteria,1R3RU@1224|Proteobacteria,1RSHJ@1236|Gammaproteobacteria	1236|Gammaproteobacteria	EH	chorismate binding enzyme	ehpC	-	2.6.1.86	ko:K13063	ko00405,ko01130,ko02024,map00405,map01130,map02024	M00835	R08956	RC00010,RC02387	ko00000,ko00001,ko00002,ko01000	-	-	-	Chorismate_bind,GATase
PALA52_03155	287.DR97_3699	7.99e-294	801.0	COG3200@1|root,COG3200@2|Bacteria,1MUWF@1224|Proteobacteria,1RRMM@1236|Gammaproteobacteria,1YES6@136841|Pseudomonas aeruginosa group	1236|Gammaproteobacteria	E	phospho-2-dehydro-3-deoxyheptonate aldolase	phzC	-	2.5.1.54	ko:K01626	ko00400,ko01100,ko01110,ko01130,ko01230,ko02024,map00400,map01100,map01110,map01130,map01230,map02024	M00022	R01826	RC00435	ko00000,ko00001,ko00002,ko01000	-	-	-	DAHP_synth_2
PALA52_03156	287.DR97_5947	6.3e-124	352.0	COG3631@1|root,COG3631@2|Bacteria,1RF40@1224|Proteobacteria,1S3ZH@1236|Gammaproteobacteria	1236|Gammaproteobacteria	S	Phenazine biosynthesis protein A/B	phzB	-	-	ko:K20260	ko00405,ko01130,ko02024,map00405,map01130,map02024	M00835	R11493	RC03452	ko00000,ko00001,ko00002	-	-	-	PHZA_PHZB
PALA52_03161	287.DR97_5952	0.0	901.0	COG3239@1|root,COG3239@2|Bacteria,1RKGD@1224|Proteobacteria,1SBG9@1236|Gammaproteobacteria	1236|Gammaproteobacteria	I	Fatty acid desaturase	-	-	-	-	-	-	-	-	-	-	-	-	FA_desaturase
PALA52_03169	287.DR97_5960	5.29e-205	567.0	COG0329@1|root,COG0329@2|Bacteria,1R45B@1224|Proteobacteria,1RS1N@1236|Gammaproteobacteria,1YFF2@136841|Pseudomonas aeruginosa group	1236|Gammaproteobacteria	E	Catalyzes the condensation of (S)-aspartate-beta- semialdehyde (S)-ASA and pyruvate to 4-hydroxy- tetrahydrodipicolinate (HTPA)	-	-	4.3.3.7	ko:K01714	ko00261,ko00300,ko01100,ko01110,ko01120,ko01130,ko01230,map00261,map00300,map01100,map01110,map01120,map01130,map01230	M00016,M00525,M00526,M00527	R10147	RC03062,RC03063	ko00000,ko00001,ko00002,ko01000	-	-	-	DHDPS
PALA52_03179	384676.PSEEN3588	1.51e-92	287.0	COG0665@1|root,COG0665@2|Bacteria,1R4U7@1224|Proteobacteria,1SPR3@1236|Gammaproteobacteria	1236|Gammaproteobacteria	E	FAD dependent oxidoreductase	-	-	-	-	-	-	-	-	-	-	-	-	DAO
PALA52_03183	287.DR97_5973	0.0	2719.0	COG2911@1|root,COG3209@1|root,COG2911@2|Bacteria,COG3209@2|Bacteria,1P8N9@1224|Proteobacteria,1T1IH@1236|Gammaproteobacteria	1236|Gammaproteobacteria	D	PFAM FecR protein	-	-	-	ko:K20276	ko02024,map02024	-	-	-	ko00000,ko00001	-	-	-	Big_3_2,Big_3_3
PALA52_03186	287.DR97_4	6.06e-291	795.0	COG0739@1|root,COG0739@2|Bacteria,1R6RZ@1224|Proteobacteria,1RP73@1236|Gammaproteobacteria	1236|Gammaproteobacteria	M	COG0739 Membrane proteins related to metalloendopeptidases	lasA	-	-	ko:K08642	ko02024,map02024	-	-	-	ko00000,ko00001,ko01000,ko01002	-	-	-	PPC,Peptidase_M23
PALA52_03188	287.DR97_6	2.21e-42	139.0	COG0236@1|root,COG0236@2|Bacteria	2|Bacteria	IQ	Carrier of the growing fatty acid chain in fatty acid biosynthesis	acpP	GO:0000035,GO:0000036,GO:0003674,GO:0005488,GO:0005575,GO:0005622,GO:0005623,GO:0005737,GO:0005829,GO:0005975,GO:0006082,GO:0006629,GO:0006631,GO:0006633,GO:0006643,GO:0006644,GO:0006664,GO:0006793,GO:0006796,GO:0008150,GO:0008152,GO:0008610,GO:0008654,GO:0009058,GO:0009245,GO:0009247,GO:0009311,GO:0009312,GO:0009987,GO:0016051,GO:0016053,GO:0019637,GO:0019752,GO:0019842,GO:0031177,GO:0032787,GO:…	-	ko:K02078	-	-	-	-	ko00000,ko00001	-	-	-	PP-binding
PALA52_03217	287.DR97_36	4.55e-100	291.0	COG3760@1|root,COG3760@2|Bacteria,1RDIG@1224|Proteobacteria,1S5WN@1236|Gammaproteobacteria	1236|Gammaproteobacteria	S	Aminoacyl-tRNA editing domain	-	-	-	ko:K19055	-	-	-	-	ko00000,ko01000,ko03016	-	-	-	tRNA_edit
PALA52_03265	1163398.AJJP01000150_gene2885	3.85e-101	301.0	COG3713@1|root,COG3713@2|Bacteria,1NCB9@1224|Proteobacteria,1RQV7@1236|Gammaproteobacteria	1236|Gammaproteobacteria	M	MltA-interacting MipA family protein	-	-	-	-	-	-	-	-	-	-	-	-	MipA
PALA52_03289	287.DR97_107	0.0	1810.0	COG0243@1|root,COG1251@1|root,COG0243@2|Bacteria,COG1251@2|Bacteria,1NS3T@1224|Proteobacteria,1RMWN@1236|Gammaproteobacteria,1YCVV@136841|Pseudomonas aeruginosa group	1236|Gammaproteobacteria	C	Belongs to the prokaryotic molybdopterin-containing oxidoreductase family	nasA	GO:0005575,GO:0005622,GO:0005623,GO:0005737,GO:0044424,GO:0044464	1.8.1.2	ko:K00372,ko:K00380	ko00910,ko00920,ko01100,ko01120,map00910,map00920,map01100,map01120	M00176,M00531	R00798,R00858,R01106	RC00065,RC02812	ko00000,ko00001,ko00002,ko01000	-	-	-	Fer2_BFD,Molybdop_Fe4S4,Molybdopterin,Molydop_binding
PALA52_03344	287.DR97_197	2.96e-59	194.0	COG4792@1|root,COG4792@2|Bacteria,1PD5Z@1224|Proteobacteria,1RXQ4@1236|Gammaproteobacteria,1YJZI@136841|Pseudomonas aeruginosa group	1236|Gammaproteobacteria	U	FlhB HrpN YscU SpaS Family	-	-	-	ko:K03229	ko03070,map03070	M00332,M00542,M00660	-	-	ko00000,ko00001,ko00002,ko02044	3.A.6.1,3.A.6.3	-	-	Bac_export_2
PALA52_03363	287.DR97_216	1.15e-77	232.0	COG3324@1|root,COG3324@2|Bacteria,1N7Q5@1224|Proteobacteria,1SCXZ@1236|Gammaproteobacteria	1236|Gammaproteobacteria	S	glyoxalase bleomycin resistance protein dioxygenase	-	-	-	ko:K06996	-	-	-	-	ko00000	-	-	-	Glyoxalase
PALA52_03376	1221522.B723_19160	1.64e-17	78.6	COG4104@1|root,COG4104@2|Bacteria	2|Bacteria	T	PAAR repeat-containing protein	-	-	-	-	-	-	-	-	-	-	-	-	DUF2235,PAAR_motif
PALA52_03430	287.DR97_282	2.18e-96	281.0	COG1733@1|root,COG1733@2|Bacteria,1RIZT@1224|Proteobacteria,1S5HB@1236|Gammaproteobacteria	1236|Gammaproteobacteria	K	transcriptional regulators	-	-	-	-	-	-	-	-	-	-	-	-	HxlR
PALA52_03447	1294143.H681_13940	1.15e-261	723.0	COG1114@1|root,COG1114@2|Bacteria,1MVIF@1224|Proteobacteria,1RR3P@1236|Gammaproteobacteria	1236|Gammaproteobacteria	U	Component of the transport system for branched-chain amino acids	brnQ	GO:0003333,GO:0003674,GO:0005215,GO:0005304,GO:0005342,GO:0005575,GO:0005623,GO:0005886,GO:0006810,GO:0006811,GO:0006812,GO:0006820,GO:0006855,GO:0006865,GO:0008150,GO:0008324,GO:0008509,GO:0008514,GO:0015075,GO:0015171,GO:0015175,GO:0015179,GO:0015188,GO:0015190,GO:0015238,GO:0015318,GO:0015658,GO:0015711,GO:0015803,GO:0015804,GO:0015807,GO:0015818,GO:0015820,GO:0015829,GO:0015849,GO:0015893,GO:…	-	ko:K03311	-	-	-	-	ko00000	2.A.26	-	iAF1260.b0401,iB21_1397.B21_00353,iBWG_1329.BWG_0283,iEC042_1314.EC042_0433,iECBD_1354.ECBD_3260,iECB_1328.ECB_00349,iECDH10B_1368.ECDH10B_0357,iECDH1ME8569_1439.ECDH1ME8569_0386,iECDH1ME8569_1439.EcDH1_3208,iECD_1391.ECD_00349,iECH74115_1262.ECH74115_0478,iECIAI1_1343.ECIAI1_0401,iECO103_1326.ECO103_0375,iECO111_1330.ECO111_0430,iECO26_1355.ECO26_0433,iECSE_1348.ECSE_0422,iECSP_1301.ECSP_0465,iE…	Branch_AA_trans
PALA52_03494	287.DR97_391	8.82e-42	143.0	2E8VV@1|root,33364@2|Bacteria,1NGU9@1224|Proteobacteria,1SIKD@1236|Gammaproteobacteria,1YH3F@136841|Pseudomonas aeruginosa group	1236|Gammaproteobacteria	-	-	-	-	-	-	-	-	-	-	-	-	-	-	-
PALA52_03498	287.DR97_395	3.61e-70	213.0	COG2076@1|root,COG2076@2|Bacteria,1RJKJ@1224|Proteobacteria,1S6SR@1236|Gammaproteobacteria,1YGHK@136841|Pseudomonas aeruginosa group	1236|Gammaproteobacteria	P	Small Multidrug Resistance protein	mdtJ	GO:0003674,GO:0005215,GO:0005326,GO:0005575,GO:0005623,GO:0005886,GO:0005887,GO:0006810,GO:0006811,GO:0006812,GO:0006836,GO:0008150,GO:0008324,GO:0008519,GO:0015075,GO:0015101,GO:0015199,GO:0015203,GO:0015220,GO:0015291,GO:0015297,GO:0015606,GO:0015651,GO:0015695,GO:0015696,GO:0015697,GO:0015838,GO:0015846,GO:0015848,GO:0015871,GO:0016020,GO:0016021,GO:0022804,GO:0022857,GO:0031224,GO:0031226,GO:…	-	ko:K11743	-	M00711	-	-	ko00000,ko00002,ko02000	2.A.7.1.9	-	iAPECO1_1312.APECO1_683,iB21_1397.B21_01559,iBWG_1329.BWG_1415,iEC042_1314.EC042_1748,iEC55989_1330.EC55989_1765,iECBD_1354.ECBD_2046,iECB_1328.ECB_01569,iECDH10B_1368.ECDH10B_1733,iECDH1ME8569_1439.ECDH1ME8569_1543,iECD_1391.ECD_01569,iECED1_1282.ECED1_1769,iECH74115_1262.ECH74115_2310,iECIAI1_1343.ECIAI1_1650,iECNA114_1301.ECNA114_1647,iECO111_1330.ECO111_2069,iECO26_1355.ECO26_2304,iECOK1_1307…	Multi_Drug_Res
PALA52_03519	287.DR97_3215	1.33e-184	513.0	COG2801@1|root,COG2801@2|Bacteria,1PUMN@1224|Proteobacteria,1RYSS@1236|Gammaproteobacteria	1236|Gammaproteobacteria	L	PFAM Integrase catalytic region	-	-	-	ko:K07497	-	-	-	-	ko00000	-	-	-	HTH_21,rve,rve_3
PALA52_03520	1388763.O165_003985	1.14e-31	113.0	COG2963@1|root,COG2963@2|Bacteria,1RI5G@1224|Proteobacteria,1S8QB@1236|Gammaproteobacteria,1YZHK@136845|Pseudomonas putida group	1236|Gammaproteobacteria	L	Evidence 2b Function of strongly homologous gene	-	-	-	-	-	-	-	-	-	-	-	-	HTH_28
PALA52_03530	287.DR97_511	0.0	1611.0	COG3501@1|root,COG4253@1|root,COG3501@2|Bacteria,COG4253@2|Bacteria,1MU7Q@1224|Proteobacteria,1RN6G@1236|Gammaproteobacteria,1YI7R@136841|Pseudomonas aeruginosa group	1236|Gammaproteobacteria	S	Uncharacterized protein conserved in bacteria (DUF2345)	-	-	-	ko:K11904	ko03070,map03070	M00334	-	-	ko00000,ko00001,ko00002,ko02044	3.A.23.1	-	-	DUF2345,Phage_GPD,T6SS_Vgr
PALA52_03531	287.DR97_512	0.0	1090.0	COG1075@1|root,COG1075@2|Bacteria,1RAUT@1224|Proteobacteria,1RPQ0@1236|Gammaproteobacteria	1236|Gammaproteobacteria	S	acetyltransferases and hydrolases with the alpha beta hydrolase fold	-	-	-	-	-	-	-	-	-	-	-	-	LCAT,PGAP1
PALA52_03532	287.DR97_513	9.59e-225	625.0	28NB1@1|root,2ZBEK@2|Bacteria,1MXV0@1224|Proteobacteria,1SIXQ@1236|Gammaproteobacteria	1236|Gammaproteobacteria	-	-	-	-	-	-	-	-	-	-	-	-	-	-	-
PALA52_03570	287.DR97_551	2.09e-122	349.0	COG1670@1|root,COG1670@2|Bacteria,1RKKE@1224|Proteobacteria,1S47R@1236|Gammaproteobacteria,1YGH7@136841|Pseudomonas aeruginosa group	1236|Gammaproteobacteria	J	Acetyltransferase (GNAT) domain	-	-	-	ko:K03817	-	-	-	-	ko00000,ko01000,ko03009	-	-	-	Acetyltransf_3
PALA52_03571	287.DR97_552	1.24e-50	162.0	2DENV@1|root,2ZNMS@2|Bacteria,1QTV3@1224|Proteobacteria,1TB8J@1236|Gammaproteobacteria,1YH3U@136841|Pseudomonas aeruginosa group	1236|Gammaproteobacteria	-	-	-	-	-	-	-	-	-	-	-	-	-	-	-
PALA52_03610	287.DR97_591	2.63e-142	401.0	COG3916@1|root,COG3916@2|Bacteria,1RB3V@1224|Proteobacteria,1S404@1236|Gammaproteobacteria	1236|Gammaproteobacteria	H	Acyl-homoserine-lactone synthase	vanI	-	2.3.1.184	ko:K13060,ko:K13061	ko00270,ko01100,ko02020,ko02024,ko02025,map00270,map01100,map02020,map02024,map02025	-	R08939,R08940	RC00021,RC00039	ko00000,ko00001,ko01000	-	-	-	Autoind_synth
PALA52_03612	287.DR97_592	7.74e-172	479.0	COG2771@1|root,COG2771@2|Bacteria,1N6UR@1224|Proteobacteria,1S4QC@1236|Gammaproteobacteria	1236|Gammaproteobacteria	K	Autoinducer binding domain	lasR	-	-	ko:K15852,ko:K18304,ko:K19734	ko02024,ko02025,map02024,map02025	M00644,M00769	-	-	ko00000,ko00001,ko00002,ko01504,ko03000	-	-	-	Autoind_bind,GerE
PALA52_03615	658612.MD26_16950	1.26e-210	596.0	COG3637@1|root,COG3637@2|Bacteria,1QUUK@1224|Proteobacteria,1T2VK@1236|Gammaproteobacteria	1236|Gammaproteobacteria	M	Alginate export	-	-	-	-	-	-	-	-	-	-	-	-	Alginate_exp
PALA52_03616	575589.HMPREF0018_00670	9.5e-290	805.0	COG3119@1|root,COG3119@2|Bacteria,1MV92@1224|Proteobacteria,1RPDE@1236|Gammaproteobacteria,3NJ0S@468|Moraxellaceae	1236|Gammaproteobacteria	P	Sulfatase	atsA	-	3.1.6.1	ko:K01130	ko00140,ko00600,map00140,map00600	-	R03980,R04856	RC00128,RC00231	ko00000,ko00001,ko01000	-	-	-	Sulfatase,Sulfatase_C
PALA52_03617	220664.PFL_2837	2.06e-227	662.0	COG0457@1|root,COG0457@2|Bacteria,1MX2U@1224|Proteobacteria,1RPD2@1236|Gammaproteobacteria,1YT4Y@136843|Pseudomonas fluorescens group	1236|Gammaproteobacteria	C	Doubled CXXCH motif (Paired_CXXCH_1)	-	-	-	-	-	-	-	-	-	-	-	-	Cytochrom_C552,Cytochrome_C554,HEAT_2,Paired_CXXCH_1,TPR_11,TPR_16,TPR_19,TPR_8
PALA52_03618	1301098.PKB_3290	9.01e-52	166.0	COG2146@1|root,COG2146@2|Bacteria	2|Bacteria	P	nitrite reductase [NAD(P)H] activity	-	-	2.7.1.3	ko:K00846,ko:K05710	ko00051,ko00360,ko01100,ko01120,ko01220,map00051,map00360,map01100,map01120,map01220	M00545	R00866,R03819,R06782,R06783	RC00002,RC00017,RC00098,RC00608	br01602,ko00000,ko00001,ko00002,ko01000,ko04147	-	-	-	Rieske
PALA52_03619	1301098.PKB_3291	3e-51	163.0	COG2350@1|root,COG2350@2|Bacteria	2|Bacteria	S	YCII-related domain	-	-	-	ko:K09780	-	-	-	-	ko00000	-	-	-	YCII
PALA52_03620	1301098.PKB_3292	4.91e-151	431.0	COG3485@1|root,COG3485@2|Bacteria,1MX7W@1224|Proteobacteria,1RP3H@1236|Gammaproteobacteria	1236|Gammaproteobacteria	Q	catechol 1,2-dioxygenase	-	-	1.13.11.1	ko:K03381,ko:K15253	ko00361,ko00362,ko00364,ko00623,ko01100,ko01120,ko01220,map00361,map00362,map00364,map00623,map01100,map01120,map01220	M00568	R00817,R04258,R05299,R05407,R05409,R06833,R06839,R08114,R08115,R09134	RC00388,RC00535,RC01366	ko00000,ko00001,ko00002,ko01000	-	-	-	Dioxygenase_C,Dioxygenase_N
PALA52_03621	1301098.PKB_3293	2.77e-207	578.0	COG1454@1|root,COG1454@2|Bacteria,1MVPH@1224|Proteobacteria,1S1K5@1236|Gammaproteobacteria	1236|Gammaproteobacteria	C	alcohol dehydrogenase	tftE	GO:0003674,GO:0003824,GO:0008150,GO:0008152,GO:0016491,GO:0016627,GO:0016628,GO:0018506,GO:0055114	1.3.1.32	ko:K00217	ko00361,ko00362,ko00364,ko00623,ko01100,ko01120,ko01220,map00361,map00362,map00364,map00623,map01100,map01120,map01220	-	R02988,R02989,R05355,R06848,R07781,R09137,R09138,R09223,R09224	RC00107,RC01335,RC01689,RC02442	ko00000,ko00001,ko01000	-	-	-	Fe-ADH
PALA52_03622	1301098.PKB_3294	0.0	871.0	COG1012@1|root,COG1012@2|Bacteria,1MU1V@1224|Proteobacteria,1RMBQ@1236|Gammaproteobacteria	1236|Gammaproteobacteria	C	belongs to the aldehyde dehydrogenase family	-	-	1.2.1.3,1.2.1.8	ko:K00128,ko:K00130	ko00010,ko00053,ko00071,ko00260,ko00280,ko00310,ko00330,ko00340,ko00380,ko00410,ko00561,ko00620,ko00625,ko00903,ko00981,ko01100,ko01110,ko01120,ko01130,map00010,map00053,map00071,map00260,map00280,map00310,map00330,map00340,map00380,map00410,map00561,map00620,map00625,map00903,map00981,map01100,map01110,map01120,map01130	M00135,M00555	R00264,R00631,R00710,R00904,R01752,R01986,R02549,R02565,R02566,R02678,R02940,R02957,R03283,R03869,R04065,R04506,R04903,R05050,R05237,R05238,R05286,R06366,R08146	RC00047,RC00071,RC00080,RC00186,RC00218,RC00242,RC00816,RC01500	ko00000,ko00001,ko00002,ko01000	-	-	-	Aldedh
PALA52_03623	1301098.PKB_3295	5.49e-238	655.0	28IZD@1|root,2Z8WU@2|Bacteria,1NEGQ@1224|Proteobacteria	1224|Proteobacteria	-	-	-	-	-	-	-	-	-	-	-	-	-	-	-
PALA52_03624	1301098.PKB_3296	1.35e-96	283.0	28PSM@1|root,2ZCE4@2|Bacteria,1RBR6@1224|Proteobacteria	1224|Proteobacteria	-	-	-	-	-	-	-	-	-	-	-	-	-	-	-
PALA52_03625	1301098.PKB_3297	2.04e-202	562.0	COG0583@1|root,COG0583@2|Bacteria,1MW16@1224|Proteobacteria	1224|Proteobacteria	K	Transcriptional regulator	MA20_14610	-	-	-	-	-	-	-	-	-	-	-	HTH_1,LysR_substrate
PALA52_03646	287.DR97_617	7.08e-164	461.0	COG1708@1|root,COG1708@2|Bacteria,1RID1@1224|Proteobacteria,1S9KW@1236|Gammaproteobacteria	1236|Gammaproteobacteria	S	nucleotidyltransferase activity	-	-	-	ko:K07076	-	-	-	-	ko00000	-	-	-	NTP_transf_2
PALA52_03647	395019.Bmul_4981	6.1e-105	312.0	COG0725@1|root,COG0725@2|Bacteria,1PA2T@1224|Proteobacteria,2VKSF@28216|Betaproteobacteria,1K1J0@119060|Burkholderiaceae	28216|Betaproteobacteria	P	PFAM extracellular solute-binding protein family 1	-	-	5.3.3.7	ko:K22003	ko00660,map00660	-	R02244	RC00668	ko00000,ko00001,ko01000	-	-	-	SBP_bac_11
PALA52_03660	287.DR97_630	1.11e-127	364.0	COG0529@1|root,COG0529@2|Bacteria,1MX0D@1224|Proteobacteria,1RNWT@1236|Gammaproteobacteria,1YHNQ@136841|Pseudomonas aeruginosa group	1236|Gammaproteobacteria	P	Catalyzes the synthesis of activated sulfate	cysC	-	2.7.1.25,2.7.7.4	ko:K00860,ko:K00955	ko00230,ko00261,ko00450,ko00920,ko01100,ko01120,ko01130,map00230,map00261,map00450,map00920,map01100,map01120,map01130	M00176	R00509,R00529,R04928,R04929	RC00002,RC00078,RC02809,RC02889	ko00000,ko00001,ko00002,ko01000	-	-	-	APS_kinase,GTP_EFTU
PALA52_03661	287.DR97_631	1.49e-260	717.0	COG3551@1|root,COG3551@2|Bacteria,1PDQB@1224|Proteobacteria,1RXFR@1236|Gammaproteobacteria,1YJZS@136841|Pseudomonas aeruginosa group	1236|Gammaproteobacteria	S	Protein conserved in bacteria	-	-	-	ko:K20444	-	-	-	-	ko00000,ko01000,ko01005,ko02000	4.D.1.3	GT2,GT4	-	-
PALA52_03662	287.DR97_632	1.65e-280	769.0	COG0438@1|root,COG0438@2|Bacteria,1R564@1224|Proteobacteria,1RZBT@1236|Gammaproteobacteria	1236|Gammaproteobacteria	M	PFAM Glycosyl transferase, group 1	-	-	-	-	-	-	-	-	-	-	-	-	Glyco_trans_1_4,Glyco_transf_4,Glycos_transf_1
PALA52_03664	287.DR97_634	0.0	934.0	COG0438@1|root,COG0438@2|Bacteria,1RCC7@1224|Proteobacteria,1S51S@1236|Gammaproteobacteria	1236|Gammaproteobacteria	M	PFAM Glycosyl transferase, group 1	-	-	-	-	-	-	-	-	-	-	-	-	Glyco_trans_1_4,Glyco_trans_4_4,Glyco_transf_4,Glycos_transf_1
PALA52_03665	287.DR97_635	2.05e-173	483.0	COG0463@1|root,COG0463@2|Bacteria,1N4WK@1224|Proteobacteria,1SRHM@1236|Gammaproteobacteria,1YJFT@136841|Pseudomonas aeruginosa group	1236|Gammaproteobacteria	M	Glycosyl transferase family 2	-	-	-	-	-	-	-	-	-	-	-	-	Glycos_transf_2
PALA52_03666	287.DR97_636	4.9e-287	785.0	2ARRS@1|root,31H31@2|Bacteria,1QES0@1224|Proteobacteria,1TBM6@1236|Gammaproteobacteria,1YI1H@136841|Pseudomonas aeruginosa group	1236|Gammaproteobacteria	S	Sulfotransferase family	-	-	-	-	-	-	-	-	-	-	-	-	Sulfotransfer_3
PALA52_03667	287.DR97_637	3.05e-217	601.0	COG1134@1|root,COG1134@2|Bacteria,1MWWC@1224|Proteobacteria,1RN2T@1236|Gammaproteobacteria,1YHWG@136841|Pseudomonas aeruginosa group	1236|Gammaproteobacteria	GM	Wzt C-terminal domain	-	-	-	ko:K09691	ko02010,map02010	M00250	-	-	ko00000,ko00001,ko00002,ko02000	3.A.1.103	-	-	ABC_tran,Wzt_C
PALA52_03668	287.DR97_638	8.37e-253	696.0	COG0438@1|root,COG0438@2|Bacteria,1N0DG@1224|Proteobacteria,1S0D6@1236|Gammaproteobacteria,1YIXT@136841|Pseudomonas aeruginosa group	1236|Gammaproteobacteria	M	Glycosyl transferases group 1	-	-	-	ko:K13004,ko:K21011	ko02025,map02025	-	-	-	ko00000,ko00001,ko01000,ko01003,ko01005	-	GT4	-	Glyco_trans_4_2,Glycos_transf_1
PALA52_03669	287.DR97_639	8.71e-234	644.0	COG1087@1|root,COG1087@2|Bacteria,1MUHI@1224|Proteobacteria,1RMTU@1236|Gammaproteobacteria,1YDX3@136841|Pseudomonas aeruginosa group	1236|Gammaproteobacteria	M	GDP-mannose 4,6 dehydratase	galE	-	5.1.3.2	ko:K01784	ko00052,ko00520,ko01100,map00052,map00520,map01100	M00361,M00362,M00632	R00291,R02984	RC00289	ko00000,ko00001,ko00002,ko01000	-	-	-	Epimerase,GDP_Man_Dehyd
PALA52_03670	287.DR97_640	0.0	1154.0	2BES3@1|root,328HP@2|Bacteria,1QERI@1224|Proteobacteria,1TBKC@1236|Gammaproteobacteria,1YHZA@136841|Pseudomonas aeruginosa group	1236|Gammaproteobacteria	-	-	-	-	-	-	-	-	-	-	-	-	-	-	-
PALA52_03671	287.DR97_641	0.0	1194.0	COG1450@1|root,COG1450@2|Bacteria,1MUUA@1224|Proteobacteria,1RXZA@1236|Gammaproteobacteria,1YIY5@136841|Pseudomonas aeruginosa group	1236|Gammaproteobacteria	NU	Bacterial type II and III secretion system protein	-	-	-	ko:K02453	ko03070,ko05111,map03070,map05111	M00331	-	-	ko00000,ko00001,ko00002,ko02044	3.A.15	-	-	Secretin,Secretin_N
PALA52_03673	95619.PM1_0212195	5.13e-170	480.0	COG2207@1|root,COG2207@2|Bacteria,1MUEM@1224|Proteobacteria,1RQQK@1236|Gammaproteobacteria	1236|Gammaproteobacteria	K	transcriptional regulator	-	-	-	-	-	-	-	-	-	-	-	-	AraC_N,HTH_18
PALA52_03674	95619.PM1_0212190	5.33e-166	468.0	COG1028@1|root,COG1028@2|Bacteria,1MUCH@1224|Proteobacteria,1T1J5@1236|Gammaproteobacteria	1236|Gammaproteobacteria	IQ	Belongs to the short-chain dehydrogenases reductases (SDR) family	-	-	-	-	-	-	-	-	-	-	-	-	adh_short
PALA52_03682	1038922.PflQ2_1606	2.02e-23	92.0	2ESYY@1|root,31UJN@2|Bacteria,1QSF8@1224|Proteobacteria,1RVUZ@1236|Gammaproteobacteria,1YUEJ@136843|Pseudomonas fluorescens group	1236|Gammaproteobacteria	-	-	-	-	-	-	-	-	-	-	-	-	-	-	-
PALA52_03683	82996.sch_02650	1.12e-114	335.0	COG2184@1|root,COG2184@2|Bacteria,1RDPS@1224|Proteobacteria,1SH29@1236|Gammaproteobacteria	1236|Gammaproteobacteria	D	Cell filamentation protein	-	-	-	ko:K04095	-	-	-	-	ko00000,ko03036	-	-	-	Fic
PALA52_03685	287.DR97_430	2.79e-190	529.0	COG3712@1|root,COG3712@2|Bacteria,1RFMS@1224|Proteobacteria,1S85Z@1236|Gammaproteobacteria,1YKV9@136841|Pseudomonas aeruginosa group	1236|Gammaproteobacteria	PT	Domain of unknown function (DUF4974)	-	-	-	ko:K07165	-	-	-	-	ko00000	-	-	-	DUF4974,FecR
PALA52_03702	287.DR97_447	1.76e-168	470.0	COG2197@1|root,COG2197@2|Bacteria,1RKXK@1224|Proteobacteria	1224|Proteobacteria	K	to transcriptional regulator, LuxR family	-	-	-	-	-	-	-	-	-	-	-	-	GerE,PAS_4
PALA52_03706	287.DR97_451	1.99e-104	301.0	2DF7Q@1|root,32U4W@2|Bacteria,1N0SY@1224|Proteobacteria,1SAUR@1236|Gammaproteobacteria,1YGHI@136841|Pseudomonas aeruginosa group	1236|Gammaproteobacteria	-	-	-	-	-	-	-	-	-	-	-	-	-	-	-
PALA52_03719	1149133.ppKF707_3462	0.0	947.0	COG1874@1|root,COG3979@1|root,COG1874@2|Bacteria,COG3979@2|Bacteria	2|Bacteria	S	chitin catabolic process	-	-	-	-	-	-	-	-	-	-	-	-	CBM_4_9,GHL6,Glyco_hydro_18,Glyco_hydro_42,Glyco_hydro_42M,fn3
PALA52_03734	287.DR97_478	0.0	899.0	COG0477@1|root,COG0477@2|Bacteria,1MX9T@1224|Proteobacteria,1RY2X@1236|Gammaproteobacteria,1YGHB@136841|Pseudomonas aeruginosa group	1236|Gammaproteobacteria	EGP	Major Facilitator Superfamily	-	-	-	-	-	-	-	-	-	-	-	-	MFS_1
PALA52_03735	287.DR97_479	1.41e-143	405.0	COG1309@1|root,COG1309@2|Bacteria,1R4IA@1224|Proteobacteria,1S547@1236|Gammaproteobacteria	1236|Gammaproteobacteria	K	Bacterial regulatory proteins, tetR family	-	-	-	-	-	-	-	-	-	-	-	-	TetR_N
PALA52_03736	287.DR97_480	2.92e-81	241.0	COG4460@1|root,COG4460@2|Bacteria,1N01C@1224|Proteobacteria,1S6PR@1236|Gammaproteobacteria	1236|Gammaproteobacteria	S	protein conserved in bacteria	-	-	-	-	-	-	-	-	-	-	-	-	DUF4440
PALA52_03737	287.DR97_481	4.34e-299	819.0	COG0477@1|root,COG2814@2|Bacteria,1MUDA@1224|Proteobacteria,1RP1M@1236|Gammaproteobacteria,1YE0Y@136841|Pseudomonas aeruginosa group	1236|Gammaproteobacteria	EGP	Belongs to the major facilitator superfamily	-	-	-	-	-	-	-	-	-	-	-	-	MFS_1
PALA52_03738	287.DR97_482	3.74e-211	584.0	COG0583@1|root,COG0583@2|Bacteria,1QY35@1224|Proteobacteria,1RNAV@1236|Gammaproteobacteria,1YKS5@136841|Pseudomonas aeruginosa group	1236|Gammaproteobacteria	K	LysR substrate binding domain	ptxR	-	-	-	-	-	-	-	-	-	-	-	HTH_1,LysR_substrate
PALA52_03744	287.DR97_488	6.53e-71	216.0	COG0537@1|root,COG0537@2|Bacteria,1NFEF@1224|Proteobacteria,1SEHG@1236|Gammaproteobacteria,1YGCB@136841|Pseudomonas aeruginosa group	1236|Gammaproteobacteria	FG	Scavenger mRNA decapping enzyme C-term binding	hit-1	-	-	-	-	-	-	-	-	-	-	-	HIT
PALA52_03759	287.DR97_644	3.56e-197	546.0	COG4757@1|root,COG4757@2|Bacteria,1Q1V6@1224|Proteobacteria,1RT3H@1236|Gammaproteobacteria,1YDWR@136841|Pseudomonas aeruginosa group	1236|Gammaproteobacteria	S	Alpha/beta hydrolase family	-	-	-	-	-	-	-	-	-	-	-	-	Abhydrolase_6,Hydrolase_4
PALA52_03785	287.DR97_670	1.76e-43	142.0	COG0479@1|root,COG0479@2|Bacteria,1QTVQ@1224|Proteobacteria,1T1IR@1236|Gammaproteobacteria,1YGRS@136841|Pseudomonas aeruginosa group	1236|Gammaproteobacteria	C	2Fe-2S iron-sulfur cluster binding domain	-	-	-	-	-	-	-	-	-	-	-	-	Fer2_4
PALA52_03789	1294143.H681_03750	9.77e-45	148.0	COG0346@1|root,COG0346@2|Bacteria,1N00H@1224|Proteobacteria,1SAEZ@1236|Gammaproteobacteria	1236|Gammaproteobacteria	E	Required for resistance to the phenazine antibiotic	-	-	-	-	-	-	-	-	-	-	-	-	Glyoxalase
PALA52_03790	1294143.H681_03745	5.01e-115	335.0	COG2378@1|root,COG2378@2|Bacteria,1MXS8@1224|Proteobacteria,1RYN3@1236|Gammaproteobacteria	1236|Gammaproteobacteria	K	transcriptional regulator	-	-	-	-	-	-	-	-	-	-	-	-	HTH_11,WYL
PALA52_03791	287.DR97_674	5.93e-157	443.0	COG1396@1|root,COG1396@2|Bacteria,1MUG2@1224|Proteobacteria,1RQP5@1236|Gammaproteobacteria,1YHYU@136841|Pseudomonas aeruginosa group	1236|Gammaproteobacteria	K	Helix-turn-helix domain	-	-	-	-	-	-	-	-	-	-	-	-	HTH_31
PALA52_03808	287.DR97_691	0.0	1107.0	COG4618@1|root,COG4618@2|Bacteria,1NTI5@1224|Proteobacteria,1T1HR@1236|Gammaproteobacteria,1YCYE@136841|Pseudomonas aeruginosa group	1236|Gammaproteobacteria	V	ABC transporter transmembrane region	aprD	-	-	ko:K06148,ko:K12536	ko02010,map02010	M00328	-	-	ko00000,ko00001,ko00002,ko02000,ko02044	3.A.1,3.A.1.110	-	-	ABC_membrane,ABC_tran
PALA52_03812	301.JNHE01000002_gene2250	3.92e-94	278.0	COG1309@1|root,COG1309@2|Bacteria,1RDIP@1224|Proteobacteria,1SDKT@1236|Gammaproteobacteria	1236|Gammaproteobacteria	K	Bacterial regulatory proteins, tetR family	-	-	-	-	-	-	-	-	-	-	-	-	TetR_C_13,TetR_N
PALA52_03813	301.JNHE01000002_gene2251	1.1e-152	433.0	COG1024@1|root,COG1024@2|Bacteria,1R3Q4@1224|Proteobacteria,1RQ45@1236|Gammaproteobacteria,1YFRZ@136841|Pseudomonas aeruginosa group	1236|Gammaproteobacteria	I	Enoyl-CoA hydratase/isomerase	-	-	-	-	-	-	-	-	-	-	-	-	ECH_1
PALA52_03814	301.JNHE01000002_gene2253	4.86e-145	416.0	COG4757@1|root,COG4757@2|Bacteria,1Q1V6@1224|Proteobacteria,1RT3H@1236|Gammaproteobacteria,1YDWR@136841|Pseudomonas aeruginosa group	1236|Gammaproteobacteria	S	Alpha/beta hydrolase family	-	-	-	-	-	-	-	-	-	-	-	-	Abhydrolase_6,Hydrolase_4
PALA52_03827	287.DR97_707	3.55e-201	558.0	COG3173@1|root,COG3173@2|Bacteria	2|Bacteria	S	very-long-chain-acyl-CoA dehydrogenase activity	-	-	-	-	-	-	-	-	-	-	-	-	APH
PALA52_03830	287.DR97_710	6.95e-194	536.0	COG2249@1|root,COG2249@2|Bacteria,1MUHN@1224|Proteobacteria,1RU3S@1236|Gammaproteobacteria,1YFSH@136841|Pseudomonas aeruginosa group	1236|Gammaproteobacteria	S	NADPH-dependent FMN reductase	nqo2	-	1.6.5.2	ko:K00355	ko00130,ko01110,ko05200,ko05225,ko05418,map00130,map01110,map05200,map05225,map05418	-	R02964,R03643,R03816	RC00819	ko00000,ko00001,ko01000	-	-	-	Flavodoxin_2
PALA52_03831	287.DR97_711	3.58e-206	571.0	COG0583@1|root,COG0583@2|Bacteria,1N663@1224|Proteobacteria,1RMFD@1236|Gammaproteobacteria,1YE3I@136841|Pseudomonas aeruginosa group	1236|Gammaproteobacteria	K	LysR substrate binding domain	syrM1	-	-	-	-	-	-	-	-	-	-	-	HTH_1,LysR_substrate
PALA52_03848	287.DR97_739	4.49e-183	509.0	COG1834@1|root,COG1834@2|Bacteria,1MZ9U@1224|Proteobacteria,1RN0M@1236|Gammaproteobacteria,1YKKY@136841|Pseudomonas aeruginosa group	1236|Gammaproteobacteria	E	Amidinotransferase	-	-	3.5.3.18	ko:K01482	-	-	-	-	ko00000,ko01000,ko04147	-	-	-	Amidinotransf
PALA52_03851	287.DR97_742	8.79e-200	553.0	COG0037@1|root,COG0037@2|Bacteria,1MW5Q@1224|Proteobacteria,1RN2H@1236|Gammaproteobacteria,1YEX3@136841|Pseudomonas aeruginosa group	1236|Gammaproteobacteria	J	Catalyzes the ATP-dependent 2-thiolation of cytidine in position 32 of tRNA, to form 2-thiocytidine (s(2)C32). The sulfur atoms are provided by the cysteine cysteine desulfurase (IscS) system	ttcA	GO:0003674,GO:0003824,GO:0005488,GO:0005575,GO:0005622,GO:0005623,GO:0005737,GO:0005829,GO:0006139,GO:0006396,GO:0006399,GO:0006400,GO:0006725,GO:0006807,GO:0008033,GO:0008150,GO:0008152,GO:0009451,GO:0009987,GO:0010467,GO:0016070,GO:0016740,GO:0016782,GO:0016783,GO:0034227,GO:0034470,GO:0034641,GO:0034660,GO:0043170,GO:0043412,GO:0044237,GO:0044238,GO:0044424,GO:0044444,GO:0044464,GO:0046483,GO:…	-	ko:K14058	-	-	-	-	ko00000,ko03016	-	-	-	ATP_bind_3
PALA52_03889	287.DR97_780	1.02e-134	380.0	COG1943@1|root,COG1943@2|Bacteria,1RCWW@1224|Proteobacteria,1S3ZJ@1236|Gammaproteobacteria,1YGAN@136841|Pseudomonas aeruginosa group	1236|Gammaproteobacteria	L	Transposase IS200 like	-	-	-	ko:K07491	-	-	-	-	ko00000	-	-	-	Y1_Tnp
PALA52_03890	1149133.ppKF707_0636	5.67e-25	100.0	COG3617@1|root,COG3617@2|Bacteria,1QF3B@1224|Proteobacteria,1TC5S@1236|Gammaproteobacteria,1YJWZ@136841|Pseudomonas aeruginosa group	1236|Gammaproteobacteria	K	BRO family, N-terminal domain	-	-	-	-	-	-	-	-	-	-	-	-	Bro-N
PALA52_03891	287.DR97_784	5.15e-58	215.0	COG4104@1|root,COG4104@2|Bacteria,1PDQ0@1224|Proteobacteria,1RWKS@1236|Gammaproteobacteria,1YJWQ@136841|Pseudomonas aeruginosa group	1236|Gammaproteobacteria	S	S-type Pyocin	-	-	-	-	-	-	-	-	-	-	-	-	Pyocin_S
PALA52_03892	287.DR97_785	2.41e-59	185.0	COG4893@1|root,COG4893@2|Bacteria	2|Bacteria	S	Uncharacterized protein conserved in bacteria (DUF2195)	-	-	-	-	-	-	-	-	-	-	-	-	DUF2195
PALA52_03893	220664.PFL_3629	1.86e-76	241.0	2DBBC@1|root,2Z879@2|Bacteria,1PTYE@1224|Proteobacteria,1RQGF@1236|Gammaproteobacteria	1236|Gammaproteobacteria	-	-	-	-	-	-	-	-	-	-	-	-	-	-	-
PALA52_03901	1388763.O165_002675	2.67e-85	259.0	COG0110@1|root,COG0110@2|Bacteria,1PHV0@1224|Proteobacteria,1RUT3@1236|Gammaproteobacteria,1YZFX@136845|Pseudomonas putida group	1236|Gammaproteobacteria	S	Bacterial transferase hexapeptide (six repeats)	-	-	-	-	-	-	-	-	-	-	-	-	Hexapep
PALA52_03912	287.DR97_805	2.07e-72	218.0	COG0346@1|root,COG0346@2|Bacteria,1RH6K@1224|Proteobacteria,1S68V@1236|Gammaproteobacteria	1236|Gammaproteobacteria	E	Glutathione transferase	fosA	-	2.5.1.18	ko:K21253,ko:K21264,ko:K21265	-	-	-	-	ko00000,ko01000,ko01504	-	-	-	Glyoxalase
PALA52_03923	287.DR97_816	1.74e-125	357.0	28QBW@1|root,2ZCUF@2|Bacteria,1RAC7@1224|Proteobacteria,1S2HY@1236|Gammaproteobacteria,1YGAW@136841|Pseudomonas aeruginosa group	1236|Gammaproteobacteria	-	-	-	-	-	-	-	-	-	-	-	-	-	-	-
PALA52_03928	1294143.H681_09230	0.0	906.0	COG1132@1|root,COG1132@2|Bacteria,1MUBM@1224|Proteobacteria,1RMUR@1236|Gammaproteobacteria	1236|Gammaproteobacteria	V	Involved in lipid A export and possibly also in glycerophospholipid export and for biogenesis of the outer membrane. Transmembrane domains (TMD) form a pore in the inner membrane and the ATP-binding domain (NBD) is responsible for energy generation	draA	-	-	ko:K06147,ko:K11085	ko02010,map02010	-	-	-	ko00000,ko00001,ko01000,ko02000	3.A.1.106,3.A.1.109,3.A.1.21	-	-	ABC_membrane,ABC_tran
PALA52_03935	287.DR97_829	9.03e-258	709.0	COG0477@1|root,COG0477@2|Bacteria,1NTHG@1224|Proteobacteria	1224|Proteobacteria	EGP	Sugar (and other) transporter	-	-	-	-	-	-	-	-	-	-	-	-	MFS_1
PALA52_03943	287.DR97_837	4.31e-65	199.0	COG1677@1|root,COG1677@2|Bacteria,1N6RZ@1224|Proteobacteria,1SD52@1236|Gammaproteobacteria,1YGGK@136841|Pseudomonas aeruginosa group	1236|Gammaproteobacteria	N	Flagellar hook-basal body complex protein FliE	fliE	-	-	ko:K02408	ko02040,map02040	-	-	-	ko00000,ko00001,ko02035	-	-	-	FliE
PALA52_03947	1226994.AMZB01000123_gene2821	2.02e-33	118.0	2DWYM@1|root,342JD@2|Bacteria,1QEEB@1224|Proteobacteria,1TB2J@1236|Gammaproteobacteria,1YGWF@136841|Pseudomonas aeruginosa group	1236|Gammaproteobacteria	S	Flagellar protein FliT	-	-	-	-	-	-	-	-	-	-	-	-	FliT
PALA52_03948	1226994.AMZB01000123_gene2820	2.52e-56	178.0	COG1516@1|root,COG1516@2|Bacteria,1MZ3G@1224|Proteobacteria,1S8TQ@1236|Gammaproteobacteria,1YGJ8@136841|Pseudomonas aeruginosa group	1236|Gammaproteobacteria	N	flagellar protein FliS	fliS	-	-	ko:K02422	ko02040,map02040	-	-	-	ko00000,ko00001,ko02035	-	-	-	FliS
PALA52_03949	1226994.AMZB01000123_gene2819	9.67e-164	478.0	COG1345@1|root,COG1345@2|Bacteria,1MUVP@1224|Proteobacteria,1RS2S@1236|Gammaproteobacteria,1YE11@136841|Pseudomonas aeruginosa group	1236|Gammaproteobacteria	N	morphogenesis and for the elongation of the flagellar filament by facilitating polymerization of the flagellin monomers at the tip of growing filament. Forms a capping structure, which prevents flagellin subunits (transported through the central channel of the flagellum) from leaking out without polymerization at the distal end	fliD	GO:0005575,GO:0005576,GO:0005623,GO:0009288,GO:0042995,GO:0043226,GO:0043228,GO:0044464	-	ko:K02407	ko02040,map02040	-	-	-	ko00000,ko00001,ko02035	-	-	-	Flagellin_IN,FliD_C,FliD_N
PALA52_03950	1226994.AMZB01000123_gene2818	2.03e-36	127.0	COG1334@1|root,COG1334@2|Bacteria,1NH9T@1224|Proteobacteria,1SH7I@1236|Gammaproteobacteria,1YH2R@136841|Pseudomonas aeruginosa group	1236|Gammaproteobacteria	N	FlaG protein	flaG	-	-	ko:K06603	-	-	-	-	ko00000,ko02035	-	-	-	FlaG
PALA52_03951	1226994.AMZB01000123_gene2817	4.8e-229	644.0	COG1344@1|root,COG1344@2|Bacteria,1MV1N@1224|Proteobacteria,1RN0Y@1236|Gammaproteobacteria,1YE19@136841|Pseudomonas aeruginosa group	1236|Gammaproteobacteria	N	Flagellin is the subunit protein which polymerizes to form the filaments of bacterial flagella	fliC	GO:0005575,GO:0005576,GO:0005623,GO:0009288,GO:0042995,GO:0043226,GO:0043228,GO:0044464	-	ko:K02406	ko02020,ko02040,ko04621,ko04626,ko05132,ko05134,map02020,map02040,map04621,map04626,map05132,map05134	-	-	-	ko00000,ko00001,ko02035	-	-	-	Flagellin_C,Flagellin_IN,Flagellin_N
PALA52_03952	1390370.O203_15570	0.0	1378.0	COG1216@1|root,COG1887@1|root,COG1216@2|Bacteria,COG1887@2|Bacteria,1MX5Z@1224|Proteobacteria,1RMDY@1236|Gammaproteobacteria,1YERI@136841|Pseudomonas aeruginosa group	1236|Gammaproteobacteria	M	Glycosyl transferase family 2	-	-	-	ko:K20444	-	-	-	-	ko00000,ko01000,ko01005,ko02000	4.D.1.3	GT2,GT4	-	Glycos_transf_2,Glyphos_transf,Methyltransf_23,Methyltransf_31
PALA52_03953	399739.Pmen_2837	2.32e-90	271.0	COG1213@1|root,COG1213@2|Bacteria,1RIU3@1224|Proteobacteria,1S7SA@1236|Gammaproteobacteria	1236|Gammaproteobacteria	M	MobA-like NTP transferase domain	-	-	-	-	-	-	-	-	-	-	-	-	Hydrolase,NTP_transf_3
PALA52_03954	1390370.O203_15580	2.7e-112	325.0	COG0560@1|root,COG0560@2|Bacteria	2|Bacteria	E	Phosphoserine phosphatase	serB	-	3.1.3.3	ko:K01079	ko00260,ko00680,ko01100,ko01120,ko01130,ko01200,ko01230,map00260,map00680,map01100,map01120,map01130,map01200,map01230	M00020	R00582	RC00017	ko00000,ko00001,ko00002,ko01000,ko01009	-	-	-	HAD
PALA52_03955	399739.Pmen_2839	4.34e-83	254.0	COG0500@1|root,COG0500@2|Bacteria,1MYX0@1224|Proteobacteria,1S613@1236|Gammaproteobacteria	1236|Gammaproteobacteria	Q	O-methyltransferase	-	-	-	-	-	-	-	-	-	-	-	-	Methyltransf_31
PALA52_03956	1226994.AMZB01000123_gene2814	2.34e-202	572.0	COG1344@1|root,COG1344@2|Bacteria,1PJUJ@1224|Proteobacteria,1RPNR@1236|Gammaproteobacteria,1YCS1@136841|Pseudomonas aeruginosa group	1236|Gammaproteobacteria	N	Bacterial flagellin N-terminal helical region	flgL	-	-	ko:K02397	ko02040,map02040	-	-	-	ko00000,ko00001,ko02035	-	-	-	Flagellin_C,Flagellin_N
PALA52_03957	287.DR97_857	0.0	1145.0	COG1256@1|root,COG1256@2|Bacteria,1MV2M@1224|Proteobacteria,1RMEA@1236|Gammaproteobacteria,1YE8F@136841|Pseudomonas aeruginosa group	1236|Gammaproteobacteria	N	Belongs to the flagella basal body rod proteins family	flgK	-	-	ko:K02396	ko02040,map02040	-	-	-	ko00000,ko00001,ko02035	-	-	-	Flg_bb_rod,Flg_bbr_C
PALA52_03981	287.DR97_881	6.62e-111	320.0	COG0454@1|root,COG0454@2|Bacteria,1N4J5@1224|Proteobacteria,1SG7H@1236|Gammaproteobacteria,1YJSS@136841|Pseudomonas aeruginosa group	1236|Gammaproteobacteria	K	Acetyltransferase (GNAT) family	-	-	-	-	-	-	-	-	-	-	-	-	Acetyltransf_1
PALA52_04006	287.DR97_906	7.01e-69	208.0	2CF4K@1|root,332IV@2|Bacteria,1N9BX@1224|Proteobacteria,1SCNS@1236|Gammaproteobacteria	1236|Gammaproteobacteria	-	-	-	-	-	-	-	-	-	-	-	-	-	-	-
PALA52_04008	287.DR97_908	1.95e-91	271.0	COG3152@1|root,COG3152@2|Bacteria,1N85G@1224|Proteobacteria,1SCMI@1236|Gammaproteobacteria,1YFUZ@136841|Pseudomonas aeruginosa group	1236|Gammaproteobacteria	S	Membrane	-	-	-	-	-	-	-	-	-	-	-	-	-
PALA52_04020	1149133.ppKF707_1680	4.48e-13	70.5	2DBJX@1|root,2Z9P4@2|Bacteria,1MYUJ@1224|Proteobacteria,1T1IX@1236|Gammaproteobacteria,1YF7B@136841|Pseudomonas aeruginosa group	1236|Gammaproteobacteria	S	outer membrane porin, OprD family	-	-	-	ko:K18093	ko01501,ko02020,map01501,map02020	M00745	-	-	ko00000,ko00001,ko00002,ko01000,ko01504,ko02000	1.B.25.1.1	-	-	OprD
PALA52_04042	287.DR97_953	0.0	1288.0	COG3188@1|root,COG3188@2|Bacteria,1MUHE@1224|Proteobacteria,1RMPU@1236|Gammaproteobacteria,1YHHW@136841|Pseudomonas aeruginosa group	1236|Gammaproteobacteria	NU	Outer membrane usher protein	-	-	-	ko:K07347	ko05133,map05133	-	-	-	ko00000,ko00001,ko02000,ko02035,ko02044	1.B.11.3	-	-	PapC_C,PapC_N,Usher
PALA52_04043	287.DR97_954	1.19e-108	320.0	COG3121@1|root,COG3121@2|Bacteria,1R5FY@1224|Proteobacteria,1S54E@1236|Gammaproteobacteria,1YIPP@136841|Pseudomonas aeruginosa group	1236|Gammaproteobacteria	M	Pili assembly chaperone PapD, C-terminal domain	-	-	-	-	-	-	-	-	-	-	-	-	PapD_C,PapD_N
PALA52_04044	287.DR97_955	4.14e-94	280.0	COG3539@1|root,COG3539@2|Bacteria,1QDWB@1224|Proteobacteria,1TC0W@1236|Gammaproteobacteria,1YJMW@136841|Pseudomonas aeruginosa group	1236|Gammaproteobacteria	NU	Fimbrial protein	-	-	-	-	-	-	-	-	-	-	-	-	Fimbrial
PALA52_04045	287.DR97_957	4.41e-155	436.0	COG1051@1|root,COG1051@2|Bacteria,1RH0I@1224|Proteobacteria,1S60P@1236|Gammaproteobacteria	1236|Gammaproteobacteria	F	DNA mismatch repair protein MutT	mutT_1	-	3.6.1.55	ko:K03574	-	-	-	-	ko00000,ko01000,ko03400	-	-	-	NUDIX,Nudix_N
PALA52_04046	287.DR97_958	2.67e-126	360.0	2AS55@1|root,31HHZ@2|Bacteria,1QF8M@1224|Proteobacteria,1TCDH@1236|Gammaproteobacteria,1YK7S@136841|Pseudomonas aeruginosa group	1236|Gammaproteobacteria	-	-	-	-	-	-	-	-	-	-	-	-	-	-	-
PALA52_04047	287.DR97_959	4.06e-93	271.0	COG0824@1|root,COG0824@2|Bacteria,1RHZW@1224|Proteobacteria,1S71C@1236|Gammaproteobacteria,1YGPW@136841|Pseudomonas aeruginosa group	1236|Gammaproteobacteria	S	Thioesterase-like superfamily	-	-	-	-	-	-	-	-	-	-	-	-	4HBT
PALA52_04048	1121127.JAFA01000014_gene6546	7.24e-121	364.0	COG3835@1|root,COG3835@2|Bacteria,1PJXH@1224|Proteobacteria,2W89J@28216|Betaproteobacteria,1K3PX@119060|Burkholderiaceae	28216|Betaproteobacteria	KT	PucR C-terminal helix-turn-helix domain	-	-	-	-	-	-	-	-	-	-	-	-	HTH_30
PALA52_04049	1218084.BBJK01000008_gene1214	1.52e-16	75.1	2DR7E@1|root,33AJ8@2|Bacteria,1NIF0@1224|Proteobacteria,2WDK0@28216|Betaproteobacteria,1KAHG@119060|Burkholderiaceae	28216|Betaproteobacteria	S	Uncharacterised protein family	-	-	-	-	-	-	-	-	-	-	-	-	Ytca
PALA52_04050	1215114.BBIU01000004_gene435	3.6e-163	466.0	COG1566@1|root,COG1566@2|Bacteria,1MWG0@1224|Proteobacteria,1RP22@1236|Gammaproteobacteria	1236|Gammaproteobacteria	V	multidrug resistance	mdtN	GO:0003674,GO:0005215,GO:0006810,GO:0006855,GO:0008150,GO:0015238,GO:0015546,GO:0015893,GO:0015906,GO:0022857,GO:0042221,GO:0042493,GO:0042886,GO:0042887,GO:0042891,GO:0042895,GO:0042908,GO:0042910,GO:0045117,GO:0050896,GO:0051179,GO:0051234,GO:0055085,GO:0071702,GO:0071705,GO:0072348,GO:1901474,GO:1901682,GO:1902599	-	ko:K15549	-	-	-	-	ko00000,ko02000	8.A.1.1.3	-	-	Biotin_lipoyl_2,HlyD_3,HlyD_D23
PALA52_04051	1215114.BBIU01000004_gene434	2.19e-196	576.0	COG1289@1|root,COG1289@2|Bacteria,1R0HK@1224|Proteobacteria,1RQSH@1236|Gammaproteobacteria	1236|Gammaproteobacteria	S	Resistance protein	mdtO	GO:0003674,GO:0005215,GO:0005575,GO:0005623,GO:0005886,GO:0006810,GO:0006855,GO:0008150,GO:0015238,GO:0015546,GO:0015893,GO:0015906,GO:0016020,GO:0022857,GO:0042221,GO:0042493,GO:0042886,GO:0042887,GO:0042891,GO:0042895,GO:0042908,GO:0042910,GO:0044464,GO:0045117,GO:0050896,GO:0051179,GO:0051234,GO:0055085,GO:0071702,GO:0071705,GO:0071944,GO:0072348,GO:1901474,GO:1901682,GO:1902599	-	ko:K15547	-	-	-	-	ko00000,ko02000	2.A.85.6.1	-	-	FUSC
PALA52_04073	287.DR97_979	7.32e-245	676.0	2DQNZ@1|root,337UY@2|Bacteria,1NCM5@1224|Proteobacteria,1SE46@1236|Gammaproteobacteria,1YDHU@136841|Pseudomonas aeruginosa group	1236|Gammaproteobacteria	S	outer membrane porin, OprD family	oprD	-	-	ko:K18093	ko01501,ko02020,map01501,map02020	M00745	-	-	ko00000,ko00001,ko00002,ko01000,ko01504,ko02000	1.B.25.1.1	-	-	OprD
PALA52_04080	1001585.MDS_3264	2.17e-11	60.1	2AIP3@1|root,317I3@2|Bacteria,1QEIW@1224|Proteobacteria,1TBA0@1236|Gammaproteobacteria,1YH51@136841|Pseudomonas aeruginosa group	1236|Gammaproteobacteria	-	-	-	-	-	-	-	-	-	-	-	-	-	-	-
PALA52_04091	287.DR97_997	9.84e-45	145.0	COG0695@1|root,COG0695@2|Bacteria,1N8R4@1224|Proteobacteria,1SCD3@1236|Gammaproteobacteria,1YGUM@136841|Pseudomonas aeruginosa group	1236|Gammaproteobacteria	O	Glutaredoxin	-	-	-	-	-	-	-	-	-	-	-	-	Glutaredoxin,Thioredoxin_3
PALA52_04122	287.DR97_1028	1.13e-96	284.0	2CHWQ@1|root,2ZEN1@2|Bacteria,1QE7Z@1224|Proteobacteria,1TARD@1236|Gammaproteobacteria,1YGSC@136841|Pseudomonas aeruginosa group	1236|Gammaproteobacteria	-	-	-	-	-	-	-	-	-	-	-	-	-	-	DUF4124,SmpA_OmlA
PALA52_04163	205922.Pfl01_3792	1.55e-257	724.0	COG2831@1|root,COG2831@2|Bacteria,1R5EE@1224|Proteobacteria,1RS6Z@1236|Gammaproteobacteria	1236|Gammaproteobacteria	U	activation secretion protein	-	-	-	ko:K11017	ko03070,map03070	-	-	-	ko00000,ko00001,ko02042,ko02044	1.B.20	-	-	POTRA_2,POTRA_3,ShlB
PALA52_04164	587753.EY04_21415	0.0	1752.0	COG3210@1|root,COG3210@2|Bacteria,1MX2K@1224|Proteobacteria,1RYHV@1236|Gammaproteobacteria	1236|Gammaproteobacteria	U	COG3210 Large exoproteins involved in heme utilization or adhesion	shlA	-	-	ko:K11016	ko03070,map03070	-	-	-	ko00000,ko00001,ko02042,ko02044	-	-	-	Fil_haemagg,Fil_haemagg_2,Haemagg_act
PALA52_04175	287.DR97_1080	1.52e-28	102.0	COG4317@1|root,COG4317@2|Bacteria,1N7ZU@1224|Proteobacteria,1S9H7@1236|Gammaproteobacteria,1YKBG@136841|Pseudomonas aeruginosa group	1236|Gammaproteobacteria	S	Protein of unknown function (DUF1427)	-	-	-	-	-	-	-	-	-	-	-	-	DUF1427
PALA52_04192	287.DR97_1097	0.0	1134.0	COG2199@1|root,COG3322@1|root,COG5002@1|root,COG2199@2|Bacteria,COG3322@2|Bacteria,COG5002@2|Bacteria,1RGWD@1224|Proteobacteria,1SYBX@1236|Gammaproteobacteria,1YDK3@136841|Pseudomonas aeruginosa group	1236|Gammaproteobacteria	T	CHASE4 domain	-	-	-	-	-	-	-	-	-	-	-	-	CHASE4,GGDEF,HAMP,PAS,PAS_4
PALA52_04214	76869.PputGB1_4740	4.89e-280	768.0	COG0582@1|root,COG0582@2|Bacteria,1MU23@1224|Proteobacteria,1RMJ1@1236|Gammaproteobacteria	1236|Gammaproteobacteria	L	Belongs to the 'phage' integrase family	intA	GO:0000150,GO:0003674,GO:0003824,GO:0005575,GO:0006139,GO:0006259,GO:0006310,GO:0006725,GO:0006807,GO:0008150,GO:0008152,GO:0008907,GO:0008979,GO:0009009,GO:0009987,GO:0015074,GO:0016032,GO:0019012,GO:0019015,GO:0019038,GO:0019042,GO:0019043,GO:0019045,GO:0019046,GO:0032359,GO:0034641,GO:0043170,GO:0044237,GO:0044238,GO:0044260,GO:0044403,GO:0044419,GO:0044423,GO:0046483,GO:0051704,GO:0071704,GO:…	-	-	-	-	-	-	-	-	-	-	Arm-DNA-bind_3,Phage_int_SAM_3,Phage_integrase
PALA52_04217	1115515.EV102420_02_00080	2.95e-146	418.0	2CCFG@1|root,318N7@2|Bacteria,1RI4F@1224|Proteobacteria,1SI6P@1236|Gammaproteobacteria	1236|Gammaproteobacteria	-	-	-	-	-	-	-	-	-	-	-	-	-	-	-
PALA52_04218	1115515.EV102420_02_00090	9.12e-150	432.0	COG1100@1|root,COG1100@2|Bacteria,1R9PM@1224|Proteobacteria,1S0BV@1236|Gammaproteobacteria	1236|Gammaproteobacteria	S	Small GTP-binding protein	-	-	-	-	-	-	-	-	-	-	-	-	-
PALA52_04221	287.DR97_5228	4.9e-201	556.0	COG2801@1|root,COG2801@2|Bacteria,1MVXQ@1224|Proteobacteria,1RPEW@1236|Gammaproteobacteria,1YJPN@136841|Pseudomonas aeruginosa group	1236|Gammaproteobacteria	L	HTH-like domain	-	-	-	ko:K07497	-	-	-	-	ko00000	-	-	-	HTH_21,rve
PALA52_04222	440512.C211_23260	2.22e-311	850.0	COG3547@1|root,COG3547@2|Bacteria,1MUKH@1224|Proteobacteria,1RZTT@1236|Gammaproteobacteria	1236|Gammaproteobacteria	L	to GP 6723233	-	-	-	-	-	-	-	-	-	-	-	-	DEDD_Tnp_IS110,Transposase_20
PALA52_04223	287.DR97_5229	1.56e-51	164.0	COG2963@1|root,COG2963@2|Bacteria,1N04F@1224|Proteobacteria,1S6GJ@1236|Gammaproteobacteria,1YJTK@136841|Pseudomonas aeruginosa group	1236|Gammaproteobacteria	L	Transposase	-	-	-	ko:K07483	-	-	-	-	ko00000	-	-	-	HTH_Tnp_1
PALA52_04224	1439940.BAY1663_01462	6.83e-57	178.0	COG3620@1|root,COG3620@2|Bacteria,1N78J@1224|Proteobacteria,1SB0T@1236|Gammaproteobacteria	1236|Gammaproteobacteria	K	Helix-turn-helix domain	-	-	-	-	-	-	-	-	-	-	-	-	HTH_37
PALA52_04241	287.DR97_1180	1.07e-64	197.0	2DR6E@1|root,33AD4@2|Bacteria,1NHFR@1224|Proteobacteria,1TB7Z@1236|Gammaproteobacteria,1YH2Y@136841|Pseudomonas aeruginosa group	1236|Gammaproteobacteria	S	Protein of unknown function (DUF3325)	-	-	-	-	-	-	-	-	-	-	-	-	DUF3325
PALA52_04261	287.DR97_1199	3.03e-82	249.0	COG0583@1|root,COG0583@2|Bacteria,1R7JT@1224|Proteobacteria,1S5W1@1236|Gammaproteobacteria,1YFN6@136841|Pseudomonas aeruginosa group	1236|Gammaproteobacteria	K	LysR substrate binding domain	-	-	-	ko:K03566	ko02026,map02026	-	-	-	ko00000,ko00001,ko03000	-	-	-	HTH_1,LysR_substrate
PALA52_04282	287.DR97_1220	2.11e-34	122.0	COG3073@1|root,COG3073@2|Bacteria,1N9FN@1224|Proteobacteria,1SCNH@1236|Gammaproteobacteria,1YFXX@136841|Pseudomonas aeruginosa group	1236|Gammaproteobacteria	T	Anti sigma-E protein RseA, N-terminal domain	algS	-	-	ko:K03597	-	-	-	-	ko00000,ko03021	-	-	-	RseA_C,RseA_N
PALA52_04283	287.DR97_1220	9.37e-77	232.0	COG3073@1|root,COG3073@2|Bacteria,1N9FN@1224|Proteobacteria,1SCNH@1236|Gammaproteobacteria,1YFXX@136841|Pseudomonas aeruginosa group	1236|Gammaproteobacteria	T	Anti sigma-E protein RseA, N-terminal domain	algS	-	-	ko:K03597	-	-	-	-	ko00000,ko03021	-	-	-	RseA_C,RseA_N
PALA52_04312	477228.YO5_03057	9.63e-13	62.8	2AQXA@1|root,31G5V@2|Bacteria,1QDY9@1224|Proteobacteria,1TA64@1236|Gammaproteobacteria,1Z4BU@136846|Pseudomonas stutzeri group	1236|Gammaproteobacteria	-	-	-	-	-	-	-	-	-	-	-	-	-	-	-
PALA52_04315	287.DR97_1252	4.07e-43	140.0	2CA5H@1|root,33A7N@2|Bacteria,1NI9X@1224|Proteobacteria,1TB7K@1236|Gammaproteobacteria,1YH2J@136841|Pseudomonas aeruginosa group	1236|Gammaproteobacteria	S	Cysteine-rich CWC	-	-	-	-	-	-	-	-	-	-	-	-	Cys_rich_CWC
PALA52_04330	1357279.N018_19915	1.18e-101	299.0	COG0110@1|root,COG0110@2|Bacteria,1MUCJ@1224|Proteobacteria,1RRWH@1236|Gammaproteobacteria,1Z9N7@136849|Pseudomonas syringae group	1236|Gammaproteobacteria	S	Bacterial transferase hexapeptide (six repeats)	cat	-	-	-	-	-	-	-	-	-	-	-	Hexapep
PALA52_04346	287.DR97_1428	0.0	7341.0	COG2911@1|root,COG3210@1|root,COG2911@2|Bacteria,COG3210@2|Bacteria,1MXIP@1224|Proteobacteria,1RZM6@1236|Gammaproteobacteria	1236|Gammaproteobacteria	U	Filamentous haemagglutinin family outer membrane protein	-	-	-	-	-	-	-	-	-	-	-	-	DUF3739,Haemagg_act
PALA52_04347	287.DR97_1431	9.61e-249	684.0	COG0226@1|root,COG0226@2|Bacteria,1RE1I@1224|Proteobacteria,1SFX9@1236|Gammaproteobacteria	1236|Gammaproteobacteria	P	Part of the ABC transporter complex PstSACB involved in phosphate import	-	-	-	-	-	-	-	-	-	-	-	-	PBP_like_2
PALA52_04351	287.DR97_1435	6.12e-125	357.0	COG3149@1|root,COG3149@2|Bacteria	2|Bacteria	U	Involved in a type II secretion system (T2SS, formerly general secretion pathway, GSP) for the export of proteins	gspM	-	-	ko:K02462	ko03070,ko05111,map03070,map05111	M00331	-	-	ko00000,ko00001,ko00002,ko02044	3.A.15	-	-	T2SSM
PALA52_04352	287.DR97_1436	2.87e-255	704.0	COG3297@1|root,COG3297@2|Bacteria,1MX9I@1224|Proteobacteria	1224|Proteobacteria	U	General secretion pathway	gspL	-	-	ko:K02461	ko03070,ko05111,map03070,map05111	M00331	-	-	ko00000,ko00001,ko00002,ko02044	3.A.15	-	-	GspL_C,T2SSL
PALA52_04353	287.DR97_1437	6.25e-203	565.0	COG3156@1|root,COG3156@2|Bacteria,1RE52@1224|Proteobacteria,1SQYX@1236|Gammaproteobacteria	1236|Gammaproteobacteria	U	Type II secretion system protein K	gspK	-	-	ko:K02460	ko03070,ko05111,map03070,map05111	M00331	-	-	ko00000,ko00001,ko00002,ko02044	3.A.15	-	-	T2SSK
PALA52_04355	287.DR97_1439	9.44e-65	199.0	COG2165@1|root,COG2165@2|Bacteria	2|Bacteria	NU	general secretion pathway protein	gspI	-	-	ko:K02456,ko:K02457,ko:K02458,ko:K02459	ko03070,ko05111,map03070,map05111	M00331	-	-	ko00000,ko00001,ko00002,ko02044	3.A.15	-	-	N_methyl,T2SSI
PALA52_04356	1439940.BAY1663_00163	2.67e-22	93.2	2DP58@1|root,32UKC@2|Bacteria,1NEDX@1224|Proteobacteria	1224|Proteobacteria	S	General secretion pathway protein	gspC	-	-	ko:K02452	ko03070,ko05111,map03070,map05111	M00331	-	-	ko00000,ko00001,ko00002,ko02044	3.A.15	-	-	T2SSC
PALA52_04358	287.DR97_1442	2.43e-128	367.0	COG4795@1|root,COG4795@2|Bacteria,1NIRI@1224|Proteobacteria,1SQ28@1236|Gammaproteobacteria	1236|Gammaproteobacteria	U	general secretion pathway protein	hxcW	-	-	ko:K02459	ko03070,ko05111,map03070,map05111	M00331	-	-	ko00000,ko00001,ko00002,ko02044	3.A.15	-	-	N_methyl,T2SSJ
PALA52_04359	287.DR97_1443	9.48e-213	589.0	COG3712@1|root,COG3712@2|Bacteria,1REVT@1224|Proteobacteria,1SNUH@1236|Gammaproteobacteria	1236|Gammaproteobacteria	PT	Domain of unknown function (DUF4880)	vreR	-	-	-	-	-	-	-	-	-	-	-	DUF4880,DUF4974,FecR
PALA52_04360	287.DR97_1444	1.09e-122	350.0	COG1595@1|root,COG1595@2|Bacteria,1RI9I@1224|Proteobacteria,1SQKA@1236|Gammaproteobacteria	1236|Gammaproteobacteria	K	Belongs to the sigma-70 factor family. ECF subfamily	vreI	-	-	ko:K03088	-	-	-	-	ko00000,ko03021	-	-	-	Sigma70_r2,Sigma70_r4_2
PALA52_04370	287.DR97_1457	0.0	1812.0	COG0419@1|root,COG0419@2|Bacteria,1MVTQ@1224|Proteobacteria,1RQFM@1236|Gammaproteobacteria,1YDV3@136841|Pseudomonas aeruginosa group	1236|Gammaproteobacteria	L	Putative exonuclease SbcCD, C subunit	sbcC	GO:0003674,GO:0003824,GO:0004518,GO:0004527,GO:0006139,GO:0006259,GO:0006260,GO:0006310,GO:0006725,GO:0006807,GO:0008150,GO:0008152,GO:0009058,GO:0009059,GO:0009987,GO:0016787,GO:0016788,GO:0034641,GO:0034645,GO:0043170,GO:0044237,GO:0044238,GO:0044249,GO:0044260,GO:0046483,GO:0071704,GO:0090304,GO:0090305,GO:1901360,GO:1901576	-	ko:K03546	-	-	-	-	ko00000,ko03400	-	-	-	AAA_23,SbcCD_C
PALA52_04383	287.DR97_1470	1.17e-100	293.0	COG4960@1|root,COG4960@2|Bacteria,1QF59@1224|Proteobacteria,1TC8C@1236|Gammaproteobacteria,1YK1K@136841|Pseudomonas aeruginosa group	1236|Gammaproteobacteria	OU	Type IV leader peptidase family	-	-	3.4.23.43	ko:K02278	-	-	-	-	ko00000,ko01000,ko02035,ko02044	-	-	-	Peptidase_A24
PALA52_04386	287.DR97_1473	7.48e-50	159.0	2DR0C@1|root,339NA@2|Bacteria,1NGC5@1224|Proteobacteria,1TCG1@1236|Gammaproteobacteria,1YKAR@136841|Pseudomonas aeruginosa group	1236|Gammaproteobacteria	S	Protein of unknown function (DUF3613)	-	-	-	-	-	-	-	-	-	-	-	-	DUF3613
PALA52_04387	287.DR97_1474	1.2e-154	436.0	COG5010@1|root,COG5010@2|Bacteria,1NA2M@1224|Proteobacteria,1SBV8@1236|Gammaproteobacteria	1236|Gammaproteobacteria	U	Flp pilus assembly protein TadD, contains TPR repeats	-	-	-	-	-	-	-	-	-	-	-	-	-
PALA52_04393	287.DR97_1480	4.48e-187	523.0	COG3745@1|root,COG3745@2|Bacteria,1N20K@1224|Proteobacteria,1SAHD@1236|Gammaproteobacteria,1YH6W@136841|Pseudomonas aeruginosa group	1236|Gammaproteobacteria	U	Flp pilus assembly protein RcpC/CpaB	cpaB	-	-	ko:K02279	-	-	-	-	ko00000,ko02035,ko02044	-	-	-	RcpC,SAF
PALA52_04396	287.DR97_1483	0.0	882.0	COG0433@1|root,COG0433@2|Bacteria,1MU59@1224|Proteobacteria,1RPYD@1236|Gammaproteobacteria,1YDYP@136841|Pseudomonas aeruginosa group	1236|Gammaproteobacteria	S	Bacterial protein of unknown function (DUF853)	yjgR	-	-	ko:K06915	-	-	-	-	ko00000	-	-	-	DUF853
PALA52_04397	287.DR97_1484	0.0	1093.0	COG0840@1|root,COG0840@2|Bacteria,1MU9B@1224|Proteobacteria,1RMH0@1236|Gammaproteobacteria,1YE86@136841|Pseudomonas aeruginosa group	1236|Gammaproteobacteria	NT	Cache domain	pctC	-	-	ko:K03406	ko02020,ko02030,map02020,map02030	-	-	-	ko00000,ko00001,ko02035	-	-	-	HAMP,MCPsignal,dCache_1
PALA52_04398	287.DR97_1485	0.0	1091.0	COG0840@1|root,COG0840@2|Bacteria,1MU9B@1224|Proteobacteria,1RMH0@1236|Gammaproteobacteria,1YE86@136841|Pseudomonas aeruginosa group	1236|Gammaproteobacteria	NT	Cache domain	pctC	-	-	ko:K03406	ko02020,ko02030,map02020,map02030	-	-	-	ko00000,ko00001,ko02035	-	-	-	HAMP,MCPsignal,dCache_1
PALA52_04413	287.DR97_1500	5.01e-80	237.0	2DNWD@1|root,32ZI4@2|Bacteria,1NF7C@1224|Proteobacteria,1SFR1@1236|Gammaproteobacteria,1YGDY@136841|Pseudomonas aeruginosa group	1236|Gammaproteobacteria	S	Pilus assembly protein PilZ	-	-	-	-	-	-	-	-	-	-	-	-	PilZ
PALA52_04414	287.DR97_1501	7.99e-71	215.0	2DR2Y@1|root,339YA@2|Bacteria,1NHB7@1224|Proteobacteria,1SH0X@1236|Gammaproteobacteria,1YGHW@136841|Pseudomonas aeruginosa group	1236|Gammaproteobacteria	S	Domain of unknown function (DUF4124)	-	-	-	-	-	-	-	-	-	-	-	-	DUF4124
PALA52_04473	287.DR97_1559	2.31e-69	209.0	COG1993@1|root,COG1993@2|Bacteria,1MZ79@1224|Proteobacteria,1T0G0@1236|Gammaproteobacteria	1236|Gammaproteobacteria	S	Uncharacterized ACR, COG1993	-	-	-	-	-	-	-	-	-	-	-	-	DUF190
PALA52_04594	287.DR97_1682	7.72e-232	639.0	COG0601@1|root,COG0601@2|Bacteria,1MU8Z@1224|Proteobacteria,1RNJ1@1236|Gammaproteobacteria,1YEH1@136841|Pseudomonas aeruginosa group	1236|Gammaproteobacteria	EP	permease	dppB	-	-	ko:K12369,ko:K19227	ko01503,ko02010,map01503,map02010	M00324,M00739	-	-	ko00000,ko00001,ko00002,ko02000	3.A.1.5,3.A.1.5.5	-	-	BPD_transp_1
PALA52_04601	287.DR97_1689	8.64e-153	430.0	COG2049@1|root,COG2049@2|Bacteria,1MWRB@1224|Proteobacteria,1RQIQ@1236|Gammaproteobacteria,1YFA1@136841|Pseudomonas aeruginosa group	1236|Gammaproteobacteria	E	Allophanate hydrolase subunit 1	-	-	-	-	-	-	-	-	-	-	-	-	CT_C_D
PALA52_04604	287.DR97_1692	0.0	1644.0	COG0369@1|root,COG3182@1|root,COG0369@2|Bacteria,COG3182@2|Bacteria,1MWYV@1224|Proteobacteria,1RY05@1236|Gammaproteobacteria,1YFDE@136841|Pseudomonas aeruginosa group	1236|Gammaproteobacteria	P	Flavodoxin	piuB	-	1.8.1.2	ko:K00380	ko00920,ko01100,ko01120,map00920,map01100,map01120	M00176	R00858	RC00065	ko00000,ko00001,ko00002,ko01000	-	-	-	Flavodoxin_1,NAD_binding_1,PepSY_TM
PALA52_04605	1294143.H681_05115	0.0	1330.0	COG4774@1|root,COG4774@2|Bacteria,1MV0X@1224|Proteobacteria,1RN3C@1236|Gammaproteobacteria	1236|Gammaproteobacteria	P	receptor	-	-	-	ko:K16090	-	-	-	-	ko00000,ko02000	1.B.14.1.11	-	-	Plug,TonB_dep_Rec
PALA52_04612	287.DR97_1701	3.13e-139	392.0	COG3023@1|root,COG3023@2|Bacteria,1RDHU@1224|Proteobacteria,1S3PG@1236|Gammaproteobacteria,1YEB7@136841|Pseudomonas aeruginosa group	1236|Gammaproteobacteria	V	Ami_2	ampD	GO:0000270,GO:0003674,GO:0003824,GO:0005575,GO:0005622,GO:0005623,GO:0005737,GO:0006022,GO:0006026,GO:0006027,GO:0006807,GO:0008150,GO:0008152,GO:0008745,GO:0009056,GO:0009057,GO:0009253,GO:0009254,GO:0009392,GO:0016020,GO:0016787,GO:0016810,GO:0016811,GO:0019867,GO:0030203,GO:0043170,GO:0044424,GO:0044464,GO:0061783,GO:0071704,GO:1901135,GO:1901136,GO:1901564,GO:1901565,GO:1901575	3.5.1.28	ko:K01447,ko:K03806	-	-	R04112	RC00064,RC00141	ko00000,ko01000,ko01011	-	-	iAF1260.b0110,iB21_1397.B21_00108,iBWG_1329.BWG_0103,iEC55989_1330.EC55989_0103,iECBD_1354.ECBD_3509,iECB_1328.ECB_00109,iECDH10B_1368.ECDH10B_0090,iECDH1ME8569_1439.ECDH1ME8569_0104,iECD_1391.ECD_00109,iECIAI1_1343.ECIAI1_0107,iECO103_1326.ECO103_0110,iECO111_1330.ECO111_0111,iECO26_1355.ECO26_0112,iECSE_1348.ECSE_0110,iECW_1372.ECW_m0107,iEKO11_1354.EKO11_3806,iETEC_1333.ETEC_0106,iEcDH1_1363.E…	Amidase_2
PALA52_04613	287.DR97_1702	0.0	1402.0	COG4223@1|root,COG4223@2|Bacteria,1N10X@1224|Proteobacteria,1RYCQ@1236|Gammaproteobacteria,1YDHW@136841|Pseudomonas aeruginosa group	1236|Gammaproteobacteria	S	Protein of unknown function (DUF1631)	-	-	-	-	-	-	-	-	-	-	-	-	DUF1631
PALA52_04617	287.DR97_1708	2.15e-241	669.0	COG1459@1|root,COG1459@2|Bacteria,1MV4U@1224|Proteobacteria,1RNV0@1236|Gammaproteobacteria,1YEVX@136841|Pseudomonas aeruginosa group	1236|Gammaproteobacteria	U	Type II secretion system (T2SS), protein F	pilC	GO:0002790,GO:0005575,GO:0005623,GO:0005886,GO:0006810,GO:0008104,GO:0008150,GO:0009297,GO:0009306,GO:0009987,GO:0015031,GO:0015628,GO:0015833,GO:0016020,GO:0016043,GO:0022607,GO:0030030,GO:0030031,GO:0032940,GO:0033036,GO:0042886,GO:0043711,GO:0044085,GO:0044464,GO:0045184,GO:0046903,GO:0051179,GO:0051234,GO:0055085,GO:0071702,GO:0071705,GO:0071806,GO:0071840,GO:0071944,GO:0098776	-	ko:K02653	-	-	-	-	ko00000,ko02035,ko02044	3.A.15.2	-	-	T2SSF
PALA52_04630	287.DR97_1721	0.0	982.0	COG2831@1|root,COG2831@2|Bacteria,1MWEC@1224|Proteobacteria,1RYVX@1236|Gammaproteobacteria,1YHBC@136841|Pseudomonas aeruginosa group	1236|Gammaproteobacteria	U	Haemolysin secretion/activation protein ShlB/FhaC/HecB	hxuB	GO:0005575,GO:0005623,GO:0009279,GO:0016020,GO:0019867,GO:0030312,GO:0030313,GO:0031975,GO:0044462,GO:0044464,GO:0071944	-	-	-	-	-	-	-	-	-	-	POTRA_2,ShlB
PALA52_04631	287.DR97_1722	0.0	976.0	COG3210@1|root,COG3210@2|Bacteria,1MXIP@1224|Proteobacteria,1RSAX@1236|Gammaproteobacteria,1YHVZ@136841|Pseudomonas aeruginosa group	1236|Gammaproteobacteria	U	adhes_NPXG filamentous hemagglutinin family N-terminal domain protein	Z012_01725	GO:0005575,GO:0005576	-	-	-	-	-	-	-	-	-	-	ESPR,Glug,Haemagg_act
PALA52_04640	287.DR97_1850	0.0	990.0	COG0642@1|root,COG2205@2|Bacteria,1MXF8@1224|Proteobacteria,1RMMI@1236|Gammaproteobacteria,1YEEB@136841|Pseudomonas aeruginosa group	1236|Gammaproteobacteria	T	His Kinase A (phosphoacceptor) domain	pilS	-	2.7.13.3	ko:K02668	ko02020,map02020	M00501	-	-	ko00000,ko00001,ko00002,ko01000,ko01001,ko02022,ko02035	-	-	-	HATPase_c,HisKA,PAS_8
PALA52_04643	287.DR97_1853	4.19e-112	322.0	COG4970@1|root,COG4970@2|Bacteria,1Q92W@1224|Proteobacteria,1TB8A@1236|Gammaproteobacteria,1YH3D@136841|Pseudomonas aeruginosa group	1236|Gammaproteobacteria	NU	Type II transport protein GspH	-	-	-	-	-	-	-	-	-	-	-	-	GspH,N_methyl
PALA52_04644	287.DR97_1854	4.54e-111	320.0	COG4970@1|root,COG4970@2|Bacteria,1N43I@1224|Proteobacteria,1SBWS@1236|Gammaproteobacteria,1YH03@136841|Pseudomonas aeruginosa group	1236|Gammaproteobacteria	NU	Type II transport protein GspH	-	-	-	ko:K08084,ko:K08085	-	-	-	-	ko00000,ko02044	3.A.15.2	-	-	GspH,N_methyl
PALA52_04645	287.DR97_1855	5.84e-129	366.0	COG4967@1|root,COG4967@2|Bacteria,1NDDQ@1224|Proteobacteria,1SQXH@1236|Gammaproteobacteria,1YGTZ@136841|Pseudomonas aeruginosa group	1236|Gammaproteobacteria	NU	Pilus assembly protein PilV	pilV	-	-	ko:K02671	-	-	-	-	ko00000,ko02035,ko02044	-	-	-	N_methyl
PALA52_04646	287.DR97_1856	2.6e-192	534.0	COG4966@1|root,COG4966@2|Bacteria,1NYZR@1224|Proteobacteria,1SPZH@1236|Gammaproteobacteria,1YG6K@136841|Pseudomonas aeruginosa group	1236|Gammaproteobacteria	NU	pilus assembly protein PilW	-	-	-	ko:K02672	-	-	-	-	ko00000,ko02035,ko02044	-	-	-	N_methyl,PilW
PALA52_04647	287.DR97_1857	2.01e-134	381.0	COG4726@1|root,COG4726@2|Bacteria,1PT00@1224|Proteobacteria,1SX10@1236|Gammaproteobacteria,1YGZI@136841|Pseudomonas aeruginosa group	1236|Gammaproteobacteria	NU	PilX N-terminal	-	-	-	ko:K02673	-	-	-	-	ko00000,ko02035,ko02044	-	-	-	PilX_N
PALA52_04648	287.DR97_1858	0.0	2210.0	COG3419@1|root,COG3419@2|Bacteria,1NUAV@1224|Proteobacteria,1RPV3@1236|Gammaproteobacteria,1YDKA@136841|Pseudomonas aeruginosa group	1236|Gammaproteobacteria	NU	Neisseria PilC beta-propeller domain	pilY1	-	-	ko:K02674	-	-	-	-	ko00000,ko02035,ko02044	-	-	-	Neisseria_PilC
PALA52_04649	287.DR97_1859	2.73e-73	220.0	2ARJM@1|root,31GW6@2|Bacteria,1QEJ8@1224|Proteobacteria,1TBAJ@1236|Gammaproteobacteria,1YH5Y@136841|Pseudomonas aeruginosa group	1236|Gammaproteobacteria	S	Type 4 fimbrial biogenesis protein PilY2	-	-	-	ko:K02675	-	-	-	-	ko00000,ko02035	-	-	-	Fimbrial_PilY2
PALA52_04650	287.DR97_1860	5.43e-90	264.0	COG4968@1|root,COG4968@2|Bacteria,1N6QE@1224|Proteobacteria,1SCBS@1236|Gammaproteobacteria,1YGNY@136841|Pseudomonas aeruginosa group	1236|Gammaproteobacteria	NU	Type IV minor pilin ComP, DNA uptake sequence receptor	pilE	-	-	ko:K02655	-	-	-	-	ko00000,ko02035,ko02044	3.A.15.2	-	-	ComP_DUS,N_methyl
PALA52_04668	287.DR97_1877	2.59e-53	168.0	2E2CT@1|root,32XHQ@2|Bacteria,1N29V@1224|Proteobacteria,1SC30@1236|Gammaproteobacteria,1YH02@136841|Pseudomonas aeruginosa group	1236|Gammaproteobacteria	S	cation transporter	-	-	-	-	-	-	-	-	-	-	-	-	-
PALA52_04671	287.DR97_1880	0.0	1575.0	COG1067@1|root,COG1067@2|Bacteria,1MWGB@1224|Proteobacteria,1RMPC@1236|Gammaproteobacteria,1YF2V@136841|Pseudomonas aeruginosa group	1236|Gammaproteobacteria	O	AAA domain	IV02_30220	-	-	ko:K04770	-	-	-	-	ko00000,ko01000,ko01002	-	-	-	AAA_32,Lon_C
PALA52_04680	1124983.PFLCHA0_c23700	3.23e-60	210.0	COG1413@1|root,COG1413@2|Bacteria,1MYD9@1224|Proteobacteria,1S622@1236|Gammaproteobacteria,1YRD5@136843|Pseudomonas fluorescens group	1236|Gammaproteobacteria	C	lyase activity	-	-	-	-	-	-	-	-	-	-	-	-	-
PALA52_04691	287.DR97_1902	1.12e-97	286.0	COG1309@1|root,COG1309@2|Bacteria,1RM3U@1224|Proteobacteria,1SEUK@1236|Gammaproteobacteria,1YFV9@136841|Pseudomonas aeruginosa group	1236|Gammaproteobacteria	K	Transcriptional regulator	nfxB	-	-	ko:K18294	-	M00639	-	-	ko00000,ko00002,ko01504,ko03000	-	-	-	HTH_IclR,TetR_N
PALA52_04692	287.DR97_1903	8.68e-317	865.0	COG1538@1|root,COG1538@2|Bacteria,1MUA8@1224|Proteobacteria,1RMDA@1236|Gammaproteobacteria,1YER9@136841|Pseudomonas aeruginosa group	1236|Gammaproteobacteria	MU	Outer membrane efflux protein	cusC	GO:0000041,GO:0003674,GO:0005215,GO:0005375,GO:0005488,GO:0005507,GO:0006464,GO:0006497,GO:0006807,GO:0006810,GO:0006811,GO:0006812,GO:0006825,GO:0006873,GO:0006875,GO:0006878,GO:0006950,GO:0008150,GO:0008152,GO:0008289,GO:0008324,GO:0009058,GO:0009059,GO:0009636,GO:0009987,GO:0010035,GO:0010038,GO:0010272,GO:0010273,GO:0015075,GO:0015318,GO:0016043,GO:0018345,GO:0019538,GO:0019725,GO:0019992,GO:…	-	ko:K07796,ko:K08721,ko:K18139	ko01501,ko02020,ko02024,map01501,map02020,map02024	M00639,M00642,M00643,M00647,M00718,M00768,M00822	-	-	ko00000,ko00001,ko00002,ko01504,ko02000	1.B.17,1.B.17.3.4,1.B.17.3.5,2.A.6.2	-	iAPECO1_1312.APECO1_1476,iECOK1_1307.ECOK1_0581,iECS88_1305.ECS88_0609,iSFxv_1172.SFxv_0521,iS_1188.S0481,iUMN146_1321.UM146_14655,iUTI89_1310.UTI89_C0572	OEP
PALA52_04719	287.DR97_1930	2.03e-33	120.0	2A9DZ@1|root,30YJB@2|Bacteria,1PKFC@1224|Proteobacteria,1TCC9@1236|Gammaproteobacteria,1YK6A@136841|Pseudomonas aeruginosa group	1236|Gammaproteobacteria	-	-	-	-	-	-	-	-	-	-	-	-	-	-	-
PALA52_04721	287.DR97_1932	0.0	3385.0	COG3210@1|root,COG3210@2|Bacteria,1MXIP@1224|Proteobacteria,1RSAX@1236|Gammaproteobacteria,1YHVZ@136841|Pseudomonas aeruginosa group	1236|Gammaproteobacteria	U	adhes_NPXG filamentous hemagglutinin family N-terminal domain protein	-	-	-	-	-	-	-	-	-	-	-	-	Glug,Haemagg_act
PALA52_04735	287.DR97_1946	4.05e-53	167.0	294W4@1|root,2ZS96@2|Bacteria,1P7SK@1224|Proteobacteria,1SURT@1236|Gammaproteobacteria,1YH21@136841|Pseudomonas aeruginosa group	1236|Gammaproteobacteria	-	-	-	-	-	-	-	-	-	-	-	-	-	-	-
PALA52_04769	287.DR97_1980	7.9e-218	602.0	COG0462@1|root,COG0462@2|Bacteria,1MW21@1224|Proteobacteria,1RMUC@1236|Gammaproteobacteria,1YD1Y@136841|Pseudomonas aeruginosa group	1236|Gammaproteobacteria	F	Involved in the biosynthesis of the central metabolite phospho-alpha-D-ribosyl-1-pyrophosphate (PRPP) via the transfer of pyrophosphoryl group from ATP to 1-hydroxyl of ribose-5-phosphate (Rib-5-P)	prs	GO:0000287,GO:0003674,GO:0003824,GO:0004749,GO:0005488,GO:0005575,GO:0005622,GO:0005623,GO:0005737,GO:0005829,GO:0006015,GO:0006139,GO:0006163,GO:0006164,GO:0006725,GO:0006753,GO:0006793,GO:0006796,GO:0006807,GO:0008150,GO:0008152,GO:0009058,GO:0009117,GO:0009150,GO:0009152,GO:0009165,GO:0009259,GO:0009260,GO:0009987,GO:0016740,GO:0016772,GO:0016778,GO:0018130,GO:0019438,GO:0019637,GO:0019693,GO:…	2.7.6.1	ko:K00948	ko00030,ko00230,ko01100,ko01110,ko01120,ko01130,ko01200,ko01230,map00030,map00230,map01100,map01110,map01120,map01130,map01200,map01230	M00005	R01049	RC00002,RC00078	ko00000,ko00001,ko00002,ko01000	-	-	iAF1260.b1207,iAPECO1_1312.APECO1_323,iB21_1397.B21_01192,iBWG_1329.BWG_1032,iE2348C_1286.E2348C_1330,iEC042_1314.EC042_1264,iEC55989_1330.EC55989_1303,iECABU_c1320.ECABU_c14780,iECBD_1354.ECBD_2414,iECB_1328.ECB_01182,iECDH10B_1368.ECDH10B_1260,iECDH1ME8569_1439.ECDH1ME8569_1146,iECD_1391.ECD_01182,iECED1_1282.ECED1_1355,iECH74115_1262.ECH74115_1688,iECIAI1_1343.ECIAI1_1228,iECIAI39_1322.ECIAI39…	Pribosyl_synth,Pribosyltran_N
PALA52_04774	287.DR97_1994	2.87e-246	675.0	COG0582@1|root,COG0582@2|Bacteria,1N45B@1224|Proteobacteria,1RNDM@1236|Gammaproteobacteria,1YFC3@136841|Pseudomonas aeruginosa group	1236|Gammaproteobacteria	L	Phage integrase family	-	-	-	-	-	-	-	-	-	-	-	-	Phage_integrase
PALA52_04775	287.DR97_1389	0.0	872.0	28JT0@1|root,2Z9IB@2|Bacteria,1R5B0@1224|Proteobacteria,1S0EH@1236|Gammaproteobacteria,1YCRR@136841|Pseudomonas aeruginosa group	1236|Gammaproteobacteria	-	-	-	-	-	-	-	-	-	-	-	-	-	-	-
PALA52_04777	287.DR97_1391	4.58e-269	739.0	COG4128@1|root,COG4128@2|Bacteria,1N0I7@1224|Proteobacteria,1SAH8@1236|Gammaproteobacteria,1YHCT@136841|Pseudomonas aeruginosa group	1236|Gammaproteobacteria	S	Zonular occludens toxin (Zot)	zot	GO:0001906,GO:0006810,GO:0006996,GO:0007010,GO:0008150,GO:0009405,GO:0009987,GO:0016043,GO:0031640,GO:0035821,GO:0042044,GO:0042045,GO:0044364,GO:0044419,GO:0051179,GO:0051234,GO:0051704,GO:0070633,GO:0071840	-	ko:K10954	ko05110,map05110	-	-	-	ko00000,ko00001,ko02042	-	-	-	Zot
PALA52_04778	287.DR97_1393	1.35e-78	233.0	2AS6Q@1|root,31HJN@2|Bacteria,1QFAB@1224|Proteobacteria,1TCFW@1236|Gammaproteobacteria,1YKAN@136841|Pseudomonas aeruginosa group	287.DR97_1393|-	S	Protein of unknown function (DUF2523)	-	-	-	-	-	-	-	-	-	-	-	-	-
PALA52_04779	287.DR97_2000	4.95e-126	369.0	28UPQ@1|root,2ZGU4@2|Bacteria	2|Bacteria	-	-	-	-	-	-	-	-	-	-	-	-	-	-	-
PALA52_04781	287.DR97_1396	1.55e-55	172.0	2AIVB@1|root,319CJ@2|Bacteria,1QFBC@1224|Proteobacteria,1TCHQ@1236|Gammaproteobacteria,1YKCD@136841|Pseudomonas aeruginosa group	287.DR97_1396|-	-	-	-	-	-	-	-	-	-	-	-	-	-	-	-
PALA52_04783	287.DR97_1398	4.98e-92	270.0	2AS78@1|root,31HK7@2|Bacteria,1QFAV@1224|Proteobacteria,1TCGY@1236|Gammaproteobacteria,1YKBJ@136841|Pseudomonas aeruginosa group	287.DR97_1398|-	-	-	-	-	-	-	-	-	-	-	-	-	-	-	-
PALA52_04784	287.DR97_2006	4.59e-58	179.0	2B2VZ@1|root,31VGH@2|Bacteria,1QEIA@1224|Proteobacteria,1TB8Y@1236|Gammaproteobacteria,1YH4C@136841|Pseudomonas aeruginosa group	1236|Gammaproteobacteria	-	-	-	-	-	-	-	-	-	-	-	-	-	-	-
PALA52_04785	287.DR97_2007	6.61e-57	176.0	2DCKU@1|root,2ZEJ1@2|Bacteria,1NH7J@1224|Proteobacteria,1T1FY@1236|Gammaproteobacteria,1YH01@136841|Pseudomonas aeruginosa group	1236|Gammaproteobacteria	-	-	-	-	-	-	-	-	-	-	-	-	-	-	-
PALA52_04786	716541.ECL_01086	1.28e-222	627.0	2DBQ2@1|root,2ZABR@2|Bacteria,1R4SC@1224|Proteobacteria,1SF73@1236|Gammaproteobacteria	1236|Gammaproteobacteria	-	-	-	-	-	-	-	-	-	-	-	-	-	-	-
PALA52_04831	287.DR97_2057	1.58e-303	827.0	COG0436@1|root,COG0436@2|Bacteria,1MWS8@1224|Proteobacteria,1RQBM@1236|Gammaproteobacteria,1YE57@136841|Pseudomonas aeruginosa group	1236|Gammaproteobacteria	E	Aminotransferase class I and II	yfdZ	GO:0003674,GO:0003824,GO:0004021,GO:0006082,GO:0006090,GO:0006520,GO:0006522,GO:0006523,GO:0006807,GO:0008150,GO:0008152,GO:0008483,GO:0008652,GO:0009058,GO:0009078,GO:0009079,GO:0009987,GO:0016053,GO:0016740,GO:0016769,GO:0019272,GO:0019752,GO:0030632,GO:0032787,GO:0042851,GO:0042852,GO:0043436,GO:0044237,GO:0044238,GO:0044249,GO:0044281,GO:0044283,GO:0046144,GO:0046145,GO:0046394,GO:0046416,GO:…	-	ko:K14261	-	-	-	-	ko00000,ko01000,ko01007	-	-	iEcSMS35_1347.EcSMS35_2531,iSBO_1134.SBO_2405	Aminotran_1_2
PALA52_04891	287.DR97_2117	2.04e-110	317.0	COG1586@1|root,COG1586@2|Bacteria,1RH88@1224|Proteobacteria,1S7BA@1236|Gammaproteobacteria	1236|Gammaproteobacteria	E	Catalyzes the decarboxylation of S-adenosylmethionine to S-adenosylmethioninamine (dcAdoMet), the propylamine donor required for the synthesis of the polyamines spermine and spermidine from the diamine putrescine	speH	-	2.5.1.128,4.1.1.50	ko:K01611,ko:K07057	ko00270,ko00330,ko01100,map00270,map00330,map01100	M00034,M00133	R00178	RC00299	ko00000,ko00001,ko00002,ko01000	-	-	-	AdoMet_dc
PALA52_04893	287.DR97_2119	1.15e-201	558.0	2EQ9K@1|root,33HVR@2|Bacteria,1NP0U@1224|Proteobacteria	1224|Proteobacteria	-	-	-	-	-	-	-	-	-	-	-	-	-	-	-
PALA52_04894	287.DR97_2120	7.74e-154	432.0	COG0745@1|root,COG0745@2|Bacteria,1N0YI@1224|Proteobacteria,1RQQ3@1236|Gammaproteobacteria,1YEWG@136841|Pseudomonas aeruginosa group	1236|Gammaproteobacteria	T	Transcriptional regulatory protein, C terminal	lrpR	-	-	ko:K07666	ko02020,ko02024,map02020,map02024	M00453	-	-	ko00000,ko00001,ko00002,ko02022	-	-	-	Response_reg,Trans_reg_C
PALA52_04895	287.DR97_2121	0.0	907.0	COG0642@1|root,COG0642@2|Bacteria,1QTSX@1224|Proteobacteria,1T1G3@1236|Gammaproteobacteria,1YKYW@136841|Pseudomonas aeruginosa group	1236|Gammaproteobacteria	T	His Kinase A (phosphoacceptor) domain	qseC	GO:0005575,GO:0005623,GO:0005886,GO:0016020,GO:0044464,GO:0071944	2.7.13.3	ko:K07645	ko02020,ko02024,map02020,map02024	M00453	-	-	ko00000,ko00001,ko00002,ko01000,ko01001,ko02022	-	-	-	2CSK_N,HATPase_c,HisKA
PALA52_04920	287.DR97_2148	3.14e-167	468.0	COG0388@1|root,COG0388@2|Bacteria,1RKC7@1224|Proteobacteria,1S4EA@1236|Gammaproteobacteria	1236|Gammaproteobacteria	H	carbon-nitrogen hydrolase	-	-	6.3.5.1	ko:K01950	ko00760,ko01100,map00760,map01100	M00115	R00257	RC00010,RC00100	ko00000,ko00001,ko00002,ko01000	-	-	-	CN_hydrolase
PALA52_04942	287.DR97_2173	1.28e-159	450.0	2EESS@1|root,338KB@2|Bacteria,1NAER@1224|Proteobacteria	1224|Proteobacteria	-	-	-	-	-	-	-	-	-	-	-	-	-	-	-
PALA52_04969	287.DR97_2200	5.39e-176	494.0	297MD@1|root,2ZUUB@2|Bacteria,1P575@1224|Proteobacteria	1224|Proteobacteria	-	-	-	-	-	-	-	-	-	-	-	-	-	-	-
PALA52_04979	287.DR97_2210	0.0	958.0	COG0559@1|root,COG1413@1|root,COG0559@2|Bacteria,COG1413@2|Bacteria,1MVND@1224|Proteobacteria,1RQXD@1236|Gammaproteobacteria,1YEUM@136841|Pseudomonas aeruginosa group	1236|Gammaproteobacteria	U	Belongs to the binding-protein-dependent transport system permease family	urtB	-	-	ko:K11960	ko02010,map02010	M00323	-	-	ko00000,ko00001,ko00002,ko02000	3.A.1.4.4,3.A.1.4.5	-	-	BPD_transp_2,HEAT_2
PALA52_05117	287.DR97_2354	8.76e-222	619.0	COG3307@1|root,COG3307@2|Bacteria,1N80K@1224|Proteobacteria,1SYC7@1236|Gammaproteobacteria,1YKUZ@136841|Pseudomonas aeruginosa group	1236|Gammaproteobacteria	M	O-Antigen ligase	-	-	-	-	-	-	-	-	-	-	-	-	Wzy_C
PALA52_05158	287.DR97_2396	3.57e-120	343.0	COG3168@1|root,COG3168@2|Bacteria,1RI6V@1224|Proteobacteria,1S6VJ@1236|Gammaproteobacteria,1YE76@136841|Pseudomonas aeruginosa group	1236|Gammaproteobacteria	NU	Pilus assembly protein, PilP	pilP	-	-	ko:K02665	-	-	-	-	ko00000,ko02035,ko02044	-	-	-	PilP
PALA52_05159	287.DR97_2397	1.1e-137	390.0	COG3167@1|root,COG3167@2|Bacteria,1RBGW@1224|Proteobacteria,1S2P6@1236|Gammaproteobacteria,1YKS2@136841|Pseudomonas aeruginosa group	1236|Gammaproteobacteria	NU	Pilus assembly protein, PilO	pilO	-	-	ko:K02664	-	-	-	-	ko00000,ko02035,ko02044	-	-	-	PilO
PALA52_05160	287.DR97_2398	1.64e-128	366.0	COG3166@1|root,COG3166@2|Bacteria,1RF1S@1224|Proteobacteria,1S3S0@1236|Gammaproteobacteria,1YECH@136841|Pseudomonas aeruginosa group	1236|Gammaproteobacteria	NU	Fimbrial assembly protein (PilN)	pilN	-	-	ko:K02663	-	-	-	-	ko00000,ko02035,ko02044	-	-	-	PilN
PALA52_05203	287.DR97_2441	4.34e-105	311.0	COG0790@1|root,COG0790@2|Bacteria,1N512@1224|Proteobacteria,1T0HY@1236|Gammaproteobacteria,1YKEH@136841|Pseudomonas aeruginosa group	1224|Proteobacteria	S	Sel1-like repeats.	-	-	-	-	-	-	-	-	-	-	-	-	Sel1
PALA52_05204	287.DR97_2442	9.05e-147	419.0	COG0790@1|root,COG0790@2|Bacteria,1N512@1224|Proteobacteria,1T0HY@1236|Gammaproteobacteria,1YKEH@136841|Pseudomonas aeruginosa group	1236|Gammaproteobacteria	S	Sel1-like repeats.	-	-	-	-	-	-	-	-	-	-	-	-	Sel1
PALA52_05205	287.DR97_2442	6.45e-142	406.0	COG0790@1|root,COG0790@2|Bacteria,1N512@1224|Proteobacteria,1T0HY@1236|Gammaproteobacteria,1YKEH@136841|Pseudomonas aeruginosa group	1236|Gammaproteobacteria	S	Sel1-like repeats.	-	-	-	-	-	-	-	-	-	-	-	-	Sel1
PALA52_05240	287.DR97_2477	4.75e-126	359.0	2E42P@1|root,32YZ5@2|Bacteria,1N868@1224|Proteobacteria,1SCUM@1236|Gammaproteobacteria,1YFVD@136841|Pseudomonas aeruginosa group	1236|Gammaproteobacteria	S	Domain of unknown function (DUF4124)	-	-	-	-	-	-	-	-	-	-	-	-	BiPBP_C,DUF4124
PALA52_05244	1226994.AMZB01000081_gene226	4.03e-21	89.4	2BCRQ@1|root,326C7@2|Bacteria,1QEEV@1224|Proteobacteria,1TB3M@1236|Gammaproteobacteria,1YGXC@136841|Pseudomonas aeruginosa group	1236|Gammaproteobacteria	-	-	-	-	-	-	-	-	-	-	-	-	-	-	-
PALA52_05264	287.DR97_2500	7.16e-43	140.0	COG2251@1|root,COG2251@2|Bacteria,1N7K7@1224|Proteobacteria,1TCBU@1236|Gammaproteobacteria,1YK5P@136841|Pseudomonas aeruginosa group	1236|Gammaproteobacteria	-	-	-	-	-	-	-	-	-	-	-	-	-	-	-
PALA52_05273	287.DR97_2518	9.5e-64	199.0	COG2928@1|root,COG2928@2|Bacteria,1RK8I@1224|Proteobacteria,1SBKI@1236|Gammaproteobacteria,1YKNK@136841|Pseudomonas aeruginosa group	1236|Gammaproteobacteria	S	Protein of unknown function (DUF502)	-	-	-	-	-	-	-	-	-	-	-	-	DUF502
PALA52_05281	287.DR97_2526	1.89e-275	754.0	COG1566@1|root,COG1566@2|Bacteria,1MU7I@1224|Proteobacteria,1RMAD@1236|Gammaproteobacteria,1YGHN@136841|Pseudomonas aeruginosa group	1236|Gammaproteobacteria	V	HlyD membrane-fusion protein of T1SS	emrA	-	-	ko:K03543	-	M00701	-	-	ko00000,ko00002,ko02000	8.A.1.1	-	-	Biotin_lipoyl_2,HlyD_3,HlyD_D23
PALA52_05282	287.DR97_2527	0.0	977.0	COG0477@1|root,COG2814@2|Bacteria,1MU1I@1224|Proteobacteria,1RNTG@1236|Gammaproteobacteria,1YFJ2@136841|Pseudomonas aeruginosa group	1236|Gammaproteobacteria	EGP	Sugar (and other) transporter	emrB	-	-	ko:K03446	-	M00701	-	-	ko00000,ko00002,ko02000	2.A.1.3	-	-	MFS_1
PALA52_05284	1437882.AZRU01000173_gene994	2.4e-32	117.0	COG2801@1|root,COG2801@2|Bacteria,1MVXQ@1224|Proteobacteria,1RR4F@1236|Gammaproteobacteria,1YDJR@136841|Pseudomonas aeruginosa group	1236|Gammaproteobacteria	L	Integrase core domain	-	-	-	-	-	-	-	-	-	-	-	-	HTH_21,rve
PALA52_05285	287.DR97_1130	2.94e-55	172.0	COG2963@1|root,COG2963@2|Bacteria,1MZ3D@1224|Proteobacteria,1S6K6@1236|Gammaproteobacteria,1YKUJ@136841|Pseudomonas aeruginosa group	1236|Gammaproteobacteria	L	Transposase	-	-	-	ko:K07497	-	-	-	-	ko00000	-	-	-	HTH_Tnp_1
PALA52_05286	287.DR97_1131	2.32e-198	550.0	COG2801@1|root,COG2801@2|Bacteria,1MVN5@1224|Proteobacteria,1RR8F@1236|Gammaproteobacteria,1YH5U@136841|Pseudomonas aeruginosa group	1236|Gammaproteobacteria	L	Integrase core domain	-	-	-	ko:K07497	-	-	-	-	ko00000	-	-	-	HTH_21,rve,rve_3
PALA52_05287	1115512.EH105704_24_00350	2.31e-54	181.0	COG0827@1|root,COG0827@2|Bacteria,1N2RX@1224|Proteobacteria,1RRMN@1236|Gammaproteobacteria	1236|Gammaproteobacteria	L	restriction endonuclease	-	-	-	-	-	-	-	-	-	-	-	-	Eco57I
PALA52_05288	1254432.SCE1572_49525	5.2e-157	462.0	COG0827@1|root,COG0827@2|Bacteria,1N2RX@1224|Proteobacteria,42MGV@68525|delta/epsilon subdivisions,2WKRH@28221|Deltaproteobacteria,2Z2AU@29|Myxococcales	28221|Deltaproteobacteria	L	Eco57I restriction-modification methylase	hsdBM	-	2.1.1.72	ko:K07317	-	-	-	-	ko00000,ko01000,ko02048	-	-	-	Eco57I
PALA52_05289	935567.JAES01000046_gene2355	2.42e-16	75.5	2ENDQ@1|root,33G16@2|Bacteria,1NMNC@1224|Proteobacteria	1224|Proteobacteria	-	-	-	-	-	-	-	-	-	-	-	-	-	-	DUF2786
PALA52_05292	287.DR97_2530	7.28e-213	588.0	COG1091@1|root,COG1091@2|Bacteria,1MUXM@1224|Proteobacteria,1RSNR@1236|Gammaproteobacteria,1YFWJ@136841|Pseudomonas aeruginosa group	1236|Gammaproteobacteria	M	Catalyzes the reduction of dTDP-6-deoxy-L-lyxo-4- hexulose to yield dTDP-L-rhamnose	rfbD	GO:0000271,GO:0003674,GO:0003824,GO:0005575,GO:0005622,GO:0005623,GO:0005737,GO:0005829,GO:0005975,GO:0005976,GO:0006629,GO:0008150,GO:0008152,GO:0008610,GO:0008653,GO:0008831,GO:0009058,GO:0009059,GO:0009103,GO:0009987,GO:0016051,GO:0016491,GO:0016614,GO:0016616,GO:0033692,GO:0034637,GO:0034645,GO:0043170,GO:0044237,GO:0044238,GO:0044249,GO:0044255,GO:0044260,GO:0044262,GO:0044264,GO:0044424,GO:…	1.1.1.133	ko:K00067	ko00521,ko00523,ko01130,map00521,map00523,map01130	M00793	R02777	RC00182	ko00000,ko00001,ko00002,ko01000	-	-	iECSF_1327.ECSF_1929,iEcHS_1320.EcHS_A2180	RmlD_sub_bind
PALA52_05324	287.DR97_2561	0.0	1042.0	COG1866@1|root,COG1866@2|Bacteria,1MWXN@1224|Proteobacteria,1RPM0@1236|Gammaproteobacteria,1YDFU@136841|Pseudomonas aeruginosa group	1236|Gammaproteobacteria	H	Involved in the gluconeogenesis. Catalyzes the conversion of oxaloacetate (OAA) to phosphoenolpyruvate (PEP) through direct phosphoryl transfer between the nucleoside triphosphate and OAA	pckA	GO:0003674,GO:0003824,GO:0004611,GO:0004612,GO:0005575,GO:0005622,GO:0005623,GO:0005737,GO:0005829,GO:0005975,GO:0005996,GO:0006006,GO:0006094,GO:0008150,GO:0008152,GO:0009058,GO:0016051,GO:0016829,GO:0016830,GO:0016831,GO:0019318,GO:0019319,GO:0044238,GO:0044281,GO:0044283,GO:0044424,GO:0044444,GO:0044464,GO:0046364,GO:0071704,GO:1901576	4.1.1.49	ko:K01610	ko00010,ko00020,ko00620,ko00710,ko01100,ko01110,ko01120,ko01130,ko01200,map00010,map00020,map00620,map00710,map01100,map01110,map01120,map01130,map01200	M00003,M00170	R00341	RC00002,RC02741	ko00000,ko00001,ko00002,ko01000	-	-	-	PEPCK_ATP
PALA52_05350	287.DR97_2588	3.35e-189	535.0	COG0477@1|root,COG2814@2|Bacteria,1MWFH@1224|Proteobacteria,1RPAT@1236|Gammaproteobacteria	1236|Gammaproteobacteria	EGP	Major facilitator superfamily	-	-	-	-	-	-	-	-	-	-	-	-	MFS_1,Sugar_tr
PALA52_05370	287.DR97_2608	0.0	1228.0	COG1835@1|root,COG1835@2|Bacteria,1MV2W@1224|Proteobacteria,1RQS2@1236|Gammaproteobacteria,1YG3S@136841|Pseudomonas aeruginosa group	1236|Gammaproteobacteria	I	Acyltransferase family	-	-	-	-	-	-	-	-	-	-	-	-	Acyl_transf_3
PALA52_05385	287.DR97_2624	1.88e-101	295.0	COG5589@1|root,COG5589@2|Bacteria,1N6W5@1224|Proteobacteria,1T136@1236|Gammaproteobacteria,1YKY9@136841|Pseudomonas aeruginosa group	1236|Gammaproteobacteria	S	Protein of unknown function (DUF2390)	-	-	-	-	-	-	-	-	-	-	-	-	DUF2390
PALA52_05392	287.DR97_2630	8.9e-168	470.0	COG1587@1|root,COG1587@2|Bacteria,1MWZD@1224|Proteobacteria,1RM9K@1236|Gammaproteobacteria,1YCXI@136841|Pseudomonas aeruginosa group	1236|Gammaproteobacteria	H	Uroporphyrinogen-III synthase HemD	hemD	GO:0003674,GO:0003824,GO:0004852,GO:0006725,GO:0006778,GO:0006779,GO:0006782,GO:0006783,GO:0006807,GO:0008150,GO:0008152,GO:0009058,GO:0009987,GO:0016829,GO:0016835,GO:0016836,GO:0018130,GO:0019438,GO:0033013,GO:0033014,GO:0034641,GO:0042168,GO:0042440,GO:0044237,GO:0044249,GO:0044271,GO:0046148,GO:0046483,GO:0046501,GO:0051186,GO:0051188,GO:0071704,GO:1901360,GO:1901362,GO:1901564,GO:1901566,GO:…	4.2.1.75	ko:K01719	ko00860,ko01100,ko01110,ko01120,map00860,map01100,map01110,map01120	M00121	R03165	RC01861	ko00000,ko00001,ko00002,ko01000	-	-	iJN746.PP_0187,iSBO_1134.SBO_3815	HEM4
PALA52_05397	287.DR97_2635	2.34e-149	423.0	2AXBE@1|root,31PAH@2|Bacteria,1RJC8@1224|Proteobacteria,1S7IN@1236|Gammaproteobacteria,1YKDB@136841|Pseudomonas aeruginosa group	1236|Gammaproteobacteria	-	-	-	-	-	-	-	-	-	-	-	-	-	-	-
PALA52_05414	287.DR97_2655	6.46e-147	421.0	COG3539@1|root,COG3539@2|Bacteria	2|Bacteria	NU	cell adhesion	-	-	-	ko:K07345	ko05133,map05133	-	-	-	ko00000,ko00001,ko02035,ko02044	-	-	-	-
PALA52_05421	287.DR97_2662	0.0	1291.0	COG1292@1|root,COG1292@2|Bacteria,1MV0K@1224|Proteobacteria,1RP3E@1236|Gammaproteobacteria,1YFC8@136841|Pseudomonas aeruginosa group	1236|Gammaproteobacteria	M	BCCT, betaine/carnitine/choline family transporter	betT	-	-	ko:K02168,ko:K03451	-	-	-	-	ko00000,ko02000	2.A.15,2.A.15.1.3,2.A.15.1.4	-	-	BCCT
PALA52_05448	287.DR97_2689	1.62e-129	367.0	2DQF9@1|root,336H4@2|Bacteria,1N5N6@1224|Proteobacteria,1S9VX@1236|Gammaproteobacteria,1YGDB@136841|Pseudomonas aeruginosa group	1236|Gammaproteobacteria	-	-	-	-	-	-	-	-	-	-	-	-	-	-	-
PALA52_05463	1388763.O165_003985	1.14e-31	113.0	COG2963@1|root,COG2963@2|Bacteria,1RI5G@1224|Proteobacteria,1S8QB@1236|Gammaproteobacteria,1YZHK@136845|Pseudomonas putida group	1236|Gammaproteobacteria	L	Evidence 2b Function of strongly homologous gene	-	-	-	-	-	-	-	-	-	-	-	-	HTH_28
PALA52_05464	287.DR97_3215	7.71e-184	511.0	COG2801@1|root,COG2801@2|Bacteria,1PUMN@1224|Proteobacteria,1RYSS@1236|Gammaproteobacteria	1236|Gammaproteobacteria	L	PFAM Integrase catalytic region	-	-	-	ko:K07497	-	-	-	-	ko00000	-	-	-	HTH_21,rve,rve_3
PALA52_05542	287.DR97_2783	1.66e-34	117.0	2BXT0@1|root,33HDE@2|Bacteria,1NP7I@1224|Proteobacteria,1TBDG@1236|Gammaproteobacteria,1YH8T@136841|Pseudomonas aeruginosa group	1236|Gammaproteobacteria	-	-	-	-	-	-	-	-	-	-	-	-	-	-	-
PALA52_05578	287.DR97_2820	0.0	1402.0	COG1729@1|root,COG1729@2|Bacteria,1MWT4@1224|Proteobacteria,1RMEV@1236|Gammaproteobacteria,1YE26@136841|Pseudomonas aeruginosa group	1236|Gammaproteobacteria	S	Mediates coordination of peptidoglycan synthesis and outer membrane constriction during cell division	-	-	-	-	-	-	-	-	-	-	-	-	-
PALA52_05587	287.DR97_2829	7.28e-305	831.0	COG1134@1|root,COG1134@2|Bacteria,1MWWC@1224|Proteobacteria,1RN2T@1236|Gammaproteobacteria,1YDH3@136841|Pseudomonas aeruginosa group	1236|Gammaproteobacteria	GM	ATPases associated with a variety of cellular activities	wzt	-	-	ko:K09691	ko02010,map02010	M00250	-	-	ko00000,ko00001,ko00002,ko02000	3.A.1.103	-	-	ABC_tran,Wzt_C
PALA52_05623	287.DR97_2865	0.0	1168.0	COG2199@1|root,COG3706@2|Bacteria,1MXAW@1224|Proteobacteria,1RZ41@1236|Gammaproteobacteria,1YD2B@136841|Pseudomonas aeruginosa group	1236|Gammaproteobacteria	T	diguanylate cyclase	pleD	-	2.7.7.65	ko:K13590	ko04112,map04112	-	-	-	ko00000,ko00001,ko01000	-	-	-	GGDEF
PALA52_05642	1243664.CAVL020000026_gene1174	5.84e-15	69.7	COG1464@1|root,COG1464@2|Bacteria,1TQAS@1239|Firmicutes,4HBK0@91061|Bacilli,1ZQ28@1386|Bacillus	91061|Bacilli	P	NLPA lipoprotein	metQ	-	-	ko:K02073	ko02010,map02010	M00238	-	-	ko00000,ko00001,ko00002,ko02000	3.A.1.24	-	-	Lipoprotein_9
PALA52_05654	287.DR97_2896	1.95e-271	744.0	COG1835@1|root,COG1835@2|Bacteria,1RICE@1224|Proteobacteria,1S0I6@1236|Gammaproteobacteria,1YFK6@136841|Pseudomonas aeruginosa group	1236|Gammaproteobacteria	I	Acyltransferase family	-	-	-	-	-	-	-	-	-	-	-	-	Acyl_transf_3
PALA52_05670	287.DR97_2911	2.63e-216	598.0	COG0523@1|root,COG0523@2|Bacteria,1MVZV@1224|Proteobacteria,1RPKP@1236|Gammaproteobacteria,1YDBA@136841|Pseudomonas aeruginosa group	1236|Gammaproteobacteria	S	CobW/HypB/UreG, nucleotide-binding domain	yeiR	GO:0003674,GO:0003824,GO:0003924,GO:0005488,GO:0008270,GO:0016462,GO:0016787,GO:0016817,GO:0016818,GO:0017111,GO:0043167,GO:0043169,GO:0046872,GO:0046914	-	-	-	-	-	-	-	-	-	-	CobW_C,cobW
PALA52_05672	287.DR97_2913	3.22e-133	379.0	297YV@1|root,2ZV50@2|Bacteria,1N204@1224|Proteobacteria,1S2Z1@1236|Gammaproteobacteria,1YKQS@136841|Pseudomonas aeruginosa group	1236|Gammaproteobacteria	S	Protein of unknown function (DUF1826)	-	-	-	-	-	-	-	-	-	-	-	-	DUF1826
PALA52_05682	287.DR97_2923	0.0	1285.0	COG4666@1|root,COG4666@2|Bacteria,1MUNB@1224|Proteobacteria,1RMH7@1236|Gammaproteobacteria,1YFDW@136841|Pseudomonas aeruginosa group	1236|Gammaproteobacteria	S	Tripartite ATP-independent periplasmic transporter, DctM component	-	-	-	-	-	-	-	-	-	-	-	-	DctM
PALA52_05686	287.DR97_2927	1.31e-242	672.0	COG0477@1|root,COG2814@2|Bacteria,1R5DY@1224|Proteobacteria,1S19I@1236|Gammaproteobacteria	1236|Gammaproteobacteria	EGP	Major Facilitator Superfamily	-	-	-	-	-	-	-	-	-	-	-	-	MFS_1
PALA52_05689	287.DR97_2930	8.5e-121	344.0	COG0739@1|root,COG0739@2|Bacteria,1R9V0@1224|Proteobacteria,1RZIG@1236|Gammaproteobacteria,1YJFY@136841|Pseudomonas aeruginosa group	1236|Gammaproteobacteria	M	Peptidase family M23	-	-	-	ko:K21472	-	-	-	-	ko00000,ko01000,ko01002,ko01011	-	-	-	Peptidase_M23
PALA8_00043	287.DR97_2995	7.01e-307	951.0	COG3210@1|root,COG3210@2|Bacteria,1MX2K@1224|Proteobacteria,1RNRK@1236|Gammaproteobacteria,1YD8T@136841|Pseudomonas aeruginosa group	1236|Gammaproteobacteria	U	haemagglutination activity domain	-	-	-	ko:K15125	ko05133,map05133	-	-	-	ko00000,ko00001,ko00536	-	-	-	DUF637,Fil_haemagg,Fil_haemagg_2,Haemagg_act
PALA8_00044	1114970.PSF113_1491	9.72e-128	367.0	COG1943@1|root,COG1943@2|Bacteria,1R75U@1224|Proteobacteria,1S1SP@1236|Gammaproteobacteria	1236|Gammaproteobacteria	L	Transposase IS200 like	-	-	-	ko:K07491	-	-	-	-	ko00000	-	-	-	Y1_Tnp
PALA8_00096	1532557.JL37_17210	3.84e-31	110.0	2EQP0@1|root,33I8Y@2|Bacteria,1NJWY@1224|Proteobacteria,2W69V@28216|Betaproteobacteria	28216|Betaproteobacteria	-	-	-	-	-	-	-	-	-	-	-	-	-	-	-
PALA8_00097	1124983.PFLCHA0_c60570	1.07e-23	92.8	2C5MN@1|root,33A4T@2|Bacteria,1NM6X@1224|Proteobacteria,1SV47@1236|Gammaproteobacteria,1YUCQ@136843|Pseudomonas fluorescens group	1236|Gammaproteobacteria	-	-	-	-	-	-	-	-	-	-	-	-	-	-	-
PALA8_00098	1532557.JL37_19660	1.43e-86	259.0	2F936@1|root,341EU@2|Bacteria,1NZGN@1224|Proteobacteria	1224|Proteobacteria	-	-	-	-	-	-	-	-	-	-	-	-	-	-	-
PALA8_00105	587753.EY04_18315	9.17e-210	584.0	COG0304@1|root,COG0304@2|Bacteria,1R618@1224|Proteobacteria,1S1M0@1236|Gammaproteobacteria	1236|Gammaproteobacteria	IQ	synthase	-	-	2.3.1.41	ko:K00647	ko00061,ko00780,ko01100,ko01212,map00061,map00780,map01100,map01212	M00083,M00572	R04355,R04726,R04952,R04957,R04960,R04963,R04968,R07762,R10115,R10119	RC00039,RC02728,RC02729,RC02888	ko00000,ko00001,ko00002,ko01000,ko01004	-	-	-	-
PALA8_00106	587753.EY04_18320	1.09e-225	622.0	COG1475@1|root,COG1475@2|Bacteria,1RIT4@1224|Proteobacteria,1SZ3U@1236|Gammaproteobacteria	1236|Gammaproteobacteria	K	GHH signature containing HNH/Endo VII superfamily nuclease toxin 2	-	-	-	-	-	-	-	-	-	-	-	-	DUF4150,Tox-GHH2
PALA8_00107	587753.EY04_18325	6.51e-217	598.0	2DREY@1|root,33BF8@2|Bacteria,1NHHP@1224|Proteobacteria,1T4U6@1236|Gammaproteobacteria	1236|Gammaproteobacteria	-	-	-	-	-	-	-	-	-	-	-	-	-	-	-
PALA8_00108	287.DR97_3058	1.4e-253	700.0	COG1413@1|root,COG1413@2|Bacteria,1NUN2@1224|Proteobacteria,1RYE5@1236|Gammaproteobacteria,1YHQE@136841|Pseudomonas aeruginosa group	1236|Gammaproteobacteria	C	lyase activity	-	-	-	-	-	-	-	-	-	-	-	-	HEAT_2
PALA8_00151	1442598.JABW01000005_gene447	2.1e-107	320.0	COG3248@1|root,COG3248@2|Bacteria,1MZ2A@1224|Proteobacteria,4300E@68525|delta/epsilon subdivisions	1224|Proteobacteria	M	Nucleoside-specific channel-forming protein, Tsx	tsx	GO:0003674,GO:0005215,GO:0005337,GO:0005575,GO:0005623,GO:0006810,GO:0008150,GO:0009279,GO:0015267,GO:0015288,GO:0015471,GO:0015858,GO:0015931,GO:0015932,GO:0016020,GO:0016021,GO:0016032,GO:0019058,GO:0019867,GO:0022803,GO:0022829,GO:0022857,GO:0030260,GO:0030312,GO:0030313,GO:0031224,GO:0031975,GO:0032991,GO:0044403,GO:0044409,GO:0044419,GO:0044425,GO:0044462,GO:0044464,GO:0046718,GO:0046930,GO:…	-	ko:K05517	-	-	-	-	ko00000,ko02000	1.B.10	-	iAF1260.b0411,iAPECO1_1312.APECO1_1599,iB21_1397.B21_00363,iBWG_1329.BWG_0293,iE2348C_1286.E2348C_0346,iEC042_1314.EC042_0446,iEC55989_1330.EC55989_0420,iECABU_c1320.ECABU_c04890,iECBD_1354.ECBD_3250,iECDH10B_1368.ECDH10B_0367,iECDH1ME8569_1439.ECDH1ME8569_0396,iECD_1391.ECD_00359,iECED1_1282.ECED1_0434,iECH74115_1262.ECH74115_0493,iECIAI1_1343.ECIAI1_0411,iECIAI39_1322.ECIAI39_0268,iECNA114_1301…	Channel_Tsx
PALA8_00194	287.DR97_3143	9.79e-191	530.0	COG2175@1|root,COG2175@2|Bacteria,1R5KS@1224|Proteobacteria,1RZQ2@1236|Gammaproteobacteria	1236|Gammaproteobacteria	Q	PFAM Taurine catabolism dioxygenase TauD, TfdA family	-	-	-	-	-	-	-	-	-	-	-	-	TauD
PALA8_00195	287.DR97_3144	2.12e-196	546.0	COG0679@1|root,COG0679@2|Bacteria,1P2SH@1224|Proteobacteria,1RYK8@1236|Gammaproteobacteria,1YFPS@136841|Pseudomonas aeruginosa group	1224|Proteobacteria	S	Membrane transport protein	-	-	-	ko:K07088	-	-	-	-	ko00000	-	-	-	Mem_trans
PALA8_00253	287.DR97_3208	4.64e-142	402.0	2EMUA@1|root,33FGN@2|Bacteria,1R7BJ@1224|Proteobacteria	1224|Proteobacteria	S	Suppressor of fused protein (SUFU)	-	-	-	-	-	-	-	-	-	-	-	-	SUFU
PALA8_00261	587753.EY04_23945	0.0	1011.0	COG0596@1|root,COG0596@2|Bacteria,1MY2P@1224|Proteobacteria,1RQQM@1236|Gammaproteobacteria	1236|Gammaproteobacteria	D	nuclear chromosome segregation	-	-	-	-	-	-	-	-	-	-	-	-	Abhydrolase_8,DUF3274,DUF4150
PALA8_00264	287.DR97_3222	2.11e-295	804.0	COG1562@1|root,COG1562@2|Bacteria,1P0S5@1224|Proteobacteria	1224|Proteobacteria	I	ergosterol biosynthetic process	-	-	-	-	-	-	-	-	-	-	-	-	-
PALA8_00265	287.DR97_3223	0.0	1192.0	COG1075@1|root,COG1075@2|Bacteria,1RAUT@1224|Proteobacteria,1RPQ0@1236|Gammaproteobacteria	1236|Gammaproteobacteria	S	acetyltransferases and hydrolases with the alpha beta hydrolase fold	-	-	-	-	-	-	-	-	-	-	-	-	LCAT,PGAP1
PALA8_00266	287.DR97_3224	0.0	1609.0	COG3501@1|root,COG4253@1|root,COG3501@2|Bacteria,COG4253@2|Bacteria,1MU7Q@1224|Proteobacteria,1RN6G@1236|Gammaproteobacteria,1YI7R@136841|Pseudomonas aeruginosa group	1236|Gammaproteobacteria	S	Uncharacterized protein conserved in bacteria (DUF2345)	-	-	-	ko:K11904	ko03070,map03070	M00334	-	-	ko00000,ko00001,ko00002,ko02044	3.A.23.1	-	-	DUF2345,Phage_GPD,T6SS_Vgr
PALA8_00335	287.DR97_3293	4.67e-174	485.0	COG0110@1|root,COG0110@2|Bacteria,1MUCJ@1224|Proteobacteria,1RPPT@1236|Gammaproteobacteria,1YH5J@136841|Pseudomonas aeruginosa group	1236|Gammaproteobacteria	S	Bacterial transferase hexapeptide (six repeats)	cat	-	2.3.1.28	ko:K00638,ko:K18234	-	-	-	-	br01600,ko00000,ko01000,ko01504	-	-	-	Hexapep
PALA8_00369	1390370.O203_03710	3.62e-57	181.0	2F9WI@1|root,3425Z@2|Bacteria,1NYFR@1224|Proteobacteria,1SQN0@1236|Gammaproteobacteria,1YIGN@136841|Pseudomonas aeruginosa group	1236|Gammaproteobacteria	-	-	-	-	-	-	-	-	-	-	-	-	-	-	-
PALA8_00402	287.DR97_3359	2.97e-30	107.0	COG1872@1|root,COG1872@2|Bacteria,1MZ4E@1224|Proteobacteria,1S9AB@1236|Gammaproteobacteria,1YGP6@136841|Pseudomonas aeruginosa group	1236|Gammaproteobacteria	S	Belongs to the UPF0235 family	yggU	-	-	ko:K09131	-	-	-	-	ko00000	-	-	-	DUF167
PALA8_00425	287.DR97_3381	0.0	1168.0	COG0643@1|root,COG0784@1|root,COG2198@1|root,COG0643@2|Bacteria,COG0784@2|Bacteria,COG2198@2|Bacteria,1MUAG@1224|Proteobacteria,1RMS6@1236|Gammaproteobacteria,1YEZ2@136841|Pseudomonas aeruginosa group	1236|Gammaproteobacteria	T	Signal transducing histidine kinase, homodimeric domain	chpA	-	-	ko:K02487,ko:K06596	ko02020,ko02025,map02020,map02025	M00507	-	-	ko00000,ko00001,ko00002,ko01001,ko02022,ko02035	-	-	-	CheW,H-kinase_dim,HATPase_c,Hpt,Response_reg
PALA8_00481	287.DR97_3438	0.0	1609.0	COG4773@1|root,COG4773@2|Bacteria,1QTT0@1224|Proteobacteria,1RNBT@1236|Gammaproteobacteria,1YE8E@136841|Pseudomonas aeruginosa group	1236|Gammaproteobacteria	P	receptor	fiuA	-	-	ko:K02014	-	-	-	-	ko00000,ko02000	1.B.14	-	-	Plug,TonB_dep_Rec
PALA8_00486	287.DR97_3443	8.88e-126	358.0	COG1309@1|root,COG1309@2|Bacteria,1N8IR@1224|Proteobacteria,1ST23@1236|Gammaproteobacteria,1YH6M@136841|Pseudomonas aeruginosa group	1236|Gammaproteobacteria	K	Bacterial regulatory proteins, tetR family	-	-	-	-	-	-	-	-	-	-	-	-	TetR_N
PALA8_00508	587753.EY04_18050	4.64e-24	99.0	COG3539@1|root,COG3539@2|Bacteria,1R9JR@1224|Proteobacteria,1RY0Z@1236|Gammaproteobacteria	1236|Gammaproteobacteria	NU	Fimbrial protein	-	-	-	-	-	-	-	-	-	-	-	-	Fimbrial
PALA8_00515	1192868.CAIU01000023_gene3301	1.68e-17	80.5	COG1960@1|root,COG1960@2|Bacteria,1MU20@1224|Proteobacteria,2TQJS@28211|Alphaproteobacteria,43HY2@69277|Phyllobacteriaceae	28211|Alphaproteobacteria	I	acyl-CoA dehydrogenase	MA20_19860	-	1.3.8.7	ko:K00249	ko00071,ko00280,ko00410,ko00640,ko01100,ko01110,ko01130,ko01200,ko01212,ko03320,map00071,map00280,map00410,map00640,map01100,map01110,map01130,map01200,map01212,map03320	M00013,M00036,M00087	R00924,R01175,R01279,R02661,R03172,R03777,R03857,R03990,R04095,R04432,R04751,R04754	RC00052,RC00068,RC00076,RC00095,RC00148,RC00246	ko00000,ko00001,ko00002,ko01000	-	-	-	Acyl-CoA_dh_1,Acyl-CoA_dh_C,Acyl-CoA_dh_M,Acyl-CoA_dh_N,AcylCoA_DH_N
PALA8_00517	287.DR97_3475	0.0	1191.0	COG1960@1|root,COG1960@2|Bacteria,1MU20@1224|Proteobacteria,1RNV1@1236|Gammaproteobacteria,1YDDF@136841|Pseudomonas aeruginosa group	1236|Gammaproteobacteria	I	Acyl-CoA dehydrogenase N terminal	-	-	-	-	-	-	-	-	-	-	-	-	Acyl-CoA_dh_1,Acyl-CoA_dh_C,Acyl-CoA_dh_M,Acyl-CoA_dh_N,AcylCoA_DH_N
PALA8_00527	287.DR97_3485	2.25e-65	200.0	COG2010@1|root,COG2010@2|Bacteria,1N73U@1224|Proteobacteria,1SFGZ@1236|Gammaproteobacteria,1YK2T@136841|Pseudomonas aeruginosa group	1236|Gammaproteobacteria	C	Cytochrome C oxidase, cbb3-type, subunit III	nirC	-	-	ko:K19344	-	-	-	-	ko00000	-	-	-	Cytochrome_CBB3
PALA8_00583	287.DR97_3541	7.64e-78	231.0	COG0551@1|root,COG0551@2|Bacteria,1PZFI@1224|Proteobacteria,1RQ64@1236|Gammaproteobacteria,1YE2S@136841|Pseudomonas aeruginosa group	1236|Gammaproteobacteria	L	Nuclease-related domain	-	-	-	-	-	-	-	-	-	-	-	-	NERD,zf-C4_Topoisom
PALA8_00585	76869.PputGB1_0416	5.96e-23	89.7	COG0582@1|root,COG0582@2|Bacteria,1NWGS@1224|Proteobacteria,1RPST@1236|Gammaproteobacteria	1236|Gammaproteobacteria	L	Belongs to the 'phage' integrase family	rci	-	-	-	-	-	-	-	-	-	-	-	Phage_integrase
PALA8_00607	287.DR97_3564	0.0	1751.0	COG1452@1|root,COG1452@2|Bacteria,1MUJC@1224|Proteobacteria,1RQEX@1236|Gammaproteobacteria,1YEAB@136841|Pseudomonas aeruginosa group	1236|Gammaproteobacteria	M	Together with LptE, is involved in the assembly of lipopolysaccharide (LPS) at the surface of the outer membrane	lptD	GO:0005575,GO:0005623,GO:0006810,GO:0006869,GO:0008150,GO:0009279,GO:0009636,GO:0009987,GO:0010876,GO:0015920,GO:0016020,GO:0016043,GO:0019867,GO:0022607,GO:0030312,GO:0030313,GO:0031975,GO:0033036,GO:0042221,GO:0043163,GO:0043165,GO:0044085,GO:0044091,GO:0044462,GO:0044464,GO:0045229,GO:0050896,GO:0051179,GO:0051234,GO:0061024,GO:0071702,GO:0071709,GO:0071840,GO:0071944,GO:1901264	-	ko:K04744	-	-	-	-	ko00000,ko02000	1.B.42.1	-	iG2583_1286.G2583_0058	OstA,OstA_C
PALA8_00628	287.DR97_3585	1.03e-122	349.0	2DNH4@1|root,32XGS@2|Bacteria,1N1FJ@1224|Proteobacteria,1SZPT@1236|Gammaproteobacteria	1236|Gammaproteobacteria	-	-	-	-	-	-	-	-	-	-	-	-	-	-	-
PALA8_00629	287.DR97_3586	1.34e-109	317.0	COG4540@1|root,COG4540@2|Bacteria,1NZ67@1224|Proteobacteria,1SQ45@1236|Gammaproteobacteria,1YIGX@136841|Pseudomonas aeruginosa group	1236|Gammaproteobacteria	S	Type VI secretion system, phage-baseplate injector	gpV	-	-	-	-	-	-	-	-	-	-	-	Phage_base_V
PALA8_00630	287.DR97_3587	1.51e-69	210.0	COG3628@1|root,COG3628@2|Bacteria,1N7WS@1224|Proteobacteria,1SCD1@1236|Gammaproteobacteria,1YJZQ@136841|Pseudomonas aeruginosa group	1236|Gammaproteobacteria	S	Gene 25-like lysozyme	gpW	-	-	ko:K06903	-	-	-	-	ko00000	-	-	-	GPW_gp25
PALA8_00631	287.DR97_3588	3.83e-200	555.0	COG3948@1|root,COG3948@2|Bacteria,1MUFF@1224|Proteobacteria,1RNBJ@1236|Gammaproteobacteria,1YID9@136841|Pseudomonas aeruginosa group	1236|Gammaproteobacteria	S	Baseplate J-like protein	J	-	-	-	-	-	-	-	-	-	-	-	Baseplate_J
PALA8_00632	287.DR97_3589	2.41e-124	354.0	COG4385@1|root,COG4385@2|Bacteria,1NZST@1224|Proteobacteria,1RQRK@1236|Gammaproteobacteria,1YFVW@136841|Pseudomonas aeruginosa group	1236|Gammaproteobacteria	S	Phage tail protein (Tail_P2_I)	gpI	-	-	-	-	-	-	-	-	-	-	-	Tail_P2_I
PALA8_00633	287.DR97_3590	0.0	1186.0	COG5301@1|root,COG5301@2|Bacteria,1MWNN@1224|Proteobacteria,1SP2T@1236|Gammaproteobacteria,1YG5U@136841|Pseudomonas aeruginosa group	1236|Gammaproteobacteria	S	Phage tail-collar fibre protein	-	-	-	-	-	-	-	-	-	-	-	-	DUF3751
PALA8_00634	287.DR97_3591	8.7e-78	234.0	2CG4G@1|root,33GX7@2|Bacteria,1NBVG@1224|Proteobacteria	1224|Proteobacteria	-	-	-	-	-	-	-	-	-	-	-	-	-	-	Phage_tail_APC
PALA8_00635	287.DR97_3592	1.96e-273	748.0	COG3497@1|root,COG3497@2|Bacteria,1MW1V@1224|Proteobacteria,1RNUT@1236|Gammaproteobacteria,1YKUD@136841|Pseudomonas aeruginosa group	1236|Gammaproteobacteria	S	Phage tail sheath C-terminal domain	gpFI	-	-	ko:K06907	-	-	-	-	ko00000	-	-	-	Phage_sheath_1,Phage_sheath_1C
PALA8_00636	287.DR97_3593	4.56e-115	330.0	COG3498@1|root,COG3498@2|Bacteria,1Q8HB@1224|Proteobacteria,1SNG1@1236|Gammaproteobacteria,1YJ1Z@136841|Pseudomonas aeruginosa group	1236|Gammaproteobacteria	S	Phage tail tube protein FII	-	-	-	ko:K06908	-	-	-	-	ko00000	-	-	-	Phage_tube
PALA8_00637	287.DR97_3594	4.55e-76	227.0	2EFU7@1|root,339KB@2|Bacteria,1NH5H@1224|Proteobacteria,1SRM7@1236|Gammaproteobacteria,1YJZR@136841|Pseudomonas aeruginosa group	1236|Gammaproteobacteria	S	Phage tail assembly chaperone proteins, E, or 41 or 14	-	-	-	-	-	-	-	-	-	-	-	-	Phage_TAC_7
PALA8_00638	287.DR97_3595	0.0	1112.0	COG5283@1|root,COG5283@2|Bacteria,1PDPW@1224|Proteobacteria,1TBZD@1236|Gammaproteobacteria,1YJHX@136841|Pseudomonas aeruginosa group	1236|Gammaproteobacteria	-	-	-	-	-	-	-	-	-	-	-	-	-	-	-
PALA8_00639	287.DR97_3596	2.23e-201	558.0	COG3499@1|root,COG3499@2|Bacteria,1N88T@1224|Proteobacteria,1SB6U@1236|Gammaproteobacteria	1236|Gammaproteobacteria	S	Phage P2 GpU	-	-	-	ko:K06906	-	-	-	-	ko00000	-	-	-	Phage_P2_GpU
PALA8_00640	287.DR97_3597	3.13e-46	148.0	COG5004@1|root,COG5004@2|Bacteria,1QFEC@1224|Proteobacteria,1TCN7@1236|Gammaproteobacteria,1YKGF@136841|Pseudomonas aeruginosa group	1236|Gammaproteobacteria	S	Phage Tail Protein X	-	-	-	-	-	-	-	-	-	-	-	-	Phage_tail_X
PALA8_00641	287.DR97_3598	1.34e-233	643.0	COG3500@1|root,COG3500@2|Bacteria,1MXT8@1224|Proteobacteria,1RMKC@1236|Gammaproteobacteria,1YJF1@136841|Pseudomonas aeruginosa group	1236|Gammaproteobacteria	S	Phage late control gene D protein (GPD)	-	-	-	ko:K06905	-	-	-	-	ko00000	-	-	-	Phage_GPD
PALA8_00655	69328.PVLB_18670	9.15e-40	149.0	2DQ30@1|root,334J4@2|Bacteria,1QVFA@1224|Proteobacteria	1224|Proteobacteria	-	-	-	-	-	-	-	-	-	-	-	-	-	-	DUF2793
PALA8_00734	287.DR97_3680	2.53e-141	409.0	COG1169@1|root,COG1169@2|Bacteria,1MVB7@1224|Proteobacteria,1RRBX@1236|Gammaproteobacteria	1236|Gammaproteobacteria	HQ	Isochorismate synthase	entC	GO:0000287,GO:0003674,GO:0003824,GO:0005488,GO:0006518,GO:0006725,GO:0006807,GO:0008150,GO:0008152,GO:0008909,GO:0009058,GO:0009237,GO:0009238,GO:0009239,GO:0009712,GO:0009713,GO:0009987,GO:0016853,GO:0016866,GO:0018130,GO:0018958,GO:0019184,GO:0019290,GO:0019438,GO:0019540,GO:0019748,GO:0034641,GO:0043043,GO:0043167,GO:0043169,GO:0043603,GO:0043604,GO:0044237,GO:0044249,GO:0044271,GO:0044550,GO:…	5.4.4.2	ko:K01851,ko:K02361	ko00130,ko01053,ko01100,ko01110,ko01130,map00130,map01053,map01100,map01110,map01130	M00116	R01717	RC00588	ko00000,ko00001,ko00002,ko01000	-	-	iEC55989_1330.EC55989_0585,iECIAI1_1343.ECIAI1_0577,iECO103_1326.ECO103_0601,iECO111_1330.ECO111_0623,iECO26_1355.ECO26_0668,iECW_1372.ECW_m0648,iEKO11_1354.EKO11_3272,iEcE24377_1341.EcE24377A_0613,iSbBS512_1146.SbBS512_E0495,iUMNK88_1353.UMNK88_626,iWFL_1372.ECW_m0648	Chorismate_bind
PALA8_00754	287.DR97_3700	7.66e-125	354.0	COG3631@1|root,COG3631@2|Bacteria,1RF40@1224|Proteobacteria,1S3ZH@1236|Gammaproteobacteria	1236|Gammaproteobacteria	S	Phenazine biosynthesis protein A/B	phzB	-	-	ko:K20260	ko00405,ko01130,ko02024,map00405,map01130,map02024	M00835	R11493	RC03452	ko00000,ko00001,ko00002	-	-	-	PHZA_PHZB
PALA8_00854	287.DR97_3765	2.34e-208	576.0	COG0583@1|root,COG0583@2|Bacteria,1N8HZ@1224|Proteobacteria,1RR4Z@1236|Gammaproteobacteria,1YEVG@136841|Pseudomonas aeruginosa group	1236|Gammaproteobacteria	K	LysR substrate binding domain	yneJ	-	-	-	-	-	-	-	-	-	-	-	HTH_1,LysR_substrate
PALA8_00855	287.DR97_3766	5.87e-177	493.0	COG1028@1|root,COG1028@2|Bacteria,1PDPY@1224|Proteobacteria,1RWKR@1236|Gammaproteobacteria,1YK4N@136841|Pseudomonas aeruginosa group	1236|Gammaproteobacteria	IQ	Enoyl-(Acyl carrier protein) reductase	-	-	-	-	-	-	-	-	-	-	-	-	adh_short_C2
PALA8_00888	1038922.PflQ2_3019	1.52e-14	74.7	2C96D@1|root,32T4A@2|Bacteria,1R6M6@1224|Proteobacteria,1SZRT@1236|Gammaproteobacteria	1236|Gammaproteobacteria	S	Protein of unknown function (DUF3156)	-	-	-	-	-	-	-	-	-	-	-	-	DUF3156
PALA8_00920	287.DR97_3827	2.91e-231	637.0	2DM5E@1|root,31SVN@2|Bacteria,1MYKR@1224|Proteobacteria,1SF2N@1236|Gammaproteobacteria,1YESB@136841|Pseudomonas aeruginosa group	1236|Gammaproteobacteria	S	Domain of unknown function (DUF4340)	-	-	-	-	-	-	-	-	-	-	-	-	DUF4340
PALA8_00999	1221522.B723_27915	0.0	981.0	COG0582@1|root,COG0582@2|Bacteria,1N5SB@1224|Proteobacteria,1SJZK@1236|Gammaproteobacteria	1236|Gammaproteobacteria	L	Belongs to the 'phage' integrase family	-	-	-	-	-	-	-	-	-	-	-	-	Phage_integrase
PALA8_01000	1221522.B723_27910	0.0	1251.0	COG0582@1|root,COG0582@2|Bacteria,1RKWA@1224|Proteobacteria,1SIUC@1236|Gammaproteobacteria	1236|Gammaproteobacteria	L	viral genome integration into host DNA	-	-	-	-	-	-	-	-	-	-	-	-	-
PALA8_01001	1117958.PE143B_0100785	0.0	1365.0	COG0582@1|root,COG0582@2|Bacteria,1RD98@1224|Proteobacteria,1S5AV@1236|Gammaproteobacteria	1236|Gammaproteobacteria	L	viral genome integration into host DNA	-	-	-	-	-	-	-	-	-	-	-	-	Phage_integrase
PALA8_01002	1117958.PE143B_0100790	2.58e-45	146.0	COG1396@1|root,COG1396@2|Bacteria,1N721@1224|Proteobacteria,1SYKG@1236|Gammaproteobacteria	1236|Gammaproteobacteria	K	Transcriptional	-	-	-	-	-	-	-	-	-	-	-	-	HTH_3
PALA8_01003	1117958.PE143B_0100795	1.87e-133	378.0	2EAZT@1|root,3350N@2|Bacteria,1NC4Z@1224|Proteobacteria,1SF1G@1236|Gammaproteobacteria	1236|Gammaproteobacteria	-	-	-	-	-	-	-	-	-	-	-	-	-	-	-
PALA8_01004	1117958.PE143B_0100800	0.0	943.0	COG1061@1|root,COG1061@2|Bacteria,1N52C@1224|Proteobacteria,1RSQN@1236|Gammaproteobacteria	1236|Gammaproteobacteria	L	COG1061 DNA or RNA helicases of superfamily II	-	-	-	-	-	-	-	-	-	-	-	-	Helicase_C,ResIII
PALA8_01005	1207076.ALAT01000176_gene2002	2.58e-35	123.0	2AUSE@1|root,31KFF@2|Bacteria,1QIA7@1224|Proteobacteria,1TG4B@1236|Gammaproteobacteria,1Z3FS@136846|Pseudomonas stutzeri group	1236|Gammaproteobacteria	-	-	-	-	-	-	-	-	-	-	-	-	-	-	-
PALA8_01006	1117958.PE143B_0100810	5.41e-65	198.0	COG3436@1|root,COG3436@2|Bacteria,1RHJ1@1224|Proteobacteria,1S5UN@1236|Gammaproteobacteria	1236|Gammaproteobacteria	L	Transposase	-	-	-	ko:K07484	-	-	-	-	ko00000	-	-	-	TnpB_IS66
PALA8_01007	1117958.PE143B_0100815	7.2e-90	263.0	COG3039@1|root,COG3039@2|Bacteria,1MVDK@1224|Proteobacteria,1RR0T@1236|Gammaproteobacteria	1236|Gammaproteobacteria	L	COG3039 Transposase and inactivated derivatives IS5 family	-	-	-	ko:K07481	-	-	-	-	ko00000	-	-	-	DDE_Tnp_1,DUF772
PALA8_01008	1117958.PE143B_0100820	1.92e-206	571.0	COG0583@1|root,COG0583@2|Bacteria,1R8CE@1224|Proteobacteria,1RYKT@1236|Gammaproteobacteria	1236|Gammaproteobacteria	K	transcriptional regulator	-	-	-	-	-	-	-	-	-	-	-	-	HTH_1,LysR_substrate
PALA8_01009	1117958.PE143B_0100825	1.16e-242	666.0	COG1052@1|root,COG1052@2|Bacteria,1MU2D@1224|Proteobacteria,1RMGZ@1236|Gammaproteobacteria	1236|Gammaproteobacteria	CH	Catalyzes the NADPH-dependent reduction of glyoxylate and hydroxypyruvate into glycolate and glycerate, respectively	-	-	1.20.1.1	ko:K18916	-	-	-	-	ko00000,ko01000	-	-	-	2-Hacid_dh,2-Hacid_dh_C
PALA8_01010	1117958.PE143B_0100830	3.14e-189	526.0	COG3639@1|root,COG3639@2|Bacteria,1MW4F@1224|Proteobacteria,1RSR1@1236|Gammaproteobacteria	1236|Gammaproteobacteria	P	Phosphonate ABC transporter	phnE_2	-	-	ko:K02042	ko02010,map02010	M00223	-	-	ko00000,ko00001,ko00002,ko02000	3.A.1.9	-	-	BPD_transp_1
PALA8_01011	1117958.PE143B_0100835	1.19e-199	553.0	COG3221@1|root,COG3221@2|Bacteria,1MWFF@1224|Proteobacteria,1RPX1@1236|Gammaproteobacteria	1236|Gammaproteobacteria	P	Phosphonate ABC transporter	phnD	-	-	ko:K02044	ko02010,map02010	M00223	-	-	ko00000,ko00001,ko00002,ko02000	3.A.1.9	-	-	Phosphonate-bd
PALA8_01012	1117958.PE143B_0100840	6.33e-189	525.0	COG3638@1|root,COG3638@2|Bacteria,1MVE9@1224|Proteobacteria	1224|Proteobacteria	P	Part of the ABC transporter complex PhnCDE involved in phosphonates import. Responsible for energy coupling to the transport system	phnC	-	3.6.3.28	ko:K02041	ko02010,map02010	M00223	-	-	ko00000,ko00001,ko00002,ko01000,ko02000	3.A.1.9	-	-	ABC_tran
PALA8_01013	1117958.PE143B_0100845	2.73e-159	445.0	COG3039@1|root,COG3039@2|Bacteria,1MVDK@1224|Proteobacteria,1RR0T@1236|Gammaproteobacteria	1236|Gammaproteobacteria	L	COG3039 Transposase and inactivated derivatives IS5 family	-	-	-	ko:K07481	-	-	-	-	ko00000	-	-	-	DDE_Tnp_1,DUF772
PALA8_01014	1117958.PE143B_0100860	0.0	869.0	COG3344@1|root,COG3344@2|Bacteria,1MVI1@1224|Proteobacteria,1RQP7@1236|Gammaproteobacteria	1236|Gammaproteobacteria	L	reverse transcriptase	-	-	-	-	-	-	-	-	-	-	-	-	GIIM,RVT_1
PALA8_01016	1117958.PE143B_0100875	0.0	999.0	COG2114@1|root,COG2114@2|Bacteria,1PPD3@1224|Proteobacteria	1224|Proteobacteria	T	Pfam Adenylate and Guanylate cyclase catalytic domain	-	-	-	-	-	-	-	-	-	-	-	-	Guanylate_cyc
PALA8_01017	1117958.PE143B_0100880	9.27e-219	603.0	COG0664@1|root,COG4271@1|root,COG0664@2|Bacteria,COG4271@2|Bacteria,1R4Z7@1224|Proteobacteria	1224|Proteobacteria	K	nucleotide-binding protein	-	-	-	-	-	-	-	-	-	-	-	-	TIR-like,cNMP_binding
PALA8_01022	287.DR97_3910	7.67e-105	302.0	COG0346@1|root,COG0346@2|Bacteria,1RH4D@1224|Proteobacteria,1S6J6@1236|Gammaproteobacteria,1YGDQ@136841|Pseudomonas aeruginosa group	1236|Gammaproteobacteria	E	Glyoxalase/Bleomycin resistance protein/Dioxygenase superfamily	-	-	-	-	-	-	-	-	-	-	-	-	Glyoxalase
PALA8_01026	287.DR97_3914	1.25e-138	395.0	COG3416@1|root,COG3416@2|Bacteria,1P8CZ@1224|Proteobacteria,1S3YQ@1236|Gammaproteobacteria,1YG5G@136841|Pseudomonas aeruginosa group	1236|Gammaproteobacteria	S	Uncharacterized protein conserved in bacteria (DUF2076)	yba2	-	-	ko:K09945	-	-	-	-	ko00000	-	-	-	DUF2076
PALA8_01060	1301098.PKB_2821	1.49e-76	240.0	COG5607@1|root,COG5607@2|Bacteria,1R5I1@1224|Proteobacteria,1SDXG@1236|Gammaproteobacteria	1236|Gammaproteobacteria	S	Metal-chelation protein CHAD	-	-	-	-	-	-	-	-	-	-	-	-	CHAD
PALA8_01062	1437882.AZRU01000002_gene2403	2.8e-54	174.0	COG0394@1|root,COG0394@2|Bacteria,1QV1X@1224|Proteobacteria,1T26E@1236|Gammaproteobacteria,1YEYF@136841|Pseudomonas aeruginosa group	1236|Gammaproteobacteria	T	Low molecular weight phosphatase family	-	-	1.20.4.1	ko:K03741	-	-	-	-	ko00000,ko01000	-	-	-	LMWPc
PALA8_01083	287.DR97_3967	5.35e-29	107.0	COG1595@1|root,COG1595@2|Bacteria,1MYKC@1224|Proteobacteria,1S6T0@1236|Gammaproteobacteria,1YFXK@136841|Pseudomonas aeruginosa group	1236|Gammaproteobacteria	K	ECF sigma factor	-	-	-	ko:K03088	-	-	-	-	ko00000,ko03021	-	-	-	Sigma70_r2,Sigma70_r4_2
PALA8_01110	287.DR97_3995	0.0	1067.0	COG1140@1|root,COG1140@2|Bacteria,1MW9Q@1224|Proteobacteria,1RNMJ@1236|Gammaproteobacteria,1YFMA@136841|Pseudomonas aeruginosa group	1236|Gammaproteobacteria	C	Respiratory nitrate reductase beta C-terminal	narH	-	1.7.5.1	ko:K00371	ko00910,ko01120,ko02020,map00910,map01120,map02020	M00529,M00530,M00804	R00798,R01106,R09497	RC02812	ko00000,ko00001,ko00002,ko01000	5.A.3.1	-	-	Fer4_11,Nitr_red_bet_C
PALA8_01115	1198452.Jab_2c15260	1.44e-40	142.0	COG2041@1|root,COG2041@2|Bacteria,1RKA7@1224|Proteobacteria	1224|Proteobacteria	S	Oxidoreductase molybdopterin binding domain	-	-	-	-	-	-	-	-	-	-	-	-	Oxidored_molyb
PALA8_01116	1397284.AYMN01000110_gene2225	9.05e-220	634.0	COG1629@1|root,COG4771@2|Bacteria,1MW7D@1224|Proteobacteria,1RNET@1236|Gammaproteobacteria,402M8@613|Serratia	1236|Gammaproteobacteria	P	TonB dependent receptor	-	-	-	ko:K02014	-	-	-	-	ko00000,ko02000	1.B.14	-	-	Plug,TonB_dep_Rec
PALA8_01121	287.DR97_4005	9.69e-161	461.0	COG0513@1|root,COG0513@2|Bacteria,1MU49@1224|Proteobacteria,1RMWA@1236|Gammaproteobacteria,1YE6B@136841|Pseudomonas aeruginosa group	1236|Gammaproteobacteria	JKL	DEAD-box RNA helicase involved in RNA degradation. Has RNA-dependent ATPase activity and unwinds double-stranded RNA	rhlB	GO:0003674,GO:0003724,GO:0003824,GO:0004004,GO:0004386,GO:0005488,GO:0005515,GO:0005575,GO:0005622,GO:0005623,GO:0005737,GO:0005829,GO:0006139,GO:0006401,GO:0006725,GO:0006807,GO:0008026,GO:0008150,GO:0008152,GO:0008186,GO:0009056,GO:0009057,GO:0009987,GO:0010501,GO:0016070,GO:0016462,GO:0016787,GO:0016817,GO:0016818,GO:0016887,GO:0017111,GO:0019439,GO:0019904,GO:0034641,GO:0034655,GO:0042623,GO:…	3.6.4.13	ko:K03732	ko03018,map03018	M00394	-	-	ko00000,ko00001,ko00002,ko01000,ko03019	-	-	-	DEAD,Helicase_C,RhlB
PALA8_01140	930166.CD58_00415	4.45e-206	573.0	COG0604@1|root,COG0604@2|Bacteria,1MX8A@1224|Proteobacteria,1RPRD@1236|Gammaproteobacteria	1236|Gammaproteobacteria	C	COG0604 NADPH quinone reductase and related Zn-dependent oxidoreductases	-	-	-	-	-	-	-	-	-	-	-	-	ADH_N,ADH_zinc_N_2
PALA8_01141	399739.Pmen_1500	1.35e-57	179.0	COG0640@1|root,COG0640@2|Bacteria	2|Bacteria	K	DNA-binding transcription factor activity	arsR3	GO:0001067,GO:0003674,GO:0003676,GO:0003677,GO:0005488,GO:0006355,GO:0008150,GO:0009889,GO:0010468,GO:0010556,GO:0019219,GO:0019222,GO:0031323,GO:0031326,GO:0044212,GO:0050789,GO:0050794,GO:0051171,GO:0051252,GO:0060255,GO:0065007,GO:0080090,GO:0097159,GO:1901363,GO:1903506,GO:2000112,GO:2001141	-	-	-	-	-	-	-	-	-	-	HTH_20,HTH_5
PALA8_01162	1437882.AZRU01000006_gene1499	1.85e-191	535.0	COG0582@1|root,COG0582@2|Bacteria,1NWGS@1224|Proteobacteria,1S1RT@1236|Gammaproteobacteria,1YG3N@136841|Pseudomonas aeruginosa group	1236|Gammaproteobacteria	L	Phage integrase family	-	-	-	-	-	-	-	-	-	-	-	-	Phage_integrase
PALA8_01163	642227.HA49_01680	2.78e-111	331.0	COG0758@1|root,COG0758@2|Bacteria,1R5PU@1224|Proteobacteria,1S1AD@1236|Gammaproteobacteria	1236|Gammaproteobacteria	LU	DNA recombination-mediator protein A	-	-	-	-	-	-	-	-	-	-	-	-	DNA_processg_A
PALA8_01167	322710.Avin_40680	5.62e-11	65.9	2DGBY@1|root,2ZVCM@2|Bacteria	2|Bacteria	-	-	-	-	-	-	-	-	-	-	-	-	-	-	-
PALA8_01173	1240350.AMZE01000050_gene900	5.06e-17	75.1	2AYYD@1|root,31R47@2|Bacteria,1QNNR@1224|Proteobacteria,1TM9A@1236|Gammaproteobacteria,1YZ9S@136845|Pseudomonas putida group	1236|Gammaproteobacteria	S	Arc-like DNA binding domain	-	-	-	-	-	-	-	-	-	-	-	-	Arc
PALA8_01175	1437882.AZRU01000006_gene1509	3.42e-48	157.0	2BH7R@1|root,32B90@2|Bacteria,1QF5E@1224|Proteobacteria,1TC8H@1236|Gammaproteobacteria,1YK1S@136841|Pseudomonas aeruginosa group	1236|Gammaproteobacteria	S	helix_turn_helix, Lux Regulon	-	-	-	-	-	-	-	-	-	-	-	-	-
PALA8_01176	1294143.H681_23130	3.02e-160	449.0	COG2442@1|root,COG2442@2|Bacteria,1REK1@1224|Proteobacteria,1S4WC@1236|Gammaproteobacteria	1236|Gammaproteobacteria	S	InterPro IPR007367	-	-	-	-	-	-	-	-	-	-	-	-	DUF433
PALA8_01177	1301098.PKB_0563	9.97e-75	235.0	COG2932@1|root,COG3655@1|root,COG2932@2|Bacteria,COG3655@2|Bacteria,1PIRG@1224|Proteobacteria,1S499@1236|Gammaproteobacteria	1236|Gammaproteobacteria	K	transcriptional regulator	prtR_1	-	-	-	-	-	-	-	-	-	-	-	HTH_3,Peptidase_S24
PALA8_01183	1117958.PE143B_0130495	8.23e-81	250.0	COG3646@1|root,COG3646@2|Bacteria,1N6FR@1224|Proteobacteria,1SAAV@1236|Gammaproteobacteria	1236|Gammaproteobacteria	K	Phage regulatory protein Rha (Phage_pRha)	-	-	-	-	-	-	-	-	-	-	-	-	Phage_pRha
PALA8_01184	1388763.O165_005465	1.08e-25	97.1	2BTDA@1|root,32NJA@2|Bacteria,1QNN0@1224|Proteobacteria,1TM8J@1236|Gammaproteobacteria,1YZ8G@136845|Pseudomonas putida group	1236|Gammaproteobacteria	-	-	-	-	-	-	-	-	-	-	-	-	-	-	-
PALA8_01186	323097.Nham_3348	7.4e-67	219.0	COG3756@1|root,COG3756@2|Bacteria,1N667@1224|Proteobacteria,2UC3M@28211|Alphaproteobacteria	28211|Alphaproteobacteria	S	Protein of unknown function (DUF1376)	-	-	-	-	-	-	-	-	-	-	-	-	DUF1376
PALA8_01187	390235.PputW619_3956	4.65e-112	330.0	COG1484@1|root,COG1484@2|Bacteria,1RBGI@1224|Proteobacteria,1SYFK@1236|Gammaproteobacteria	1236|Gammaproteobacteria	L	DNA replication protein	-	-	-	ko:K02315	-	-	-	-	ko00000,ko03032	-	-	-	IstB_IS21
PALA8_01188	1117958.PE143B_0109730	1.28e-255	711.0	COG0305@1|root,COG0305@2|Bacteria,1MUG9@1224|Proteobacteria,1RPM2@1236|Gammaproteobacteria	1236|Gammaproteobacteria	L	it exhibits DNA-dependent ATPase activity and contains distinct active sites for ATP binding, DNA binding, and interaction with DnaC protein, primase, and other prepriming proteins	-	-	3.6.4.12	ko:K02314	ko03030,ko04112,map03030,map04112	-	-	-	ko00000,ko00001,ko01000,ko03032	-	-	-	DnaB,DnaB_C
PALA8_01189	1388763.O165_005495	1.2e-16	75.5	2AMSK@1|root,31CP1@2|Bacteria,1Q9BI@1224|Proteobacteria,1TM70@1236|Gammaproteobacteria,1YZ5S@136845|Pseudomonas putida group	1236|Gammaproteobacteria	-	-	-	-	-	-	-	-	-	-	-	-	-	-	-
PALA8_01190	216595.PFLU_2856	9.38e-40	140.0	29Z54@1|root,30M2U@2|Bacteria,1QRWA@1224|Proteobacteria,1RV3D@1236|Gammaproteobacteria,1YT87@136843|Pseudomonas fluorescens group	1236|Gammaproteobacteria	-	-	-	-	-	-	-	-	-	-	-	-	-	-	-
PALA8_01192	287.DR97_4247	9.36e-65	198.0	2DQAD@1|root,335M3@2|Bacteria,1QEHU@1224|Proteobacteria,1TB82@1236|Gammaproteobacteria,1YH34@136841|Pseudomonas aeruginosa group	1236|Gammaproteobacteria	S	Phage holin family (Lysis protein S)	-	-	-	-	-	-	-	-	-	-	-	-	Phage_holin_3_1
PALA8_01193	287.DR97_4248	3.85e-137	389.0	COG3179@1|root,COG3179@2|Bacteria,1RC1P@1224|Proteobacteria,1SAB1@1236|Gammaproteobacteria,1YGV3@136841|Pseudomonas aeruginosa group	1236|Gammaproteobacteria	S	Chitinase class I	-	-	-	ko:K03791	-	-	-	-	ko00000	-	GH19	-	Glyco_hydro_19
PALA8_01194	287.DR97_4249	2.56e-50	159.0	28QKG@1|root,2ZD29@2|Bacteria,1P5D0@1224|Proteobacteria,1SW13@1236|Gammaproteobacteria,1YKAK@136841|Pseudomonas aeruginosa group	1236|Gammaproteobacteria	-	-	-	-	-	-	-	-	-	-	-	-	-	-	-
PALA8_01196	287.DR97_4251	6.82e-170	475.0	2CTXP@1|root,32SUA@2|Bacteria,1N1VX@1224|Proteobacteria,1SA0X@1236|Gammaproteobacteria,1YFXR@136841|Pseudomonas aeruginosa group	1236|Gammaproteobacteria	-	-	-	-	-	-	-	-	-	-	-	-	-	-	-
PALA8_01197	1301098.PKB_5030	1.28e-75	231.0	COG4220@1|root,COG4220@2|Bacteria,1RFQ1@1224|Proteobacteria,1S33Z@1236|Gammaproteobacteria	1236|Gammaproteobacteria	L	DNA Packaging	nohB	-	-	ko:K22014	-	-	-	-	ko00000	-	-	-	Phage_Nu1
PALA8_01198	1301098.PKB_5029	2.47e-313	869.0	COG5525@1|root,COG5525@2|Bacteria,1MVS3@1224|Proteobacteria,1RRH5@1236|Gammaproteobacteria	1236|Gammaproteobacteria	S	Terminase	A	-	3.1.21.4	ko:K21512	-	-	-	-	ko00000,ko01000	-	-	-	Terminase_GpA
PALA8_01199	1301098.PKB_5028	3.11e-30	107.0	2EUF6@1|root,33MXG@2|Bacteria,1NN00@1224|Proteobacteria,1SJ6Q@1236|Gammaproteobacteria	1236|Gammaproteobacteria	-	-	-	-	-	-	-	-	-	-	-	-	-	-	-
PALA8_01200	1301098.PKB_5027	2.19e-263	733.0	COG5511@1|root,COG5511@2|Bacteria,1MVN4@1224|Proteobacteria,1RZ6N@1236|Gammaproteobacteria	1236|Gammaproteobacteria	S	Phage portal protein, lambda family	-	-	-	-	-	-	-	-	-	-	-	-	Phage_portal_2
PALA8_01201	1226994.AMZB01000059_gene3611	0.0	1062.0	COG3087@1|root,COG3087@2|Bacteria,1QU07@1224|Proteobacteria,1T1JT@1236|Gammaproteobacteria,1YGJV@136841|Pseudomonas aeruginosa group	1236|Gammaproteobacteria	D	Mu-like prophage major head subunit gpT	-	-	-	-	-	-	-	-	-	-	-	-	Mu-like_gpT
PALA8_01202	1301098.PKB_5025	4.56e-51	164.0	COG5471@1|root,COG5471@2|Bacteria,1NDRS@1224|Proteobacteria,1T11P@1236|Gammaproteobacteria	1236|Gammaproteobacteria	S	Uncharacterized conserved protein (DUF2190)	-	-	-	-	-	-	-	-	-	-	-	-	DUF2190
PALA8_01203	1226994.AMZB01000059_gene3613	2.43e-26	100.0	2ARTK@1|root,31H53@2|Bacteria,1QEU7@1224|Proteobacteria,1TC8Z@1236|Gammaproteobacteria,1YK2S@136841|Pseudomonas aeruginosa group	1236|Gammaproteobacteria	-	-	-	-	-	-	-	-	-	-	-	-	-	-	-
PALA8_01204	287.DR97_4259	3.83e-102	296.0	2A1EZ@1|root,30PN9@2|Bacteria,1QEFQ@1224|Proteobacteria,1TB4Z@1236|Gammaproteobacteria,1YGYZ@136841|Pseudomonas aeruginosa group	1236|Gammaproteobacteria	-	-	-	-	-	-	-	-	-	-	-	-	-	-	-
PALA8_01206	287.DR97_4261	1.44e-177	494.0	2D80K@1|root,32TQ4@2|Bacteria,1N4HE@1224|Proteobacteria,1TAAH@1236|Gammaproteobacteria,1YEZE@136841|Pseudomonas aeruginosa group	1236|Gammaproteobacteria	-	-	-	-	-	-	-	-	-	-	-	-	-	-	-
PALA8_01207	287.DR97_4262	5.93e-52	165.0	28Y0M@1|root,2ZJW9@2|Bacteria,1P5QY@1224|Proteobacteria,1STHV@1236|Gammaproteobacteria,1YKG8@136841|Pseudomonas aeruginosa group	1236|Gammaproteobacteria	-	-	-	-	-	-	-	-	-	-	-	-	-	-	-
PALA8_01208	287.DR97_4263	0.0	1451.0	COG0576@1|root,COG5281@1|root,COG0576@2|Bacteria,COG5281@2|Bacteria,1MX2R@1224|Proteobacteria,1S3MM@1236|Gammaproteobacteria,1YGRX@136841|Pseudomonas aeruginosa group	1236|Gammaproteobacteria	D	tape measure protein	Z012_10445	-	-	-	-	-	-	-	-	-	-	-	Phage_HK97_TLTM,Tape_meas_lam_C
PALA8_01209	287.DR97_4264	2.52e-124	353.0	2EKKI@1|root,33EAD@2|Bacteria,1NH4Q@1224|Proteobacteria,1SJG1@1236|Gammaproteobacteria,1YGVS@136841|Pseudomonas aeruginosa group	1236|Gammaproteobacteria	-	-	-	-	-	-	-	-	-	-	-	-	-	-	-
PALA8_01210	287.DR97_4265	0.0	1090.0	2EBVZ@1|root,335VC@2|Bacteria,1RHVC@1224|Proteobacteria,1SND1@1236|Gammaproteobacteria,1YD8D@136841|Pseudomonas aeruginosa group	1236|Gammaproteobacteria	-	-	-	-	-	-	-	-	-	-	-	-	-	-	-
PALA8_01211	287.DR97_4266	3.37e-68	209.0	2B3GW@1|root,31W5W@2|Bacteria,1QEJ7@1224|Proteobacteria,1TBAI@1236|Gammaproteobacteria,1YH5X@136841|Pseudomonas aeruginosa group	1236|Gammaproteobacteria	-	-	-	-	-	-	-	-	-	-	-	-	-	-	-
PALA8_01213	287.DR97_4267	1.63e-50	164.0	2CCDU@1|root,2ZIJA@2|Bacteria,1P687@1224|Proteobacteria,1SUU6@1236|Gammaproteobacteria,1YKA2@136841|Pseudomonas aeruginosa group	1236|Gammaproteobacteria	-	-	-	-	-	-	-	-	-	-	-	-	-	-	-
PALA8_01215	287.DR97_4269	2.25e-131	373.0	2EFJA@1|root,339BN@2|Bacteria,1NFD8@1224|Proteobacteria,1TATC@1236|Gammaproteobacteria,1YGI1@136841|Pseudomonas aeruginosa group	1236|Gammaproteobacteria	-	-	-	-	-	-	-	-	-	-	-	-	-	-	-
PALA8_01216	287.DR97_4270	4.7e-39	129.0	2AHCJ@1|root,317P9@2|Bacteria,1QEKA@1224|Proteobacteria,1TBBT@1236|Gammaproteobacteria,1YH7D@136841|Pseudomonas aeruginosa group	1236|Gammaproteobacteria	-	-	-	-	-	-	-	-	-	-	-	-	-	-	-
PALA8_01217	287.DR97_4271	5.81e-125	356.0	2CGE5@1|root,32S3S@2|Bacteria,1NY6N@1224|Proteobacteria,1SQMT@1236|Gammaproteobacteria,1YFX5@136841|Pseudomonas aeruginosa group	1236|Gammaproteobacteria	-	-	-	-	-	-	-	-	-	-	-	-	-	-	-
PALA8_01218	287.DR97_4272	4.7e-57	177.0	29W4P@1|root,30HPJ@2|Bacteria,1Q0GE@1224|Proteobacteria,1TBBP@1236|Gammaproteobacteria,1YH79@136841|Pseudomonas aeruginosa group	1236|Gammaproteobacteria	-	-	-	-	-	-	-	-	-	-	-	-	-	-	-
PALA8_01219	1288298.rosmuc_00464	3.38e-17	86.7	28JTG@1|root,2Z7PY@2|Bacteria,1QVNY@1224|Proteobacteria,2U7ED@28211|Alphaproteobacteria,46PQC@74030|Roseovarius	28211|Alphaproteobacteria	S	Protein of unknown function (DUF2793)	-	-	-	-	-	-	-	-	-	-	-	-	DUF2793
PALA8_01220	1288298.rosmuc_00463	3.57e-24	95.1	2E9B9@1|root,333J4@2|Bacteria,1N9FM@1224|Proteobacteria,2UGPB@28211|Alphaproteobacteria,46R7I@74030|Roseovarius	28211|Alphaproteobacteria	-	-	-	-	-	-	-	-	-	-	-	-	-	-	-
PALA8_01224	587753.EY04_17345	1.04e-142	412.0	28N2S@1|root,2ZB8K@2|Bacteria,1R9VY@1224|Proteobacteria,1S6X2@1236|Gammaproteobacteria	1236|Gammaproteobacteria	S	P63C domain	-	-	-	-	-	-	-	-	-	-	-	-	P63C
PALA8_01225	390235.PputW619_5169	3.88e-81	251.0	28PEU@1|root,2ZC6A@2|Bacteria,1RAPI@1224|Proteobacteria,1S8CS@1236|Gammaproteobacteria	1236|Gammaproteobacteria	-	-	-	-	-	-	-	-	-	-	-	-	-	-	-
PALA8_01326	754436.JCM19237_1308	3.64e-43	155.0	COG0714@1|root,COG0714@2|Bacteria,1NSN5@1224|Proteobacteria,1RPNN@1236|Gammaproteobacteria,1XW05@135623|Vibrionales	135623|Vibrionales	S	ATPase involved in DNA repair	-	-	-	-	-	-	-	-	-	-	-	-	AAA_5,DUF3686
PALA8_01541	1123020.AUIE01000015_gene880	1.6e-155	441.0	COG1116@1|root,COG1116@2|Bacteria,1N7FP@1224|Proteobacteria,1RXA2@1236|Gammaproteobacteria,1YIAT@136841|Pseudomonas aeruginosa group	1236|Gammaproteobacteria	P	ATPases associated with a variety of cellular activities	-	-	-	ko:K02049	-	M00188	-	-	ko00000,ko00002,ko02000	3.A.1.16,3.A.1.17	-	-	ABC_tran
PALA8_01542	1149133.ppKF707_5670	3.08e-193	541.0	COG0715@1|root,COG0715@2|Bacteria,1PQDD@1224|Proteobacteria,1TBWT@1236|Gammaproteobacteria,1YJDW@136841|Pseudomonas aeruginosa group	1236|Gammaproteobacteria	P	NMT1-like family	-	-	-	ko:K02051	-	M00188	-	-	ko00000,ko00002,ko02000	3.A.1.16,3.A.1.17	-	-	NMT1
PALA8_01543	1123020.AUIE01000015_gene882	2.52e-150	426.0	COG0600@1|root,COG0600@2|Bacteria,1MVAE@1224|Proteobacteria,1RXAP@1236|Gammaproteobacteria,1YK5H@136841|Pseudomonas aeruginosa group	1236|Gammaproteobacteria	P	Binding-protein-dependent transport system inner membrane component	-	-	-	ko:K02050	-	M00188	-	-	ko00000,ko00002,ko02000	3.A.1.16,3.A.1.17	-	-	BPD_transp_1
PALA8_01544	1245471.PCA10_15560	1.19e-157	444.0	COG1028@1|root,COG1028@2|Bacteria,1N3A2@1224|Proteobacteria,1RQRI@1236|Gammaproteobacteria,1YJ7I@136841|Pseudomonas aeruginosa group	1236|Gammaproteobacteria	IQ	KR domain	pldh-t	-	1.1.1.100	ko:K00059,ko:K10617	ko00061,ko00333,ko00622,ko00780,ko01040,ko01100,ko01120,ko01130,ko01212,ko01220,map00061,map00333,map00622,map00780,map01040,map01100,map01120,map01130,map01212,map01220	M00083,M00419,M00572	R04533,R04534,R04536,R04543,R04566,R04953,R04964,R05232,R07759,R07763,R10116,R10120,R11671	RC00029,RC00116,RC00117	ko00000,ko00001,ko00002,ko01000,ko01004	-	-	-	adh_short_C2
PALA8_01545	1123020.AUIE01000015_gene884	1.82e-128	364.0	COG0662@1|root,COG0662@2|Bacteria,1P536@1224|Proteobacteria,1RZT7@1236|Gammaproteobacteria,1YIPH@136841|Pseudomonas aeruginosa group	1236|Gammaproteobacteria	G	WxcM-like, C-terminal	-	-	-	-	-	-	-	-	-	-	-	-	Cupin_2
PALA8_01546	1123020.AUIE01000015_gene885	4.89e-184	514.0	COG0596@1|root,COG0596@2|Bacteria,1QXKK@1224|Proteobacteria,1T3EA@1236|Gammaproteobacteria,1YIPR@136841|Pseudomonas aeruginosa group	1236|Gammaproteobacteria	S	Serine hydrolase	-	-	-	-	-	-	-	-	-	-	-	-	Abhydrolase_1,Abhydrolase_6
PALA8_01547	1149133.ppKF707_5665	4.58e-167	470.0	COG1414@1|root,COG1414@2|Bacteria,1MYZS@1224|Proteobacteria,1RQAE@1236|Gammaproteobacteria,1YI4Z@136841|Pseudomonas aeruginosa group	1236|Gammaproteobacteria	K	helix_turn_helix isocitrate lyase regulation	pcaR	-	-	-	-	-	-	-	-	-	-	-	HTH_IclR,IclR
PALA8_01548	1245471.PCA10_15600	5.6e-162	456.0	COG1028@1|root,COG1028@2|Bacteria,1NBB6@1224|Proteobacteria,1RNGB@1236|Gammaproteobacteria,1YI1E@136841|Pseudomonas aeruginosa group	1236|Gammaproteobacteria	IQ	Fungal family of unknown function (DUF1776)	baiA2	-	-	-	-	-	-	-	-	-	-	-	adh_short,adh_short_C2
PALA8_01549	1123020.AUIE01000015_gene888	0.0	989.0	COG0028@1|root,COG0028@2|Bacteria,1MXG0@1224|Proteobacteria,1RPK8@1236|Gammaproteobacteria,1YIXH@136841|Pseudomonas aeruginosa group	1236|Gammaproteobacteria	EH	Thiamine pyrophosphate enzyme, N-terminal TPP binding domain	-	-	2.2.1.6	ko:K01652	ko00290,ko00650,ko00660,ko00770,ko01100,ko01110,ko01130,ko01210,ko01230,map00290,map00650,map00660,map00770,map01100,map01110,map01130,map01210,map01230	M00019,M00570	R00006,R00014,R00226,R03050,R04672,R04673,R08648	RC00027,RC00106,RC01192,RC02744,RC02893	ko00000,ko00001,ko00002,ko01000	-	-	-	TPP_enzyme_C,TPP_enzyme_M,TPP_enzyme_N
PALA8_01550	1245471.PCA10_15620	4.59e-162	457.0	COG1712@1|root,COG1712@2|Bacteria,1MX8S@1224|Proteobacteria,1RSE8@1236|Gammaproteobacteria,1YI83@136841|Pseudomonas aeruginosa group	1236|Gammaproteobacteria	H	Specifically catalyzes the NAD or NADP-dependent dehydrogenation of L-aspartate to iminoaspartate	nadX	-	1.4.1.21	ko:K06989	ko00760,ko01100,map00760,map01100	-	R07407,R07410	RC02566	ko00000,ko00001,ko01000	-	-	-	DUF108,NAD_binding_3
PALA8_01551	1123020.AUIE01000015_gene890	0.0	918.0	COG1012@1|root,COG1012@2|Bacteria,1MU1V@1224|Proteobacteria,1RMBQ@1236|Gammaproteobacteria,1YHIG@136841|Pseudomonas aeruginosa group	1236|Gammaproteobacteria	C	Aldehyde dehydrogenase family	-	-	1.2.1.8	ko:K00130	ko00260,ko01100,map00260,map01100	M00555	R02565,R02566	RC00080	ko00000,ko00001,ko00002,ko01000	-	-	-	Aldedh
PALA8_01552	1149133.ppKF707_5660	3.82e-229	631.0	COG0346@1|root,COG0346@2|Bacteria,1MVVU@1224|Proteobacteria,1RQQE@1236|Gammaproteobacteria,1YKM6@136841|Pseudomonas aeruginosa group	1236|Gammaproteobacteria	E	Glyoxalase/Bleomycin resistance protein/Dioxygenase superfamily	mcpII	-	-	-	-	-	-	-	-	-	-	-	Glyoxalase
PALA8_01553	1123020.AUIE01000015_gene892	2.75e-66	201.0	2CI53@1|root,32S7C@2|Bacteria,1RE39@1224|Proteobacteria	1224|Proteobacteria	-	-	-	-	-	-	-	-	-	-	-	-	-	-	-
PALA8_01554	1123020.AUIE01000015_gene893	8.27e-47	150.0	2DNN2@1|root,32Y7K@2|Bacteria,1N88D@1224|Proteobacteria,1TC96@1236|Gammaproteobacteria,1YK2Z@136841|Pseudomonas aeruginosa group	1236|Gammaproteobacteria	-	-	-	-	-	-	-	-	-	-	-	-	-	-	-
PALA8_01555	1245471.PCA10_15670	5.64e-256	700.0	COG4638@1|root,COG4638@2|Bacteria,1MV2G@1224|Proteobacteria,1RYCK@1236|Gammaproteobacteria,1YKIQ@136841|Pseudomonas aeruginosa group	1236|Gammaproteobacteria	P	Rieske [2Fe-2S] domain	carAa	-	-	-	-	-	-	-	-	-	-	-	Rieske
PALA8_01556	1123020.AUIE01000015_gene895	2.34e-81	243.0	COG0251@1|root,COG0251@2|Bacteria,1NBF3@1224|Proteobacteria	1224|Proteobacteria	J	Endoribonuclease L-PSP	-	-	-	-	-	-	-	-	-	-	-	-	Ribonuc_L-PSP
PALA8_01557	1123020.AUIE01000015_gene896	3.2e-199	555.0	COG1018@1|root,COG1018@2|Bacteria,1MU6E@1224|Proteobacteria,1RNA4@1236|Gammaproteobacteria,1YIB0@136841|Pseudomonas aeruginosa group	1236|Gammaproteobacteria	C	Oxidoreductase NAD-binding domain	-	-	1.1.1.404	ko:K21607	ko00361,ko01100,ko01120,map00361,map01100,map01120	-	R11585	-	ko00000,ko00001,ko01000	-	-	-	Fer2,NAD_binding_1
PALA8_01558	1123020.AUIE01000015_gene897	6.16e-253	698.0	COG3746@1|root,COG3746@2|Bacteria,1Q3GY@1224|Proteobacteria,1RNGT@1236|Gammaproteobacteria,1YI92@136841|Pseudomonas aeruginosa group	1236|Gammaproteobacteria	P	phosphate-selective porin O and P	-	-	-	-	-	-	-	-	-	-	-	-	-
PALA8_01567	745411.B3C1_14258	5.62e-118	347.0	2EDH7@1|root,337DA@2|Bacteria,1NE34@1224|Proteobacteria,1SI6K@1236|Gammaproteobacteria	1236|Gammaproteobacteria	S	Evidence 4 Homologs of previously reported genes of	-	-	-	-	-	-	-	-	-	-	-	-	-
PALA8_01568	1523503.JPMY01000035_gene3116	0.0	1396.0	COG1502@1|root,COG1502@2|Bacteria	2|Bacteria	I	Catalyzes the reversible phosphatidyl group transfer from one phosphatidylglycerol molecule to another to form cardiolipin (CL) (diphosphatidylglycerol) and glycerol	-	-	3.1.4.4	ko:K01115	ko00564,ko00565,ko01100,ko01110,ko04014,ko04024,ko04071,ko04072,ko04144,ko04666,ko04724,ko04912,ko05231,map00564,map00565,map01100,map01110,map04014,map04024,map04071,map04072,map04144,map04666,map04724,map04912,map05231	-	R01310,R02051,R07385	RC00017,RC00425	ko00000,ko00001,ko01000,ko04131	-	-	-	PLDc,PLDc_2
PALA8_01569	287.DR97_4636	0.0	1111.0	COG3501@1|root,COG3501@2|Bacteria,1MU7Q@1224|Proteobacteria,1RMZS@1236|Gammaproteobacteria,1YDXU@136841|Pseudomonas aeruginosa group	1236|Gammaproteobacteria	S	Phage late control gene D protein (GPD)	-	-	-	ko:K11904	ko03070,map03070	M00334	-	-	ko00000,ko00001,ko00002,ko02044	3.A.23.1	-	-	Phage_GPD
PALA8_01596	287.DR97_4461	3.38e-107	325.0	COG0189@1|root,COG0454@1|root,COG0189@2|Bacteria,COG0456@2|Bacteria,1MVN2@1224|Proteobacteria,1RS1C@1236|Gammaproteobacteria,1YEX6@136841|Pseudomonas aeruginosa group	1236|Gammaproteobacteria	HJK	RimK-like ATP-grasp domain	cphA	-	-	-	-	-	-	-	-	-	-	-	Acetyltransf_1,RimK
PALA8_01692	211586.SO_2224	8.8e-26	102.0	COG0454@1|root,COG0456@2|Bacteria,1N79D@1224|Proteobacteria,1SG34@1236|Gammaproteobacteria,2QC3U@267890|Shewanellaceae	1236|Gammaproteobacteria	K	Acetyltransferase (GNAT) domain	-	-	-	-	-	-	-	-	-	-	-	-	Acetyltransf_10
PALA8_01693	314264.ROS217_14591	1.29e-39	142.0	COG2850@1|root,COG2850@2|Bacteria,1NPD3@1224|Proteobacteria,2UX3E@28211|Alphaproteobacteria	28211|Alphaproteobacteria	S	Cupin superfamily protein	-	-	-	-	-	-	-	-	-	-	-	-	Cupin_4
PALA8_01694	314264.ROS217_14586	5.19e-132	391.0	COG0778@1|root,COG0778@2|Bacteria,1PUI1@1224|Proteobacteria,2U13C@28211|Alphaproteobacteria	28211|Alphaproteobacteria	C	Nitroreductase family	-	-	-	-	-	-	-	-	-	-	-	-	Nitroreductase
PALA8_01702	1294143.H681_12095	4.01e-88	266.0	28IHQ@1|root,2Z8IX@2|Bacteria,1PZJF@1224|Proteobacteria,1S1AH@1236|Gammaproteobacteria	1236|Gammaproteobacteria	S	Protein of unknown function (DUF3313)	-	-	-	-	-	-	-	-	-	-	-	-	DUF3313
PALA8_01703	287.DR97_4566	3.71e-62	192.0	2DNI1@1|root,32XMJ@2|Bacteria,1N0CA@1224|Proteobacteria,1SQ38@1236|Gammaproteobacteria	1236|Gammaproteobacteria	S	Fucose-binding lectin II (PA-IIL)	-	-	-	ko:K20277	ko02024,map02024	-	-	-	ko00000,ko00001	-	-	-	PA-IIL
PALA8_01728	287.DR97_4590	1.06e-96	288.0	COG0451@1|root,COG0451@2|Bacteria,1MVE4@1224|Proteobacteria,1RP2S@1236|Gammaproteobacteria,1YFP1@136841|Pseudomonas aeruginosa group	1236|Gammaproteobacteria	G	Catalyzes the interconversion between ADP-D-glycero- beta-D-manno-heptose and ADP-L-glycero-beta-D-manno-heptose via an epimerization at carbon 6 of the heptose	hldD	GO:0000166,GO:0000271,GO:0003674,GO:0003824,GO:0005488,GO:0005575,GO:0005622,GO:0005623,GO:0005737,GO:0005829,GO:0005975,GO:0005976,GO:0006629,GO:0008150,GO:0008152,GO:0008610,GO:0008653,GO:0008712,GO:0009058,GO:0009059,GO:0009103,GO:0009244,GO:0009311,GO:0009312,GO:0009987,GO:0016051,GO:0016853,GO:0016854,GO:0016857,GO:0033692,GO:0034637,GO:0034645,GO:0036094,GO:0043167,GO:0043168,GO:0043170,GO:…	5.1.3.20	ko:K03274	ko00540,ko01100,map00540,map01100	M00064	R05176	RC01291	ko00000,ko00001,ko00002,ko01000,ko01005	-	-	iPC815.YPO0058,iYL1228.KPN_03963	Epimerase
PALA8_01786	287.DR97_4650	0.0	879.0	COG3746@1|root,COG3746@2|Bacteria,1RG6T@1224|Proteobacteria,1S412@1236|Gammaproteobacteria,1YEHV@136841|Pseudomonas aeruginosa group	1236|Gammaproteobacteria	P	Phosphate-selective porin O and P	oprO	-	-	ko:K07221	-	-	-	-	ko00000,ko02000	1.B.5.1	-	-	Porin_O_P
PALA8_01847	287.DR97_4712	3.86e-150	422.0	COG1182@1|root,COG1182@2|Bacteria,1P59R@1224|Proteobacteria,1S337@1236|Gammaproteobacteria,1YFD5@136841|Pseudomonas aeruginosa group	1236|Gammaproteobacteria	C	Catalyzes the reductive cleavage of azo bond in aromatic azo compounds to the corresponding amines. Requires NADH, but not NADPH, as an electron donor for its activity	azoR	GO:0000166,GO:0003674,GO:0003824,GO:0005488,GO:0005575,GO:0005622,GO:0005623,GO:0005737,GO:0005829,GO:0006732,GO:0006950,GO:0006979,GO:0008081,GO:0008150,GO:0008152,GO:0008770,GO:0009058,GO:0009108,GO:0009987,GO:0010181,GO:0016491,GO:0016651,GO:0016655,GO:0016661,GO:0016787,GO:0016788,GO:0032553,GO:0036094,GO:0042578,GO:0043167,GO:0043168,GO:0044237,GO:0044249,GO:0044424,GO:0044444,GO:0044464,GO:…	-	ko:K01118	-	-	-	-	ko00000,ko01000	-	-	-	Flavodoxin_2
PALA8_01848	1332071.L581_3073	2.4e-91	276.0	COG3531@1|root,COG3531@2|Bacteria,1RIN9@1224|Proteobacteria,1RS8P@1236|Gammaproteobacteria,402N6@613|Serratia	1236|Gammaproteobacteria	O	Protein-disulfide isomerase	VP2116	-	-	ko:K07396	-	-	-	-	ko00000	-	-	-	DSBA,Thioredoxin_5
PALA8_01849	596153.Alide_2348	2.85e-39	135.0	COG0509@1|root,COG0509@2|Bacteria,1RGV7@1224|Proteobacteria,2VSD7@28216|Betaproteobacteria,4AEEN@80864|Comamonadaceae	28216|Betaproteobacteria	E	The glycine cleavage system catalyzes the degradation of glycine. The H protein shuttles the methylamine group of glycine from the P protein to the T protein	gcvH	-	-	ko:K02437	ko00260,ko00630,ko01100,ko01110,ko01130,ko01200,map00260,map00630,map01100,map01110,map01130,map01200	M00532	R01221	RC00022,RC02834	ko00000,ko00001,ko00002	-	-	-	GCV_H
PALA8_01850	1041138.KB890244_gene4968	1.36e-43	150.0	COG0702@1|root,COG0702@2|Bacteria,1MW44@1224|Proteobacteria,2TT9D@28211|Alphaproteobacteria,4BDCD@82115|Rhizobiaceae	28211|Alphaproteobacteria	GM	NmrA-like family	-	-	-	-	-	-	-	-	-	-	-	-	NAD_binding_10,NmrA
PALA8_01851	629265.PMA4326_19745	5.7e-91	272.0	COG0625@1|root,COG0625@2|Bacteria,1MY47@1224|Proteobacteria,1RRI3@1236|Gammaproteobacteria,1Z8GW@136849|Pseudomonas syringae group	1236|Gammaproteobacteria	H	Glutathione S-transferase	gst	GO:0000302,GO:0003674,GO:0003824,GO:0004364,GO:0005575,GO:0005622,GO:0005623,GO:0005737,GO:0006950,GO:0006979,GO:0008150,GO:0009636,GO:0010035,GO:0016740,GO:0016765,GO:0042221,GO:0042493,GO:0042542,GO:0044424,GO:0044464,GO:0046677,GO:0050896,GO:1901700	2.5.1.18	ko:K00799	ko00480,ko00980,ko00982,ko00983,ko01524,ko05200,ko05204,ko05225,ko05418,map00480,map00980,map00982,map00983,map01524,map05200,map05204,map05225,map05418	-	R03522,R07002,R07003,R07004,R07023,R07024,R07025,R07026,R07069,R07070,R07083,R07084,R07091,R07092,R07093,R07094,R07100,R07113,R07116,R08280,R09409,R11905	RC00004,RC00069,RC00840,RC00948,RC01704,RC01705,RC01706,RC01758,RC01759,RC01765,RC01767,RC01769,RC02243,RC02527,RC02939,RC02940,RC02942,RC02943,RC02944	ko00000,ko00001,ko01000,ko02000	1.A.12.2.2,1.A.12.3.2	-	-	GST_C,GST_C_3,GST_N,GST_N_2,GST_N_3
PALA8_01852	62928.azo3516	3.55e-93	276.0	COG0655@1|root,COG0655@2|Bacteria,1MW7N@1224|Proteobacteria,2VK49@28216|Betaproteobacteria,2KUFU@206389|Rhodocyclales	206389|Rhodocyclales	S	Flavodoxin domain	-	-	1.6.5.2	ko:K03809	ko00130,ko01110,map00130,map01110	-	R02964,R03643,R03816	RC00819	ko00000,ko00001,ko01000	-	-	-	FMN_red
PALA8_01853	214092.YPO0631	1.99e-149	429.0	COG0583@1|root,COG0583@2|Bacteria,1MUNN@1224|Proteobacteria,1SK0G@1236|Gammaproteobacteria,41HUM@629|Yersinia	1236|Gammaproteobacteria	K	LysR substrate binding domain	-	-	-	-	-	-	-	-	-	-	-	-	HTH_1,LysR_substrate
PALA8_01917	287.DR97_4776	1.44e-85	268.0	COG3765@1|root,COG3765@2|Bacteria,1PCII@1224|Proteobacteria,1SXKE@1236|Gammaproteobacteria,1YI7X@136841|Pseudomonas aeruginosa group	1236|Gammaproteobacteria	M	Chain length determinant protein	-	-	-	ko:K05789	-	-	-	-	ko00000,ko01005	-	-	-	Wzz
PALA8_01919	272844.PAB0772	6.04e-09	64.7	COG0463@1|root,arCOG01381@2157|Archaea,2XVM0@28890|Euryarchaeota,243JM@183968|Thermococci	183968|Thermococci	M	Glycosyltransferase like family 2	-	-	-	-	-	-	-	-	-	-	-	-	Glycos_transf_2
PALA8_01921	1206777.B195_20760	1.95e-213	593.0	COG1086@1|root,COG1086@2|Bacteria,1MWKY@1224|Proteobacteria,1RNQ2@1236|Gammaproteobacteria,1Z9A1@136849|Pseudomonas syringae group	1236|Gammaproteobacteria	GM	Polysaccharide biosynthesis protein C-terminal	fnlA	-	5.1.3.2	ko:K17716	ko00052,ko00520,ko01100,map00052,map00520,map01100	M00362	R00291	RC00289	ko00000,ko00001,ko00002,ko01000	-	-	-	Polysacc_syn_2C,Polysacc_synt_2
PALA8_01922	1109445.AGSX01000046_gene3580	1.76e-193	545.0	COG0451@1|root,COG1898@1|root,COG0451@2|Bacteria,COG1898@2|Bacteria,1MXGB@1224|Proteobacteria,1RSK7@1236|Gammaproteobacteria	1236|Gammaproteobacteria	GM	COG0451 Nucleoside-diphosphate-sugar epimerases	fnlB	-	1.1.1.367	ko:K19068	-	-	-	-	ko00000,ko01000	-	-	-	Epimerase
PALA8_01923	1109445.AGSX01000046_gene3581	2.13e-237	657.0	COG0381@1|root,COG0381@2|Bacteria,1MWZN@1224|Proteobacteria,1RPNC@1236|Gammaproteobacteria,1Z2HQ@136846|Pseudomonas stutzeri group	1236|Gammaproteobacteria	M	UDP-N-acetylglucosamine 2-epimerase	wecB	-	3.2.1.183,5.1.3.14	ko:K01791,ko:K08068	ko00520,ko01100,ko05111,map00520,map01100,map05111	M00362	R00420	RC00290	ko00000,ko00001,ko00002,ko01000,ko01005	-	-	-	Epimerase_2
PALA8_01924	1217648.F933_01889	2.46e-111	338.0	COG0438@1|root,COG0438@2|Bacteria,1RECM@1224|Proteobacteria,1S50C@1236|Gammaproteobacteria,3NT2F@468|Moraxellaceae	1236|Gammaproteobacteria	M	Glycosyl transferases group 1	wbjE	-	-	-	-	-	-	-	-	-	-	-	Glyco_trans_1_4,Glycos_transf_1
PALA8_01925	1265490.JHVY01000023_gene2237	5.6e-98	298.0	COG0451@1|root,COG0451@2|Bacteria,1MX2J@1224|Proteobacteria,1RPHW@1236|Gammaproteobacteria	1236|Gammaproteobacteria	M	epimerase dehydratase	galE	-	5.1.3.2	ko:K01784	ko00052,ko00520,ko01100,map00052,map00520,map01100	M00361,M00362,M00632	R00291,R02984	RC00289	ko00000,ko00001,ko00002,ko01000	-	-	-	Epimerase
PALA8_01926	1149133.ppKF707_3641	4.05e-159	455.0	COG0472@1|root,COG0472@2|Bacteria,1MWYW@1224|Proteobacteria,1RNAP@1236|Gammaproteobacteria,1YEF1@136841|Pseudomonas aeruginosa group	1236|Gammaproteobacteria	M	Glycosyl transferase family 4	wbpL	-	-	ko:K13007	-	-	-	-	ko00000,ko01000,ko01003,ko01005	-	-	-	Glycos_transf_4
PALA8_01970	287.DR97_4828	0.0	1170.0	COG1450@1|root,COG1450@2|Bacteria,1MUUA@1224|Proteobacteria,1RPJS@1236|Gammaproteobacteria,1YD4B@136841|Pseudomonas aeruginosa group	1236|Gammaproteobacteria	NU	Bacterial type II and III secretion system protein	gspD	-	-	ko:K02453	ko03070,ko05111,map03070,map05111	M00331	-	-	ko00000,ko00001,ko00002,ko02044	3.A.15	-	-	SPOR,Secretin,Secretin_N
PALA8_02004	287.DR97_4860	1e-92	279.0	COG0412@1|root,COG0412@2|Bacteria,1QTUP@1224|Proteobacteria,1SUU1@1236|Gammaproteobacteria,1YHC7@136841|Pseudomonas aeruginosa group	1236|Gammaproteobacteria	Q	Chlorophyllase	-	-	-	-	-	-	-	-	-	-	-	-	Chlorophyllase2
PALA8_02028	287.DR97_4887	4.53e-49	155.0	COG3130@1|root,COG3130@2|Bacteria,1N761@1224|Proteobacteria,1SCIC@1236|Gammaproteobacteria,1YGVK@136841|Pseudomonas aeruginosa group	1236|Gammaproteobacteria	J	During stationary phase, converts 70S ribosomes to an inactive dimeric form (100S ribosomes)	rmf	GO:0003674,GO:0003676,GO:0003723,GO:0005488,GO:0005575,GO:0005622,GO:0005623,GO:0005737,GO:0006412,GO:0006417,GO:0006518,GO:0006807,GO:0006950,GO:0008135,GO:0008150,GO:0008152,GO:0009058,GO:0009059,GO:0009889,GO:0009890,GO:0009892,GO:0009987,GO:0010467,GO:0010468,GO:0010556,GO:0010558,GO:0010605,GO:0010608,GO:0010629,GO:0017148,GO:0019222,GO:0019538,GO:0031323,GO:0031324,GO:0031326,GO:0031327,GO:…	-	ko:K03812	-	-	-	-	ko00000,ko03009	-	-	-	RMF
PALA8_02030	287.DR97_4889	8.53e-84	259.0	COG2027@1|root,COG2027@2|Bacteria,1MW40@1224|Proteobacteria,1RP8V@1236|Gammaproteobacteria,1YDSF@136841|Pseudomonas aeruginosa group	1236|Gammaproteobacteria	M	D-alanyl-D-alanine carboxypeptidase	dacB	-	3.4.16.4	ko:K07259	ko00550,map00550	-	-	-	ko00000,ko00001,ko01000,ko01002,ko01011	-	-	-	Peptidase_S13
PALA8_02249	287.DR97_5107	1.41e-214	593.0	COG0583@1|root,COG0583@2|Bacteria,1N663@1224|Proteobacteria,1RZH0@1236|Gammaproteobacteria,1YFBA@136841|Pseudomonas aeruginosa group	1236|Gammaproteobacteria	K	LysR substrate binding domain	yidZ	-	-	-	-	-	-	-	-	-	-	-	HTH_1,LysR_substrate
PALA8_02300	1218352.B597_018830	1.76e-192	543.0	COG0582@1|root,COG0582@2|Bacteria,1NWGS@1224|Proteobacteria,1S4PB@1236|Gammaproteobacteria,1Z3SI@136846|Pseudomonas stutzeri group	1236|Gammaproteobacteria	L	Belongs to the 'phage' integrase family	-	-	-	-	-	-	-	-	-	-	-	-	Phage_integrase
PALA8_02301	157783.LK03_13815	2.74e-37	127.0	2E3UI@1|root,32YRW@2|Bacteria,1N2S9@1224|Proteobacteria	1224|Proteobacteria	S	Pyocin activator protein PrtN	prtN	-	-	-	-	-	-	-	-	-	-	-	PyocinActivator
PALA8_02304	637390.AFOH01000040_gene2348	5.8e-189	551.0	COG0270@1|root,COG0270@2|Bacteria,1MV9D@1224|Proteobacteria,1RPD1@1236|Gammaproteobacteria	1236|Gammaproteobacteria	L	DNA methylase	-	-	2.1.1.37	ko:K00558	ko00270,ko01100,ko05206,map00270,map01100,map05206	M00035	R04858	RC00003,RC00332	ko00000,ko00001,ko00002,ko01000,ko02048,ko03032,ko03036	-	-	-	DNA_methylase
PALA8_02308	220664.PFL_1982	1.6e-36	126.0	2AS34@1|root,31HFT@2|Bacteria,1Q9KN@1224|Proteobacteria,1RVAD@1236|Gammaproteobacteria,1YTQZ@136843|Pseudomonas fluorescens group	1236|Gammaproteobacteria	K	Pyocin activator protein PrtN	-	-	-	-	-	-	-	-	-	-	-	-	PyocinActivator
PALA8_02310	1114970.PSF113_4320	2.6e-28	105.0	2AU3F@1|root,32M29@2|Bacteria,1QS4Q@1224|Proteobacteria,1RVG9@1236|Gammaproteobacteria,1YTYT@136843|Pseudomonas fluorescens group	1236|Gammaproteobacteria	L	Phage antirepressor protein KilAC domain	-	-	-	-	-	-	-	-	-	-	-	-	ANT
PALA8_02313	287.DR97_3580	1.82e-79	246.0	COG2932@1|root,COG3655@1|root,COG2932@2|Bacteria,COG3655@2|Bacteria,1PIRG@1224|Proteobacteria,1S499@1236|Gammaproteobacteria,1YJA5@136841|Pseudomonas aeruginosa group	1236|Gammaproteobacteria	K	Cro/C1-type HTH DNA-binding domain	prtR_1	-	-	-	-	-	-	-	-	-	-	-	HTH_3,Peptidase_S24
PALA8_02315	1357272.AVEO02000111_gene3538	1.08e-12	67.8	2DP9I@1|root,3314Q@2|Bacteria,1N6P4@1224|Proteobacteria,1SD72@1236|Gammaproteobacteria	1236|Gammaproteobacteria	-	-	-	-	-	-	-	-	-	-	-	-	-	-	-
PALA8_02316	1470593.BW43_04179	4.43e-11	62.4	2DP9I@1|root,3314Q@2|Bacteria,1N6P4@1224|Proteobacteria,1SD72@1236|Gammaproteobacteria	1236|Gammaproteobacteria	-	-	-	-	-	-	-	-	-	-	-	-	-	-	-
PALA8_02317	287.DR97_3582	4.01e-22	87.4	COG1734@1|root,COG1734@2|Bacteria,1NGS3@1224|Proteobacteria,1SGUS@1236|Gammaproteobacteria,1YKG0@136841|Pseudomonas aeruginosa group	1236|Gammaproteobacteria	T	Prokaryotic dksA/traR C4-type zinc finger	-	-	-	-	-	-	-	-	-	-	-	-	zf-dskA_traR
PALA8_02318	220664.PFL_1989	1e-156	465.0	COG4643@1|root,COG5545@1|root,COG4643@2|Bacteria,COG5545@2|Bacteria,1MVGK@1224|Proteobacteria,1S6W2@1236|Gammaproteobacteria,1YSKX@136843|Pseudomonas fluorescens group	1236|Gammaproteobacteria	S	Virulence-associated protein E	-	-	-	ko:K06919	-	-	-	-	ko00000	-	-	-	Prim-Pol,Toprim_3,Toprim_4,VirE
PALA8_02321	1437882.AZRU01000006_gene1546	0.0	1662.0	COG4733@1|root,COG4733@2|Bacteria,1PHV3@1224|Proteobacteria,1TCGF@1236|Gammaproteobacteria,1YKAZ@136841|Pseudomonas aeruginosa group	1236|Gammaproteobacteria	S	Domain of unknown function (DUF1983)	-	-	-	-	-	-	-	-	-	-	-	-	DUF1983
PALA8_02323	69328.PVLB_09215	1.9e-41	147.0	2B2R8@1|root,31VBA@2|Bacteria,1NBGB@1224|Proteobacteria,1S888@1236|Gammaproteobacteria	1236|Gammaproteobacteria	-	-	-	-	-	-	-	-	-	-	-	-	-	-	Peptidase_S74
PALA8_02324	287.DR97_5419	8.4e-143	403.0	COG3179@1|root,COG3179@2|Bacteria,1RC1P@1224|Proteobacteria,1SAB1@1236|Gammaproteobacteria,1YGV3@136841|Pseudomonas aeruginosa group	1236|Gammaproteobacteria	S	Chitinase class I	-	-	-	ko:K03791	-	-	-	-	ko00000	-	GH19	-	Glyco_hydro_19
PALA8_02325	287.DR97_5420	1.09e-55	176.0	2BYHF@1|root,32VUY@2|Bacteria,1MZB9@1224|Proteobacteria,1SC48@1236|Gammaproteobacteria,1YK39@136841|Pseudomonas aeruginosa group	1236|Gammaproteobacteria	-	-	-	-	-	-	-	-	-	-	-	-	-	-	-
PALA8_02326	287.DR97_5421	2.53e-47	152.0	2EREF@1|root,33IZZ@2|Bacteria,1NNK6@1224|Proteobacteria,1SEZF@1236|Gammaproteobacteria,1YK3Y@136841|Pseudomonas aeruginosa group	1236|Gammaproteobacteria	-	-	-	-	-	-	-	-	-	-	-	-	-	-	-
PALA8_02327	287.DR97_5422	1.02e-55	173.0	2AHCW@1|root,317PT@2|Bacteria,1QEKF@1224|Proteobacteria,1TBBY@1236|Gammaproteobacteria,1YH7P@136841|Pseudomonas aeruginosa group	1236|Gammaproteobacteria	-	-	-	-	-	-	-	-	-	-	-	-	-	-	-
PALA8_02356	287.DR97_5176	5.59e-26	96.3	2BGRF@1|root,32AQI@2|Bacteria,1QF5Q@1224|Proteobacteria,1TC8U@1236|Gammaproteobacteria,1YK2I@136841|Pseudomonas aeruginosa group	1236|Gammaproteobacteria	-	-	-	-	-	-	-	-	-	-	-	-	-	-	-
PALA8_02358	95619.PM1_0218390	7.34e-148	422.0	COG2503@1|root,COG2503@2|Bacteria,1RB4N@1224|Proteobacteria,1RY2I@1236|Gammaproteobacteria	1236|Gammaproteobacteria	S	Acid phosphatase	hel	GO:0005575,GO:0005623,GO:0009279,GO:0016020,GO:0019867,GO:0030312,GO:0030313,GO:0031975,GO:0044462,GO:0044464,GO:0071944	-	-	-	-	-	-	-	-	-	-	Acid_phosphat_B
PALA8_02407	287.DR97_1161	8.03e-182	506.0	COG2801@1|root,COG2801@2|Bacteria,1MVXQ@1224|Proteobacteria,1RPEW@1236|Gammaproteobacteria,1YJPN@136841|Pseudomonas aeruginosa group	1236|Gammaproteobacteria	L	HTH-like domain	-	-	-	ko:K07497	-	-	-	-	ko00000	-	-	-	HTH_21,rve
PALA8_02408	287.DR97_5229	4.83e-61	188.0	COG2963@1|root,COG2963@2|Bacteria,1N04F@1224|Proteobacteria,1S6GJ@1236|Gammaproteobacteria,1YJTK@136841|Pseudomonas aeruginosa group	1236|Gammaproteobacteria	L	Transposase	-	-	-	ko:K07483	-	-	-	-	ko00000	-	-	-	HTH_Tnp_1
PALA8_02409	930171.Asphe3_10140	3.21e-93	311.0	COG0433@1|root,COG0433@2|Bacteria	2|Bacteria	S	helicase activity	-	-	-	ko:K12206,ko:K12217,ko:K19175	-	-	-	-	ko00000,ko02044,ko02048	3.A.7.10.1,3.A.7.9.1	-	-	AAA_10,DUF87,TrwB_AAD_bind
PALA8_02410	1212548.B381_01614	0.0	1311.0	COG0433@1|root,COG0433@2|Bacteria,1NRBN@1224|Proteobacteria,1RU1X@1236|Gammaproteobacteria	1236|Gammaproteobacteria	D	sigma factors are initiation factors that promote the attachment of RNA polymerase to specific initiation sites and are then released	-	-	-	ko:K19175	-	-	-	-	ko00000,ko02048	-	-	-	AAA_10,DUF87,FtsK_SpoIIIE,TrwB_AAD_bind
PALA8_02411	287.DR97_5229	1.68e-61	189.0	COG2963@1|root,COG2963@2|Bacteria,1N04F@1224|Proteobacteria,1S6GJ@1236|Gammaproteobacteria,1YJTK@136841|Pseudomonas aeruginosa group	1236|Gammaproteobacteria	L	Transposase	-	-	-	ko:K07483	-	-	-	-	ko00000	-	-	-	HTH_Tnp_1
PALA8_02412	287.DR97_5228	4.03e-200	553.0	COG2801@1|root,COG2801@2|Bacteria,1MVXQ@1224|Proteobacteria,1RPEW@1236|Gammaproteobacteria,1YJPN@136841|Pseudomonas aeruginosa group	1236|Gammaproteobacteria	L	HTH-like domain	-	-	-	ko:K07497	-	-	-	-	ko00000	-	-	-	HTH_21,rve
PALA8_02413	1212548.B381_01614	1.14e-316	919.0	COG0433@1|root,COG0433@2|Bacteria,1NRBN@1224|Proteobacteria,1RU1X@1236|Gammaproteobacteria	1236|Gammaproteobacteria	D	sigma factors are initiation factors that promote the attachment of RNA polymerase to specific initiation sites and are then released	-	-	-	ko:K19175	-	-	-	-	ko00000,ko02048	-	-	-	AAA_10,DUF87,FtsK_SpoIIIE,TrwB_AAD_bind
PALA8_02414	1212548.B381_01609	0.0	945.0	2CHAQ@1|root,2Z7XY@2|Bacteria,1R8RY@1224|Proteobacteria	1224|Proteobacteria	-	-	-	-	-	-	-	-	-	-	-	-	-	-	-
PALA8_02415	1212548.B381_01604	0.0	879.0	28HWN@1|root,2Z82J@2|Bacteria,1MXM3@1224|Proteobacteria	1224|Proteobacteria	-	-	-	-	-	-	-	-	-	-	-	-	-	-	-
PALA8_02416	1212548.B381_01604	2.12e-81	261.0	28HWN@1|root,2Z82J@2|Bacteria,1MXM3@1224|Proteobacteria	1224|Proteobacteria	-	-	-	-	-	-	-	-	-	-	-	-	-	-	-
PALA8_02417	1212548.B381_01599	1.47e-283	781.0	COG0270@1|root,COG0270@2|Bacteria,1MV9H@1224|Proteobacteria,1RYG6@1236|Gammaproteobacteria,1Z3N3@136846|Pseudomonas stutzeri group	1236|Gammaproteobacteria	H	Belongs to the class I-like SAM-binding methyltransferase superfamily. C5-methyltransferase family	-	-	2.1.1.37	ko:K00558	ko00270,ko01100,ko05206,map00270,map01100,map05206	M00035	R04858	RC00003,RC00332	ko00000,ko00001,ko00002,ko01000,ko02048,ko03032,ko03036	-	-	-	DNA_methylase
PALA8_02418	1001585.MDS_2778	0.0	1021.0	COG0507@1|root,COG3410@1|root,COG0507@2|Bacteria,COG3410@2|Bacteria,1R703@1224|Proteobacteria,1RY5E@1236|Gammaproteobacteria,1YF9D@136841|Pseudomonas aeruginosa group	1236|Gammaproteobacteria	L	Uncharacterized conserved protein (DUF2075)	-	-	-	ko:K09384	-	-	-	-	ko00000	-	-	-	DUF2075
PALA8_02429	1206777.B195_17804	2.04e-61	194.0	COG1595@1|root,COG1595@2|Bacteria,1RFU3@1224|Proteobacteria,1RY4W@1236|Gammaproteobacteria,1Z81H@136849|Pseudomonas syringae group	1236|Gammaproteobacteria	K	Belongs to the sigma-70 factor family. ECF subfamily	fecI	-	-	ko:K03088	-	-	-	-	ko00000,ko03021	-	-	-	Sigma70_r2,Sigma70_r4_2
PALA8_02430	1206777.B195_17809	1.05e-124	366.0	COG3712@1|root,COG3712@2|Bacteria,1N28G@1224|Proteobacteria,1RR9M@1236|Gammaproteobacteria,1ZAM5@136849|Pseudomonas syringae group	1236|Gammaproteobacteria	PT	Domain of unknown function (DUF4880)	fecR	-	-	ko:K07165	-	-	-	-	ko00000	-	-	-	DUF4880,FecR
PALA8_02473	95619.PM1_0214025	3.72e-119	348.0	COG2267@1|root,COG2267@2|Bacteria,1NK3M@1224|Proteobacteria,1S33V@1236|Gammaproteobacteria	1236|Gammaproteobacteria	I	Alpha beta hydrolase	-	-	-	-	-	-	-	-	-	-	-	-	Abhydrolase_1,Abhydrolase_6
PALA8_02474	1294143.H681_14440	2.48e-145	419.0	COG4977@1|root,COG4977@2|Bacteria,1R9N5@1224|Proteobacteria,1S1V4@1236|Gammaproteobacteria	1236|Gammaproteobacteria	K	COG4977 Transcriptional regulator containing an amidase domain and an AraC-type DNA-binding HTH domain	-	-	-	-	-	-	-	-	-	-	-	-	DJ-1_PfpI,HTH_18
PALA8_02552	287.DR97_5424	0.0	1032.0	COG0607@1|root,COG2897@1|root,COG0607@2|Bacteria,COG2897@2|Bacteria,1MU3V@1224|Proteobacteria,1RQD0@1236|Gammaproteobacteria	1236|Gammaproteobacteria	P	sulfurtransferase	-	-	-	-	-	-	-	-	-	-	-	-	Rhodanese
PALA8_02553	287.DR97_5425	1.08e-56	180.0	COG5553@1|root,COG5553@2|Bacteria,1R5RR@1224|Proteobacteria,1TBW9@1236|Gammaproteobacteria,1YJAN@136841|Pseudomonas aeruginosa group	1236|Gammaproteobacteria	S	Cysteine dioxygenase type I	-	-	-	-	-	-	-	-	-	-	-	-	CDO_I
PALA8_02555	287.DR97_5426	2.08e-210	582.0	COG0583@1|root,COG0583@2|Bacteria,1R55T@1224|Proteobacteria,1S0QZ@1236|Gammaproteobacteria,1YHPM@136841|Pseudomonas aeruginosa group	1236|Gammaproteobacteria	K	LysR substrate binding domain	-	-	-	-	-	-	-	-	-	-	-	-	HTH_1,LysR_substrate
PALA8_02556	287.DR97_5427	2.5e-257	706.0	COG2141@1|root,COG2141@2|Bacteria,1MX4E@1224|Proteobacteria,1SMKU@1236|Gammaproteobacteria,1YI66@136841|Pseudomonas aeruginosa group	1236|Gammaproteobacteria	C	Luciferase-like monooxygenase	-	-	1.14.14.5	ko:K04091	ko00920,map00920	-	R07210,R10206	RC01779,RC02556	ko00000,ko00001,ko01000	-	-	-	Bac_luciferase
PALA8_02557	287.DR97_5428	9.29e-222	612.0	COG0715@1|root,COG0715@2|Bacteria,1R0VR@1224|Proteobacteria,1RRGQ@1236|Gammaproteobacteria,1YI87@136841|Pseudomonas aeruginosa group	1236|Gammaproteobacteria	P	ABC transporter, phosphonate, periplasmic substrate-binding protein	-	-	-	ko:K02051	-	M00188	-	-	ko00000,ko00002,ko02000	3.A.1.16,3.A.1.17	-	-	NMT1
PALA8_02558	287.DR97_5429	1.24e-256	704.0	COG2141@1|root,COG2141@2|Bacteria,1MX4E@1224|Proteobacteria,1RTKR@1236|Gammaproteobacteria,1YKRV@136841|Pseudomonas aeruginosa group	1236|Gammaproteobacteria	C	Luciferase-like monooxygenase	ssuD_2	-	1.14.14.5	ko:K04091	ko00920,map00920	-	R07210,R10206	RC01779,RC02556	ko00000,ko00001,ko01000	-	-	-	Bac_luciferase
PALA8_02559	287.DR97_5430	5.88e-278	759.0	COG1960@1|root,COG1960@2|Bacteria,1MW97@1224|Proteobacteria	1224|Proteobacteria	I	acyl-CoA dehydrogenase	-	-	-	-	-	-	-	-	-	-	-	-	Acyl-CoA_dh_1,Acyl-CoA_dh_2,Acyl-CoA_dh_M,Acyl-CoA_dh_N
PALA8_02560	287.DR97_5431	1.81e-226	625.0	COG0715@1|root,COG0715@2|Bacteria,1MV9S@1224|Proteobacteria,1RS9C@1236|Gammaproteobacteria	1236|Gammaproteobacteria	P	(ABC) transporter	-	-	-	ko:K15553	ko00920,ko02010,map00920,map02010	M00436	-	-	ko00000,ko00001,ko00002,ko02000	3.A.1.17.2	-	-	NMT1
PALA8_02561	287.DR97_5432	6.28e-222	612.0	COG0715@1|root,COG0715@2|Bacteria,1MV9S@1224|Proteobacteria,1RS9C@1236|Gammaproteobacteria	1236|Gammaproteobacteria	P	(ABC) transporter	-	-	-	ko:K15553	ko00920,ko02010,map00920,map02010	M00436	-	-	ko00000,ko00001,ko00002,ko02000	3.A.1.17.2	-	-	NMT1
PALA8_02562	287.DR97_5433	3.51e-224	618.0	COG0715@1|root,COG0715@2|Bacteria,1MV9S@1224|Proteobacteria,1S0U9@1236|Gammaproteobacteria,1YDY6@136841|Pseudomonas aeruginosa group	1236|Gammaproteobacteria	P	ABC transporter	-	-	-	ko:K15553	ko00920,ko02010,map00920,map02010	M00436	-	-	ko00000,ko00001,ko00002,ko02000	3.A.1.17.2	-	-	NMT1
PALA8_02596	1156919.QWC_17272	6.48e-32	117.0	COG2427@1|root,COG2427@2|Bacteria,1NBU2@1224|Proteobacteria,2VVC8@28216|Betaproteobacteria,3T8B8@506|Alcaligenaceae	28216|Betaproteobacteria	S	Protein of unknown function (DUF1641)	-	-	-	-	-	-	-	-	-	-	-	-	DUF1641
PALA8_02599	587753.EY04_17015	4.94e-58	184.0	COG5455@1|root,COG5455@2|Bacteria,1RF2G@1224|Proteobacteria,1T0WE@1236|Gammaproteobacteria	1236|Gammaproteobacteria	S	response to cobalt ion	cigR	-	-	-	-	-	-	-	-	-	-	-	RcnB
PALA8_02703	1439940.BAY1663_02897	2.57e-169	519.0	COG3210@1|root,COG3210@2|Bacteria,1MX2K@1224|Proteobacteria,1RNRK@1236|Gammaproteobacteria	1236|Gammaproteobacteria	U	Large exoproteins involved in heme utilization or adhesion	-	-	-	ko:K15125	ko05133,map05133	-	-	-	ko00000,ko00001,ko00536	-	-	-	DUF637,Fil_haemagg,Fil_haemagg_2,Haemagg_act
PALA8_02704	287.DR97_5974	3.74e-137	480.0	COG3210@1|root,COG3210@2|Bacteria,1MX2K@1224|Proteobacteria,1RNRK@1236|Gammaproteobacteria,1YD8T@136841|Pseudomonas aeruginosa group	1236|Gammaproteobacteria	U	haemagglutination activity domain	-	-	-	ko:K15125	ko05133,map05133	-	-	-	ko00000,ko00001,ko00536	-	-	-	DUF637,Fil_haemagg,Fil_haemagg_2,Haemagg_act
PALA8_02705	287.DR97_5974	0.0	3145.0	COG3210@1|root,COG3210@2|Bacteria,1MX2K@1224|Proteobacteria,1RNRK@1236|Gammaproteobacteria,1YD8T@136841|Pseudomonas aeruginosa group	1236|Gammaproteobacteria	U	haemagglutination activity domain	-	-	-	ko:K15125	ko05133,map05133	-	-	-	ko00000,ko00001,ko00536	-	-	-	DUF637,Fil_haemagg,Fil_haemagg_2,Haemagg_act
PALA8_02708	1453503.AU05_20240	1.01e-90	279.0	COG3209@1|root,COG3209@2|Bacteria,1N632@1224|Proteobacteria,1SS79@1236|Gammaproteobacteria,1YGN8@136841|Pseudomonas aeruginosa group	1236|Gammaproteobacteria	M	COG3209 Rhs family protein	-	-	-	-	-	-	-	-	-	-	-	-	RHS_repeat
PALA8_02724	287.DR97_5992	1.83e-209	581.0	COG0726@1|root,COG0726@2|Bacteria	2|Bacteria	G	polysaccharide deacetylase	-	-	-	-	-	-	-	-	-	-	-	-	Polysacc_deac_1
PALA8_02766	287.DR97_6034	0.0	1520.0	COG4774@1|root,COG4774@2|Bacteria,1MV0X@1224|Proteobacteria,1T1GW@1236|Gammaproteobacteria,1YE6N@136841|Pseudomonas aeruginosa group	1236|Gammaproteobacteria	P	Secretin and TonB N terminus short domain	-	-	-	ko:K02014	-	-	-	-	ko00000,ko02000	1.B.14	-	-	Plug,STN,TonB_dep_Rec
PALA8_02791	287.DR97_6059	0.0	1052.0	COG3501@1|root,COG3501@2|Bacteria,1MU7Q@1224|Proteobacteria,1RMZS@1236|Gammaproteobacteria,1YFD4@136841|Pseudomonas aeruginosa group	1236|Gammaproteobacteria	S	Gp5 C-terminal repeat (3 copies)	vgrG	-	-	ko:K11904	ko03070,map03070	M00334	-	-	ko00000,ko00001,ko00002,ko02044	3.A.23.1	-	-	Gp5_C,Phage_GPD
PALA8_02792	1005395.CSV86_19430	2.97e-118	353.0	2C93F@1|root,2ZVGC@2|Bacteria,1P6MB@1224|Proteobacteria,1SUUR@1236|Gammaproteobacteria	1236|Gammaproteobacteria	-	-	-	-	-	-	-	-	-	-	-	-	-	-	-
PALA8_02794	287.DR97_6061	0.0	1578.0	COG0542@1|root,COG0542@2|Bacteria,1MVBH@1224|Proteobacteria,1RMZH@1236|Gammaproteobacteria,1YDH5@136841|Pseudomonas aeruginosa group	1236|Gammaproteobacteria	O	Clp amino terminal domain, pathogenicity island component	-	-	-	ko:K11907	ko02025,ko03070,map02025,map03070	M00334	-	-	ko00000,ko00001,ko00002,ko02044	3.A.23.1	-	-	AAA,AAA_2,ClpB_D2-small,Clp_N
PALA8_02795	287.DR97_6062	5.68e-235	647.0	COG3520@1|root,COG3520@2|Bacteria,1MWVS@1224|Proteobacteria,1RQD5@1236|Gammaproteobacteria,1YEH8@136841|Pseudomonas aeruginosa group	1236|Gammaproteobacteria	S	Type VI secretion, TssG	-	-	-	ko:K11895	ko02025,map02025	M00334	-	-	ko00000,ko00001,ko00002,ko02044	3.A.23.1	-	-	T6SS_TssG
PALA8_02796	287.DR97_6063	2.87e-133	393.0	COG3519@1|root,COG3519@2|Bacteria,1MUY4@1224|Proteobacteria,1RPK4@1236|Gammaproteobacteria,1YDPC@136841|Pseudomonas aeruginosa group	1236|Gammaproteobacteria	S	Type VI secretion system, TssF	-	-	-	ko:K11896	-	M00334	-	-	ko00000,ko00002,ko02044	3.A.23.1	-	-	T6SS_TssF
PALA8_02797	287.DR97_6032	0.0	9197.0	COG1020@1|root,COG1020@2|Bacteria,1QK4F@1224|Proteobacteria,1RPAG@1236|Gammaproteobacteria,1YFH6@136841|Pseudomonas aeruginosa group	1236|Gammaproteobacteria	Q	AA-adenyl-dom amino acid adenylation domain protein	pvdJ	-	-	ko:K12239,ko:K12240	ko01053,map01053	-	-	-	ko00000,ko00001,ko01008	-	-	-	AMP-binding,AMP-binding_C,Condensation,PP-binding,TauD,Thioesterase
PALA8_02798	287.DR97_6033	1.98e-231	637.0	COG0657@1|root,COG0657@2|Bacteria,1NEXK@1224|Proteobacteria,1RNNH@1236|Gammaproteobacteria,1YFVX@136841|Pseudomonas aeruginosa group	1236|Gammaproteobacteria	I	alpha/beta hydrolase fold	-	-	-	ko:K01066	-	-	-	-	ko00000,ko01000	-	-	-	Abhydrolase_3
PALA8_02799	287.DR97_6034	0.0	1520.0	COG4774@1|root,COG4774@2|Bacteria,1MV0X@1224|Proteobacteria,1T1GW@1236|Gammaproteobacteria,1YE6N@136841|Pseudomonas aeruginosa group	1236|Gammaproteobacteria	P	Secretin and TonB N terminus short domain	-	-	-	ko:K02014	-	-	-	-	ko00000,ko02000	1.B.14	-	-	Plug,STN,TonB_dep_Rec
PALA8_02800	287.DR97_6035	0.0	1046.0	COG4615@1|root,COG4615@2|Bacteria,1MVIC@1224|Proteobacteria,1RMYK@1236|Gammaproteobacteria,1YEM6@136841|Pseudomonas aeruginosa group	1236|Gammaproteobacteria	V	ATPases associated with a variety of cellular activities	pvdE	-	-	ko:K06160	ko02010,map02010	-	-	-	ko00000,ko00001,ko02000	3.A.1.113.2	-	-	ABC_membrane,ABC_tran
PALA8_02801	287.DR97_6036	3.82e-201	557.0	COG0299@1|root,COG0299@2|Bacteria,1QDP4@1224|Proteobacteria,1ST58@1236|Gammaproteobacteria	1236|Gammaproteobacteria	F	N(5)-hydroxyornithine transformylase PvdF	-	-	-	-	-	-	-	-	-	-	-	-	Formyl_trans_N
PALA8_02802	287.DR97_6037	4.26e-221	607.0	COG1262@1|root,COG1262@2|Bacteria,1NQ5K@1224|Proteobacteria,1S6X1@1236|Gammaproteobacteria,1YKP1@136841|Pseudomonas aeruginosa group	1236|Gammaproteobacteria	S	Sulfatase-modifying factor enzyme 1	pvdO	-	-	-	-	-	-	-	-	-	-	-	FGE-sulfatase,Peptidase_C14
PALA8_02803	287.DR97_6038	2.39e-313	853.0	COG0520@1|root,COG0520@2|Bacteria,1R4SM@1224|Proteobacteria,1RQR6@1236|Gammaproteobacteria,1YIFB@136841|Pseudomonas aeruginosa group	1236|Gammaproteobacteria	E	Aminotransferase class-V	pvdN	-	5.1.1.17	ko:K04127	ko00311,ko01100,ko01130,map00311,map01100,map01130	M00673	R04147	RC00302	ko00000,ko00001,ko00002,ko01000	-	-	-	Aminotran_5
PALA8_02804	287.DR97_6039	0.0	899.0	COG2355@1|root,COG2355@2|Bacteria,1MWEW@1224|Proteobacteria,1S4IM@1236|Gammaproteobacteria,1YGEU@136841|Pseudomonas aeruginosa group	1236|Gammaproteobacteria	E	Membrane dipeptidase (Peptidase family M19)	pvdM	-	3.4.13.19	ko:K01273	-	-	-	-	ko00000,ko00537,ko01000,ko01002,ko04147	-	-	-	Peptidase_M19
PALA8_02805	287.DR97_6040	0.0	1147.0	28KG6@1|root,2ZA22@2|Bacteria,1N1KV@1224|Proteobacteria,1SJRQ@1236|Gammaproteobacteria,1YHK8@136841|Pseudomonas aeruginosa group	1236|Gammaproteobacteria	S	PvdJ PvdD PvdP-like protein	pvdP	-	-	-	-	-	-	-	-	-	-	-	-
PALA8_02806	287.DR97_6041	0.0	875.0	COG1538@1|root,COG1538@2|Bacteria,1MUA8@1224|Proteobacteria,1RMDA@1236|Gammaproteobacteria,1YESS@136841|Pseudomonas aeruginosa group	1236|Gammaproteobacteria	M	Outer membrane efflux protein	opmQ	-	-	-	-	-	-	-	-	-	-	-	OEP
PALA8_02807	287.DR97_6042	0.0	1258.0	COG0577@1|root,COG1136@1|root,COG0577@2|Bacteria,COG1136@2|Bacteria,1MU45@1224|Proteobacteria,1RNUJ@1236|Gammaproteobacteria,1YFES@136841|Pseudomonas aeruginosa group	1236|Gammaproteobacteria	V	Part of the tripartite efflux system MacAB-TolC. MacB is a non-canonical ABC transporter that contains transmembrane domains (TMD), which form a pore in the inner membrane, and an ATP-binding domain (NBD), which is responsible for energy generation. Confers resistance against macrolides	macB	GO:0005575,GO:0005623,GO:0005886,GO:0005887,GO:0006810,GO:0008150,GO:0015893,GO:0016020,GO:0016021,GO:0031224,GO:0031226,GO:0042221,GO:0042493,GO:0042891,GO:0044425,GO:0044459,GO:0044464,GO:0046677,GO:0050896,GO:0051179,GO:0051234,GO:0071944	-	ko:K05685	ko02010,map02010	M00709	-	-	ko00000,ko00001,ko00002,ko01000,ko02000	3.A.1.122.1,3.A.1.122.12	-	-	ABC_tran,FtsX,MacB_PCD
PALA8_02808	287.DR97_6043	3.38e-256	705.0	COG0845@1|root,COG0845@2|Bacteria,1MU8D@1224|Proteobacteria,1RN0E@1236|Gammaproteobacteria,1YFP5@136841|Pseudomonas aeruginosa group	1236|Gammaproteobacteria	M	Barrel-sandwich domain of CusB or HlyD membrane-fusion	pvdR	-	-	ko:K02005,ko:K13888	-	M00709	-	-	ko00000,ko00002,ko02000	8.A.1	-	-	HlyD_D23
PALA8_02809	287.DR97_6044	3.74e-241	662.0	COG3712@1|root,COG3712@2|Bacteria,1RF1W@1224|Proteobacteria,1SYDM@1236|Gammaproteobacteria,1YKVD@136841|Pseudomonas aeruginosa group	1236|Gammaproteobacteria	PT	Domain of unknown function (DUF4880)	fpvR	-	-	ko:K07165	-	-	-	-	ko00000	-	-	-	DUF4880,DUF4974,FecR
PALA8_02810	287.DR97_6045	2.89e-105	304.0	COG1595@1|root,COG1595@2|Bacteria,1RM2Q@1224|Proteobacteria,1S80F@1236|Gammaproteobacteria,1YKN0@136841|Pseudomonas aeruginosa group	1236|Gammaproteobacteria	K	ECF sigma factor	fpvI	-	-	ko:K03088	-	-	-	-	ko00000,ko03021	-	-	-	Sigma70_r2,Sigma70_r4_2
PALA8_02811	287.DR97_6046	0.0	881.0	COG3486@1|root,COG3486@2|Bacteria,1MX36@1224|Proteobacteria,1RZXS@1236|Gammaproteobacteria,1YEE3@136841|Pseudomonas aeruginosa group	1236|Gammaproteobacteria	Q	L-lysine 6-monooxygenase (NADPH-requiring)	pvdA	-	1.14.13.195,1.14.13.196	ko:K10531	-	-	-	-	ko00000,ko01000	-	-	-	K_oxygenase
PALA8_02812	287.DR97_6047	0.0	1521.0	COG2366@1|root,COG2366@2|Bacteria,1MVMH@1224|Proteobacteria,1RMPX@1236|Gammaproteobacteria,1YIUH@136841|Pseudomonas aeruginosa group	1236|Gammaproteobacteria	S	Penicillin amidase	pvdQ	-	3.5.1.97	ko:K07116	-	-	-	-	ko00000,ko01000	-	-	-	Penicil_amidase
PALA8_02813	287.DR97_6048	1.92e-67	204.0	COG0735@1|root,COG0735@2|Bacteria,1QEM6@1224|Proteobacteria,1TBD5@1236|Gammaproteobacteria,1YH8G@136841|Pseudomonas aeruginosa group	1236|Gammaproteobacteria	P	belongs to the Fur family	-	-	-	-	-	-	-	-	-	-	-	-	FUR,HTH_12
PALA8_02814	287.DR97_6049	1.47e-214	593.0	COG0583@1|root,COG0583@2|Bacteria,1MWY0@1224|Proteobacteria,1SN88@1236|Gammaproteobacteria,1YKVE@136841|Pseudomonas aeruginosa group	1236|Gammaproteobacteria	K	LysR substrate binding domain	-	-	-	-	-	-	-	-	-	-	-	-	HTH_1,LysR_substrate
PALA8_02815	287.DR97_6050	5.88e-278	759.0	COG1304@1|root,COG1304@2|Bacteria,1MUEZ@1224|Proteobacteria,1RPA1@1236|Gammaproteobacteria,1YFCI@136841|Pseudomonas aeruginosa group	1236|Gammaproteobacteria	C	Catalyzes the conversion of L-lactate to pyruvate. Is coupled to the respiratory chain	lldD	-	1.1.2.3	ko:K00101	ko00620,ko01100,map00620,map01100	-	R00196	RC00044	ko00000,ko00001,ko01000	-	-	-	FMN_dh
PALA8_02817	287.DR97_6052	1.18e-50	160.0	2AS94@1|root,31HN7@2|Bacteria,1QFCX@1224|Proteobacteria,1TCK3@1236|Gammaproteobacteria,1YKEI@136841|Pseudomonas aeruginosa group	1236|Gammaproteobacteria	-	-	-	-	-	-	-	-	-	-	-	-	-	-	-
PALA8_02818	287.DR97_6053	1.34e-113	325.0	COG2080@1|root,COG2080@2|Bacteria,1RD8C@1224|Proteobacteria,1S3RP@1236|Gammaproteobacteria,1YG53@136841|Pseudomonas aeruginosa group	1236|Gammaproteobacteria	C	[2Fe-2S] binding domain	iorA	-	1.17.2.1,1.3.99.16	ko:K07302,ko:K18029	ko00760,ko01120,map00760,map01120	M00622	R09473	RC00589	ko00000,ko00001,ko00002,ko01000	-	-	-	Fer2,Fer2_2
PALA8_02819	287.DR97_6054	0.0	1560.0	COG1529@1|root,COG1529@2|Bacteria,1QTTJ@1224|Proteobacteria,1RNCM@1236|Gammaproteobacteria,1YDAJ@136841|Pseudomonas aeruginosa group	1236|Gammaproteobacteria	C	Aldehyde oxidase and xanthine dehydrogenase, a/b hammerhead domain	iorB	-	1.3.99.16	ko:K07303	-	-	-	-	ko00000,ko01000	-	-	-	Ald_Xan_dh_C,Ald_Xan_dh_C2,TAT_signal
PALA8_02820	287.DR97_6055	5e-295	804.0	COG1840@1|root,COG1840@2|Bacteria,1PDQ6@1224|Proteobacteria,1RZD6@1236|Gammaproteobacteria	1236|Gammaproteobacteria	P	PFAM extracellular solute-binding protein family 1	-	-	-	-	-	-	-	-	-	-	-	-	SBP_bac_6
PALA8_02821	287.DR97_6056	5.2e-139	394.0	COG2197@1|root,COG2197@2|Bacteria,1REBF@1224|Proteobacteria,1RWKT@1236|Gammaproteobacteria,1YG4U@136841|Pseudomonas aeruginosa group	1236|Gammaproteobacteria	K	helix_turn_helix, Lux Regulon	-	-	-	-	-	-	-	-	-	-	-	-	GerE,Response_reg
PALA8_02822	287.DR97_6057	7.66e-92	268.0	2ANY6@1|root,31DZ3@2|Bacteria,1RIZN@1224|Proteobacteria,1S77G@1236|Gammaproteobacteria,1YH6S@136841|Pseudomonas aeruginosa group	1236|Gammaproteobacteria	S	Domain of unknown function (DUF4280)	-	-	-	-	-	-	-	-	-	-	-	-	DUF4280
PALA8_02823	287.DR97_6058	1.07e-63	201.0	COG2849@1|root,COG2849@2|Bacteria,1MYAR@1224|Proteobacteria,1SD0P@1236|Gammaproteobacteria,1YG5P@136841|Pseudomonas aeruginosa group	1236|Gammaproteobacteria	S	MORN repeat variant	-	-	-	-	-	-	-	-	-	-	-	-	MORN_2
PALA8_02824	287.DR97_6059	0.0	1052.0	COG3501@1|root,COG3501@2|Bacteria,1MU7Q@1224|Proteobacteria,1RMZS@1236|Gammaproteobacteria,1YFD4@136841|Pseudomonas aeruginosa group	1236|Gammaproteobacteria	S	Gp5 C-terminal repeat (3 copies)	vgrG	-	-	ko:K11904	ko03070,map03070	M00334	-	-	ko00000,ko00001,ko00002,ko02044	3.A.23.1	-	-	Gp5_C,Phage_GPD
PALA8_02825	1005395.CSV86_19430	2.97e-118	353.0	2C93F@1|root,2ZVGC@2|Bacteria,1P6MB@1224|Proteobacteria,1SUUR@1236|Gammaproteobacteria	1236|Gammaproteobacteria	-	-	-	-	-	-	-	-	-	-	-	-	-	-	-
PALA8_02827	287.DR97_6061	0.0	1578.0	COG0542@1|root,COG0542@2|Bacteria,1MVBH@1224|Proteobacteria,1RMZH@1236|Gammaproteobacteria,1YDH5@136841|Pseudomonas aeruginosa group	1236|Gammaproteobacteria	O	Clp amino terminal domain, pathogenicity island component	-	-	-	ko:K11907	ko02025,ko03070,map02025,map03070	M00334	-	-	ko00000,ko00001,ko00002,ko02044	3.A.23.1	-	-	AAA,AAA_2,ClpB_D2-small,Clp_N
PALA8_02828	287.DR97_6062	5.68e-235	647.0	COG3520@1|root,COG3520@2|Bacteria,1MWVS@1224|Proteobacteria,1RQD5@1236|Gammaproteobacteria,1YEH8@136841|Pseudomonas aeruginosa group	1236|Gammaproteobacteria	S	Type VI secretion, TssG	-	-	-	ko:K11895	ko02025,map02025	M00334	-	-	ko00000,ko00001,ko00002,ko02044	3.A.23.1	-	-	T6SS_TssG
PALA8_02829	287.DR97_6063	2.87e-133	393.0	COG3519@1|root,COG3519@2|Bacteria,1MUY4@1224|Proteobacteria,1RPK4@1236|Gammaproteobacteria,1YDPC@136841|Pseudomonas aeruginosa group	1236|Gammaproteobacteria	S	Type VI secretion system, TssF	-	-	-	ko:K11896	-	M00334	-	-	ko00000,ko00002,ko02044	3.A.23.1	-	-	T6SS_TssF
PALA8_02830	287.DR97_6032	0.0	9197.0	COG1020@1|root,COG1020@2|Bacteria,1QK4F@1224|Proteobacteria,1RPAG@1236|Gammaproteobacteria,1YFH6@136841|Pseudomonas aeruginosa group	1236|Gammaproteobacteria	Q	AA-adenyl-dom amino acid adenylation domain protein	pvdJ	-	-	ko:K12239,ko:K12240	ko01053,map01053	-	-	-	ko00000,ko00001,ko01008	-	-	-	AMP-binding,AMP-binding_C,Condensation,PP-binding,TauD,Thioesterase
PALA8_02831	287.DR97_6033	1.98e-231	637.0	COG0657@1|root,COG0657@2|Bacteria,1NEXK@1224|Proteobacteria,1RNNH@1236|Gammaproteobacteria,1YFVX@136841|Pseudomonas aeruginosa group	1236|Gammaproteobacteria	I	alpha/beta hydrolase fold	-	-	-	ko:K01066	-	-	-	-	ko00000,ko01000	-	-	-	Abhydrolase_3
PALA8_02832	287.DR97_6034	0.0	1520.0	COG4774@1|root,COG4774@2|Bacteria,1MV0X@1224|Proteobacteria,1T1GW@1236|Gammaproteobacteria,1YE6N@136841|Pseudomonas aeruginosa group	1236|Gammaproteobacteria	P	Secretin and TonB N terminus short domain	-	-	-	ko:K02014	-	-	-	-	ko00000,ko02000	1.B.14	-	-	Plug,STN,TonB_dep_Rec
PALA8_02833	287.DR97_6035	0.0	1046.0	COG4615@1|root,COG4615@2|Bacteria,1MVIC@1224|Proteobacteria,1RMYK@1236|Gammaproteobacteria,1YEM6@136841|Pseudomonas aeruginosa group	1236|Gammaproteobacteria	V	ATPases associated with a variety of cellular activities	pvdE	-	-	ko:K06160	ko02010,map02010	-	-	-	ko00000,ko00001,ko02000	3.A.1.113.2	-	-	ABC_membrane,ABC_tran
PALA8_02834	287.DR97_6036	3.82e-201	557.0	COG0299@1|root,COG0299@2|Bacteria,1QDP4@1224|Proteobacteria,1ST58@1236|Gammaproteobacteria	1236|Gammaproteobacteria	F	N(5)-hydroxyornithine transformylase PvdF	-	-	-	-	-	-	-	-	-	-	-	-	Formyl_trans_N
PALA8_02835	287.DR97_6037	4.26e-221	607.0	COG1262@1|root,COG1262@2|Bacteria,1NQ5K@1224|Proteobacteria,1S6X1@1236|Gammaproteobacteria,1YKP1@136841|Pseudomonas aeruginosa group	1236|Gammaproteobacteria	S	Sulfatase-modifying factor enzyme 1	pvdO	-	-	-	-	-	-	-	-	-	-	-	FGE-sulfatase,Peptidase_C14
PALA8_02836	287.DR97_6038	2.39e-313	853.0	COG0520@1|root,COG0520@2|Bacteria,1R4SM@1224|Proteobacteria,1RQR6@1236|Gammaproteobacteria,1YIFB@136841|Pseudomonas aeruginosa group	1236|Gammaproteobacteria	E	Aminotransferase class-V	pvdN	-	5.1.1.17	ko:K04127	ko00311,ko01100,ko01130,map00311,map01100,map01130	M00673	R04147	RC00302	ko00000,ko00001,ko00002,ko01000	-	-	-	Aminotran_5
PALA8_02837	287.DR97_6039	0.0	899.0	COG2355@1|root,COG2355@2|Bacteria,1MWEW@1224|Proteobacteria,1S4IM@1236|Gammaproteobacteria,1YGEU@136841|Pseudomonas aeruginosa group	1236|Gammaproteobacteria	E	Membrane dipeptidase (Peptidase family M19)	pvdM	-	3.4.13.19	ko:K01273	-	-	-	-	ko00000,ko00537,ko01000,ko01002,ko04147	-	-	-	Peptidase_M19
PALA8_02838	287.DR97_6040	0.0	1147.0	28KG6@1|root,2ZA22@2|Bacteria,1N1KV@1224|Proteobacteria,1SJRQ@1236|Gammaproteobacteria,1YHK8@136841|Pseudomonas aeruginosa group	1236|Gammaproteobacteria	S	PvdJ PvdD PvdP-like protein	pvdP	-	-	-	-	-	-	-	-	-	-	-	-
PALA8_02839	287.DR97_6041	0.0	875.0	COG1538@1|root,COG1538@2|Bacteria,1MUA8@1224|Proteobacteria,1RMDA@1236|Gammaproteobacteria,1YESS@136841|Pseudomonas aeruginosa group	1236|Gammaproteobacteria	M	Outer membrane efflux protein	opmQ	-	-	-	-	-	-	-	-	-	-	-	OEP
PALA8_02840	287.DR97_6042	0.0	1258.0	COG0577@1|root,COG1136@1|root,COG0577@2|Bacteria,COG1136@2|Bacteria,1MU45@1224|Proteobacteria,1RNUJ@1236|Gammaproteobacteria,1YFES@136841|Pseudomonas aeruginosa group	1236|Gammaproteobacteria	V	Part of the tripartite efflux system MacAB-TolC. MacB is a non-canonical ABC transporter that contains transmembrane domains (TMD), which form a pore in the inner membrane, and an ATP-binding domain (NBD), which is responsible for energy generation. Confers resistance against macrolides	macB	GO:0005575,GO:0005623,GO:0005886,GO:0005887,GO:0006810,GO:0008150,GO:0015893,GO:0016020,GO:0016021,GO:0031224,GO:0031226,GO:0042221,GO:0042493,GO:0042891,GO:0044425,GO:0044459,GO:0044464,GO:0046677,GO:0050896,GO:0051179,GO:0051234,GO:0071944	-	ko:K05685	ko02010,map02010	M00709	-	-	ko00000,ko00001,ko00002,ko01000,ko02000	3.A.1.122.1,3.A.1.122.12	-	-	ABC_tran,FtsX,MacB_PCD
PALA8_02841	287.DR97_6043	3.38e-256	705.0	COG0845@1|root,COG0845@2|Bacteria,1MU8D@1224|Proteobacteria,1RN0E@1236|Gammaproteobacteria,1YFP5@136841|Pseudomonas aeruginosa group	1236|Gammaproteobacteria	M	Barrel-sandwich domain of CusB or HlyD membrane-fusion	pvdR	-	-	ko:K02005,ko:K13888	-	M00709	-	-	ko00000,ko00002,ko02000	8.A.1	-	-	HlyD_D23
PALA8_02842	287.DR97_6044	3.74e-241	662.0	COG3712@1|root,COG3712@2|Bacteria,1RF1W@1224|Proteobacteria,1SYDM@1236|Gammaproteobacteria,1YKVD@136841|Pseudomonas aeruginosa group	1236|Gammaproteobacteria	PT	Domain of unknown function (DUF4880)	fpvR	-	-	ko:K07165	-	-	-	-	ko00000	-	-	-	DUF4880,DUF4974,FecR
PALA8_02843	287.DR97_6045	2.89e-105	304.0	COG1595@1|root,COG1595@2|Bacteria,1RM2Q@1224|Proteobacteria,1S80F@1236|Gammaproteobacteria,1YKN0@136841|Pseudomonas aeruginosa group	1236|Gammaproteobacteria	K	ECF sigma factor	fpvI	-	-	ko:K03088	-	-	-	-	ko00000,ko03021	-	-	-	Sigma70_r2,Sigma70_r4_2
PALA8_02844	287.DR97_6046	0.0	881.0	COG3486@1|root,COG3486@2|Bacteria,1MX36@1224|Proteobacteria,1RZXS@1236|Gammaproteobacteria,1YEE3@136841|Pseudomonas aeruginosa group	1236|Gammaproteobacteria	Q	L-lysine 6-monooxygenase (NADPH-requiring)	pvdA	-	1.14.13.195,1.14.13.196	ko:K10531	-	-	-	-	ko00000,ko01000	-	-	-	K_oxygenase
PALA8_02845	287.DR97_6047	0.0	1521.0	COG2366@1|root,COG2366@2|Bacteria,1MVMH@1224|Proteobacteria,1RMPX@1236|Gammaproteobacteria,1YIUH@136841|Pseudomonas aeruginosa group	1236|Gammaproteobacteria	S	Penicillin amidase	pvdQ	-	3.5.1.97	ko:K07116	-	-	-	-	ko00000,ko01000	-	-	-	Penicil_amidase
PALA8_02846	287.DR97_6048	1.92e-67	204.0	COG0735@1|root,COG0735@2|Bacteria,1QEM6@1224|Proteobacteria,1TBD5@1236|Gammaproteobacteria,1YH8G@136841|Pseudomonas aeruginosa group	1236|Gammaproteobacteria	P	belongs to the Fur family	-	-	-	-	-	-	-	-	-	-	-	-	FUR,HTH_12
PALA8_02847	287.DR97_6049	1.47e-214	593.0	COG0583@1|root,COG0583@2|Bacteria,1MWY0@1224|Proteobacteria,1SN88@1236|Gammaproteobacteria,1YKVE@136841|Pseudomonas aeruginosa group	1236|Gammaproteobacteria	K	LysR substrate binding domain	-	-	-	-	-	-	-	-	-	-	-	-	HTH_1,LysR_substrate
PALA8_02848	287.DR97_6050	5.88e-278	759.0	COG1304@1|root,COG1304@2|Bacteria,1MUEZ@1224|Proteobacteria,1RPA1@1236|Gammaproteobacteria,1YFCI@136841|Pseudomonas aeruginosa group	1236|Gammaproteobacteria	C	Catalyzes the conversion of L-lactate to pyruvate. Is coupled to the respiratory chain	lldD	-	1.1.2.3	ko:K00101	ko00620,ko01100,map00620,map01100	-	R00196	RC00044	ko00000,ko00001,ko01000	-	-	-	FMN_dh
PALA8_02850	287.DR97_6052	1.18e-50	160.0	2AS94@1|root,31HN7@2|Bacteria,1QFCX@1224|Proteobacteria,1TCK3@1236|Gammaproteobacteria,1YKEI@136841|Pseudomonas aeruginosa group	1236|Gammaproteobacteria	-	-	-	-	-	-	-	-	-	-	-	-	-	-	-
PALA8_02851	287.DR97_6053	1.34e-113	325.0	COG2080@1|root,COG2080@2|Bacteria,1RD8C@1224|Proteobacteria,1S3RP@1236|Gammaproteobacteria,1YG53@136841|Pseudomonas aeruginosa group	1236|Gammaproteobacteria	C	[2Fe-2S] binding domain	iorA	-	1.17.2.1,1.3.99.16	ko:K07302,ko:K18029	ko00760,ko01120,map00760,map01120	M00622	R09473	RC00589	ko00000,ko00001,ko00002,ko01000	-	-	-	Fer2,Fer2_2
PALA8_02852	287.DR97_6054	0.0	1560.0	COG1529@1|root,COG1529@2|Bacteria,1QTTJ@1224|Proteobacteria,1RNCM@1236|Gammaproteobacteria,1YDAJ@136841|Pseudomonas aeruginosa group	1236|Gammaproteobacteria	C	Aldehyde oxidase and xanthine dehydrogenase, a/b hammerhead domain	iorB	-	1.3.99.16	ko:K07303	-	-	-	-	ko00000,ko01000	-	-	-	Ald_Xan_dh_C,Ald_Xan_dh_C2,TAT_signal
PALA8_02853	287.DR97_6055	5e-295	804.0	COG1840@1|root,COG1840@2|Bacteria,1PDQ6@1224|Proteobacteria,1RZD6@1236|Gammaproteobacteria	1236|Gammaproteobacteria	P	PFAM extracellular solute-binding protein family 1	-	-	-	-	-	-	-	-	-	-	-	-	SBP_bac_6
PALA8_02854	287.DR97_6056	5.2e-139	394.0	COG2197@1|root,COG2197@2|Bacteria,1REBF@1224|Proteobacteria,1RWKT@1236|Gammaproteobacteria,1YG4U@136841|Pseudomonas aeruginosa group	1236|Gammaproteobacteria	K	helix_turn_helix, Lux Regulon	-	-	-	-	-	-	-	-	-	-	-	-	GerE,Response_reg
PALA8_02855	287.DR97_6057	7.66e-92	268.0	2ANY6@1|root,31DZ3@2|Bacteria,1RIZN@1224|Proteobacteria,1S77G@1236|Gammaproteobacteria,1YH6S@136841|Pseudomonas aeruginosa group	1236|Gammaproteobacteria	S	Domain of unknown function (DUF4280)	-	-	-	-	-	-	-	-	-	-	-	-	DUF4280
PALA8_02856	287.DR97_6058	1.07e-63	201.0	COG2849@1|root,COG2849@2|Bacteria,1MYAR@1224|Proteobacteria,1SD0P@1236|Gammaproteobacteria,1YG5P@136841|Pseudomonas aeruginosa group	1236|Gammaproteobacteria	S	MORN repeat variant	-	-	-	-	-	-	-	-	-	-	-	-	MORN_2
PALA8_02858	1005395.CSV86_19430	2.97e-118	353.0	2C93F@1|root,2ZVGC@2|Bacteria,1P6MB@1224|Proteobacteria,1SUUR@1236|Gammaproteobacteria	1236|Gammaproteobacteria	-	-	-	-	-	-	-	-	-	-	-	-	-	-	-
PALA8_02912	287.DR97_6117	6.81e-272	745.0	COG1680@1|root,COG1680@2|Bacteria,1MVPR@1224|Proteobacteria,1RRTD@1236|Gammaproteobacteria	1236|Gammaproteobacteria	V	COG1680 Beta-lactamase class C and other penicillin binding proteins	yfeW	-	-	-	-	-	-	-	-	-	-	-	Beta-lactamase
PALA8_02925	287.DR97_6131	0.0	2626.0	COG1020@1|root,COG3208@1|root,COG1020@2|Bacteria,COG3208@2|Bacteria,1QK4F@1224|Proteobacteria,1RPAG@1236|Gammaproteobacteria,1YFH6@136841|Pseudomonas aeruginosa group	1236|Gammaproteobacteria	Q	AA-adenyl-dom amino acid adenylation domain protein	-	-	-	ko:K04788,ko:K12239,ko:K12240,ko:K15674	ko01053,map01053	-	-	-	ko00000,ko00001,ko01008	-	-	-	AMP-binding,AMP-binding_C,Condensation,KAsynt_C_assoc,Ketoacyl-synt_C,PP-binding,Thioesterase,ketoacyl-synt
PALA8_02973	1005395.CSV86_02202	2.06e-15	70.9	COG2963@1|root,COG2963@2|Bacteria,1RHBZ@1224|Proteobacteria,1S69Y@1236|Gammaproteobacteria	1236|Gammaproteobacteria	L	Transposase	-	GO:0005575,GO:0005623,GO:0006139,GO:0006259,GO:0006310,GO:0006313,GO:0006725,GO:0006807,GO:0008150,GO:0008152,GO:0009279,GO:0009405,GO:0009987,GO:0016020,GO:0019867,GO:0030260,GO:0030312,GO:0030313,GO:0031975,GO:0032196,GO:0034641,GO:0043170,GO:0044237,GO:0044238,GO:0044260,GO:0044403,GO:0044409,GO:0044419,GO:0044462,GO:0044464,GO:0046483,GO:0051701,GO:0051704,GO:0051806,GO:0051828,GO:0071704,GO:…	-	ko:K07483	-	-	-	-	ko00000	-	-	-	HTH_Tnp_1
PALA8_02974	1141662.OOA_18609	6.46e-112	341.0	COG2931@1|root,COG2931@2|Bacteria,1MU7T@1224|Proteobacteria,1TE7U@1236|Gammaproteobacteria,3Z9S5@586|Providencia	1236|Gammaproteobacteria	Q	COG2931 RTX toxins and related Ca2 -binding proteins	-	-	-	-	-	-	-	-	-	-	-	-	-
PALA8_02976	1005395.CSV86_02197	8.85e-43	144.0	COG2801@1|root,COG2801@2|Bacteria,1MVXQ@1224|Proteobacteria,1RPEW@1236|Gammaproteobacteria,1YW93@136845|Pseudomonas putida group	1236|Gammaproteobacteria	L	DDE domain	-	-	-	ko:K07497	-	-	-	-	ko00000	-	-	-	HTH_21,rve
PALA8_02993	287.DR97_6316	0.0	1115.0	COG0489@1|root,COG3206@1|root,COG0489@2|Bacteria,COG3206@2|Bacteria,1R6RF@1224|Proteobacteria,1S79X@1236|Gammaproteobacteria,1YFQA@136841|Pseudomonas aeruginosa group	1236|Gammaproteobacteria	DM	Chain length determinant protein	pslE	-	-	ko:K20998	ko02025,map02025	-	-	-	ko00000,ko00001	-	-	-	-
PALA8_02996	287.DR97_6317	2.13e-76	233.0	COG1596@1|root,COG1596@2|Bacteria,1RG85@1224|Proteobacteria,1T9ND@1236|Gammaproteobacteria,1YD7P@136841|Pseudomonas aeruginosa group	1236|Gammaproteobacteria	M	Polysaccharide biosynthesis/export protein	-	-	-	ko:K20987	ko02025,map02025	-	-	-	ko00000,ko00001,ko02000	1.B.18	-	-	Poly_export
PALA8_03002	287.DR97_6323	7.12e-296	806.0	COG1680@1|root,COG1680@2|Bacteria,1P3SQ@1224|Proteobacteria,1RPEJ@1236|Gammaproteobacteria,1YJ5G@136841|Pseudomonas aeruginosa group	1236|Gammaproteobacteria	V	Beta-lactamase	-	-	-	-	-	-	-	-	-	-	-	-	Beta-lactamase
PALA8_03003	287.DR97_6324	3.72e-238	654.0	COG2207@1|root,COG2207@2|Bacteria	2|Bacteria	K	Transcriptional regulator	-	-	-	-	-	-	-	-	-	-	-	-	Arabinose_bd,HTH_18
PALA8_03006	287.DR97_6328	4.82e-196	546.0	COG1880@1|root,COG1880@2|Bacteria	2|Bacteria	CH	PFAM CO dehydrogenase beta subunit acetyl-CoA synthase epsilon subunit	lplA	-	6.3.1.20	ko:K00195,ko:K03800	ko00680,ko00785,ko01100,ko01120,ko01200,map00680,map00785,map01100,map01120,map01200	M00422	R07157,R07770,R07771,R11143	RC00043,RC00070,RC00090,RC00992,RC02800,RC02896	ko00000,ko00001,ko00002,ko01000	-	-	-	BPL_LplA_LipB,CO_dh
PALA8_03008	287.DR97_6330	1.03e-203	566.0	COG2801@1|root,COG2801@2|Bacteria,1MWVQ@1224|Proteobacteria,1RN12@1236|Gammaproteobacteria	1236|Gammaproteobacteria	L	PFAM Integrase catalytic	-	-	-	-	-	-	-	-	-	-	-	-	HTH_23,HTH_28,HTH_32,rve
PALA8_03010	287.DR97_6185	3.9e-210	580.0	COG5285@1|root,COG5285@2|Bacteria,1R7ST@1224|Proteobacteria,1TBKD@1236|Gammaproteobacteria,1YHZN@136841|Pseudomonas aeruginosa group	1236|Gammaproteobacteria	Q	Phytanoyl-CoA dioxygenase (PhyH)	-	-	-	-	-	-	-	-	-	-	-	-	PhyH
PALA8_03011	287.DR97_6186	6.28e-191	534.0	COG4447@1|root,COG4447@2|Bacteria,1Q7AA@1224|Proteobacteria,1SI2T@1236|Gammaproteobacteria,1YIMN@136841|Pseudomonas aeruginosa group	1236|Gammaproteobacteria	S	Photosynthesis system II assembly factor YCF48	-	-	-	-	-	-	-	-	-	-	-	-	PSII_BNR
PALA8_03022	287.DR97_6197	7.68e-309	843.0	COG0531@1|root,COG0531@2|Bacteria,1MXNJ@1224|Proteobacteria,1RMKV@1236|Gammaproteobacteria,1YFSA@136841|Pseudomonas aeruginosa group	1236|Gammaproteobacteria	E	Amino acid permease	-	-	-	ko:K14052	-	-	-	-	ko00000,ko02000	2.A.3.1.13	-	-	AA_permease,AA_permease_2
PALA8_03032	287.DR97_6207	6.88e-73	219.0	2DRYN@1|root,33DQH@2|Bacteria,1NIW2@1224|Proteobacteria,1SVPV@1236|Gammaproteobacteria,1YKE8@136841|Pseudomonas aeruginosa group	1236|Gammaproteobacteria	-	-	-	-	-	-	-	-	-	-	-	-	-	-	-
PALA8_03033	287.DR97_6208	1.58e-251	689.0	COG3173@1|root,COG3173@2|Bacteria,1MY0Y@1224|Proteobacteria,1S3A0@1236|Gammaproteobacteria,1YHE1@136841|Pseudomonas aeruginosa group	1236|Gammaproteobacteria	S	Phosphotransferase enzyme family	-	-	-	-	-	-	-	-	-	-	-	-	APH
PALA8_03055	287.DR97_6230	0.0	1008.0	COG4943@1|root,COG4943@2|Bacteria,1MVTH@1224|Proteobacteria,1RMDP@1236|Gammaproteobacteria,1YJSR@136841|Pseudomonas aeruginosa group	1236|Gammaproteobacteria	T	Putative diguanylate phosphodiesterase	yjcC	-	-	-	-	-	-	-	-	-	-	-	CSS-motif,EAL
PALA8_03063	287.DR97_6240	9.57e-254	698.0	COG3064@1|root,COG3064@2|Bacteria,1R4B3@1224|Proteobacteria,1S3GN@1236|Gammaproteobacteria	1236|Gammaproteobacteria	M	Anthrax toxin LF subunit	exoY	-	-	ko:K16637	-	-	-	-	ko00000,ko02042	-	-	-	Anthrax_toxA
PALA8_03065	287.DR97_6242	6.63e-95	276.0	COG5478@1|root,COG5478@2|Bacteria,1MZMZ@1224|Proteobacteria,1S9ZW@1236|Gammaproteobacteria,1YJSB@136841|Pseudomonas aeruginosa group	1236|Gammaproteobacteria	S	Low affinity iron permease	-	-	-	-	-	-	-	-	-	-	-	-	Iron_permease
PALA8_03073	287.DR97_6250	1.35e-73	221.0	2AS5I@1|root,31HIF@2|Bacteria,1QF97@1224|Proteobacteria,1TCED@1236|Gammaproteobacteria,1YK8U@136841|Pseudomonas aeruginosa group	1236|Gammaproteobacteria	-	-	-	-	-	-	-	-	-	-	-	-	-	-	-
PALA8_03082	287.DR97_6260	1.87e-76	228.0	2BQ73@1|root,32J1Q@2|Bacteria,1QF9T@1224|Proteobacteria,1TCF5@1236|Gammaproteobacteria,1YK9K@136841|Pseudomonas aeruginosa group	1236|Gammaproteobacteria	S	Protein of unknown function (DUF3509)	-	-	-	-	-	-	-	-	-	-	-	-	DUF3509
PALA8_03125	287.DR97_5725	5.09e-316	858.0	COG3969@1|root,COG3969@2|Bacteria,1NBDM@1224|Proteobacteria,1RYRP@1236|Gammaproteobacteria	1236|Gammaproteobacteria	S	phosphoadenosine phosphosulfate	ybdN	-	-	-	-	-	-	-	-	-	-	-	DUF3440,PAPS_reduct
PALA8_03133	864051.BurJ1DRAFT_1799	3.66e-122	364.0	COG0604@1|root,COG0604@2|Bacteria,1QUNT@1224|Proteobacteria,2VM3W@28216|Betaproteobacteria	28216|Betaproteobacteria	C	Protein of unknown function (DUF2855)	-	-	-	-	-	-	-	-	-	-	-	-	DUF2855
PALA8_03151	587753.EY04_17560	2.89e-81	246.0	COG1309@1|root,COG1309@2|Bacteria,1R679@1224|Proteobacteria,1SB1A@1236|Gammaproteobacteria	1236|Gammaproteobacteria	K	transcriptional regulator	-	-	-	-	-	-	-	-	-	-	-	-	TetR_N
PALA8_03153	587753.EY04_17575	1.36e-128	371.0	COG0625@1|root,COG0625@2|Bacteria,1RD7K@1224|Proteobacteria,1S42S@1236|Gammaproteobacteria	1236|Gammaproteobacteria	O	Glutathione S-transferase	-	-	-	-	-	-	-	-	-	-	-	-	GST_C,GST_C_2,GST_N_3
PALA8_03154	587753.EY04_17580	1.01e-64	201.0	COG0824@1|root,COG0824@2|Bacteria,1NN78@1224|Proteobacteria,1SHSA@1236|Gammaproteobacteria	1236|Gammaproteobacteria	S	Thioesterase-like superfamily	-	-	-	ko:K07107	-	-	-	-	ko00000,ko01000	-	-	-	4HBT_2
PALA8_03212	1242864.D187_003624	1.67e-110	342.0	2BKHB@1|root,32EYB@2|Bacteria,1MYVD@1224|Proteobacteria	1224|Proteobacteria	-	-	-	-	-	-	-	-	-	-	-	-	-	-	-
PALA8_03311	272568.GDI0757	1.45e-95	318.0	COG2188@1|root,COG2188@2|Bacteria,1NRCT@1224|Proteobacteria,2UPBF@28211|Alphaproteobacteria,2JVSC@204441|Rhodospirillales	204441|Rhodospirillales	K	Transcriptional regulator	-	-	-	-	-	-	-	-	-	-	-	-	-
PALA8_03326	287.DR97_5924	8.21e-143	410.0	COG0500@1|root,COG0500@2|Bacteria	2|Bacteria	Q	methyltransferase activity	-	-	-	-	-	-	-	-	-	-	-	-	Methyltransf_11,Methyltransf_23,Methyltransf_25,Methyltransf_31
PALA8_03331	287.DR97_5929	1.11e-81	241.0	COG3450@1|root,COG3450@2|Bacteria,1N76U@1224|Proteobacteria,1SS7U@1236|Gammaproteobacteria,1YJXJ@136841|Pseudomonas aeruginosa group	1236|Gammaproteobacteria	S	Protein of unknown function (DUF861)	-	-	-	ko:K06995	-	-	-	-	ko00000	-	-	-	Cupin_3
PALA8_03395	686578.AFFX01000001_gene1255	2.91e-281	776.0	COG0168@1|root,COG0168@2|Bacteria,1MUIJ@1224|Proteobacteria,1RMN6@1236|Gammaproteobacteria	1236|Gammaproteobacteria	P	Low-affinity potassium transport system. Interacts with trk system potassium uptake protein TrkA	trkH	-	-	ko:K03498	-	-	-	-	ko00000,ko02000	2.A.38.1,2.A.38.4	-	-	TrkH
PALA8_03612	1221522.B723_12870	9.34e-98	292.0	2DP3C@1|root,32UK6@2|Bacteria,1MZSQ@1224|Proteobacteria,1S8VD@1236|Gammaproteobacteria,1YSQJ@136843|Pseudomonas fluorescens group	1236|Gammaproteobacteria	S	Domain of unknown function (DUF4123)	-	-	-	-	-	-	-	-	-	-	-	-	DUF4123
PALA8_03613	301.JNHE01000030_gene612	0.0	1649.0	COG3209@1|root,COG3209@2|Bacteria,1MVV1@1224|Proteobacteria,1SKYM@1236|Gammaproteobacteria,1YF61@136841|Pseudomonas aeruginosa group	1236|Gammaproteobacteria	M	RHS protein	-	-	-	-	-	-	-	-	-	-	-	-	RHS,RHS_repeat,Tox-HNH-EHHH
PALA8_03614	78398.KS43_01740	3.63e-29	111.0	2FHXW@1|root,349QW@2|Bacteria,1P0Q3@1224|Proteobacteria	1224|Proteobacteria	-	-	-	-	-	-	-	-	-	-	-	-	-	-	-
PALA8_03711	287.DR97_374	3.11e-283	785.0	COG0840@1|root,COG0840@2|Bacteria,1MU9B@1224|Proteobacteria,1RMH0@1236|Gammaproteobacteria,1YDWS@136841|Pseudomonas aeruginosa group	1236|Gammaproteobacteria	NT	Methyl-accepting chemotaxis-like domains (chemotaxis sensory transducer).	aer-2	-	-	ko:K03776	ko02020,ko02030,map02020,map02030	-	-	-	ko00000,ko00001,ko02035	-	-	-	MCPsignal,PAS_3
PALA8_03713	287.DR97_375	5.16e-112	330.0	COG0451@1|root,COG0451@2|Bacteria,1MVGI@1224|Proteobacteria,1T1HA@1236|Gammaproteobacteria,1YHFQ@136841|Pseudomonas aeruginosa group	1236|Gammaproteobacteria	GM	Male sterility protein	hetM	-	-	-	-	-	-	-	-	-	-	-	NAD_binding_4
PALA8_03744	1226994.AMZB01000026_gene533	1.51e-253	697.0	COG4748@1|root,COG4748@2|Bacteria,1MXDA@1224|Proteobacteria,1RSNI@1236|Gammaproteobacteria,1YIYV@136841|Pseudomonas aeruginosa group	1236|Gammaproteobacteria	S	Type I restriction enzyme R protein N terminus (HSDR_N)	-	-	-	ko:K07504	-	-	-	-	ko00000	-	-	-	HSDR_N,HSDR_N_2
PALA8_03765	287.DR97_512	0.0	1175.0	COG1075@1|root,COG1075@2|Bacteria,1RAUT@1224|Proteobacteria,1RPQ0@1236|Gammaproteobacteria	1236|Gammaproteobacteria	S	acetyltransferases and hydrolases with the alpha beta hydrolase fold	-	-	-	-	-	-	-	-	-	-	-	-	LCAT,PGAP1
PALA8_03766	287.DR97_513	3.53e-277	757.0	28NB1@1|root,2ZBEK@2|Bacteria,1MXV0@1224|Proteobacteria,1SIXQ@1236|Gammaproteobacteria	1236|Gammaproteobacteria	-	-	-	-	-	-	-	-	-	-	-	-	-	-	-
PALA8_03850	287.DR97_597	0.0	1080.0	COG1520@1|root,COG1520@2|Bacteria,1NXIC@1224|Proteobacteria,1SPUV@1236|Gammaproteobacteria	1236|Gammaproteobacteria	S	Part of the outer membrane protein assembly complex, which is involved in assembly and insertion of beta-barrel proteins into the outer membrane	-	-	-	-	-	-	-	-	-	-	-	-	-
PALA8_03884	287.DR97_630	1.47e-132	376.0	COG0529@1|root,COG0529@2|Bacteria,1MX0D@1224|Proteobacteria,1RNWT@1236|Gammaproteobacteria,1YHNQ@136841|Pseudomonas aeruginosa group	1236|Gammaproteobacteria	P	Catalyzes the synthesis of activated sulfate	cysC	-	2.7.1.25,2.7.7.4	ko:K00860,ko:K00955	ko00230,ko00261,ko00450,ko00920,ko01100,ko01120,ko01130,map00230,map00261,map00450,map00920,map01100,map01120,map01130	M00176	R00509,R00529,R04928,R04929	RC00002,RC00078,RC02809,RC02889	ko00000,ko00001,ko00002,ko01000	-	-	-	APS_kinase,GTP_EFTU
PALA8_03885	287.DR97_631	7.88e-286	781.0	COG3551@1|root,COG3551@2|Bacteria,1PDQB@1224|Proteobacteria,1RXFR@1236|Gammaproteobacteria,1YJZS@136841|Pseudomonas aeruginosa group	1236|Gammaproteobacteria	S	Protein conserved in bacteria	-	-	-	ko:K20444	-	-	-	-	ko00000,ko01000,ko01005,ko02000	4.D.1.3	GT2,GT4	-	-
PALA8_03886	287.DR97_632	2.74e-306	834.0	COG0438@1|root,COG0438@2|Bacteria,1R564@1224|Proteobacteria,1RZBT@1236|Gammaproteobacteria	1236|Gammaproteobacteria	M	PFAM Glycosyl transferase, group 1	-	-	-	-	-	-	-	-	-	-	-	-	Glyco_trans_1_4,Glyco_transf_4,Glycos_transf_1
PALA8_03887	287.DR97_633	2.24e-218	606.0	COG1216@1|root,COG1216@2|Bacteria,1N2VJ@1224|Proteobacteria	1224|Proteobacteria	M	Pfam Glycosyl transferase family 2	-	-	-	-	-	-	-	-	-	-	-	-	Glyco_trans_4_4,Glycos_transf_1,Glycos_transf_2
PALA8_03888	287.DR97_634	0.0	979.0	COG0438@1|root,COG0438@2|Bacteria,1RCC7@1224|Proteobacteria,1S51S@1236|Gammaproteobacteria	1236|Gammaproteobacteria	M	PFAM Glycosyl transferase, group 1	-	-	-	-	-	-	-	-	-	-	-	-	Glyco_trans_1_4,Glyco_trans_4_4,Glyco_transf_4,Glycos_transf_1
PALA8_03890	287.DR97_636	7.29e-307	835.0	2ARRS@1|root,31H31@2|Bacteria,1QES0@1224|Proteobacteria,1TBM6@1236|Gammaproteobacteria,1YI1H@136841|Pseudomonas aeruginosa group	1236|Gammaproteobacteria	S	Sulfotransferase family	-	-	-	-	-	-	-	-	-	-	-	-	Sulfotransfer_3
PALA8_03891	287.DR97_637	1.02e-232	640.0	COG1134@1|root,COG1134@2|Bacteria,1MWWC@1224|Proteobacteria,1RN2T@1236|Gammaproteobacteria,1YHWG@136841|Pseudomonas aeruginosa group	1236|Gammaproteobacteria	GM	Wzt C-terminal domain	-	-	-	ko:K09691	ko02010,map02010	M00250	-	-	ko00000,ko00001,ko00002,ko02000	3.A.1.103	-	-	ABC_tran,Wzt_C
PALA8_03892	287.DR97_638	2.78e-267	732.0	COG0438@1|root,COG0438@2|Bacteria,1N0DG@1224|Proteobacteria,1S0D6@1236|Gammaproteobacteria,1YIXT@136841|Pseudomonas aeruginosa group	1236|Gammaproteobacteria	M	Glycosyl transferases group 1	-	-	-	ko:K13004,ko:K21011	ko02025,map02025	-	-	-	ko00000,ko00001,ko01000,ko01003,ko01005	-	GT4	-	Glyco_trans_4_2,Glycos_transf_1
PALA8_03893	287.DR97_639	4.77e-247	677.0	COG1087@1|root,COG1087@2|Bacteria,1MUHI@1224|Proteobacteria,1RMTU@1236|Gammaproteobacteria,1YDX3@136841|Pseudomonas aeruginosa group	1236|Gammaproteobacteria	M	GDP-mannose 4,6 dehydratase	galE	-	5.1.3.2	ko:K01784	ko00052,ko00520,ko01100,map00052,map00520,map01100	M00361,M00362,M00632	R00291,R02984	RC00289	ko00000,ko00001,ko00002,ko01000	-	-	-	Epimerase,GDP_Man_Dehyd
PALA8_03900	287.DR97_3208	5.83e-71	221.0	2EMUA@1|root,33FGN@2|Bacteria,1R7BJ@1224|Proteobacteria	1224|Proteobacteria	S	Suppressor of fused protein (SUFU)	-	-	-	-	-	-	-	-	-	-	-	-	SUFU
PALA8_03907	296591.Bpro_3443	3.28e-61	202.0	COG1538@1|root,COG1538@2|Bacteria,1MUA8@1224|Proteobacteria,2VJ1B@28216|Betaproteobacteria,4AD63@80864|Comamonadaceae	28216|Betaproteobacteria	M	TIGRFAM RND efflux system, outer membrane lipoprotein, NodT	-	-	-	-	-	-	-	-	-	-	-	-	OEP
PALA8_03908	1169143.KB911049_gene5557	1.33e-103	304.0	COG1309@1|root,COG1309@2|Bacteria,1PZUN@1224|Proteobacteria,2VMCQ@28216|Betaproteobacteria,1K2EE@119060|Burkholderiaceae	28216|Betaproteobacteria	K	regulatory protein TetR	ameR	-	-	-	-	-	-	-	-	-	-	-	TetR_N
PALA8_03909	223283.PSPTO_0821	1.31e-171	489.0	COG0845@1|root,COG0845@2|Bacteria,1NJDF@1224|Proteobacteria,1RXZ3@1236|Gammaproteobacteria,1Z7AV@136849|Pseudomonas syringae group	1236|Gammaproteobacteria	M	Belongs to the membrane fusion protein (MFP) (TC 8.A.1) family	-	-	-	-	-	-	-	-	-	-	-	-	Biotin_lipoyl_2,HlyD_3,HlyD_D23
PALA8_03910	1005048.CFU_2061	0.0	1724.0	COG0841@1|root,COG0841@2|Bacteria,1MU48@1224|Proteobacteria,2VHZQ@28216|Betaproteobacteria,475TC@75682|Oxalobacteraceae	28216|Betaproteobacteria	V	AcrB/AcrD/AcrF family	-	-	-	-	-	-	-	-	-	-	-	-	ACR_tran
PALA8_03911	859657.RPSI07_1606	1.27e-141	405.0	COG1028@1|root,COG1028@2|Bacteria,1MUCH@1224|Proteobacteria,2VN02@28216|Betaproteobacteria,1K3YW@119060|Burkholderiaceae	28216|Betaproteobacteria	IQ	Belongs to the short-chain dehydrogenases reductases (SDR) family	-	-	-	-	-	-	-	-	-	-	-	-	adh_short
PALA8_03912	1408224.SAMCCGM7_c2096	1.89e-100	292.0	COG2020@1|root,COG2020@2|Bacteria,1MZ7S@1224|Proteobacteria,2UBYC@28211|Alphaproteobacteria,4BC19@82115|Rhizobiaceae	28211|Alphaproteobacteria	O	Phospholipid methyltransferase	-	-	-	-	-	-	-	-	-	-	-	-	PEMT
PALA8_03913	388051.AUFE01000053_gene4971	1.18e-195	544.0	COG0492@1|root,COG0492@2|Bacteria,1MVWS@1224|Proteobacteria,2VJ2R@28216|Betaproteobacteria,1K3YI@119060|Burkholderiaceae	28216|Betaproteobacteria	O	Pyridine nucleotide-disulphide oxidoreductase	-	-	-	-	-	-	-	-	-	-	-	-	Pyr_redox_2
PALA8_03914	318996.AXAZ01000034_gene6712	4.48e-119	344.0	COG1309@1|root,COG1309@2|Bacteria,1PEAK@1224|Proteobacteria,2U2RQ@28211|Alphaproteobacteria,3JWZF@41294|Bradyrhizobiaceae	28211|Alphaproteobacteria	K	AefR-like transcriptional repressor, C-terminal region	-	-	-	ko:K18301	-	M00642	-	-	ko00000,ko00002,ko01504,ko03000	-	-	-	TetR_C_7,TetR_N
PALA8_03967	287.DR97_480	9.78e-89	260.0	COG4460@1|root,COG4460@2|Bacteria,1N01C@1224|Proteobacteria,1S6PR@1236|Gammaproteobacteria	1236|Gammaproteobacteria	S	protein conserved in bacteria	-	-	-	-	-	-	-	-	-	-	-	-	DUF4440
PALA8_03979	287.DR97_492	3.09e-237	672.0	COG1629@1|root,COG1629@2|Bacteria,1NI9R@1224|Proteobacteria,1RS0I@1236|Gammaproteobacteria,1YFQ5@136841|Pseudomonas aeruginosa group	1236|Gammaproteobacteria	P	Secretin and TonB N terminus short domain	tdhA	GO:0005575,GO:0005623,GO:0009279,GO:0016020,GO:0019867,GO:0030312,GO:0030313,GO:0031975,GO:0044462,GO:0044464,GO:0071944	-	ko:K16087	-	-	-	-	ko00000,ko02000	1.B.14.2	-	-	Plug,STN,TonB_dep_Rec
PALA8_03994	287.DR97_647	8.97e-312	848.0	COG2067@1|root,COG2067@2|Bacteria,1MUU4@1224|Proteobacteria,1RQZJ@1236|Gammaproteobacteria,1YD3I@136841|Pseudomonas aeruginosa group	1236|Gammaproteobacteria	I	Outer membrane protein transport protein (OMPP1/FadL/TodX)	fadL	-	-	ko:K06076	-	-	-	-	ko00000,ko02000	1.B.9	-	-	Toluene_X
PALA8_04060	1453503.AU05_03620	4.21e-204	572.0	COG2957@1|root,COG2957@2|Bacteria,1MX65@1224|Proteobacteria,1RMF1@1236|Gammaproteobacteria,1YF6F@136841|Pseudomonas aeruginosa group	1236|Gammaproteobacteria	E	Porphyromonas-type peptidyl-arginine deiminase	-	-	3.5.3.12	ko:K10536	ko00330,ko01100,map00330,map01100	-	R01416	RC00177	ko00000,ko00001,ko01000	-	-	-	PAD_porph
PALA8_04061	1301098.PKB_2581	4.98e-203	569.0	COG0687@1|root,COG0687@2|Bacteria,1MUYW@1224|Proteobacteria,1RM7W@1236|Gammaproteobacteria	1236|Gammaproteobacteria	P	Required for the activity of the bacterial periplasmic transport system of putrescine	potF	-	-	ko:K11073	ko02010,map02010	M00300	-	-	ko00000,ko00001,ko00002,ko02000	3.A.1.11.2	-	-	SBP_bac_8
PALA8_04062	1245471.PCA10_13630	4.79e-173	488.0	COG0388@1|root,COG0388@2|Bacteria,1MXG5@1224|Proteobacteria,1RP7S@1236|Gammaproteobacteria,1YCZX@136841|Pseudomonas aeruginosa group	1236|Gammaproteobacteria	S	Carbon-nitrogen hydrolase	aguB	-	3.5.1.53	ko:K12251	ko00330,ko01100,map00330,map01100	-	R01152	RC00096	ko00000,ko00001,ko01000	-	-	-	CN_hydrolase
PALA8_04063	1294143.H681_14175	4.62e-207	577.0	COG2957@1|root,COG2957@2|Bacteria,1MX65@1224|Proteobacteria,1RMF1@1236|Gammaproteobacteria	1236|Gammaproteobacteria	E	Mediates the hydrolysis of agmatine into N- carbamoylputrescine in the arginine decarboxylase (ADC) pathway of putrescine biosynthesis, a basic polyamine	aguA	-	3.5.3.12	ko:K10536	ko00330,ko01100,map00330,map01100	-	R01416	RC00177	ko00000,ko00001,ko01000	-	-	-	PAD_porph
PALA8_04064	1245471.PCA10_13610	2.54e-175	493.0	COG0583@1|root,COG0583@2|Bacteria,1R4RN@1224|Proteobacteria,1S0QN@1236|Gammaproteobacteria,1YETQ@136841|Pseudomonas aeruginosa group	1236|Gammaproteobacteria	K	LysR substrate binding domain	-	-	-	ko:K03566	ko02026,map02026	-	-	-	ko00000,ko00001,ko03000	-	-	-	HTH_1,LysR_substrate
PALA8_04067	287.DR97_713	0.0	1006.0	COG1020@1|root,COG1020@2|Bacteria,1QK4F@1224|Proteobacteria	1224|Proteobacteria	Q	Non-ribosomal peptide synthetase modules and related proteins	-	-	6.2.1.46	ko:K15646	-	-	R11084	RC00039,RC00137	ko00000,ko01000,ko01008	-	-	-	AMP-binding,AMP-binding_C,Condensation,PP-binding,Thioesterase
PALA8_04136	287.DR97_1161	3.61e-180	502.0	COG2801@1|root,COG2801@2|Bacteria,1MVXQ@1224|Proteobacteria,1RPEW@1236|Gammaproteobacteria,1YJPN@136841|Pseudomonas aeruginosa group	1236|Gammaproteobacteria	L	HTH-like domain	-	-	-	ko:K07497	-	-	-	-	ko00000	-	-	-	HTH_21,rve
PALA8_04137	287.DR97_784	2.7e-57	211.0	COG4104@1|root,COG4104@2|Bacteria,1PDQ0@1224|Proteobacteria,1RWKS@1236|Gammaproteobacteria,1YJWQ@136841|Pseudomonas aeruginosa group	1236|Gammaproteobacteria	S	S-type Pyocin	-	-	-	-	-	-	-	-	-	-	-	-	Pyocin_S
PALA8_04190	287.DR97_837	2.14e-65	199.0	COG1677@1|root,COG1677@2|Bacteria,1N6RZ@1224|Proteobacteria,1SD52@1236|Gammaproteobacteria,1YGGK@136841|Pseudomonas aeruginosa group	1236|Gammaproteobacteria	N	Flagellar hook-basal body complex protein FliE	fliE	-	-	ko:K02408	ko02040,map02040	-	-	-	ko00000,ko00001,ko02035	-	-	-	FliE
PALA8_04194	287.DR97_841	5.58e-60	185.0	2DWYM@1|root,342JD@2|Bacteria,1QEEB@1224|Proteobacteria,1TB2J@1236|Gammaproteobacteria,1YGWF@136841|Pseudomonas aeruginosa group	1236|Gammaproteobacteria	S	Flagellar protein FliT	-	-	-	-	-	-	-	-	-	-	-	-	FliT
PALA8_04195	287.DR97_842	2.94e-80	238.0	COG1516@1|root,COG1516@2|Bacteria,1MZ3G@1224|Proteobacteria,1S8TQ@1236|Gammaproteobacteria,1YGJ8@136841|Pseudomonas aeruginosa group	1236|Gammaproteobacteria	N	flagellar protein FliS	fliS	-	-	ko:K02422	ko02040,map02040	-	-	-	ko00000,ko00001,ko02035	-	-	-	FliS
PALA8_04196	287.DR97_843	7.34e-86	253.0	COG1516@1|root,COG1516@2|Bacteria,1QEA5@1224|Proteobacteria,1TAUS@1236|Gammaproteobacteria,1YGKA@136841|Pseudomonas aeruginosa group	1236|Gammaproteobacteria	N	Flagellar protein FliS	-	-	-	ko:K02422	ko02040,map02040	-	-	-	ko00000,ko00001,ko02035	-	-	-	FliS
PALA8_04197	287.DR97_844	0.0	879.0	COG1345@1|root,COG1345@2|Bacteria,1MUVP@1224|Proteobacteria,1RS2S@1236|Gammaproteobacteria,1YE11@136841|Pseudomonas aeruginosa group	1236|Gammaproteobacteria	N	morphogenesis and for the elongation of the flagellar filament by facilitating polymerization of the flagellin monomers at the tip of growing filament. Forms a capping structure, which prevents flagellin subunits (transported through the central channel of the flagellum) from leaking out without polymerization at the distal end	fliD	GO:0005575,GO:0005576,GO:0005623,GO:0009288,GO:0042995,GO:0043226,GO:0043228,GO:0044464	-	ko:K02407	ko02040,map02040	-	-	-	ko00000,ko00001,ko02035	-	-	-	Flagellin_IN,FliD_C,FliD_N
PALA8_04198	287.DR97_845	1.28e-75	227.0	COG1334@1|root,COG1334@2|Bacteria,1NH9T@1224|Proteobacteria,1SH7I@1236|Gammaproteobacteria,1YH2R@136841|Pseudomonas aeruginosa group	1236|Gammaproteobacteria	N	FlaG protein	flaG	-	-	ko:K06603	-	-	-	-	ko00000,ko02035	-	-	-	FlaG
PALA8_04199	287.DR97_846	1.4e-227	633.0	COG1344@1|root,COG1344@2|Bacteria,1MV1N@1224|Proteobacteria,1RN0Y@1236|Gammaproteobacteria,1YE19@136841|Pseudomonas aeruginosa group	1236|Gammaproteobacteria	N	Flagellin is the subunit protein which polymerizes to form the filaments of bacterial flagella	fliC	GO:0005575,GO:0005576,GO:0005623,GO:0009288,GO:0042995,GO:0043226,GO:0043228,GO:0044464	-	ko:K02406	ko02020,ko02040,ko04621,ko04626,ko05132,ko05134,map02020,map02040,map04621,map04626,map05132,map05134	-	-	-	ko00000,ko00001,ko02035	-	-	-	Flagellin_C,Flagellin_IN,Flagellin_N
PALA8_04200	287.DR97_847	0.0	2315.0	COG0463@1|root,COG1216@1|root,COG0463@2|Bacteria,COG1216@2|Bacteria,1MX5Z@1224|Proteobacteria,1RMDY@1236|Gammaproteobacteria,1YERI@136841|Pseudomonas aeruginosa group	1236|Gammaproteobacteria	M	Glycosyl transferase family 2	-	-	-	ko:K20444	-	-	-	-	ko00000,ko01000,ko01005,ko02000	4.D.1.3	GT2,GT4	-	Glycos_transf_2,Glyphos_transf,Methyltransf_23,Methyltransf_31
PALA8_04201	287.DR97_848	1.02e-282	771.0	COG1086@1|root,COG1086@2|Bacteria,1PJJY@1224|Proteobacteria,1TCBI@1236|Gammaproteobacteria,1YK5C@136841|Pseudomonas aeruginosa group	1236|Gammaproteobacteria	GM	Methyltransferase FkbM domain	-	-	-	-	-	-	-	-	-	-	-	-	Methyltransf_21
PALA8_04202	287.DR97_849	4.16e-136	386.0	COG1044@1|root,COG1044@2|Bacteria,1RAGM@1224|Proteobacteria,1SN6N@1236|Gammaproteobacteria	1236|Gammaproteobacteria	M	Bacterial transferase hexapeptide (six repeats)	-	-	-	-	-	-	-	-	-	-	-	-	Hexapep
PALA8_04203	287.DR97_850	1.99e-286	780.0	COG4638@1|root,COG4638@2|Bacteria,1MWXW@1224|Proteobacteria,1S02J@1236|Gammaproteobacteria,1YHCN@136841|Pseudomonas aeruginosa group	1236|Gammaproteobacteria	P	Ring hydroxylating alpha subunit (catalytic domain)	-	-	1.14.15.7	ko:K00499	ko00260,map00260	-	R07409	RC00087	ko00000,ko00001,ko01000	-	-	-	Rieske,Ring_hydroxyl_A
PALA8_04204	287.DR97_851	1.52e-95	284.0	COG0110@1|root,COG0110@2|Bacteria,1MZ7U@1224|Proteobacteria,1S3R7@1236|Gammaproteobacteria	1236|Gammaproteobacteria	S	COG0110 Acetyltransferase (isoleucine patch superfamily)	-	-	-	-	-	-	-	-	-	-	-	-	Hexapep
PALA8_04205	287.DR97_852	7.94e-173	483.0	COG1028@1|root,COG1028@2|Bacteria,1R78Q@1224|Proteobacteria	1224|Proteobacteria	IQ	Enoyl-(Acyl carrier protein) reductase	-	-	-	-	-	-	-	-	-	-	-	-	adh_short_C2
PALA8_04206	287.DR97_853	5.64e-255	698.0	COG0332@1|root,COG0332@2|Bacteria,1MU9N@1224|Proteobacteria,1RNIR@1236|Gammaproteobacteria,1YJI3@136841|Pseudomonas aeruginosa group	1236|Gammaproteobacteria	I	3-Oxoacyl-[acyl-carrier-protein (ACP)] synthase III	-	-	2.3.1.180	ko:K00648	ko00061,ko01100,ko01212,map00061,map01100,map01212	M00082,M00083	R10707	RC00004,RC02729,RC02888	ko00000,ko00001,ko00002,ko01000,ko01004	-	-	-	ACP_syn_III,ACP_syn_III_C
PALA8_04207	287.DR97_854	1.17e-46	149.0	COG0236@1|root,COG0236@2|Bacteria,1N8AP@1224|Proteobacteria,1SS9V@1236|Gammaproteobacteria	1236|Gammaproteobacteria	IQ	acyl carrier protein	-	-	-	-	-	-	-	-	-	-	-	-	PP-binding
PALA8_04208	287.DR97_855	4.64e-277	757.0	COG0399@1|root,COG0399@2|Bacteria,1MUPN@1224|Proteobacteria,1RQ7S@1236|Gammaproteobacteria,1YDDM@136841|Pseudomonas aeruginosa group	1236|Gammaproteobacteria	E	DegT/DnrJ/EryC1/StrS aminotransferase family	vioA	-	2.6.1.33	ko:K20429	-	-	R02773	RC00006,RC00781	ko00000,ko01000	-	-	-	DegT_DnrJ_EryC1
PALA8_04209	287.DR97_856	2.76e-306	835.0	COG1344@1|root,COG1344@2|Bacteria,1PJUJ@1224|Proteobacteria,1RPNR@1236|Gammaproteobacteria,1YCS1@136841|Pseudomonas aeruginosa group	1236|Gammaproteobacteria	N	Bacterial flagellin N-terminal helical region	flgL	-	-	ko:K02397	ko02040,map02040	-	-	-	ko00000,ko00001,ko02035	-	-	-	Flagellin_C,Flagellin_N
PALA8_04210	287.DR97_857	0.0	1293.0	COG1256@1|root,COG1256@2|Bacteria,1MV2M@1224|Proteobacteria,1RMEA@1236|Gammaproteobacteria,1YE8F@136841|Pseudomonas aeruginosa group	1236|Gammaproteobacteria	N	Belongs to the flagella basal body rod proteins family	flgK	-	-	ko:K02396	ko02040,map02040	-	-	-	ko00000,ko00001,ko02035	-	-	-	Flg_bb_rod,Flg_bbr_C
PALA8_04308	287.DR97_954	1.73e-158	445.0	COG3121@1|root,COG3121@2|Bacteria,1R5FY@1224|Proteobacteria,1S54E@1236|Gammaproteobacteria,1YIPP@136841|Pseudomonas aeruginosa group	1236|Gammaproteobacteria	M	Pili assembly chaperone PapD, C-terminal domain	-	-	-	-	-	-	-	-	-	-	-	-	PapD_C,PapD_N
PALA8_04309	287.DR97_955	1.83e-114	331.0	COG3539@1|root,COG3539@2|Bacteria,1QDWB@1224|Proteobacteria,1TC0W@1236|Gammaproteobacteria,1YJMW@136841|Pseudomonas aeruginosa group	1236|Gammaproteobacteria	NU	Fimbrial protein	-	-	-	-	-	-	-	-	-	-	-	-	Fimbrial
PALA8_04311	287.DR97_957	3.52e-161	452.0	COG1051@1|root,COG1051@2|Bacteria,1RH0I@1224|Proteobacteria,1S60P@1236|Gammaproteobacteria	1236|Gammaproteobacteria	F	DNA mismatch repair protein MutT	mutT_1	-	3.6.1.55	ko:K03574	-	-	-	-	ko00000,ko01000,ko03400	-	-	-	NUDIX,Nudix_N
PALA8_04312	287.DR97_958	7.98e-132	374.0	2AS55@1|root,31HHZ@2|Bacteria,1QF8M@1224|Proteobacteria,1TCDH@1236|Gammaproteobacteria,1YK7S@136841|Pseudomonas aeruginosa group	1236|Gammaproteobacteria	-	-	-	-	-	-	-	-	-	-	-	-	-	-	-
PALA8_04314	291112.PAU_01043	2.28e-218	633.0	COG1752@1|root,COG1752@2|Bacteria,1NDS9@1224|Proteobacteria,1SEP9@1236|Gammaproteobacteria	1236|Gammaproteobacteria	S	Patatin-like phospholipase	-	-	-	ko:K15477,ko:K16638	ko05134,map05134	-	-	-	ko00000,ko00001,ko02042	-	-	-	Patatin
PALA8_04315	287.DR97_1131	1.06e-74	231.0	COG2801@1|root,COG2801@2|Bacteria,1MVN5@1224|Proteobacteria,1RR8F@1236|Gammaproteobacteria,1YH5U@136841|Pseudomonas aeruginosa group	1236|Gammaproteobacteria	L	Integrase core domain	-	-	-	ko:K07497	-	-	-	-	ko00000	-	-	-	HTH_21,rve,rve_3
PALA8_04316	287.DR97_1723	1.81e-194	540.0	COG1192@1|root,COG1192@2|Bacteria,1R473@1224|Proteobacteria,1RMSC@1236|Gammaproteobacteria,1YCUR@136841|Pseudomonas aeruginosa group	1236|Gammaproteobacteria	D	Cellulose biosynthesis protein BcsQ	-	-	-	ko:K12055	-	-	-	-	ko00000,ko02044	3.A.7.11.1	-	-	AAA_31
PALA8_04317	287.DR97_1724	1.14e-151	429.0	2BFVF@1|root,329QS@2|Bacteria,1QF5R@1224|Proteobacteria,1TC8V@1236|Gammaproteobacteria,1YK2J@136841|Pseudomonas aeruginosa group	1236|Gammaproteobacteria	-	-	-	-	-	-	-	-	-	-	-	-	-	-	-
PALA8_04319	287.DR97_1726	5.49e-108	318.0	2EFVP@1|root,331HM@2|Bacteria,1NCV1@1224|Proteobacteria,1TCH2@1236|Gammaproteobacteria,1YKBR@136841|Pseudomonas aeruginosa group	1236|Gammaproteobacteria	-	-	-	-	-	-	-	-	-	-	-	-	-	-	-
PALA8_04320	287.DR97_1727	1.81e-121	351.0	2DPEC@1|root,331RJ@2|Bacteria,1N7D6@1224|Proteobacteria,1SG44@1236|Gammaproteobacteria	1236|Gammaproteobacteria	-	-	-	-	-	-	-	-	-	-	-	-	-	-	-
PALA8_04321	1395571.TMS3_0120310	1.63e-89	270.0	2CPPK@1|root,32SJJ@2|Bacteria,1MZQ2@1224|Proteobacteria,1SABH@1236|Gammaproteobacteria	1236|Gammaproteobacteria	S	Protein of unknown function (DUF2786)	-	-	-	-	-	-	-	-	-	-	-	-	DUF2786
PALA8_04322	287.DR97_1729	1.98e-54	176.0	2DMKC@1|root,32S64@2|Bacteria,1N3QF@1224|Proteobacteria,1S8NZ@1236|Gammaproteobacteria,1YJS2@136841|Pseudomonas aeruginosa group	1236|Gammaproteobacteria	S	HNH endonuclease	-	-	-	-	-	-	-	-	-	-	-	-	HNH_3
PALA8_04323	287.DR97_1730	1.12e-37	127.0	2EMS1@1|root,33FEG@2|Bacteria,1NNKZ@1224|Proteobacteria,1STN8@1236|Gammaproteobacteria,1YK5F@136841|Pseudomonas aeruginosa group	1236|Gammaproteobacteria	-	-	-	-	-	-	-	-	-	-	-	-	-	-	-
PALA8_04324	287.DR97_1731	4.75e-303	828.0	COG0305@1|root,COG0305@2|Bacteria,1MUG9@1224|Proteobacteria,1RPM2@1236|Gammaproteobacteria,1YE3F@136841|Pseudomonas aeruginosa group	1236|Gammaproteobacteria	L	it exhibits DNA-dependent ATPase activity and contains distinct active sites for ATP binding, DNA binding, and interaction with DnaC protein, primase, and other prepriming proteins	dnaB	GO:0003674,GO:0003678,GO:0003824,GO:0004386,GO:0005488,GO:0005515,GO:0005575,GO:0005622,GO:0005623,GO:0005737,GO:0005829,GO:0006139,GO:0006259,GO:0006260,GO:0006261,GO:0006268,GO:0006725,GO:0006807,GO:0006996,GO:0008150,GO:0008152,GO:0009058,GO:0009059,GO:0009314,GO:0009628,GO:0009987,GO:0010212,GO:0016043,GO:0016462,GO:0016787,GO:0016817,GO:0016818,GO:0017111,GO:0032392,GO:0032508,GO:0034641,GO:…	3.6.4.12	ko:K02314	ko03030,ko04112,map03030,map04112	-	-	-	ko00000,ko00001,ko01000,ko03032	-	-	-	DnaB,DnaB_C
PALA8_04326	1388763.O165_001830	2.45e-46	156.0	2AYFN@1|root,31QIW@2|Bacteria,1QN5J@1224|Proteobacteria,1TKKF@1236|Gammaproteobacteria,1YX1F@136845|Pseudomonas putida group	1236|Gammaproteobacteria	-	-	-	-	-	-	-	-	-	-	-	-	-	-	-
PALA8_04329	1149133.ppKF707_2809	2.96e-19	80.9	2DEPZ@1|root,32U3U@2|Bacteria,1N05I@1224|Proteobacteria,1ST6A@1236|Gammaproteobacteria,1YH8A@136841|Pseudomonas aeruginosa group	1236|Gammaproteobacteria	-	-	-	-	-	-	-	-	-	-	-	-	-	-	-
PALA8_04330	287.DR97_4017	1.2e-235	649.0	COG3081@1|root,COG3081@2|Bacteria,1NXJU@1224|Proteobacteria,1RP8N@1236|Gammaproteobacteria,1YCUH@136841|Pseudomonas aeruginosa group	1236|Gammaproteobacteria	S	37-kD nucleoid-associated bacterial protein	ndpA	-	-	ko:K06899	-	-	-	-	ko00000,ko03036	-	-	-	NA37
PALA8_04332	287.DR97_1741	0.0	953.0	COG1475@1|root,COG1475@2|Bacteria,1P9JB@1224|Proteobacteria,1RS4J@1236|Gammaproteobacteria	1236|Gammaproteobacteria	K	transcriptional regulators	-	-	-	-	-	-	-	-	-	-	-	-	Arg_repressor,ParBc
PALA8_04333	287.DR97_1742	7.79e-148	420.0	2DBEY@1|root,2Z8VH@2|Bacteria,1R57M@1224|Proteobacteria,1S0ZQ@1236|Gammaproteobacteria,1YDR2@136841|Pseudomonas aeruginosa group	1236|Gammaproteobacteria	S	Protein of unknown function (DUF2857)	-	-	-	-	-	-	-	-	-	-	-	-	DUF2857
PALA8_04334	287.DR97_1743	5.38e-304	830.0	2DB84@1|root,2Z7Q1@2|Bacteria,1QCBR@1224|Proteobacteria,1RPC9@1236|Gammaproteobacteria	1236|Gammaproteobacteria	-	-	-	-	-	-	-	-	-	-	-	-	-	-	-
PALA8_04336	287.DR97_1746	9.76e-172	479.0	28IN9@1|root,2Z8NN@2|Bacteria,1MZG1@1224|Proteobacteria,1RRMR@1236|Gammaproteobacteria	1236|Gammaproteobacteria	S	Integrating conjugative element protein	-	-	-	-	-	-	-	-	-	-	-	-	DUF1845
PALA8_04337	287.DR97_1747	4.82e-39	134.0	28HW1@1|root,2Z824@2|Bacteria,1MXVS@1224|Proteobacteria,1S2SC@1236|Gammaproteobacteria	1236|Gammaproteobacteria	S	Protein of unknown function (DUF3158)	-	-	-	-	-	-	-	-	-	-	-	-	DUF3158
PALA8_04338	287.DR97_1749	8.96e-106	305.0	COG0629@1|root,COG0629@2|Bacteria,1R8ED@1224|Proteobacteria,1S586@1236|Gammaproteobacteria,1YJG4@136841|Pseudomonas aeruginosa group	1236|Gammaproteobacteria	L	Single-strand binding protein family	-	-	-	ko:K03111	ko03030,ko03430,ko03440,map03030,map03430,map03440	-	-	-	ko00000,ko00001,ko03029,ko03032,ko03400	-	-	-	SSB
PALA8_04341	1112217.PPL19_07856	6.11e-78	233.0	COG1487@1|root,COG1487@2|Bacteria,1MZB6@1224|Proteobacteria,1S4JD@1236|Gammaproteobacteria	1236|Gammaproteobacteria	S	Toxic component of a toxin-antitoxin (TA) module. An RNase	vapC	-	-	ko:K18828	-	-	-	-	ko00000,ko01000,ko02048,ko03016	-	-	-	PIN
PALA8_04342	287.DR97_1750	0.0	1234.0	COG0550@1|root,COG0550@2|Bacteria,1MUFZ@1224|Proteobacteria,1RXXC@1236|Gammaproteobacteria,1YITW@136841|Pseudomonas aeruginosa group	1236|Gammaproteobacteria	G	Releases the supercoiling and torsional tension of DNA, which is introduced during the DNA replication and transcription, by transiently cleaving and rejoining one strand of the DNA duplex. Introduces a single-strand break via transesterification at a target site in duplex DNA. The scissile phosphodiester is attacked by the catalytic tyrosine of the enzyme, resulting in the formation of a DNA-(5'…	-	-	5.99.1.2	ko:K03168	-	-	-	-	ko00000,ko01000,ko03032,ko03400	-	-	-	Topoisom_bac,Toprim,zf-C4_Topoisom
PALA8_04344	1380387.JADM01000034_gene1737	6.03e-62	199.0	2AKQH@1|root,31BH8@2|Bacteria,1RIRI@1224|Proteobacteria,1SMND@1236|Gammaproteobacteria	1236|Gammaproteobacteria	-	-	-	-	-	-	-	-	-	-	-	-	-	-	-
PALA8_04345	1294143.H681_06280	1.05e-123	354.0	COG1280@1|root,COG1280@2|Bacteria,1MXAI@1224|Proteobacteria,1RPWN@1236|Gammaproteobacteria	1236|Gammaproteobacteria	E	efflux protein	-	-	-	ko:K05834	-	-	-	-	ko00000,ko02000	2.A.76.1.1	-	-	LysE
PALA8_04346	1294143.H681_06285	1.86e-188	525.0	COG0583@1|root,COG0583@2|Bacteria,1PR6U@1224|Proteobacteria,1RQ7J@1236|Gammaproteobacteria	1236|Gammaproteobacteria	K	Transcriptional regulator	-	-	-	-	-	-	-	-	-	-	-	-	HTH_1,LysR_substrate
PALA8_04347	1415630.U771_05000	1.01e-130	399.0	29BQY@1|root,2ZYPA@2|Bacteria,1NMUV@1224|Proteobacteria	1224|Proteobacteria	-	-	-	-	-	-	-	-	-	-	-	-	-	-	PcfJ
PALA8_04348	287.DR97_1753	0.0	1236.0	COG0553@1|root,COG0553@2|Bacteria,1MV6M@1224|Proteobacteria,1RQ34@1236|Gammaproteobacteria,1YJEN@136841|Pseudomonas aeruginosa group	1236|Gammaproteobacteria	KL	SNF2 family N-terminal domain	-	-	-	-	-	-	-	-	-	-	-	-	Helicase_C,Mrr_cat,SNF2_N,SWIM
PALA8_04349	287.DR97_1756	1.79e-223	621.0	COG3266@1|root,COG3266@2|Bacteria,1MXMF@1224|Proteobacteria,1S46X@1236|Gammaproteobacteria,1YEHP@136841|Pseudomonas aeruginosa group	1236|Gammaproteobacteria	S	Integrating conjugative element protein PilL	-	-	-	ko:K02487	ko02020,map02020	M00507	-	-	ko00000,ko00001,ko00002,ko02022,ko02035	-	-	-	-
PALA8_04350	287.DR97_1757	0.0	1049.0	COG1450@1|root,COG1450@2|Bacteria,1NQ25@1224|Proteobacteria,1S00D@1236|Gammaproteobacteria,1YH8R@136841|Pseudomonas aeruginosa group	1236|Gammaproteobacteria	NU	Bacterial type II and III secretion system protein	pilN	-	-	-	-	-	-	-	-	-	-	-	Secretin,Secretin_N_2
PALA8_04351	287.DR97_1758	4.32e-314	856.0	28JMG@1|root,2Z9DZ@2|Bacteria,1R9AT@1224|Proteobacteria,1RX3K@1236|Gammaproteobacteria	1236|Gammaproteobacteria	S	Pilin accessory protein (PilO)	pilO	-	-	-	-	-	-	-	-	-	-	-	PAP_PilO
PALA8_04352	287.DR97_1759	1.61e-113	327.0	2EFP8@1|root,339F9@2|Bacteria,1NFEA@1224|Proteobacteria,1SVD3@1236|Gammaproteobacteria	1236|Gammaproteobacteria	-	-	-	-	-	-	-	-	-	-	-	-	-	-	-
PALA8_04353	287.DR97_1760	0.0	1041.0	COG2804@1|root,COG2804@2|Bacteria,1R9U0@1224|Proteobacteria,1RSBE@1236|Gammaproteobacteria,1YHM0@136841|Pseudomonas aeruginosa group	1236|Gammaproteobacteria	NU	Type II/IV secretion system protein	pilQ	-	-	-	-	-	-	-	-	-	-	-	T2SSE
PALA8_04354	287.DR97_1761	1.17e-249	686.0	COG1459@1|root,COG1459@2|Bacteria,1RAQ3@1224|Proteobacteria,1RQQ4@1236|Gammaproteobacteria,1YIBY@136841|Pseudomonas aeruginosa group	1236|Gammaproteobacteria	NU	Type II secretion system (T2SS), protein F	pilR	-	-	ko:K10934	ko05110,ko05111,map05110,map05111	-	-	-	ko00000,ko00001,ko02044	-	-	-	T2SSF
PALA8_04355	287.DR97_1762	8.9e-90	266.0	2A8ED@1|root,30XG6@2|Bacteria,1PJBG@1224|Proteobacteria,1TCC0@1236|Gammaproteobacteria,1YK5Y@136841|Pseudomonas aeruginosa group	1236|Gammaproteobacteria	S	PilS N terminal	-	-	-	-	-	-	-	-	-	-	-	-	N_methyl,PilS
PALA8_04356	287.DR97_1763	8.23e-180	506.0	COG2805@1|root,COG2805@2|Bacteria,1RGES@1224|Proteobacteria,1TC5K@1236|Gammaproteobacteria,1YJWP@136841|Pseudomonas aeruginosa group	1236|Gammaproteobacteria	NU	Type II/IV secretion system protein	-	-	-	-	-	-	-	-	-	-	-	-	T2SSE
PALA8_04357	287.DR97_1764	1.82e-199	566.0	COG2165@1|root,COG2165@2|Bacteria,1P5SN@1224|Proteobacteria,1RSQK@1236|Gammaproteobacteria,1YIFS@136841|Pseudomonas aeruginosa group	1236|Gammaproteobacteria	NU	Bacterial shufflon protein, N-terminal constant region	pilV	-	-	-	-	-	-	-	-	-	-	-	Shufflon_N
PALA8_04358	1395571.TMS3_0120490	9.38e-42	142.0	2DSIP@1|root,33GAT@2|Bacteria,1NKSA@1224|Proteobacteria	1224|Proteobacteria	S	PilM	-	-	-	-	-	-	-	-	-	-	-	-	PilM
PALA8_04359	629265.PMA4326_08665	5.33e-124	362.0	COG2378@1|root,COG2378@2|Bacteria,1MX81@1224|Proteobacteria,1T04Z@1236|Gammaproteobacteria	1236|Gammaproteobacteria	K	transcriptional regulator	-	-	-	-	-	-	-	-	-	-	-	-	WYL
PALA8_04360	571.MC52_00640	4.66e-185	525.0	COG2333@1|root,COG2333@2|Bacteria,1MXMG@1224|Proteobacteria,1RNV7@1236|Gammaproteobacteria	1236|Gammaproteobacteria	S	competence protein COMEC	-	-	-	-	-	-	-	-	-	-	-	-	-
PALA8_04361	571.MC52_00635	3.7e-259	742.0	COG0476@1|root,COG1310@1|root,COG0476@2|Bacteria,COG1310@2|Bacteria,1R3WR@1224|Proteobacteria,1RZ3R@1236|Gammaproteobacteria	1236|Gammaproteobacteria	H	Prokaryotic E2 family A	-	-	-	-	-	-	-	-	-	-	-	-	Prok-E2_A,Prok-JAB,ThiF
PALA8_04362	266265.Bxe_A0217	4.49e-169	482.0	COG2333@1|root,COG2333@2|Bacteria,1R739@1224|Proteobacteria,2VNXM@28216|Betaproteobacteria,1KDP9@119060|Burkholderiaceae	28216|Betaproteobacteria	S	competence protein COMEC	-	-	-	-	-	-	-	-	-	-	-	-	-
PALA8_04363	266265.Bxe_A0218	7.2e-72	229.0	28IC0@1|root,2Z8ED@2|Bacteria,1N0U2@1224|Proteobacteria,2VP3M@28216|Betaproteobacteria,1K9QS@119060|Burkholderiaceae	28216|Betaproteobacteria	-	-	-	-	-	-	-	-	-	-	-	-	-	-	-
PALA8_04364	629265.PMA4326_19278	4.01e-13	68.6	2AU56@1|root,31JRY@2|Bacteria,1QHIV@1224|Proteobacteria,1TF84@1236|Gammaproteobacteria,1ZAAM@136849|Pseudomonas syringae group	1236|Gammaproteobacteria	-	-	-	-	-	-	-	-	-	-	-	-	-	-	-
PALA8_04366	287.DR97_1769	5.78e-102	296.0	2DBKX@1|root,2Z9W9@2|Bacteria,1MX78@1224|Proteobacteria,1S1M6@1236|Gammaproteobacteria	1236|Gammaproteobacteria	S	Protein of unknown function (DUF3577)	-	-	-	-	-	-	-	-	-	-	-	-	DUF3577
PALA8_04368	287.DR97_1771	2.21e-38	128.0	2CUWF@1|root,335VM@2|Bacteria,1NCC3@1224|Proteobacteria,1T0XW@1236|Gammaproteobacteria	1236|Gammaproteobacteria	-	-	-	-	-	-	-	-	-	-	-	-	-	-	-
PALA8_04370	287.DR97_1772	2.84e-136	389.0	28IFG@1|root,2Z8H7@2|Bacteria,1P5PG@1224|Proteobacteria,1RQMA@1236|Gammaproteobacteria	1236|Gammaproteobacteria	S	ABC transporter substrate-binding protein	-	-	-	-	-	-	-	-	-	-	-	-	-
PALA8_04371	1388763.O165_001385	5.32e-28	105.0	2AYUK@1|root,31R00@2|Bacteria,1QNIT@1224|Proteobacteria,1TM50@1236|Gammaproteobacteria,1YZ16@136845|Pseudomonas putida group	1236|Gammaproteobacteria	-	-	-	-	-	-	-	-	-	-	-	-	-	-	-
PALA8_04372	287.DR97_1774	5.18e-133	379.0	28IYA@1|root,2Z8W2@2|Bacteria,1N3W9@1224|Proteobacteria,1T08H@1236|Gammaproteobacteria	1236|Gammaproteobacteria	S	Protein of unknown function (DUF3275)	-	-	-	-	-	-	-	-	-	-	-	-	DUF3275
PALA8_04374	1442599.JAAN01000014_gene3439	3.77e-32	116.0	28P2G@1|root,2ZBYJ@2|Bacteria,1RAD3@1224|Proteobacteria,1SBES@1236|Gammaproteobacteria,1X6B1@135614|Xanthomonadales	135614|Xanthomonadales	-	-	-	-	-	-	-	-	-	-	-	-	-	-	-
PALA8_04375	287.DR97_1777	9.16e-49	155.0	2AF4Q@1|root,3153E@2|Bacteria,1RH6Z@1224|Proteobacteria,1TCI4@1236|Gammaproteobacteria,1YKCK@136841|Pseudomonas aeruginosa group	1236|Gammaproteobacteria	-	-	-	-	-	-	-	-	-	-	-	-	-	-	-
PALA8_04376	287.DR97_1778	3.34e-145	409.0	28HAI@1|root,2Z7MW@2|Bacteria,1MX1B@1224|Proteobacteria,1S0R8@1236|Gammaproteobacteria	1236|Gammaproteobacteria	-	-	-	-	-	-	-	-	-	-	-	-	-	-	-
PALA8_04377	287.DR97_1779	0.0	938.0	COG0827@1|root,COG0827@2|Bacteria,1MWPP@1224|Proteobacteria,1SISR@1236|Gammaproteobacteria	1236|Gammaproteobacteria	L	DNA restriction-modification system	-	-	-	-	-	-	-	-	-	-	-	-	-
PALA8_04378	1388763.O165_001355	0.0	1389.0	COG0553@1|root,COG0553@2|Bacteria,1MXCE@1224|Proteobacteria,1RQR8@1236|Gammaproteobacteria	1236|Gammaproteobacteria	L	Superfamily II DNA RNA helicases, SNF2 family	-	-	5.99.1.2	ko:K03169	-	-	-	-	ko00000,ko01000,ko03032	-	-	-	Helicase_C,ResIII,SNF2_N
PALA8_04385	359.CN09_31800	1.66e-99	300.0	COG0583@1|root,COG0583@2|Bacteria,1MW16@1224|Proteobacteria,2U4B0@28211|Alphaproteobacteria,4BBC0@82115|Rhizobiaceae	28211|Alphaproteobacteria	K	LysR substrate binding domain	-	-	-	-	-	-	-	-	-	-	-	-	HTH_1,LysR_substrate
PALA8_04386	1419583.V466_11030	1.57e-150	446.0	COG0477@1|root,COG0477@2|Bacteria,1NZPP@1224|Proteobacteria,1T4V8@1236|Gammaproteobacteria,1YRZ5@136843|Pseudomonas fluorescens group	1236|Gammaproteobacteria	EGP	Arabinose ABC transporter permease	-	-	-	-	-	-	-	-	-	-	-	-	MFS_1
PALA8_04387	598467.BrE312_0537	1.22e-156	454.0	COG1566@1|root,COG1566@2|Bacteria,1MU7I@1224|Proteobacteria,1RMAD@1236|Gammaproteobacteria	1236|Gammaproteobacteria	V	multidrug resistance efflux pump	-	-	-	ko:K03543	-	M00701	-	-	ko00000,ko00002,ko02000	8.A.1.1	-	-	Biotin_lipoyl_2,HlyD_3,HlyD_D23
PALA8_04388	598467.BrE312_0538	7.62e-144	428.0	COG1538@1|root,COG1538@2|Bacteria,1MUZZ@1224|Proteobacteria,1RQEP@1236|Gammaproteobacteria	1236|Gammaproteobacteria	MU	RND efflux system, outer membrane lipoprotein	mdtP	-	-	-	-	-	-	-	-	-	-	-	OEP
PALA8_04389	1366050.N234_12125	3.73e-104	308.0	COG1741@1|root,COG1741@2|Bacteria,1RA1P@1224|Proteobacteria,2VKQQ@28216|Betaproteobacteria,1K9BN@119060|Burkholderiaceae	28216|Betaproteobacteria	S	Belongs to the pirin family	-	-	-	ko:K06911	-	-	-	-	ko00000	-	-	-	Pirin,Pirin_C
PALA8_04390	1123504.JQKD01000108_gene5212	1.45e-87	263.0	COG0625@1|root,COG0625@2|Bacteria,1MY47@1224|Proteobacteria,2VI89@28216|Betaproteobacteria,4AJ94@80864|Comamonadaceae	28216|Betaproteobacteria	O	Glutathione S-transferase, N-terminal domain	gst	-	2.5.1.18	ko:K00799	ko00480,ko00980,ko00982,ko00983,ko01524,ko05200,ko05204,ko05225,ko05418,map00480,map00980,map00982,map00983,map01524,map05200,map05204,map05225,map05418	-	R03522,R07002,R07003,R07004,R07023,R07024,R07025,R07026,R07069,R07070,R07083,R07084,R07091,R07092,R07093,R07094,R07100,R07113,R07116,R08280,R09409,R11905	RC00004,RC00069,RC00840,RC00948,RC01704,RC01705,RC01706,RC01758,RC01759,RC01765,RC01767,RC01769,RC02243,RC02527,RC02939,RC02940,RC02942,RC02943,RC02944	ko00000,ko00001,ko01000,ko02000	1.A.12.2.2,1.A.12.3.2	-	-	GST_C,GST_C_3,GST_N,GST_N_3
PALA8_04391	311403.Arad_7247	6.6e-145	415.0	COG0596@1|root,COG0596@2|Bacteria,1MUVB@1224|Proteobacteria,2TREP@28211|Alphaproteobacteria,4BCEX@82115|Rhizobiaceae	28211|Alphaproteobacteria	S	Alpha/beta hydrolase family	-	-	-	-	-	-	-	-	-	-	-	-	Abhydrolase_1
PALA8_04392	287.DR97_3675	0.0	969.0	COG0753@1|root,COG0753@2|Bacteria,1MUXZ@1224|Proteobacteria,1RNE7@1236|Gammaproteobacteria,1YEMH@136841|Pseudomonas aeruginosa group	1236|Gammaproteobacteria	P	Catalase	katA	GO:0000302,GO:0003674,GO:0003824,GO:0004096,GO:0004601,GO:0005488,GO:0005575,GO:0005622,GO:0005623,GO:0005737,GO:0006950,GO:0006979,GO:0008150,GO:0008152,GO:0009056,GO:0009636,GO:0009987,GO:0010035,GO:0016209,GO:0016491,GO:0016684,GO:0016999,GO:0017001,GO:0017144,GO:0020037,GO:0042221,GO:0042493,GO:0042542,GO:0042597,GO:0042737,GO:0042743,GO:0042744,GO:0044237,GO:0044248,GO:0044424,GO:0044464,GO:…	1.11.1.6	ko:K03781	ko00380,ko00630,ko01110,ko01130,ko01200,ko04011,ko04016,ko04068,ko04146,ko04211,ko04212,ko04213,ko05014,map00380,map00630,map01110,map01130,map01200,map04011,map04016,map04068,map04146,map04211,map04212,map04213,map05014	M00532	R00009,R00602,R02670	RC00034,RC00767,RC02141,RC02755	ko00000,ko00001,ko00002,ko01000	-	-	-	Catalase,Catalase-rel
PALA8_04394	32042.PstZobell_10539	1.01e-77	244.0	COG3039@1|root,COG3039@2|Bacteria,1MVDK@1224|Proteobacteria,1RR0T@1236|Gammaproteobacteria,1Z0T1@136846|Pseudomonas stutzeri group	1236|Gammaproteobacteria	L	COG3039 Transposase and inactivated derivatives, IS5 family	-	-	-	ko:K07481	-	-	-	-	ko00000	-	-	-	DDE_Tnp_1,DUF772
PALA8_04395	1395571.TMS3_0120570	4.03e-91	274.0	28I3M@1|root,2Z87B@2|Bacteria,1RKYZ@1224|Proteobacteria,1S61G@1236|Gammaproteobacteria	1236|Gammaproteobacteria	-	-	-	-	-	-	-	-	-	-	-	-	-	-	-
PALA8_04396	287.DR97_1789	3.33e-163	458.0	COG0695@1|root,COG0695@2|Bacteria,1MWE2@1224|Proteobacteria,1RRRQ@1236|Gammaproteobacteria	1236|Gammaproteobacteria	O	Integrating conjugative element protein	-	-	-	-	-	-	-	-	-	-	-	-	-
PALA8_04397	287.DR97_1790	6.75e-132	374.0	COG0741@1|root,COG0741@2|Bacteria,1RDXX@1224|Proteobacteria,1RQAD@1236|Gammaproteobacteria,1YHCJ@136841|Pseudomonas aeruginosa group	1236|Gammaproteobacteria	M	COG0741 Soluble lytic murein transglycosylase and related regulatory proteins (some contain LysM invasin domains)	-	-	-	-	-	-	-	-	-	-	-	-	SLT
PALA8_04398	287.DR97_1791	3.75e-109	315.0	COG3279@1|root,COG3279@2|Bacteria,1RISK@1224|Proteobacteria,1S5VM@1236|Gammaproteobacteria	1236|Gammaproteobacteria	KT	Protein of unknown function (DUF2859)	-	-	-	-	-	-	-	-	-	-	-	-	DUF2859
PALA8_04400	287.DR97_1793	0.0	1456.0	COG3505@1|root,COG3505@2|Bacteria,1MVGD@1224|Proteobacteria,1RNGF@1236|Gammaproteobacteria	1236|Gammaproteobacteria	U	Conjugal transfer protein TraG	traD	-	-	ko:K12071	-	-	-	-	ko00000,ko02044	3.A.7.11.1	-	-	TraG-D_C,TrwB_AAD_bind
PALA8_04401	287.DR97_1794	8.6e-169	472.0	28HMN@1|root,2Z7W5@2|Bacteria,1N798@1224|Proteobacteria,1S0PZ@1236|Gammaproteobacteria	1236|Gammaproteobacteria	S	Membrane	-	-	-	-	-	-	-	-	-	-	-	-	DUF4400
PALA8_04402	287.DR97_1795	0.0	943.0	COG0210@1|root,COG0210@2|Bacteria,1R4PV@1224|Proteobacteria,1RZXT@1236|Gammaproteobacteria,1YFRA@136841|Pseudomonas aeruginosa group	1236|Gammaproteobacteria	L	UvrD-like helicase C-terminal domain	-	-	-	-	-	-	-	-	-	-	-	-	AAA_19,UvrD-helicase,UvrD_C,UvrD_C_2
PALA8_04403	287.DR97_1796	3.36e-222	617.0	2ARXF@1|root,31H9C@2|Bacteria,1QEZ7@1224|Proteobacteria,1TBZ8@1236|Gammaproteobacteria,1YJHH@136841|Pseudomonas aeruginosa group	1236|Gammaproteobacteria	-	-	-	-	-	-	-	-	-	-	-	-	-	-	-
PALA8_04404	1005395.CSV86_18312	1.16e-27	103.0	2AYSW@1|root,31QY7@2|Bacteria,1QNGU@1224|Proteobacteria,1TM29@1236|Gammaproteobacteria,1YYVN@136845|Pseudomonas putida group	1236|Gammaproteobacteria	-	-	-	-	-	-	-	-	-	-	-	-	-	-	-
PALA8_04405	287.DR97_1817	2.02e-69	210.0	2CKXZ@1|root,313JK@2|Bacteria,1MYMS@1224|Proteobacteria	1224|Proteobacteria	S	Plasmid protein of unknown function (Plasmid_RAQPRD)	-	-	-	-	-	-	-	-	-	-	-	-	Plasmid_RAQPRD
PALA8_04406	220664.PFL_4701	2.8e-12	62.0	2BJ1I@1|root,32DA4@2|Bacteria,1QSCM@1224|Proteobacteria,1RVS3@1236|Gammaproteobacteria,1YUB7@136843|Pseudomonas fluorescens group	1236|Gammaproteobacteria	S	Protein of unknown function (DUF3262)	-	-	-	-	-	-	-	-	-	-	-	-	DUF3262
PALA8_04407	287.DR97_1819	1.05e-67	206.0	2CZMS@1|root,32T6P@2|Bacteria,1N1NY@1224|Proteobacteria,1S9C0@1236|Gammaproteobacteria	1236|Gammaproteobacteria	S	Protein of unknown function (DUF2976)	-	-	-	-	-	-	-	-	-	-	-	-	DUF2976
PALA8_04408	322710.Avin_36230	1.55e-49	161.0	2C0GK@1|root,2ZCAN@2|Bacteria,1RA16@1224|Proteobacteria,1S5BK@1236|Gammaproteobacteria	1236|Gammaproteobacteria	S	Protein of unknown function (DUF3487)	-	-	-	-	-	-	-	-	-	-	-	-	DUF3487
PALA8_04409	287.DR97_1821	2.95e-166	463.0	2DB81@1|root,2Z7PS@2|Bacteria,1MY5A@1224|Proteobacteria,1RP4B@1236|Gammaproteobacteria	1236|Gammaproteobacteria	S	Integrating conjugative element protein	-	-	-	-	-	-	-	-	-	-	-	-	DUF2895
PALA8_04410	287.DR97_1822	5.04e-200	555.0	COG1450@1|root,COG1450@2|Bacteria,1QTSI@1224|Proteobacteria,1T1FR@1236|Gammaproteobacteria	1236|Gammaproteobacteria	NU	Integrating conjugative element protein	-	-	-	-	-	-	-	-	-	-	-	-	DUF3438
PALA8_04411	287.DR97_1823	0.0	895.0	COG3064@1|root,COG3064@2|Bacteria,1MXIR@1224|Proteobacteria,1T1FI@1236|Gammaproteobacteria	1236|Gammaproteobacteria	M	Integrating conjugative element protein	-	-	-	-	-	-	-	-	-	-	-	-	-
PALA8_04412	287.DR97_1824	3.77e-102	295.0	28NPY@1|root,2ZBPP@2|Bacteria,1R85U@1224|Proteobacteria,1S4SA@1236|Gammaproteobacteria	1236|Gammaproteobacteria	S	Conjugal transfer protein	-	-	-	-	-	-	-	-	-	-	-	-	-
PALA8_04413	287.DR97_1825	0.0	1929.0	COG3451@1|root,COG3451@2|Bacteria,1MUEN@1224|Proteobacteria,1RPAY@1236|Gammaproteobacteria	1236|Gammaproteobacteria	U	type IV secretory pathway, VirB4 components	-	-	-	-	-	-	-	-	-	-	-	-	DUF87,TraC_F_IV
PALA8_04414	322710.Avin_36290	4.57e-36	124.0	2DXZA@1|root,3479T@2|Bacteria,1NZPU@1224|Proteobacteria,1SSE8@1236|Gammaproteobacteria	1236|Gammaproteobacteria	-	-	-	-	-	-	-	-	-	-	-	-	-	-	-
PALA8_04415	287.DR97_1828	5.02e-149	420.0	COG1651@1|root,COG1651@2|Bacteria,1QE14@1224|Proteobacteria,1TAC6@1236|Gammaproteobacteria,1YK6Y@136841|Pseudomonas aeruginosa group	1236|Gammaproteobacteria	O	Thioredoxin	-	-	-	-	-	-	-	-	-	-	-	-	Thioredoxin_4
PALA8_04417	1042876.PPS_5229	2.75e-51	166.0	COG1961@1|root,COG1961@2|Bacteria,1R3XB@1224|Proteobacteria,1RSC2@1236|Gammaproteobacteria,1YXDI@136845|Pseudomonas putida group	1236|Gammaproteobacteria	L	Helix-turn-helix domain of resolvase	tnpR	-	-	-	-	-	-	-	-	-	-	-	HTH_7,Resolvase
PALA8_04418	1042876.PPS_5229	2.89e-42	142.0	COG1961@1|root,COG1961@2|Bacteria,1R3XB@1224|Proteobacteria,1RSC2@1236|Gammaproteobacteria,1YXDI@136845|Pseudomonas putida group	1236|Gammaproteobacteria	L	Helix-turn-helix domain of resolvase	tnpR	-	-	-	-	-	-	-	-	-	-	-	HTH_7,Resolvase
PALA8_04421	287.DR97_6328	8.68e-69	223.0	COG1880@1|root,COG1880@2|Bacteria	2|Bacteria	CH	PFAM CO dehydrogenase beta subunit acetyl-CoA synthase epsilon subunit	lplA	-	6.3.1.20	ko:K00195,ko:K03800	ko00680,ko00785,ko01100,ko01120,ko01200,map00680,map00785,map01100,map01120,map01200	M00422	R07157,R07770,R07771,R11143	RC00043,RC00070,RC00090,RC00992,RC02800,RC02896	ko00000,ko00001,ko00002,ko01000	-	-	-	BPL_LplA_LipB,CO_dh
PALA8_04422	1452718.JBOY01000065_gene2449	0.0	1898.0	COG4644@1|root,COG4644@2|Bacteria,1MUIU@1224|Proteobacteria,1RPZZ@1236|Gammaproteobacteria	1236|Gammaproteobacteria	L	Transposase	-	-	-	-	-	-	-	-	-	-	-	-	DDE_Tnp_Tn3,DUF4158
PALA8_04424	287.DR97_1830	2.06e-233	641.0	28H5A@1|root,2Z7HX@2|Bacteria,1PFKH@1224|Proteobacteria,1RY1T@1236|Gammaproteobacteria	1236|Gammaproteobacteria	S	Integrating conjugative element protein	-	-	-	-	-	-	-	-	-	-	-	-	TraU
PALA8_04425	287.DR97_1831	2.8e-315	860.0	COG3772@1|root,COG3772@2|Bacteria,1MV52@1224|Proteobacteria,1RNVH@1236|Gammaproteobacteria,1YIEW@136841|Pseudomonas aeruginosa group	1236|Gammaproteobacteria	S	Integrating conjugative element protein	-	-	-	-	-	-	-	-	-	-	-	-	-
PALA8_04426	1388763.O165_001190	1.47e-11	63.9	2BKH8@1|root,32EY8@2|Bacteria,1PCGK@1224|Proteobacteria,1SXHE@1236|Gammaproteobacteria,1YYW3@136845|Pseudomonas putida group	1236|Gammaproteobacteria	-	-	-	-	-	-	-	-	-	-	-	-	-	-	-
PALA8_04427	287.DR97_1833	0.0	935.0	28HEB@1|root,2Z7QR@2|Bacteria,1PZ0K@1224|Proteobacteria,1RRW2@1236|Gammaproteobacteria	1236|Gammaproteobacteria	S	Membrane	-	-	-	-	-	-	-	-	-	-	-	-	TraG_N
PALA8_04429	287.DR97_1834	8.61e-54	169.0	COG3609@1|root,COG3609@2|Bacteria	2|Bacteria	K	positive regulation of growth	-	-	-	ko:K07746	-	-	-	-	ko00000,ko02048	-	-	-	ParD_antitoxin
PALA8_04430	287.DR97_1835	1.14e-68	208.0	COG3668@1|root,COG3668@2|Bacteria,1NAKC@1224|Proteobacteria	1224|Proteobacteria	S	Plasmid stabilization system protein	-	-	-	ko:K19092	-	-	-	-	ko00000,ko02048	-	-	-	ParE_toxin
PALA8_04431	1380358.JADJ01000012_gene835	1.48e-26	104.0	COG1672@1|root,COG1672@2|Bacteria,1N3UV@1224|Proteobacteria,1S0KK@1236|Gammaproteobacteria	1236|Gammaproteobacteria	S	PFAM Archaeal ATPase	-	-	-	-	-	-	-	-	-	-	-	-	TIR_2
PALA8_04432	1388763.O165_023335	1.09e-98	291.0	COG0338@1|root,COG0338@2|Bacteria,1QDNB@1224|Proteobacteria,1RXZB@1236|Gammaproteobacteria	1236|Gammaproteobacteria	L	D12 class N6 adenine-specific DNA methyltransferase	-	-	-	-	-	-	-	-	-	-	-	-	MethyltransfD12
PALA8_04433	1217703.F904_00999	4.06e-118	346.0	COG1059@1|root,COG1059@2|Bacteria,1RITA@1224|Proteobacteria,1SJ2Q@1236|Gammaproteobacteria	1236|Gammaproteobacteria	L	Responsible for removing an oxidatively damaged form of guanine (7,8-dihydro-8-oxoguanine 7-oxoG) from DNA. Also nicks DNA at apurinic apyrimidinic sites (AP sites)	-	-	-	-	-	-	-	-	-	-	-	-	-
PALA8_04434	1217703.F904_00997	1.67e-97	288.0	COG0603@1|root,COG0603@2|Bacteria,1RG3H@1224|Proteobacteria,1SKP5@1236|Gammaproteobacteria,3NQQ8@468|Moraxellaceae	1236|Gammaproteobacteria	F	Queuosine biosynthesis protein QueC	-	-	6.3.4.20	ko:K06920	ko00790,ko01100,map00790,map01100	-	R09978	RC00959	ko00000,ko00001,ko01000,ko03016	-	-	-	QueC
PALA8_04435	857087.Metme_4485	2.38e-156	454.0	COG0524@1|root,COG3613@1|root,COG0524@2|Bacteria,COG3613@2|Bacteria,1QA9U@1224|Proteobacteria,1S7ZI@1236|Gammaproteobacteria	1236|Gammaproteobacteria	G	pfkB family carbohydrate kinase	-	-	-	-	-	-	-	-	-	-	-	-	Nuc_deoxyrib_tr,PfkB
PALA8_04437	287.DR97_1840	1.77e-264	736.0	COG3481@1|root,COG3481@2|Bacteria,1MUZY@1224|Proteobacteria,1RQUZ@1236|Gammaproteobacteria	1236|Gammaproteobacteria	S	relaxase	traI	-	-	-	-	-	-	-	-	-	-	-	TraI_2,TraI_2_C
PALA8_04438	587753.EY04_24205	6.72e-45	161.0	COG3481@1|root,COG3481@2|Bacteria,1MUZY@1224|Proteobacteria,1RQUZ@1236|Gammaproteobacteria	1236|Gammaproteobacteria	S	relaxase	traI	-	-	-	-	-	-	-	-	-	-	-	TraI_2,TraI_2_C
PALA8_04439	287.DR97_1841	1.34e-296	810.0	COG4973@1|root,COG4973@2|Bacteria,1QTSJ@1224|Proteobacteria,1T1FS@1236|Gammaproteobacteria	1236|Gammaproteobacteria	L	Belongs to the 'phage' integrase family	-	-	-	-	-	-	-	-	-	-	-	-	Phage_integrase
PALA8_04530	287.DR97_1048	6.08e-65	208.0	COG4992@1|root,COG4992@2|Bacteria,1MV3C@1224|Proteobacteria,1RMV1@1236|Gammaproteobacteria,1YE7F@136841|Pseudomonas aeruginosa group	1236|Gammaproteobacteria	E	Aminotransferase class-III	argD	GO:0003674,GO:0003824,GO:0003992,GO:0004069,GO:0005488,GO:0005515,GO:0006082,GO:0006105,GO:0006520,GO:0006525,GO:0006526,GO:0006527,GO:0006553,GO:0006591,GO:0006593,GO:0006807,GO:0008144,GO:0008150,GO:0008152,GO:0008483,GO:0008652,GO:0009016,GO:0009056,GO:0009058,GO:0009063,GO:0009064,GO:0009065,GO:0009066,GO:0009067,GO:0009084,GO:0009085,GO:0009089,GO:0009987,GO:0016053,GO:0016054,GO:0016740,GO:…	2.6.1.11,2.6.1.17,2.6.1.81	ko:K00821,ko:K00840	ko00220,ko00300,ko00330,ko01100,ko01110,ko01120,ko01130,ko01210,ko01230,map00220,map00300,map00330,map01100,map01110,map01120,map01130,map01210,map01230	M00016,M00028,M00845	R02283,R04217,R04475	RC00006,RC00062	ko00000,ko00001,ko00002,ko01000,ko01007	-	-	iAPECO1_1312.APECO1_817,iEC55989_1330.EC55989_1916,iECABU_c1320.ECABU_c20050,iECED1_1282.ECED1_1950,iECOK1_1307.ECOK1_1868,iECP_1309.ECP_1694,iECS88_1305.ECS88_1800,iEcSMS35_1347.EcSMS35_1443,iSFV_1184.SFV_3365,iSF_1195.SF3378,iSFxv_1172.SFxv_3689,iSSON_1240.SSON_3490,iS_1188.S4385,iUMN146_1321.UM146_08405,iUTI89_1310.UTI89_C1943,ic_1306.c2148	Aminotran_3
PALA8_04531	3659.XP_004153409.1	2.63e-22	93.2	COG4992@1|root,KOG1401@2759|Eukaryota,37JRF@33090|Viridiplantae,3GBNS@35493|Streptophyta	35493|Streptophyta	E	Belongs to the class-III pyridoxal-phosphate-dependent aminotransferase family	-	-	2.6.1.11	ko:K00818	ko00220,ko01100,ko01110,ko01130,ko01210,ko01230,map00220,map01100,map01110,map01130,map01210,map01230	M00028	R02283	RC00006,RC00062	ko00000,ko00001,ko00002,ko01000,ko01007	-	-	-	Aminotran_3
PALA8_04604	269796.Rru_A0511	0.0	1263.0	COG1204@1|root,COG1204@2|Bacteria,1N8A5@1224|Proteobacteria,2VF74@28211|Alphaproteobacteria,2JYKH@204441|Rhodospirillales	204441|Rhodospirillales	L	helicase superfamily c-terminal domain	-	-	-	-	-	-	-	-	-	-	-	-	DEAD,Helicase_C
PALA8_04605	1037409.BJ6T_76650	1.24e-153	438.0	2DBNE@1|root,2ZA3J@2|Bacteria,1N1G9@1224|Proteobacteria,2TW6G@28211|Alphaproteobacteria,3K0W7@41294|Bradyrhizobiaceae	28211|Alphaproteobacteria	S	Domain of unknown function (DUF1837)	-	-	-	-	-	-	-	-	-	-	-	-	DUF1837
PALA8_04606	237609.PSAKL28_06110	1.13e-23	94.4	2E4CW@1|root,32Z8A@2|Bacteria,1N7FD@1224|Proteobacteria,1T0HZ@1236|Gammaproteobacteria	1236|Gammaproteobacteria	-	-	-	-	-	-	-	-	-	-	-	-	-	-	-
PALA8_04607	1333856.L686_18235	1.29e-232	640.0	28HEE@1|root,2Z7QU@2|Bacteria,1MXU6@1224|Proteobacteria,1RZSJ@1236|Gammaproteobacteria,1Z1Z6@136846|Pseudomonas stutzeri group	1236|Gammaproteobacteria	S	Domain of unknown function (DUF932)	-	-	-	-	-	-	-	-	-	-	-	-	DUF932
PALA8_04608	1333856.L686_18230	1.39e-233	643.0	COG5377@1|root,COG5377@2|Bacteria,1MWP8@1224|Proteobacteria,1RN9Q@1236|Gammaproteobacteria,1Z05T@136846|Pseudomonas stutzeri group	1236|Gammaproteobacteria	L	COG5377 Phage-related protein	-	-	-	-	-	-	-	-	-	-	-	-	YqaJ
PALA8_04609	1149133.ppKF707_0382	2.01e-217	601.0	COG4570@1|root,COG4570@2|Bacteria,1R3BK@1224|Proteobacteria,1T665@1236|Gammaproteobacteria	1236|Gammaproteobacteria	L	Endonuclease that resolves Holliday junction intermediates made during homologous genetic recombination and DNA repair. Exhibits sequence and structure-selective cleavage of four-way DNA junctions, where it introduces symmetrical nicks in two strands of the same polarity at the 5' side of dinucleotides. Corrects the defects in genetic recombination and DNA repair associated with inactivation of r…	-	-	-	-	-	-	-	-	-	-	-	-	-
PALA8_04610	1149133.ppKF707_0383	7.6e-113	324.0	COG2003@1|root,COG2003@2|Bacteria,1MXZ5@1224|Proteobacteria,1RPZ8@1236|Gammaproteobacteria,1YGAB@136841|Pseudomonas aeruginosa group	1236|Gammaproteobacteria	E	RadC-like JAB domain	-	-	-	ko:K03630	-	-	-	-	ko00000	-	-	-	RadC
PALA8_04611	1149133.ppKF707_0384	2.93e-20	82.8	2AS8U@1|root,31HMX@2|Bacteria,1QFCI@1224|Proteobacteria,1TCJK@1236|Gammaproteobacteria,1YKE1@136841|Pseudomonas aeruginosa group	1236|Gammaproteobacteria	-	-	-	-	-	-	-	-	-	-	-	-	-	-	-
PALA8_04613	1149133.ppKF707_0385	1.58e-63	195.0	COG1396@1|root,COG1396@2|Bacteria,1N0E4@1224|Proteobacteria	1224|Proteobacteria	K	Transcriptional Regulator, XRE family	-	-	-	-	-	-	-	-	-	-	-	-	HTH_3,HTH_31
PALA8_04614	1448139.AI20_13865	1.16e-15	74.3	2E5U4@1|root,330IF@2|Bacteria,1NAXJ@1224|Proteobacteria,1SEME@1236|Gammaproteobacteria	1236|Gammaproteobacteria	-	-	-	-	-	-	-	-	-	-	-	-	-	-	-
PALA8_04615	237609.PSAKL28_05670	8.06e-165	474.0	COG2849@1|root,COG2849@2|Bacteria,1N5D4@1224|Proteobacteria,1SVW3@1236|Gammaproteobacteria	1236|Gammaproteobacteria	S	repeat protein	-	-	-	-	-	-	-	-	-	-	-	-	-
PALA8_04616	1218352.B597_020225	0.0	1908.0	COG0610@1|root,COG0610@2|Bacteria,1MU96@1224|Proteobacteria,1RP2Q@1236|Gammaproteobacteria,1Z17A@136846|Pseudomonas stutzeri group	1236|Gammaproteobacteria	V	Subunit R is required for both nuclease and ATPase activities, but not for modification	hsdR	-	3.1.21.3	ko:K01153	-	-	-	-	ko00000,ko01000,ko02048	-	-	-	DUF3387,HSDR_N,ResIII
PALA8_04617	1218352.B597_020230	0.0	2079.0	COG0553@1|root,COG0553@2|Bacteria,1MV6M@1224|Proteobacteria,1RQ34@1236|Gammaproteobacteria,1Z18F@136846|Pseudomonas stutzeri group	1236|Gammaproteobacteria	KL	helicase	-	-	-	-	-	-	-	-	-	-	-	-	Helicase_C,Mrr_cat,SNF2_N,SWIM
PALA8_04618	1218352.B597_020235	0.0	1019.0	29YSP@1|root,30KNW@2|Bacteria,1RF6M@1224|Proteobacteria,1S102@1236|Gammaproteobacteria	1236|Gammaproteobacteria	S	EH_Signature domain	-	-	-	-	-	-	-	-	-	-	-	-	EH_Signature
PALA8_04619	1218352.B597_020240	1.18e-169	474.0	COG1360@1|root,COG1360@2|Bacteria,1R3Q0@1224|Proteobacteria,1S1J2@1236|Gammaproteobacteria	1236|Gammaproteobacteria	N	Membrane MotB of proton-channel complex MotA/MotB	-	-	-	-	-	-	-	-	-	-	-	-	MotB_plug,OmpA
PALA8_04620	1218352.B597_020245	0.0	1042.0	COG1196@1|root,COG1196@2|Bacteria,1R016@1224|Proteobacteria,1RTC5@1236|Gammaproteobacteria	1236|Gammaproteobacteria	D	nuclear chromosome segregation	-	-	-	-	-	-	-	-	-	-	-	-	-
PALA8_04621	1517681.HW45_03145	2.07e-116	355.0	COG0732@1|root,COG0732@2|Bacteria,1MXSQ@1224|Proteobacteria,1S320@1236|Gammaproteobacteria,1XXDQ@135623|Vibrionales	135623|Vibrionales	V	COG0732 Restriction endonuclease S subunits	-	-	3.1.21.3	ko:K01154	-	-	-	-	ko00000,ko01000,ko02048	-	-	-	Methylase_S
PALA8_04622	1182590.BN5_00892	0.0	1128.0	COG0286@1|root,COG0286@2|Bacteria,1MW3A@1224|Proteobacteria,1RMRA@1236|Gammaproteobacteria,1YG4S@136841|Pseudomonas aeruginosa group	1236|Gammaproteobacteria	V	HsdM N-terminal domain	hsdM	-	2.1.1.72	ko:K03427	-	-	-	-	ko00000,ko01000,ko02048	-	-	-	HsdM_N,N6_Mtase
PALA8_04623	1215092.PA6_024_00240	5e-118	342.0	2EGQR@1|root,33AGW@2|Bacteria,1NN0W@1224|Proteobacteria	1224|Proteobacteria	S	tRNA_anti-like	-	-	-	-	-	-	-	-	-	-	-	-	tRNA_anti-like
PALA8_04624	1333856.L686_18150	1.04e-211	584.0	COG2378@1|root,COG2378@2|Bacteria,1Q19K@1224|Proteobacteria,1RZ1N@1236|Gammaproteobacteria,1Z054@136846|Pseudomonas stutzeri group	1236|Gammaproteobacteria	K	Transcriptional regulator	-	-	-	-	-	-	-	-	-	-	-	-	WYL
PALA8_04625	1333856.L686_18145	3.87e-93	274.0	COG3012@1|root,COG3012@2|Bacteria,1QU5B@1224|Proteobacteria,1T24K@1236|Gammaproteobacteria,1Z494@136846|Pseudomonas stutzeri group	1236|Gammaproteobacteria	S	Plasmid pRiA4b ORF-3-like protein	-	-	-	-	-	-	-	-	-	-	-	-	PRiA4_ORF3
PALA8_04629	287.DR97_1128	2.55e-108	318.0	COG0582@1|root,COG0582@2|Bacteria,1N45B@1224|Proteobacteria,1RNDM@1236|Gammaproteobacteria,1YI6X@136841|Pseudomonas aeruginosa group	1236|Gammaproteobacteria	L	Phage integrase family	-	-	-	-	-	-	-	-	-	-	-	-	Phage_integrase
PALA8_04630	287.DR97_1388	2.24e-36	132.0	COG0582@1|root,COG0582@2|Bacteria,1N45B@1224|Proteobacteria,1RNDM@1236|Gammaproteobacteria,1YFN3@136841|Pseudomonas aeruginosa group	1236|Gammaproteobacteria	L	Phage integrase family	-	-	-	-	-	-	-	-	-	-	-	-	Phage_integrase
PALA8_04631	287.DR97_1389	1.79e-70	224.0	28JT0@1|root,2Z9IB@2|Bacteria,1R5B0@1224|Proteobacteria,1S0EH@1236|Gammaproteobacteria,1YCRR@136841|Pseudomonas aeruginosa group	1236|Gammaproteobacteria	-	-	-	-	-	-	-	-	-	-	-	-	-	-	-
PALA8_04664	1294143.H681_06855	3.72e-85	259.0	COG2227@1|root,COG2227@2|Bacteria,1REWV@1224|Proteobacteria,1T1J3@1236|Gammaproteobacteria	1236|Gammaproteobacteria	H	methyltransferase	ubiG3	-	-	-	-	-	-	-	-	-	-	-	Methyltransf_23,Methyltransf_25
PALA8_04723	287.DR97_1252	2.02e-43	141.0	2CA5H@1|root,33A7N@2|Bacteria,1NI9X@1224|Proteobacteria,1TB7K@1236|Gammaproteobacteria,1YH2J@136841|Pseudomonas aeruginosa group	1236|Gammaproteobacteria	S	Cysteine-rich CWC	-	-	-	-	-	-	-	-	-	-	-	-	Cys_rich_CWC
PALA8_04729	287.DR97_1387	1.16e-74	223.0	COG3668@1|root,COG3668@2|Bacteria,1NG45@1224|Proteobacteria,1TCEU@1236|Gammaproteobacteria,1YK9C@136841|Pseudomonas aeruginosa group	1236|Gammaproteobacteria	S	ParE toxin of type II toxin-antitoxin system, parDE	-	-	-	-	-	-	-	-	-	-	-	-	ParE_toxin
PALA8_04730	287.DR97_1388	1.83e-121	352.0	COG0582@1|root,COG0582@2|Bacteria,1N45B@1224|Proteobacteria,1RNDM@1236|Gammaproteobacteria,1YFN3@136841|Pseudomonas aeruginosa group	1236|Gammaproteobacteria	L	Phage integrase family	-	-	-	-	-	-	-	-	-	-	-	-	Phage_integrase
PALA8_04731	287.DR97_1388	1.15e-87	265.0	COG0582@1|root,COG0582@2|Bacteria,1N45B@1224|Proteobacteria,1RNDM@1236|Gammaproteobacteria,1YFN3@136841|Pseudomonas aeruginosa group	1236|Gammaproteobacteria	L	Phage integrase family	-	-	-	-	-	-	-	-	-	-	-	-	Phage_integrase
PALA8_04732	287.DR97_1995	0.0	877.0	28JT0@1|root,2Z9IB@2|Bacteria,1R5B0@1224|Proteobacteria,1S0EH@1236|Gammaproteobacteria,1YCRR@136841|Pseudomonas aeruginosa group	1236|Gammaproteobacteria	-	-	-	-	-	-	-	-	-	-	-	-	-	-	-
PALA8_04734	10871.VG424_BPPF1	1.69e-278	764.0	4QBME@10239|Viruses,4QUKP@29258|ssDNA viruses,4QP4G@10860|Inoviridae	10860|Inoviridae	S	Zonular occludens toxin (Zot)	-	-	-	-	-	-	-	-	-	-	-	-	-
PALA8_04735	1437882.AZRU01000010_gene579	9.32e-62	191.0	2AS6Q@1|root,31HJN@2|Bacteria,1QFAB@1224|Proteobacteria,1TCFW@1236|Gammaproteobacteria,1YKAN@136841|Pseudomonas aeruginosa group	1236|Gammaproteobacteria	S	Protein of unknown function (DUF2523)	-	-	-	-	-	-	-	-	-	-	-	-	DUF2523
PALA8_04736	1437882.AZRU01000010_gene578	1.66e-47	170.0	2EJKT@1|root,33DBQ@2|Bacteria,1NPKA@1224|Proteobacteria,1TB51@1236|Gammaproteobacteria,1YGZB@136841|Pseudomonas aeruginosa group	1236|Gammaproteobacteria	-	-	-	-	-	-	-	-	-	-	-	-	-	-	-
PALA8_04738	1437882.AZRU01000010_gene576	2.16e-37	127.0	2AIVB@1|root,319CJ@2|Bacteria,1QFBC@1224|Proteobacteria,1TCHQ@1236|Gammaproteobacteria,1YKCD@136841|Pseudomonas aeruginosa group	1236|Gammaproteobacteria	-	-	-	-	-	-	-	-	-	-	-	-	-	-	-
PALA8_04740	287.DR97_1398	4.98e-92	270.0	2AS78@1|root,31HK7@2|Bacteria,1QFAV@1224|Proteobacteria,1TCGY@1236|Gammaproteobacteria,1YKBJ@136841|Pseudomonas aeruginosa group	287.DR97_1398|-	-	-	-	-	-	-	-	-	-	-	-	-	-	-	-
PALA8_04741	440512.C211_04145	2.81e-126	363.0	COG0270@1|root,COG0270@2|Bacteria,1R6IB@1224|Proteobacteria,1SQ0T@1236|Gammaproteobacteria	1236|Gammaproteobacteria	L	DNA (cytosine-5-)-methyltransferase activity	-	-	-	-	-	-	-	-	-	-	-	-	-
PALA8_04742	287.DR97_1399	1.32e-138	394.0	2DM22@1|root,31DR9@2|Bacteria	2|Bacteria	S	Arc-like DNA binding domain	-	-	-	-	-	-	-	-	-	-	-	-	Arc
PALA8_04743	287.DR97_1400	1.3e-44	144.0	2ARG3@1|root,31GSA@2|Bacteria,1QEFH@1224|Proteobacteria,1TB4U@1236|Gammaproteobacteria,1YGYF@136841|Pseudomonas aeruginosa group	1236|Gammaproteobacteria	-	-	-	-	-	-	-	-	-	-	-	-	-	-	-
PALA8_04744	1123519.PSJM300_05480	1.19e-14	70.1	COG1396@1|root,COG1396@2|Bacteria,1PJ1Y@1224|Proteobacteria,1TB5G@1236|Gammaproteobacteria,1Z45H@136846|Pseudomonas stutzeri group	1236|Gammaproteobacteria	K	sequence-specific DNA binding	-	-	-	-	-	-	-	-	-	-	-	-	-
PALA8_04746	287.DR97_1401	2.22e-69	219.0	2ATQA@1|root,31H9Z@2|Bacteria,1QEZV@1224|Proteobacteria,1TC07@1236|Gammaproteobacteria,1YJJS@136841|Pseudomonas aeruginosa group	1236|Gammaproteobacteria	-	-	-	-	-	-	-	-	-	-	-	-	-	-	-
PALA8_04748	1177154.Y5S_02588	4.68e-08	60.8	2DRH8@1|root,33BR5@2|Bacteria,1NIAH@1224|Proteobacteria,1SH71@1236|Gammaproteobacteria	1236|Gammaproteobacteria	-	-	-	-	-	-	-	-	-	-	-	-	-	-	-
PALA8_04776	1211112.ALJC01000075_gene3117	0.0	1493.0	COG3210@1|root,COG3210@2|Bacteria,1MXIP@1224|Proteobacteria,1RZM6@1236|Gammaproteobacteria	1236|Gammaproteobacteria	U	Filamentous haemagglutinin family outer membrane protein	-	-	-	-	-	-	-	-	-	-	-	-	DUF3739,Haemagg_act
PALA8_04777	1439940.BAY1663_00175	1.17e-207	654.0	COG3210@1|root,COG3210@2|Bacteria,1MXIP@1224|Proteobacteria,1RZM6@1236|Gammaproteobacteria	1236|Gammaproteobacteria	U	Filamentous haemagglutinin family outer membrane protein	-	-	-	-	-	-	-	-	-	-	-	-	DUF3739,Haemagg_act
PALA8_04778	220664.PFL_2761	0.0	2144.0	COG3210@1|root,COG3210@2|Bacteria,1MXIP@1224|Proteobacteria,1RZM6@1236|Gammaproteobacteria,1YSXY@136843|Pseudomonas fluorescens group	1236|Gammaproteobacteria	U	Filamentous haemagglutinin family outer membrane protein	-	-	-	-	-	-	-	-	-	-	-	-	DUF3739,Haemagg_act
PALA8_04779	1114970.PSF113_3701	1.56e-194	549.0	COG0226@1|root,COG0226@2|Bacteria,1RE1I@1224|Proteobacteria,1SFX9@1236|Gammaproteobacteria	1236|Gammaproteobacteria	P	Part of the ABC transporter complex PstSACB involved in phosphate import	-	-	-	-	-	-	-	-	-	-	-	-	PBP_like_2
PALA8_05034	287.DR97_1693	0.0	1498.0	COG4774@1|root,COG4774@2|Bacteria,1MV0X@1224|Proteobacteria,1RN3C@1236|Gammaproteobacteria,1YEHG@136841|Pseudomonas aeruginosa group	1236|Gammaproteobacteria	P	TonB-dependent Receptor Plug Domain	-	-	-	ko:K16090	-	-	-	-	ko00000,ko02000	1.B.14.1.11	-	-	Plug,TonB_dep_Rec
PALA8_05042	287.DR97_1702	0.0	1428.0	COG4223@1|root,COG4223@2|Bacteria,1N10X@1224|Proteobacteria,1RYCQ@1236|Gammaproteobacteria,1YDHW@136841|Pseudomonas aeruginosa group	1236|Gammaproteobacteria	S	Protein of unknown function (DUF1631)	-	-	-	-	-	-	-	-	-	-	-	-	DUF1631
PALA8_05046	287.DR97_1708	5.9e-278	761.0	COG1459@1|root,COG1459@2|Bacteria,1MV4U@1224|Proteobacteria,1RNV0@1236|Gammaproteobacteria,1YEVX@136841|Pseudomonas aeruginosa group	1236|Gammaproteobacteria	U	Type II secretion system (T2SS), protein F	pilC	GO:0002790,GO:0005575,GO:0005623,GO:0005886,GO:0006810,GO:0008104,GO:0008150,GO:0009297,GO:0009306,GO:0009987,GO:0015031,GO:0015628,GO:0015833,GO:0016020,GO:0016043,GO:0022607,GO:0030030,GO:0030031,GO:0032940,GO:0033036,GO:0042886,GO:0043711,GO:0044085,GO:0044464,GO:0045184,GO:0046903,GO:0051179,GO:0051234,GO:0055085,GO:0071702,GO:0071705,GO:0071806,GO:0071840,GO:0071944,GO:0098776	-	ko:K02653	-	-	-	-	ko00000,ko02035,ko02044	3.A.15.2	-	-	T2SSF
PALA8_05118	287.DR97_1899	5.44e-148	422.0	COG1136@1|root,COG1136@2|Bacteria,1MU45@1224|Proteobacteria,1RXBX@1236|Gammaproteobacteria,1YI8I@136841|Pseudomonas aeruginosa group	1236|Gammaproteobacteria	V	ATPases associated with a variety of cellular activities	-	-	-	ko:K02003	-	M00258	-	-	ko00000,ko00002,ko02000	3.A.1	-	-	ABC_tran
PALA8_05122	287.DR97_1903	0.0	882.0	COG1538@1|root,COG1538@2|Bacteria,1MUA8@1224|Proteobacteria,1RMDA@1236|Gammaproteobacteria,1YER9@136841|Pseudomonas aeruginosa group	1236|Gammaproteobacteria	MU	Outer membrane efflux protein	cusC	GO:0000041,GO:0003674,GO:0005215,GO:0005375,GO:0005488,GO:0005507,GO:0006464,GO:0006497,GO:0006807,GO:0006810,GO:0006811,GO:0006812,GO:0006825,GO:0006873,GO:0006875,GO:0006878,GO:0006950,GO:0008150,GO:0008152,GO:0008289,GO:0008324,GO:0009058,GO:0009059,GO:0009636,GO:0009987,GO:0010035,GO:0010038,GO:0010272,GO:0010273,GO:0015075,GO:0015318,GO:0016043,GO:0018345,GO:0019538,GO:0019725,GO:0019992,GO:…	-	ko:K07796,ko:K08721,ko:K18139	ko01501,ko02020,ko02024,map01501,map02020,map02024	M00639,M00642,M00643,M00647,M00718,M00768,M00822	-	-	ko00000,ko00001,ko00002,ko01504,ko02000	1.B.17,1.B.17.3.4,1.B.17.3.5,2.A.6.2	-	iAPECO1_1312.APECO1_1476,iECOK1_1307.ECOK1_0581,iECS88_1305.ECS88_0609,iSFxv_1172.SFxv_0521,iS_1188.S0481,iUMN146_1321.UM146_14655,iUTI89_1310.UTI89_C0572	OEP
PALA8_05151	287.DR97_1932	0.0	2845.0	COG3210@1|root,COG3210@2|Bacteria,1MXIP@1224|Proteobacteria,1RSAX@1236|Gammaproteobacteria,1YHVZ@136841|Pseudomonas aeruginosa group	1236|Gammaproteobacteria	U	adhes_NPXG filamentous hemagglutinin family N-terminal domain protein	-	-	-	-	-	-	-	-	-	-	-	-	Glug,Haemagg_act
PALA8_05207	287.DR97_1995	0.0	894.0	28JT0@1|root,2Z9IB@2|Bacteria,1R5B0@1224|Proteobacteria,1S0EH@1236|Gammaproteobacteria,1YCRR@136841|Pseudomonas aeruginosa group	1236|Gammaproteobacteria	-	-	-	-	-	-	-	-	-	-	-	-	-	-	-
PALA8_05209	10871.VG424_BPPF1	1.37e-261	722.0	4QBME@10239|Viruses,4QUKP@29258|ssDNA viruses,4QP4G@10860|Inoviridae	10860|Inoviridae	S	Zonular occludens toxin (Zot)	-	-	-	-	-	-	-	-	-	-	-	-	-
PALA8_05210	1437882.AZRU01000010_gene579	9.32e-62	191.0	2AS6Q@1|root,31HJN@2|Bacteria,1QFAB@1224|Proteobacteria,1TCFW@1236|Gammaproteobacteria,1YKAN@136841|Pseudomonas aeruginosa group	1236|Gammaproteobacteria	S	Protein of unknown function (DUF2523)	-	-	-	-	-	-	-	-	-	-	-	-	DUF2523
PALA8_05211	1437882.AZRU01000010_gene578	1.66e-47	170.0	2EJKT@1|root,33DBQ@2|Bacteria,1NPKA@1224|Proteobacteria,1TB51@1236|Gammaproteobacteria,1YGZB@136841|Pseudomonas aeruginosa group	1236|Gammaproteobacteria	-	-	-	-	-	-	-	-	-	-	-	-	-	-	-
PALA8_05213	1437882.AZRU01000010_gene576	2.16e-37	127.0	2AIVB@1|root,319CJ@2|Bacteria,1QFBC@1224|Proteobacteria,1TCHQ@1236|Gammaproteobacteria,1YKCD@136841|Pseudomonas aeruginosa group	1236|Gammaproteobacteria	-	-	-	-	-	-	-	-	-	-	-	-	-	-	-
PALA8_05217	1245471.PCA10_48420	4.64e-34	120.0	2BR65@1|root,32K4C@2|Bacteria,1QFDP@1224|Proteobacteria,1TCM6@1236|Gammaproteobacteria,1YKFG@136841|Pseudomonas aeruginosa group	1236|Gammaproteobacteria	-	-	-	-	-	-	-	-	-	-	-	-	-	-	-
PALA8_05218	85643.Tmz1t_2084	5.38e-138	409.0	COG1746@1|root,COG1746@2|Bacteria,1NVSS@1224|Proteobacteria	1224|Proteobacteria	J	tRNA cytidylyltransferase activity	-	-	-	-	-	-	-	-	-	-	-	-	NTP_transf_2
PALA8_05427	1232683.ADIMK_0137	4.04e-13	73.6	28ZPQ@1|root,30TM9@2|Bacteria,1QQY4@1224|Proteobacteria,1RTNT@1236|Gammaproteobacteria,46ARR@72275|Alteromonadaceae	1236|Gammaproteobacteria	-	-	-	-	-	-	-	-	-	-	-	-	-	-	-
PALA8_05486	1122132.AQYH01000007_gene2049	3.53e-34	130.0	COG2723@1|root,COG2723@2|Bacteria,1MWG6@1224|Proteobacteria,2TSRN@28211|Alphaproteobacteria,4BEHV@82115|Rhizobiaceae	28211|Alphaproteobacteria	G	Glycosyl hydrolase family 1	bglA	-	3.2.1.21	ko:K05350	ko00460,ko00500,ko00940,ko01100,ko01110,map00460,map00500,map00940,map01100,map01110	-	R00026,R02558,R02887,R02985,R03527,R04949,R04998,R10035,R10039,R10040	RC00049,RC00059,RC00171,RC00262,RC00397,RC00451,RC00714,RC00746,RC01248	ko00000,ko00001,ko01000	-	-	-	Glyco_hydro_1
PALA8_05487	1173026.Glo7428_4617	4.61e-72	235.0	COG2723@1|root,COG2723@2|Bacteria,1GA35@1117|Cyanobacteria	1117|Cyanobacteria	G	Belongs to the glycosyl hydrolase 1 family	-	-	3.2.1.21	ko:K05350	ko00460,ko00500,ko00940,ko01100,ko01110,map00460,map00500,map00940,map01100,map01110	-	R00026,R02558,R02887,R02985,R03527,R04949,R04998,R10035,R10039,R10040	RC00049,RC00059,RC00171,RC00262,RC00397,RC00451,RC00714,RC00746,RC01248	ko00000,ko00001,ko01000	-	-	-	Glyco_hydro_1,SBP_bac_3
PALA8_05560	287.DR97_2354	9.94e-286	781.0	COG3307@1|root,COG3307@2|Bacteria,1N80K@1224|Proteobacteria,1SYC7@1236|Gammaproteobacteria,1YKUZ@136841|Pseudomonas aeruginosa group	1236|Gammaproteobacteria	M	O-Antigen ligase	-	-	-	-	-	-	-	-	-	-	-	-	Wzy_C
PALA8_05647	287.DR97_2442	5.95e-94	285.0	COG0790@1|root,COG0790@2|Bacteria,1N512@1224|Proteobacteria,1T0HY@1236|Gammaproteobacteria,1YKEH@136841|Pseudomonas aeruginosa group	1236|Gammaproteobacteria	S	Sel1-like repeats.	-	-	-	-	-	-	-	-	-	-	-	-	Sel1
PALA8_05722	287.DR97_2526	3.27e-276	756.0	COG1566@1|root,COG1566@2|Bacteria,1MU7I@1224|Proteobacteria,1RMAD@1236|Gammaproteobacteria,1YGHN@136841|Pseudomonas aeruginosa group	1236|Gammaproteobacteria	V	HlyD membrane-fusion protein of T1SS	emrA	-	-	ko:K03543	-	M00701	-	-	ko00000,ko00002,ko02000	8.A.1.1	-	-	Biotin_lipoyl_2,HlyD_3,HlyD_D23
PALA8_05725	287.DR97_2530	5.35e-215	593.0	COG1091@1|root,COG1091@2|Bacteria,1MUXM@1224|Proteobacteria,1RSNR@1236|Gammaproteobacteria,1YFWJ@136841|Pseudomonas aeruginosa group	1236|Gammaproteobacteria	M	Catalyzes the reduction of dTDP-6-deoxy-L-lyxo-4- hexulose to yield dTDP-L-rhamnose	rfbD	GO:0000271,GO:0003674,GO:0003824,GO:0005575,GO:0005622,GO:0005623,GO:0005737,GO:0005829,GO:0005975,GO:0005976,GO:0006629,GO:0008150,GO:0008152,GO:0008610,GO:0008653,GO:0008831,GO:0009058,GO:0009059,GO:0009103,GO:0009987,GO:0016051,GO:0016491,GO:0016614,GO:0016616,GO:0033692,GO:0034637,GO:0034645,GO:0043170,GO:0044237,GO:0044238,GO:0044249,GO:0044255,GO:0044260,GO:0044262,GO:0044264,GO:0044424,GO:…	1.1.1.133	ko:K00067	ko00521,ko00523,ko01130,map00521,map00523,map01130	M00793	R02777	RC00182	ko00000,ko00001,ko00002,ko01000	-	-	iECSF_1327.ECSF_1929,iEcHS_1320.EcHS_A2180	RmlD_sub_bind
PALA8_05802	287.DR97_2605	1.97e-223	621.0	COG2271@1|root,COG2271@2|Bacteria,1MX4V@1224|Proteobacteria,1RMB3@1236|Gammaproteobacteria,1YEF4@136841|Pseudomonas aeruginosa group	1236|Gammaproteobacteria	G	Major Facilitator Superfamily	glpT	GO:0003674,GO:0005215,GO:0005575,GO:0005623,GO:0005886,GO:0006810,GO:0006811,GO:0006817,GO:0006820,GO:0008150,GO:0008509,GO:0008643,GO:0015075,GO:0015103,GO:0015114,GO:0015144,GO:0015166,GO:0015168,GO:0015291,GO:0015297,GO:0015301,GO:0015315,GO:0015318,GO:0015527,GO:0015698,GO:0015711,GO:0015748,GO:0015791,GO:0015793,GO:0015794,GO:0015850,GO:0016020,GO:0022804,GO:0022857,GO:0034219,GO:0034220,GO:…	-	ko:K02445	-	-	-	-	ko00000,ko02000	2.A.1.4.3	-	iECH74115_1262.ECH74115_3377,iECIAI39_1322.ECIAI39_2383,iECSP_1301.ECSP_3115,iECs_1301.ECs3125,iEcSMS35_1347.EcSMS35_2392,iG2583_1286.G2583_2780,iSFV_1184.SFV_2312,iZ_1308.Z3498	MFS_1
PALA8_05832	1279015.KB908455_gene1475	3.58e-128	373.0	2BVAJ@1|root,32QQD@2|Bacteria,1RJBU@1224|Proteobacteria,1S8H8@1236|Gammaproteobacteria	1236|Gammaproteobacteria	-	-	-	-	-	-	-	-	-	-	-	-	-	-	-
PALA8_05833	1221522.B723_17470	3.76e-307	897.0	COG1388@1|root,COG1388@2|Bacteria,1NDDK@1224|Proteobacteria,1S1MQ@1236|Gammaproteobacteria	1236|Gammaproteobacteria	M	LysM domain	-	-	-	-	-	-	-	-	-	-	-	-	-
PALA8_05834	1117958.PE143B_0130830	2.13e-73	234.0	COG4104@1|root,COG4104@2|Bacteria	2|Bacteria	T	PAAR repeat-containing protein	-	-	-	-	-	-	-	-	-	-	-	-	DUF4123,Ntox44
PALA8_05836	287.DR97_2638	1.41e-125	357.0	COG3157@1|root,COG3157@2|Bacteria,1MXFB@1224|Proteobacteria,1RNKQ@1236|Gammaproteobacteria,1YEKZ@136841|Pseudomonas aeruginosa group	1236|Gammaproteobacteria	S	Type VI secretion system effector, Hcp	hcp	-	-	ko:K11903	ko02025,ko03070,map02025,map03070	M00334	-	-	ko00000,ko00001,ko00002,ko02044	-	-	-	T6SS_HCP
PALA8_05853	287.DR97_2655	4.85e-155	440.0	COG3539@1|root,COG3539@2|Bacteria	2|Bacteria	NU	cell adhesion	-	-	-	ko:K07345	ko05133,map05133	-	-	-	ko00000,ko00001,ko02035,ko02044	-	-	-	-
PALA8_05978	287.DR97_2783	5.55e-38	126.0	2BXT0@1|root,33HDE@2|Bacteria,1NP7I@1224|Proteobacteria,1TBDG@1236|Gammaproteobacteria,1YH8T@136841|Pseudomonas aeruginosa group	1236|Gammaproteobacteria	-	-	-	-	-	-	-	-	-	-	-	-	-	-	-
PALA8_06020	287.DR97_2826	1.47e-47	162.0	COG0438@1|root,COG0438@2|Bacteria,1MVB4@1224|Proteobacteria,1RNYM@1236|Gammaproteobacteria,1YEXS@136841|Pseudomonas aeruginosa group	1236|Gammaproteobacteria	M	Glycosyl transferases group 1	wbpZ	-	2.4.1.348	ko:K12995	-	-	-	-	ko00000,ko01000,ko01003,ko01005	-	GT4	-	Glyco_transf_4,Glycos_transf_1
PALA8_06071	287.DR97_2876	4.62e-152	434.0	COG4531@1|root,COG4531@2|Bacteria,1QTTI@1224|Proteobacteria,1RMRJ@1236|Gammaproteobacteria,1YEKA@136841|Pseudomonas aeruginosa group	1236|Gammaproteobacteria	P	Zinc-uptake complex component A periplasmic	znuA	GO:0000041,GO:0003674,GO:0005488,GO:0005575,GO:0005623,GO:0006810,GO:0006811,GO:0006812,GO:0006829,GO:0008150,GO:0008270,GO:0030001,GO:0042597,GO:0043167,GO:0043169,GO:0044464,GO:0046872,GO:0046914,GO:0051179,GO:0051234,GO:0070838,GO:0072511	-	ko:K09815	ko02010,map02010	M00242	-	-	ko00000,ko00001,ko00002,ko02000	3.A.1.15.3,3.A.1.15.5	-	iECs_1301.ECs2567,iEcSMS35_1347.EcSMS35_1329,iPC815.YPO2061,iZ_1308.Z2909	ZnuA
PALA8_06097	287.DR97_2903	2.3e-56	181.0	COG1028@1|root,COG1028@2|Bacteria,1RBU3@1224|Proteobacteria,1S5MG@1236|Gammaproteobacteria,1YE8X@136841|Pseudomonas aeruginosa group	1236|Gammaproteobacteria	IQ	KR domain	-	-	1.1.1.100	ko:K00059	ko00061,ko00333,ko00780,ko01040,ko01100,ko01130,ko01212,map00061,map00333,map00780,map01040,map01100,map01130,map01212	M00083,M00572	R04533,R04534,R04536,R04543,R04566,R04953,R04964,R07759,R07763,R10116,R10120,R11671	RC00029,RC00117	ko00000,ko00001,ko00002,ko01000,ko01004	-	-	-	adh_short_C2
PALA9_00005	287.DR97_2954	3.28e-193	536.0	COG2801@1|root,COG2801@2|Bacteria,1MVN5@1224|Proteobacteria,1RR8F@1236|Gammaproteobacteria,1YH5U@136841|Pseudomonas aeruginosa group	1236|Gammaproteobacteria	L	Integrase core domain	-	-	-	ko:K07497	-	-	-	-	ko00000	-	-	-	HTH_21,rve,rve_3
PALA9_00006	287.DR97_2955	1.77e-56	175.0	COG2963@1|root,COG2963@2|Bacteria,1MZ3D@1224|Proteobacteria,1S6K6@1236|Gammaproteobacteria,1YKUJ@136841|Pseudomonas aeruginosa group	1236|Gammaproteobacteria	L	Transposase	-	-	-	ko:K07497	-	-	-	-	ko00000	-	-	-	HTH_Tnp_1
PALA9_00007	287.DR97_2956	0.0	1868.0	COG0553@1|root,COG0553@2|Bacteria,1MX6H@1224|Proteobacteria,1RXWU@1236|Gammaproteobacteria,1YKMB@136841|Pseudomonas aeruginosa group	1236|Gammaproteobacteria	KL	SNF2 family N-terminal domain	-	-	-	-	-	-	-	-	-	-	-	-	Helicase_C,SNF2_N
PALA9_00008	287.DR97_2957	0.0	1437.0	2AJEZ@1|root,31A18@2|Bacteria,1MYNQ@1224|Proteobacteria,1S6ZK@1236|Gammaproteobacteria,1YHYZ@136841|Pseudomonas aeruginosa group	1236|Gammaproteobacteria	-	-	-	-	-	-	-	-	-	-	-	-	-	-	-
PALA9_00049	287.DR97_2997	2.97e-34	117.0	COG1943@1|root,COG1943@2|Bacteria	2|Bacteria	L	Transposase	-	-	-	ko:K07491	-	-	-	-	ko00000	-	-	-	Y1_Tnp
PALA9_00278	1218352.B597_020935	7.77e-55	171.0	2B7SZ@1|root,320ZE@2|Bacteria,1QDNT@1224|Proteobacteria,1T9R6@1236|Gammaproteobacteria,1Z3FZ@136846|Pseudomonas stutzeri group	1236|Gammaproteobacteria	-	-	-	-	-	-	-	-	-	-	-	-	-	-	-
PALA9_00279	1218352.B597_020930	8.34e-109	313.0	COG5642@1|root,COG5642@2|Bacteria,1RJWF@1224|Proteobacteria,1SAGC@1236|Gammaproteobacteria,1Z3BA@136846|Pseudomonas stutzeri group	1236|Gammaproteobacteria	S	Protein of unknown function (DUF2384)	-	-	-	-	-	-	-	-	-	-	-	-	DUF2384
PALA9_00280	1218352.B597_020920	1.26e-290	797.0	COG4942@1|root,COG4942@2|Bacteria,1MXRZ@1224|Proteobacteria,1RR9E@1236|Gammaproteobacteria,1Z4AF@136846|Pseudomonas stutzeri group	1236|Gammaproteobacteria	D	Protein of unknown function (DUF3375)	-	-	-	-	-	-	-	-	-	-	-	-	DUF3375
PALA9_00281	1218352.B597_020915	3.78e-168	471.0	28N0W@1|root,2ZB75@2|Bacteria,1R6H1@1224|Proteobacteria,1S0T7@1236|Gammaproteobacteria	1236|Gammaproteobacteria	S	Domain of unknown function (DUF4194)	-	-	-	-	-	-	-	-	-	-	-	-	DUF4194
PALA9_00282	1218352.B597_020910	0.0	2046.0	COG4913@1|root,COG4913@2|Bacteria,1N16Z@1224|Proteobacteria,1RPTX@1236|Gammaproteobacteria,1Z44C@136846|Pseudomonas stutzeri group	1236|Gammaproteobacteria	S	Putative exonuclease SbcCD, C subunit	-	-	-	-	-	-	-	-	-	-	-	-	AAA_29,SbcCD_C
PALA9_00283	1218352.B597_020905	3.29e-260	715.0	COG4924@1|root,COG4924@2|Bacteria,1P11B@1224|Proteobacteria,1RYWN@1236|Gammaproteobacteria,1Z4AS@136846|Pseudomonas stutzeri group	1236|Gammaproteobacteria	S	Uncharacterized protein conserved in bacteria N-term (DUF3322)	-	-	-	-	-	-	-	-	-	-	-	-	DUF2220,DUF3322
PALA9_00284	477228.YO5_14970	4.73e-31	109.0	2AFKK@1|root,315MK@2|Bacteria,1QDXJ@1224|Proteobacteria,1TA55@1236|Gammaproteobacteria,1Z4AG@136846|Pseudomonas stutzeri group	1236|Gammaproteobacteria	-	-	-	-	-	-	-	-	-	-	-	-	-	-	-
PALA9_00285	1215092.PA6_047_00060	9.15e-50	158.0	2AS8Z@1|root,31HN1@2|Bacteria,1QFCN@1224|Proteobacteria,1TCJS@1236|Gammaproteobacteria,1YKE6@136841|Pseudomonas aeruginosa group	1236|Gammaproteobacteria	-	-	-	-	-	-	-	-	-	-	-	-	-	-	-
PALA9_00286	1212548.B381_16880	1.46e-139	394.0	COG5340@1|root,COG5340@2|Bacteria,1R1GM@1224|Proteobacteria,1S2NC@1236|Gammaproteobacteria,1Z2PS@136846|Pseudomonas stutzeri group	1236|Gammaproteobacteria	K	Psort location Cytoplasmic, score	-	-	-	-	-	-	-	-	-	-	-	-	AbiEi_4
PALA9_00287	379731.PST_0552	4.41e-247	678.0	COG3335@1|root,COG3335@2|Bacteria,1MW8A@1224|Proteobacteria,1RY10@1236|Gammaproteobacteria,1Z3TW@136846|Pseudomonas stutzeri group	1236|Gammaproteobacteria	L	Winged helix-turn helix	-	-	-	-	-	-	-	-	-	-	-	-	DDE_3,HTH_23,HTH_28,HTH_29,HTH_33
PALA9_00288	1287276.X752_01760	1.96e-216	616.0	COG0405@1|root,COG0405@2|Bacteria,1MUV6@1224|Proteobacteria,2TQWP@28211|Alphaproteobacteria,43I3U@69277|Phyllobacteriaceae	28211|Alphaproteobacteria	E	Gamma-glutamyltranspeptidase	ggt1	-	2.3.2.2,3.4.19.13	ko:K00681	ko00430,ko00460,ko00480,ko01100,map00430,map00460,map00480,map01100	-	R00494,R01262,R01687,R03867,R03916,R03970,R03971,R04935	RC00064,RC00090,RC00096	ko00000,ko00001,ko01000,ko01002	-	-	-	G_glu_transpept
PALA9_00289	1097668.BYI23_C002270	1.71e-138	402.0	COG0111@1|root,COG0111@2|Bacteria,1P7J3@1224|Proteobacteria,2VJRM@28216|Betaproteobacteria,1K468@119060|Burkholderiaceae	28216|Betaproteobacteria	EH	D-isomer specific 2-hydroxyacid dehydrogenase, catalytic domain	-	-	1.1.1.399,1.1.1.95	ko:K00058	ko00260,ko00680,ko01100,ko01120,ko01130,ko01200,ko01230,map00260,map00680,map01100,map01120,map01130,map01200,map01230	M00020	R01513	RC00031	ko00000,ko00001,ko00002,ko01000,ko04147	-	-	-	2-Hacid_dh,2-Hacid_dh_C
PALA9_00290	1097668.BYI23_C002280	6.86e-185	524.0	COG4638@1|root,COG4638@2|Bacteria,1MWXW@1224|Proteobacteria,2VS7J@28216|Betaproteobacteria,1KGWP@119060|Burkholderiaceae	28216|Betaproteobacteria	P	Ring hydroxylating alpha subunit (catalytic domain)	-	-	1.14.13.239,1.14.15.7	ko:K00499,ko:K22443	ko00260,map00260	-	R07409	RC00087	ko00000,ko00001,ko01000	-	-	-	Rieske,Ring_hydroxyl_A
PALA9_00291	1168059.KB899087_gene3205	3.55e-81	251.0	COG0410@1|root,COG0410@2|Bacteria,1MVVC@1224|Proteobacteria,2TR61@28211|Alphaproteobacteria,3EZ2F@335928|Xanthobacteraceae	28211|Alphaproteobacteria	E	PFAM ABC transporter related	-	-	-	ko:K01996	ko02010,ko02024,map02010,map02024	M00237	-	-	ko00000,ko00001,ko00002,ko02000	3.A.1.4	-	-	ABC_tran,BCA_ABC_TP_C
PALA9_00292	1168059.KB899087_gene3204	5.71e-95	286.0	COG0411@1|root,COG0411@2|Bacteria,1MUTY@1224|Proteobacteria,2TQK1@28211|Alphaproteobacteria,3EYEH@335928|Xanthobacteraceae	28211|Alphaproteobacteria	P	PFAM ABC transporter related	-	-	-	ko:K01995,ko:K01998	ko02010,ko02024,map02010,map02024	M00237	-	-	ko00000,ko00001,ko00002,ko02000	3.A.1.4	-	-	ABC_tran,BCA_ABC_TP_C
PALA9_00293	1168059.KB899087_gene3203	6.14e-317	882.0	COG0559@1|root,COG4177@1|root,COG0559@2|Bacteria,COG4177@2|Bacteria,1MV66@1224|Proteobacteria,2TSJQ@28211|Alphaproteobacteria,3EYBW@335928|Xanthobacteraceae	28211|Alphaproteobacteria	E	Branched-chain amino acid transport system / permease component	livM	-	-	ko:K01997,ko:K01998	ko02010,ko02024,map02010,map02024	M00237	-	-	ko00000,ko00001,ko00002,ko02000	3.A.1.4	-	-	BPD_transp_2
PALA9_00294	1168059.KB899087_gene3202	6.11e-170	485.0	COG0683@1|root,COG0683@2|Bacteria,1PHP1@1224|Proteobacteria,2V88R@28211|Alphaproteobacteria,3F1T2@335928|Xanthobacteraceae	28211|Alphaproteobacteria	E	Receptor family ligand binding region	-	-	-	-	-	-	-	-	-	-	-	-	Peripla_BP_6
PALA9_00295	1033734.CAET01000006_gene3855	4.66e-09	63.5	COG2188@1|root,COG2188@2|Bacteria,1UYBW@1239|Firmicutes,4HDDG@91061|Bacilli,1ZE5X@1386|Bacillus	91061|Bacilli	K	UTRA	frlR3	-	-	ko:K03710	-	-	-	-	ko00000,ko03000	-	-	-	GntR,UTRA
PALA9_00296	1458357.BG58_39905	4.7e-174	504.0	COG1012@1|root,COG1012@2|Bacteria,1MU1V@1224|Proteobacteria,2VHGR@28216|Betaproteobacteria,1K1ED@119060|Burkholderiaceae	28216|Betaproteobacteria	C	Aldehyde dehydrogenase	-	-	1.2.1.16,1.2.1.20,1.2.1.79	ko:K00135	ko00250,ko00310,ko00350,ko00650,ko00760,ko01100,ko01120,map00250,map00310,map00350,map00650,map00760,map01100,map01120	M00027	R00713,R00714,R02401	RC00080	ko00000,ko00001,ko00002,ko01000	-	-	-	Aldedh
PALA9_00297	477228.YO5_15055	5.4e-179	509.0	COG4372@1|root,COG4372@2|Bacteria,1MUCX@1224|Proteobacteria,1SU06@1236|Gammaproteobacteria,1Z4F2@136846|Pseudomonas stutzeri group	1236|Gammaproteobacteria	S	Transposase IS66	-	-	-	-	-	-	-	-	-	-	-	-	DDE_Tnp_IS66,DDE_Tnp_IS66_C,LZ_Tnp_IS66,zf-IS66
PALA9_00298	1182590.BN5_00431	1.15e-177	500.0	COG3039@1|root,COG3039@2|Bacteria,1MUVI@1224|Proteobacteria,1RRUS@1236|Gammaproteobacteria,1YG87@136841|Pseudomonas aeruginosa group	1236|Gammaproteobacteria	L	hmm pf01609	-	-	-	-	-	-	-	-	-	-	-	-	DDE_Tnp_1,DUF772
PALA9_00299	477228.YO5_05906	4.26e-205	582.0	COG4584@1|root,COG4584@2|Bacteria,1MU2G@1224|Proteobacteria,1RQA2@1236|Gammaproteobacteria,1Z404@136846|Pseudomonas stutzeri group	1236|Gammaproteobacteria	L	cog cog4584	-	-	-	-	-	-	-	-	-	-	-	-	rve
PALA9_00300	1218352.B597_008325	8.52e-186	560.0	COG0582@1|root,COG0582@2|Bacteria,1N7DP@1224|Proteobacteria,1TCIG@1236|Gammaproteobacteria,1Z0G4@136846|Pseudomonas stutzeri group	1236|Gammaproteobacteria	L	viral genome integration into host DNA	-	-	-	-	-	-	-	-	-	-	-	-	-
PALA9_00301	322710.Avin_49670	5.99e-307	886.0	COG0582@1|root,COG0582@2|Bacteria,1NFF7@1224|Proteobacteria,1SF6K@1236|Gammaproteobacteria	1236|Gammaproteobacteria	L	Phage integrase family	-	-	-	-	-	-	-	-	-	-	-	-	Phage_integrase
PALA9_00302	1218352.B597_008335	6e-45	145.0	COG3655@1|root,COG3655@2|Bacteria,1NA11@1224|Proteobacteria,1SD6H@1236|Gammaproteobacteria,1Z3GC@136846|Pseudomonas stutzeri group	1236|Gammaproteobacteria	K	Transcriptional regulator	-	-	-	ko:K07727	-	-	-	-	ko00000,ko03000	-	-	-	HTH_26
PALA9_00303	1218352.B597_008340	2.59e-49	156.0	2E35B@1|root,32Y5A@2|Bacteria,1N850@1224|Proteobacteria,1SCFH@1236|Gammaproteobacteria,1Z3C5@136846|Pseudomonas stutzeri group	1236|Gammaproteobacteria	S	COG1197 Transcription-repair coupling factor (superfamily II helicase)	-	-	-	-	-	-	-	-	-	-	-	-	-
PALA9_00304	1218352.B597_008345	1.46e-284	776.0	COG0582@1|root,COG0582@2|Bacteria,1MVZB@1224|Proteobacteria,1RP4Y@1236|Gammaproteobacteria,1Z2A7@136846|Pseudomonas stutzeri group	1236|Gammaproteobacteria	L	Belongs to the 'phage' integrase family	-	-	-	ko:K14059	-	-	-	-	ko00000	-	-	-	Arm-DNA-bind_2,Phage_int_SAM_3,Phage_integrase
PALA9_00305	1218352.B597_008350	1.62e-62	191.0	2F7C5@1|root,33ZT7@2|Bacteria,1NXWP@1224|Proteobacteria,1SQCA@1236|Gammaproteobacteria,1Z3BI@136846|Pseudomonas stutzeri group	1236|Gammaproteobacteria	-	-	-	-	-	-	-	-	-	-	-	-	-	-	-
PALA9_00306	1218352.B597_008355	0.0	938.0	COG3829@1|root,COG3829@2|Bacteria,1NU8B@1224|Proteobacteria,1RR6D@1236|Gammaproteobacteria,1Z41G@136846|Pseudomonas stutzeri group	1236|Gammaproteobacteria	KT	Sigma-54 interaction domain	-	-	-	-	-	-	-	-	-	-	-	-	HTH_8,Sigma54_activat
PALA9_00307	1109445.AGSX01000152_gene3651	0.0	2189.0	COG4096@1|root,COG4096@2|Bacteria,1QTS7@1224|Proteobacteria,1RN63@1236|Gammaproteobacteria,1Z0HH@136846|Pseudomonas stutzeri group	1236|Gammaproteobacteria	L	COG4096 Type I site-specific restriction-modification system, R (restriction) subunit and related helicases	hsdR	-	3.1.21.3	ko:K01153	-	-	-	-	ko00000,ko01000,ko02048	-	-	-	DUF4145,EcoEI_R_C,HSDR_N,Helicase_C,ResIII
PALA9_00308	1218352.B597_008365	0.0	1041.0	COG0286@1|root,COG0286@2|Bacteria,1MW3A@1224|Proteobacteria,1RRVF@1236|Gammaproteobacteria,1Z11E@136846|Pseudomonas stutzeri group	1236|Gammaproteobacteria	V	HsdM N-terminal domain	-	-	2.1.1.72	ko:K03427	-	-	-	-	ko00000,ko01000,ko02048	-	-	-	HsdM_N,N6_Mtase
PALA9_00309	1430331.EP10_16325	3.12e-45	169.0	COG0732@1|root,COG0732@2|Bacteria,1TT1D@1239|Firmicutes,4HM1P@91061|Bacilli,1WG6P@129337|Geobacillus	91061|Bacilli	V	Type I restriction modification DNA specificity domain	-	-	3.1.21.3	ko:K01154	-	-	-	-	ko00000,ko01000,ko02048	-	-	-	Methylase_S
PALA9_00311	1109445.AGSX01000152_gene3655	0.0	1659.0	COG0210@1|root,COG0551@1|root,COG0210@2|Bacteria,COG0551@2|Bacteria,1MVWI@1224|Proteobacteria,1RN1N@1236|Gammaproteobacteria	1236|Gammaproteobacteria	L	DNA helicase	helD	-	3.6.4.12	ko:K03658	-	-	-	-	ko00000,ko01000,ko03400	-	-	-	Helicase_IV_N,UvrD-helicase,UvrD_C,zf-C4_Topoisom
PALA9_00312	1218352.B597_008390	0.0	1168.0	COG1479@1|root,COG3472@1|root,COG1479@2|Bacteria,COG3472@2|Bacteria,1R5X1@1224|Proteobacteria,1RYM1@1236|Gammaproteobacteria,1Z4CV@136846|Pseudomonas stutzeri group	1236|Gammaproteobacteria	S	Protein of unknown function DUF262	-	-	-	-	-	-	-	-	-	-	-	-	DUF1524,DUF262
PALA9_00313	1348657.M622_18930	4e-100	300.0	COG4245@1|root,COG4245@2|Bacteria,1MVUE@1224|Proteobacteria,2VXG6@28216|Betaproteobacteria	28216|Betaproteobacteria	S	Von Willebrand factor	-	-	-	-	-	-	-	-	-	-	-	-	VWA
PALA9_00314	1122218.KB893654_gene2621	3.33e-92	277.0	COG0631@1|root,COG0631@2|Bacteria,1RI8I@1224|Proteobacteria	1224|Proteobacteria	T	Protein phosphatase 2C	-	-	-	-	-	-	-	-	-	-	-	-	PP2C_2
PALA9_00315	1122218.KB893654_gene2622	1.45e-176	511.0	COG0515@1|root,COG0515@2|Bacteria,1QTS6@1224|Proteobacteria	1224|Proteobacteria	KLT	Protein kinase domain	-	-	-	-	-	-	-	-	-	-	-	-	Pkinase
PALA9_00316	1122218.KB893654_gene2623	0.0	1031.0	COG0507@1|root,COG1112@1|root,COG0507@2|Bacteria,COG1112@2|Bacteria,1MWW9@1224|Proteobacteria,2TTJ9@28211|Alphaproteobacteria	28211|Alphaproteobacteria	L	AAA domain	-	-	-	-	-	-	-	-	-	-	-	-	AAA_11,AAA_12,NERD
PALA9_00317	1122218.KB893654_gene2624	9.27e-132	397.0	2DM3U@1|root,31MFG@2|Bacteria,1RITG@1224|Proteobacteria	1224|Proteobacteria	-	-	-	-	-	-	-	-	-	-	-	-	-	-	-
[truncated: 7,444 more rows]

## Sheet: Core_genome_COGs
query	seed_ortholog	evalue	score	eggNOG_OGs	max_annot_lvl	COG_category	Description	Preferred_name	GOs	EC	KEGG_ko	KEGG_Pathway	KEGG_Module	KEGG_Reaction	KEGG_rclass	BRITE	KEGG_TC	CAZy	BiGG_Reaction	PFAMs
[truncated: 5,030 more rows]
